# Supplementary material for: Indazole enhances Ru-catalyzed hydrogenation of unsaturated bonds
Source: Royal Society of Chemistry journal article supplement (doi:10.1039/d4qo02176b), 2025-01-01

Supporting Information for:

## **Indazole enhances Ru-catalyzed hydrogenation of unsaturated bonds**

Wenjun Jiang,<sup>a,b</sup> Xiulin Li,<sup>b</sup> Yaru Liu,<sup>a</sup> Chunyan Zhang,<sup>c</sup> Guoying Zhang<sup>b\*</sup> & Ali Morsali<sup>d</sup>

<sup>a</sup>*School of Chemistry and Chemical Engineering, North University of China, Taiyuan 030001, P. R. China.*

<sup>b</sup>*State Key Laboratory of Coal Conversion, Institute of Coal Chemistry, Chinese Academy of Sciences, Taiyuan 030001, P. R. China.*

<sup>c</sup>*School of Environmental and Engineering, Taiyuan University of Technology, Taiyuan 030001, P. R. China.*

<sup>d</sup>*Department of Chemistry, Tarbiat Modares University, 14115-4838 Tehran, Islamic Republic of Iran.*

*E-mail: [zhanggy@sxicc.ac.cn](mailto:zhanggy@sxicc.ac.cn)*

## Table of contents

|   |                                                        |     |
|---|--------------------------------------------------------|-----|
| 1 | General .....                                          | S3  |
| 2 | Synthesis of ligand.....                               | S4  |
| 3 | Screening of hydrogenation reaction conditions.....    | S14 |
| 4 | General procedure for the hydrogenation reaction ..... | S23 |
| 5 | Characterization data.....                             | S24 |
| 6 | Gram scale experiments.....                            | S63 |
| 7 | Mechanism investigations .....                         | S71 |
| 8 | Reference .....                                        | S76 |
| 9 | NMR Spectra .....                                      | S79 |

## 1. General

**Experimental:** All reactions and manipulations with air sensitive compounds being present were performed under dry argon (Ar 5.0) or nitrogen (N<sub>2</sub> 5.0), using Schlenk and glove box techniques. Non-halogenated solvents were dried over sodium benzophenone, 2-methyltetrahydrofuran (2-Me-THF) was dried over calcium hydride, and halogenated solvents were dried over P<sub>2</sub>O<sub>5</sub>. Deuterated solvents were bought from Cambridge Isotope Laboratories, distilled accordingly, and stored over molecular sieves (3 Å). Other chemicals were purchased from commercial vendors and used without further purification. NMR spectra were collected on a Varian INOVA 300 and 400 MHz spectrometer. Chemical shifts ( $\delta$ ) are reported in ppm relative to residual solvent signal. Coupling constants ( $J$ ) are given in Hz (coupling patterns: s: singlet, s\_br: broad singlet, d: doublet, t: triplet, q: quartet, m: multiplet). GC analyses were carried out using an Agilent Technologies 6890N system equipped with a Machinery-Nagel (MN) Optima 5 HT column (30 m, 320  $\mu$ m, 0.25  $\mu$ m) or an Agilent Technologies 6850 system equipped with a MN Optima 17 column (30 m, 320  $\mu$ m, 0.25  $\mu$ m). GC/MS analyses were carried out on an Agilent 7890A/MSD 5975C system equipped with a HP-5MS column (30 m, 320  $\mu$ m, 0.25  $\mu$ m). High resolution mass spectra (HRMS) were recorded on Bruker MicroTOF-QII mass (ESI). MN silica gel 60 (0.040 – 0.063 mm particle size) was used for flash column chromatography.

## 2. Synthesis of ligand

### 2.1 Synthesis of L1 – L8

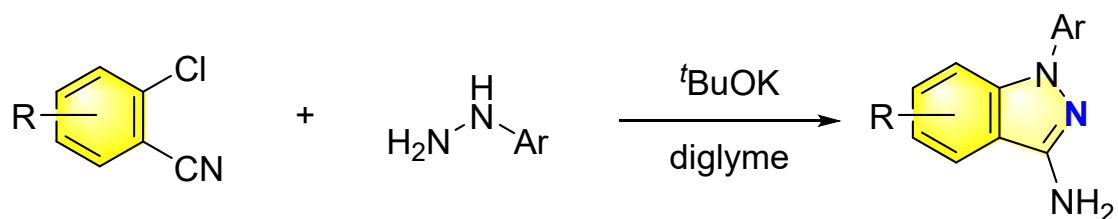

In a nitrogen-filled glove box, add a magnetic stirring bar, <sup>t</sup>BuOK (1.3 mmol), hydrazines (3.0 mmol), and diglyme (2.0 mL) to a dried pressure tube (38 mL volume). After stirring of 5 minutes, nitriles (1.0 mmol) were added the mixture reaction. Then the seal tube was closed tightly with a teflon cap, removed from the glove box and immersed into a pre-heated metal bath (130°C). After design time the reaction was cooled, quenched with saturated brine and extracted with DCM. The organic phase was dried over Na<sub>2</sub>SO<sub>4</sub> and concentrated. A small aliquot of the organic phase was analyzed by GC or GC-MS to monitor product formation. Purification of the remainder by column chromatography on silica gel to give the corresponding product (pentane/ethyl ether = 15:1 - 5:1).

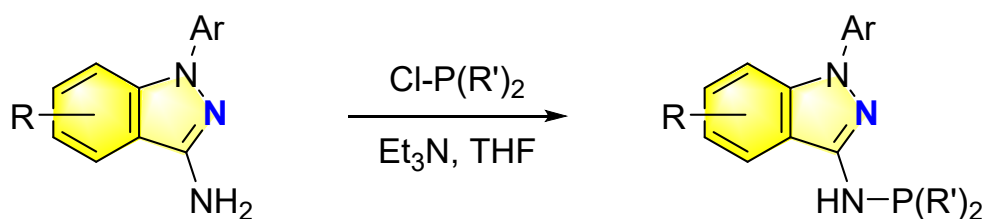

In a nitrogen-filled glove box, add a magnetic stirring bar, amines (1.0 mmol), Et<sub>3</sub>N (1.0 mmol), THF (2.0 mL) and phosphine chloride (1.0 mmol) to a dried schlenk tube. Then the seal tube was closed tightly with a teflon cap, removed from the glove box and immersed into a pre-heated metal bath (60°C) for 12 hours. After the reaction was finished, the reaction was analyzed by TLC to monitor product formation. A small aliquot of the organic phase was analyzed by GC or GC-MS to monitor product formation. The solvent was evaporated under reduced pressure and the residue was



purified by flash column chromatography on Al<sub>2</sub>O<sub>3</sub> to give the product **L1 - L8** in the reported yields.

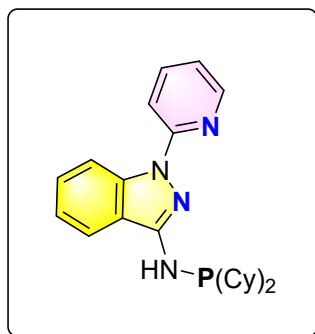

***N*-(dicyclohexylphosphaneyl)-1-(pyridin-2-yl)-1*H*-indazol-3-amine (L1)<sup>1</sup>**

The title compound was prepared according to the general procedure and purified by column chromatography to give the white solid, 80% yield.

<sup>1</sup>H NMR (400 MHz, CDCl<sub>3</sub>) δ 8.79 (d, *J* = 8.4 Hz, 1H), 8.44 – 8.42 (m, 1H), 8.16 (d, *J* = 7.6 Hz, 1H), 7.83 (d, *J* = 8.4 Hz, 1H), 7.73 – 7.70 (m, 1H), 7.47 (t, *J* = 8.0 Hz, 1H), 7.18 (t, *J* = 7.6 Hz, 1H), 6.70 – 6.97 (m, 1H), 4.61 (d, *J* = 4.8 Hz, 1H), 1.88 – 1.68 (m, 12H), 1.33 – 1.20 (m, 10H) ppm.

<sup>13</sup>C NMR (101 MHz, CDCl<sub>3</sub>) δ 154.3, 147.5, 140.4, 137.8, 128.3, 121.9, 121.8, 120.7, 118.0, 115.2, 112.4, 36.7, 36.6, 29.1, 28.9, 27.2, 27.1, 26.8, 26.8 ppm.

<sup>31</sup>P NMR (162 MHz, CDCl<sub>3</sub>) δ 48.7 ppm.

HRMS (ESI) calcd for C<sub>24</sub>H<sub>32</sub>N<sub>4</sub>P: [M+H]: 407.2364, found:407.2360.

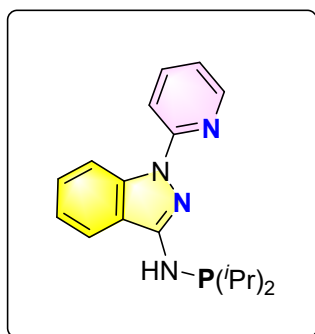

***N*-(diisopropylphosphaneyl)-1-(pyridin-2-yl)-1*H*-indazol-3-amine (L2)<sup>1</sup>**

The title compound was prepared according to the general procedure and purified by column chromatography to give the white solid, 77% yield.

**<sup>1</sup>H NMR** (400 MHz, CDCl<sub>3</sub>) δ 8.82 (d, *J* = 8.8 Hz, 1H), 8.45 – 8.44 (m, 1H), 8.14 (d, *J* = 8.0 Hz, 1H), 7.84 (d, *J* = 8.4 Hz, 1H), 7.73 – 7.70 (m, 1H), 7.49 – 7.43 (m, 1H), 7.22 – 7.17 (m, 1H), 6.98 – 6.93 (m, 1H), 4.61 (d, *J* = 5.6 Hz, 1H), 2.00 – 1.91 (m, 2H), 1.20 – 1.14 (m, 12H) ppm.

**<sup>13</sup>C NMR** (101 MHz, CDCl<sub>3</sub>) δ 154.2, 151.3, 151.2, 147.4, 140.3, 137.7, 128.2, 121.5, 121.4, 120.7, 117.9, 117.9, 115.1, 112.3, 26.8, 26.7, 18.8, 18.6, 17.3, 17.2 ppm.

**<sup>31</sup>P NMR** (162 MHz, CDCl<sub>3</sub>) δ 55.6 ppm.

**HRMS** (ESI) calcd for C<sub>18</sub>H<sub>24</sub>N<sub>4</sub>P: [M+H]: 327.1738, found:327.1741.

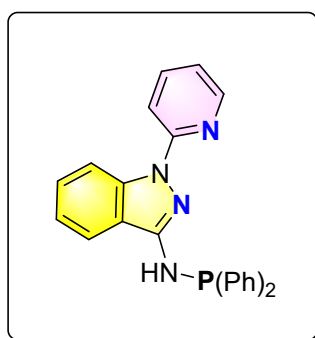

***N*-(diphenylphosphaneyl)-1-(pyridin-2-yl)-1*H*-indazol-3-amine (L3)<sup>1</sup>**

The title compound was prepared according to the general procedure and purified by column chromatography to give the white solid, 85% yield.

**<sup>1</sup>H NMR** (400 MHz, CDCl<sub>3</sub>) δ 8.84 (d, *J* = 8.8 Hz, 1H), 8.44 (d, *J* = 3.2 Hz, 1H), 7.99 (d, *J* = 8.0 Hz, 1H), 7.82 (d, *J* = 8.4 Hz, 1H), 7.69 (t, *J* = 8.8 Hz, 1H), 7.62 – 7.54 (m, 4H), 7.51 (t, *J* = 8.0 Hz, 1H), 7.46 – 7.35 (m, 6H), 7.20 (t, *J* = 7.6 Hz, 1H), 7.03 – 6.95 (m, 1H), 5.18 (d, *J* = 6.4 Hz, 1H) ppm.

**<sup>13</sup>C NMR** (101 MHz, CDCl<sub>3</sub>) δ 154.3, 149.7, 149.6, 147.5, 140.3, 140.1, 140.0, 137.9, 131.5, 131.3, 129.4, 128.7, 128.6, 128.6, 121.2, 120.6, 120.5, 118.3, 118.0, 118.0, 115.5, 112.6 ppm.

**<sup>31</sup>P NMR** (162 MHz, CDCl<sub>3</sub>) δ 32.1 ppm.

**HRMS** (ESI) calcd for C<sub>24</sub>H<sub>20</sub>N<sub>4</sub>P: [M+H]: 395.1425, found: 395.1423.

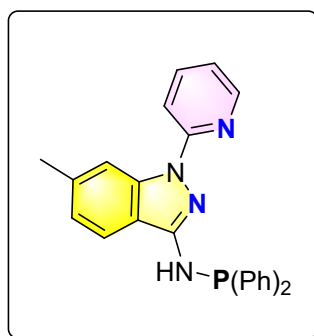

***N*-(diphenylphosphaneyl)-6-methyl-1-(pyridin-2-yl)-1*H*-indazol-3-amine (L4)<sup>1</sup>**

The title compound was prepared according to the general procedure and purified by column chromatography to give the white solid, 86% yield.

<sup>1</sup>H NMR (400 MHz, CDCl<sub>3</sub>) δ 8.63 (s, 1H), 8.35 (d, *J* = 4.0 Hz, 1H), 7.79 (dd, *J* = 27.6, 8.4 Hz, 2H), 7.50 – 7.49 (m, 5H), 7.30 – 7.29 (m, 6H), 6.93 (d, *J* = 8.0 Hz, 1H), 6.86 (dd, *J* = 6.8, 5.2 Hz, 1H), 5.26 (d, *J* = 6.4 Hz, 1H), 2.47 (s, 3H) ppm.

<sup>13</sup>C NMR (101 MHz, CDCl<sub>3</sub>) δ 153.2, 148.6, 148.5, 146.2, 139.8, 139.0, 138.9, 137.9, 136.7, 130.3, 130.1, 128.1, 127.5, 127.4, 122.1, 119.2, 119.0, 116.9, 115.1, 115.0, 113.9, 111.5, 21.1 ppm.

<sup>31</sup>P NMR (162 MHz, CDCl<sub>3</sub>) δ 32.2 ppm.

HRMS (ESI) calcd for C<sub>25</sub>H<sub>22</sub>N<sub>4</sub>P: [M+H]<sup>+</sup>: 409.1582, found: 409.1580.

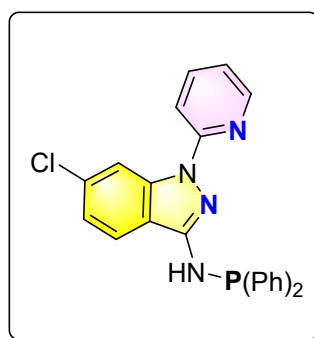

**6-chloro-*N*-(diphenylphosphaneyl)-1-(pyridin-2-yl)-1*H*-indazol-3-amine (L5)<sup>1</sup>**

The title compound was prepared according to the general procedure and purified by column chromatography to give the white solid, 81% yield.

<sup>1</sup>H NMR (400 MHz, CDCl<sub>3</sub>) δ 8.88 (s, 1H), 8.45 – 8.39 (m, 1H), 7.91 (d, *J* = 8.4 Hz, 1H), 7.77 (d, *J* = 8.4 Hz, 1H), 7.67 (d, *J* = 7.6 Hz, 1H), 7.51 – 7.36 (m, 10H), 7.11 (d, *J* = 8.4 Hz, 1H), 7.00 – 6.96 (m, 1H), 5.21 (d, *J* = 6.0 Hz, 1H) ppm.

$^{13}\text{C}$  NMR (101 MHz,  $\text{CDCl}_3$ )  $\delta$  153.8, 149.5, 149.3, 147.4, 140.4, 139.8, 139.7, 138.0, 134.7, 131.4, 131.2, 129.4, 128.7, 128.6, 122.0, 121.6, 121.5, 118.6, 115.3, 112.4 ppm.

$^{31}\text{P}$  NMR (162 MHz,  $\text{CDCl}_3$ )  $\delta$  32.6 ppm.

HRMS (ESI) calcd for  $\text{C}_{24}\text{H}_{19}\text{ClN}_4\text{P}$ :  $[\text{M}+\text{H}]$ : 429.1036, found: 429.1034.

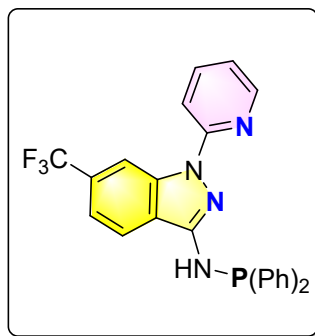

***N*-(diphenylphosphaneyl)-1-(pyridin-2-yl)-6-(trifluoromethyl)-1*H*-indazol-3-amine (L6)<sup>1</sup>**

The title compound was prepared according to the general procedure and purified by column chromatography to give the white solid, 72% yield.

$^1\text{H}$  NMR (400 MHz,  $\text{CDCl}_3$ )  $\delta$  9.22 (s, 1H), 8.50 – 8.45 (m, 1H), 8.13 (d,  $J = 8.4$  Hz, 1H), 7.81 (d,  $J = 8.4$  Hz, 1H), 7.74 – 7.70 (m, 1H), 7.58 – 7.54 (m, 4H), 7.40 – 7.37 (m, 7H), 7.03 – 7.01 (m, 1H), 5.24 (d,  $J = 6.4$  Hz, 1H) ppm.

$^{13}\text{C}$  NMR (101 MHz,  $\text{CDCl}_3$ )  $\delta$  153.8, 149.4, 149.2, 147.5, 139.6, 139.5, 139.2, 138.0, 131.4, 131.2, 130.4, 130.1, 129.4, 128.7, 128.6, 125.8, 123.1, 121.5, 121.4, 119.6, 118.9, 117.5, 113.3, 113.3, 112.5 ppm.

$^{31}\text{P}$  NMR (162 MHz,  $\text{CDCl}_3$ )  $\delta$  32.9 ppm.

$^{19}\text{F}$  NMR (376 MHz,  $\text{CDCl}_3$ )  $\delta$  -61.5 ppm.

HRMS (ESI) calcd for  $\text{C}_{25}\text{H}_{19}\text{F}_3\text{N}_4\text{P}$ :  $[\text{M}+\text{H}]$ : 463.1299, found: 463.1304.

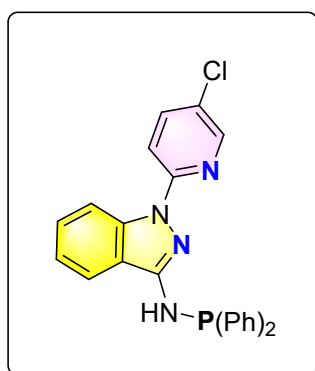

**1-(5-chloropyridin-2-yl)-*N*-(diphenylphosphaneyl)-1*H*-indazol-3-amine (L7)<sup>1</sup>**

The title compound was prepared according to the general procedure and purified by column chromatography to give the white solid, 80% yield.

<sup>1</sup>H NMR (400 MHz, CDCl<sub>3</sub>) δ 8.71 (d, *J* = 8.8 Hz, 1H), 8.34 (d, *J* = 2.4 Hz, 1H), 7.94 (d, *J* = 8.0 Hz, 1H), 7.74 (d, *J* = 8.8 Hz, 1H), 7.58 (dd, *J* = 8.8, 2.4 Hz, 1H), 7.54 – 7.50 (m, 4H), 7.47 – 7.43 (m, 1H), 7.39 – 7.36 (m, 6H), 7.18 (t, *J* = 7.6 Hz, 1H), 5.17 (d, *J* = 6.4 Hz, 1H) ppm.

<sup>13</sup>C NMR (101 MHz, CDCl<sub>3</sub>) δ 152.5, 150.1, 149.9, 145.9, 140.2, 140.0, 139.8, 137.7, 131.5, 131.3, 129.4, 128.8, 128.7, 128.7, 125.4, 121.5, 120.6, 120.5, 118.3, 118.3, 115.5, 113.5 ppm.

<sup>31</sup>P NMR (162 MHz, CDCl<sub>3</sub>) δ 32.3 ppm.

HRMS (ESI) calcd for C<sub>24</sub>H<sub>19</sub>ClN<sub>4</sub>P: [M+H]: 429.1036, found:429.1032.

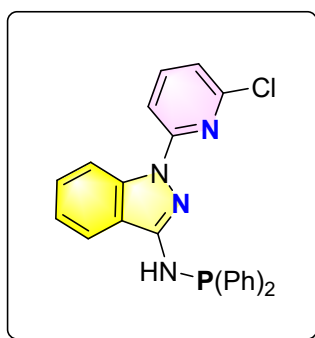

**1-(6-chloropyridin-2-yl)-*N*-(diphenylphosphaneyl)-1*H*-indazol-3-amine (L8)<sup>1</sup>**

The title compound was prepared according to the general procedure and purified by column chromatography to give the white solid, 72% yield.

<sup>1</sup>H NMR (400 MHz, CDCl<sub>3</sub>) δ 8.74 (d, *J* = 8.8 Hz, 1H), 7.92 (d, *J* = 8.0 Hz, 1H), 7.68 (d, *J* = 8.0 Hz, 1H), 7.59 (t, *J* = 8.0 Hz, 1H), 7.55 – 7.48 (m, 5H), 7.40 – 7.38 (m, 6H), 7.20 (t, *J* = 7.6 Hz, 1H), 6.96 (d, *J* = 7.6 Hz, 1H), 5.11 (d, *J* = 6.4 Hz, 1H) ppm.

<sup>13</sup>C NMR (101 MHz, CDCl<sub>3</sub>) δ 153.6, 150.3, 150.1, 148.8, 140.2, 140.1, 139.8, 139.7, 131.4, 131.2, 129.4, 128.9, 128.6, 128.6, 121.7, 120.4, 120.3, 118.3, 117.6, 115.7, 110.3 ppm.

<sup>31</sup>P NMR (162 MHz, CDCl<sub>3</sub>) δ 32.1 ppm.

HRMS (ESI) calcd for C<sub>24</sub>H<sub>19</sub>ClN<sub>4</sub>P: [M+H]: 429.1036, found:429.1038.

## 2.2 Synthesis of L9

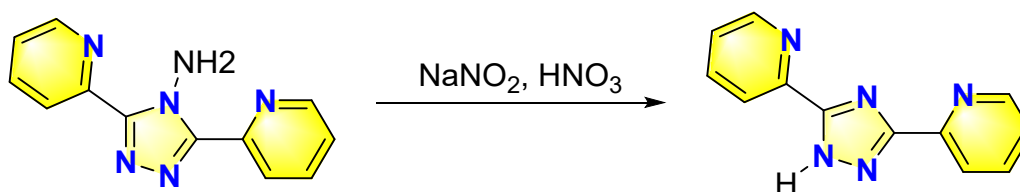

In a nitrogen-filled glove box, add a magnetic stirring bar, 3,5-di(2-pyridyl)-4-amino-1,2,4-triazole (1.0 mmol) was dissolved in aqueous boiling nitric acid (5 N) to a dried pressure tube (100 mL volume). The solution was cooled down to 0 °C, and saturated aqueous sodium nitrite solution was added. After that, it was kept under reflux for 2 hours and, upon cooling, poured into ammonium hydroxide solution to obtain a white precipitate of 2,2'-(1H-1,2,4-triazole-3,5-diyl)dipyridine, which was carefully washed several times with ice-cold water to get the corresponding product **L9** in the reported yield. A small aliquot of the organic solid was analyzed by GC-MS to monitor product formation.

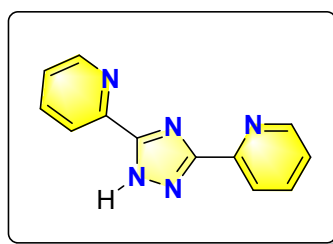

### 2,2'-(1H-1,2,4-triazole-3,5-diyl)dipyridine (L9)<sup>2</sup>

The title compound was prepared according to the general procedure and purified by column chromatography to give the white solid, 71% yield. Purification by column chromatography on silica gel (pentane/ethyl ether = 20:1 - 2:1, DCM 5%).

<sup>1</sup>H NMR (400 MHz, DMSO-*d*<sub>6</sub>): δ 14.99 (s, 1H), 8.72 (s, 2H), 8.18 (s, 2H), 7.97 (s, 2H), 7.51 (s, 2H) ppm.

### 2.3 Synthesis of L10

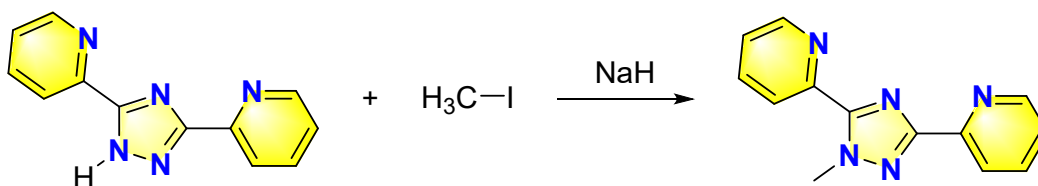

In a nitrogen-filled glove box, add a magnetic stirring bar, 2,2'-(1H-1,2,4-triazole-3,5-diyl)dipyridine (2.0 mmol), NaH (2.5 mmol) into a dried pressure tube (38 mL volume) containing DMF (5.0 mL) at 0 °C for 10 min. Iodomethane (3.0 mmol) in 2.0 mL DMF was added dropwise to the reaction mixture, and then the solution was stirred at room temperature for an additional 12 hours. After that, the mixture was poured into the ice water, and extracted with DCM. Then, the organic layer was dried over Na<sub>2</sub>SO<sub>4</sub>. A small aliquot of the organic phase was analyzed by GC-MS to monitor product formation. Purification of the remainder by column chromatography on silica gel gave the corresponding products **L10** in the reported yields.

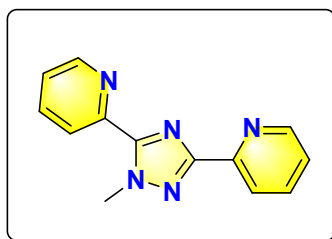

#### 2,2'-(1-methyl-1H-1,2,4-triazole-3,5-diyl)dipyridine (L10)<sup>3</sup>

The title compound was prepared according to the general procedure and purified by column chromatography to give the white solid, 66% yield. Purification by column chromatography on silica gel (pentane/ethyl ether = 20:1 - 2:1, DCM 5%).

<sup>1</sup>H NMR (400 MHz, CDCl<sub>3</sub>): δ 8.73 (d, *J* = 4.0, 2.0 Hz, 1H), 8.66 (d, *J* = 4.4, 2.0 Hz, 1H), 8.37 (d, *J* = 4.4, 2.0 Hz, 1H), 8.17 (d, *J* = 4.0, 2.0 Hz, 1H), 7.87 – 7.84 (m, 1H), 7.82 – 7.79 (m, 1H), 7.37 – 7.35 (m, 1H), 7.31 – 7.28 (m, 1H), 4.43 (s, 3H) ppm.

## 2.4 Synthesis of L11 – L13

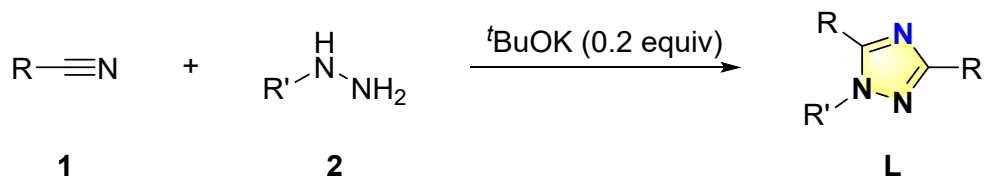

In a nitrogen-filled glove box, add a magnetic stirring bar, <sup>t</sup>BuOK (112.0 mg, 1.0 mmol), nitriles **1** (5.0 mmol), hydrazines **2** (5.0 mmol), and 1,4-dioxane (5.0 mL) to a dried pressure tube (38 mL volume). Then the seal tube was closed tightly with a teflon cap, remove the pressure tube from the glove box and immersed into a pre-heated metal bath (120 °C). After 24 h the reaction was cooled, then quenched with saturated brine (200 μL) and EA, and dried with Na<sub>2</sub>SO<sub>4</sub>. A small aliquot of the organic phase was analyzed by GC or GC-MS to monitor product formation. Then the solvent was evaporated under reduced pressure and the residue was purified by flash column chromatography (petroleum ether/ethyl acetate = 100:1 - 1:4, DCM 2%) on silica gel to give the corresponding product **L11 - L14**.

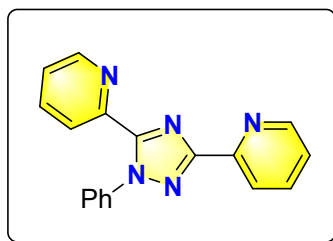

### 2,2'-(1-phenyl-1H-1,2,4-triazole-3,5-diyl)dipyridine (**L11**)<sup>4</sup>

The title compound was prepared according to the general procedure and purified by column chromatography to give the white solid, 83% yield. Purification by column chromatography on silica gel (pentane/ethyl ether = 20:1 - 2:1, DCM 5%).

<sup>1</sup>H NMR (400 MHz, CDCl<sub>3</sub>) δ 8.79 (d, *J* = 4.4 Hz, 1H), 8.46 (d, *J* = 4.4 Hz, 1H), 8.28 (d, *J* = 8.0 Hz, 1H), 8.06 (d, *J* = 8.0 Hz, 1H), 7.83 – 7.80 (m, 2H), 7.47 – 7.40 (m, 2H), 7.43 – 7.39 (m, 3H), 7.37 – 7.32 (m, 1H), 7.28 (dd, *J* = 4.4, 3.2 Hz, 1H) ppm.



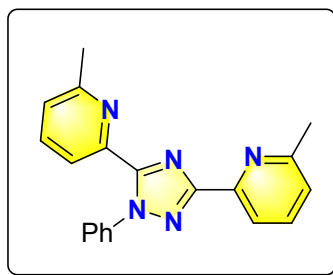

**6,6'-(1-phenyl-1H-1,2,4-triazole-3,5-diyl)bis(2-methylpyridine) (L12)<sup>5</sup>**

The title compound was prepared according to the general procedure and purified by column chromatography to give the white solid, 65% yield. Purification by column chromatography on silica gel (pentane/ethyl ether = 20:1 - 2:1, DCM 5%).

<sup>1</sup>H NMR (400 MHz, CDCl<sub>3</sub>) δ 8.10 (d, *J* = 7.6 Hz, 1H), 7.81 (d, *J* = 7.6 Hz, 1H), 7.73 – 7.61 (m, 2H), 7.49 – 7.30 (m, 5H), 7.21 (d, *J* = 7.6 Hz, 1H), 7.11 (d, *J* = 7.2 Hz, 1H), 2.69 (s, 3H), 2.33 (s, 3H) ppm.

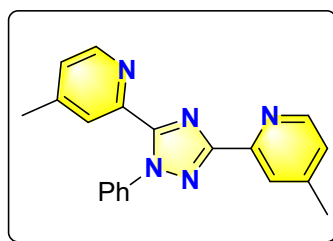

**2,2'-(1-phenyl-1H-1,2,4-triazole-3,5-diyl)bis(4-methylpyridine) (L13)<sup>5</sup>**

The title compound was prepared according to the general procedure and purified by column chromatography to give the white solid, 73% yield. Purification by column chromatography on silica gel (pentane/ethyl ether = 20:1 - 2:1, DCM 5%).

<sup>1</sup>H NMR (400 MHz, CDCl<sub>3</sub>) δ 8.63 (d, *J* = 5.2 Hz, 1H), 8.30 (d, *J* = 5.2 Hz, 1H), 8.15 (d, *J* = 0.8 Hz, 1H), 8.01 (d, *J* = 0.8 Hz, 1H), 7.51 – 7.43 (m, 2H), 7.41 – 7.38 (m, 3H), 7.16 (dd, *J* = 5.2, 0.8 Hz, 1H), 7.13 (dd, *J* = 4.8, 0.8 Hz, 1H), 2.42 (s, 3H), 2.40 (s, 3H) ppm.

### 3. Screening of hydrogenation reaction conditions

Closed system:

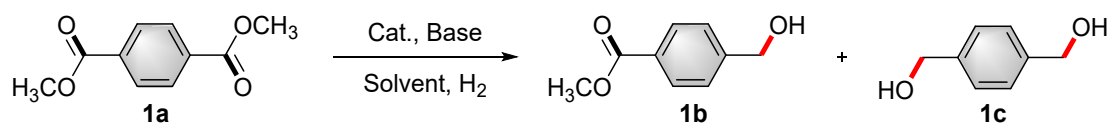

In a nitrogen-filled glove box, add a magnetic stirring bar, dimethyl terephthalate (1a), base, catalyst, and solvent to a dried high-pressure reactor. After sealing, remove the high-pressure reactor from the glove box. Then fill the reactor with hydrogen (design pressure) and immerse it in a pre-heated metal bath (design temperature). After design time the reaction was cooled, quenched with saturated brine (100  $\mu$ L) and dried over Na<sub>2</sub>SO<sub>4</sub>. A small aliquot of the organic phase was analyzed by GC or GC-MS to monitor product formation and gave the corresponding product in the reported yield.

| Entry    | Conditions                                                      |
|----------|-----------------------------------------------------------------|
| Table S1 | Screening of different solvents                                 |
| Table S2 | Screening of different base                                     |
| Table S3 | Screening the loading of 'BuOK                                  |
| Table S4 | Screening the press of H <sub>2</sub> in hydrogenation reaction |
| Table S5 | Screening the temperature of hydrogenation reaction             |
| Table S6 | Screening the loading of catalyst                               |
| Table S7 | Screening of different catalyst                                 |
| Table S8 | Screening the time of hydrogenation reaction                    |

**Table S1.** Screening of different solvents. [a]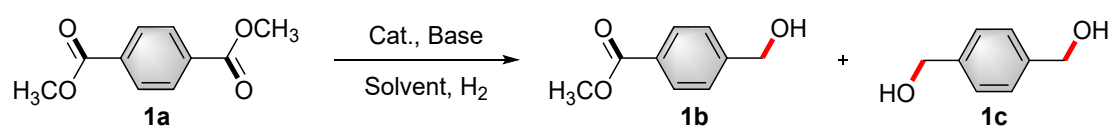

| Entry    | Solvent (2 mL)     | Yield <b>1b</b> (%) | <b>1b/1c</b> |
|----------|--------------------|---------------------|--------------|
| 1        | toluene            | 16                  | 5:1          |
| 2        | anisole            | 32                  | 19:1         |
| <b>3</b> | <b>1,4-dioxane</b> | <b>45</b>           | <b>5:1</b>   |
| 4        | THF                | 44                  | 5:1          |
| 5        | diglyme            | 17                  | 17:1         |
| 6        | <i>t</i> AmOH      | 17                  | 15:1         |
| 7        | <i>t</i> BuOH      | 14                  | 10:1         |
| 8        | EtOH               | <5                  | -            |
| 9        | MeOH               | <5                  | -            |
| 10       | EA                 | <5                  | -            |
| 11       | MeCN               | <5                  | -            |
| 12       | DCM                | <5                  | -            |
| 13       | NMP                | <5                  | -            |
| 14       | DMF                | <5                  | -            |
| 15       | DMAc               | <5                  | -            |
| 16       | DMSO               | <5                  | -            |

[a] Reaction conditions: **1a** (0.5 mmol), H<sub>2</sub> (4.0 MPa), RuCl<sub>2</sub>(PPh<sub>3</sub>)<sub>3</sub> (1 mol%), **L3** (1.2 mol%), *t*BuOK (20 mol%), solvent (2.0 mL), 130 °C for 24 h. Yield of **1b** and the ratio of **1b/1c** were detected by GC analysis with *n*-cetane as the internal standard.

**Table S2.** Screening of different base. [a]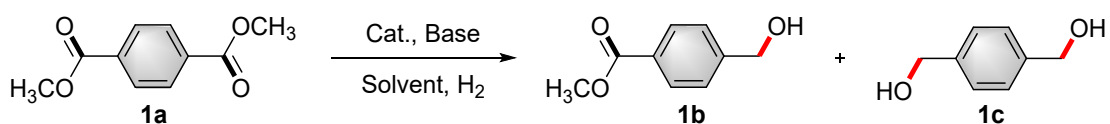

| Entry    | Base                                               | Yield <b>1b</b> (%) | <b>1b/1c</b> |
|----------|----------------------------------------------------|---------------------|--------------|
| 1        | <sup>t</sup> BuOLi                                 | 6                   | 15:1         |
| 2        | <sup>t</sup> BuONa                                 | 43                  | 5:1          |
| <b>3</b> | <b><sup>t</sup>BuOK</b>                            | <b>45</b>           | <b>5:1</b>   |
| 4        | ( <sup>t</sup> BuO) <sub>2</sub> Mg <sup>[b]</sup> | <5                  | -            |
| 5        | LiOH                                               | 5                   | 10:1         |
| 6        | NaOH                                               | 10                  | 12:1         |
| 7        | KOH                                                | 8                   | 10:1         |
| 8        | CsOH                                               | <5                  | -            |
| 9        | Li <sub>2</sub> CO <sub>3</sub>                    | <5                  | -            |
| 10       | Na <sub>2</sub> CO <sub>3</sub>                    | <5                  | -            |
| 11       | K <sub>2</sub> CO <sub>3</sub>                     | <5                  | -            |
| 12       | Cs <sub>2</sub> CO <sub>3</sub>                    | <5                  | -            |
| 13       | Py                                                 | <5                  | -            |
| 14       | DBU                                                | <5                  | -            |
| 15       | TBD                                                | <5                  | -            |
| 16       | Et <sub>3</sub> N                                  | <5                  | -            |

[a] Reaction conditions: **1a** (0.5 mmol), H<sub>2</sub> (4.0 MPa), RuCl<sub>2</sub>(PPh<sub>3</sub>)<sub>3</sub> (1 mol%), **L3** (1.2 mol%), base (20 mol%), 1,4-dioxane (2.0 mL), 130 °C for 24 h. Yield of **1b** and the ratio of **1b/1c** were detected by GC analysis with *n*-cetane as the internal standard.

[b] (<sup>t</sup>BuO)<sub>2</sub>Mg (10 mol%).

**Table S3.** Screening the loading of <sup>t</sup>BuOK. [a]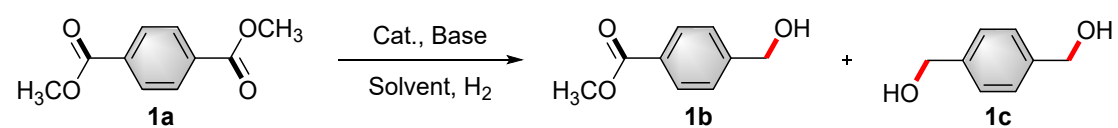

| Entry | <sup>t</sup> BuOK | Yield <b>1b</b> (%) | <b>1b/1c</b> |
|-------|-------------------|---------------------|--------------|
| 1     | 0                 | 0                   | -            |
| 2     | 1                 | <5                  | -            |
| 3     | 2                 | <5                  | -            |
| 4     | 4                 | 13                  | -            |
| 5     | 6                 | 38                  | 19:1         |
| 6     | 8                 | 62                  | 10:1         |
| 7     | <b>10</b>         | <b>77</b>           | <b>6:1</b>   |
| 8     | 12                | 74                  | 5:1          |
| 9     | 15                | 65                  | 5:1          |
| 10    | 20                | 45                  | 5:1          |
| 11    | 30                | 25                  | 3:1          |
| 12    | 40                | 16                  | 2:1          |
| 13    | 50                | 9                   | 2:1          |
| 14    | 100               | <5                  | -            |
| 15    | 200               | <5                  | -            |
| 16    | 300               | <5                  | -            |

[a] Reaction conditions: **1a** (0.5 mmol), H<sub>2</sub> (4.0 MPa), RuCl<sub>2</sub>(PPh<sub>3</sub>)<sub>3</sub> (1 mol%), **L3** (1.2 mol%), <sup>t</sup>BuOK (x mol%), 1,4-dioxane (2.0 mL), 130 °C for 24 h. Yield of **1b** and the ratio of **1b/1c** were detected by GC analysis with *n*-cetane as the internal standard.

**Table S4.** Screening the press of H<sub>2</sub> in hydrogenation reaction. [a]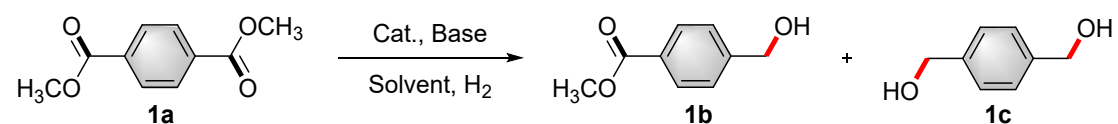

| Entry    | H <sub>2</sub> (MPa) | Yield <b>1b</b> (%) | <b>1b/1c</b> |
|----------|----------------------|---------------------|--------------|
| 1        | 4.0                  | 77                  | 6:1          |
| 2        | 3.5                  | 79                  | 7:1          |
| 3        | 3.0                  | 78                  | 7:1          |
| 4        | 2.5                  | 80                  | 8:1          |
| <b>5</b> | <b>2.0</b>           | <b>79</b>           | <b>8:1</b>   |
| 6        | 1.5                  | 68                  | 10:1         |
| 7        | 1.0                  | 50                  | 15:1         |
| 8        | 0.5                  | 27                  | 19:1         |
| 9        | 0.1                  | <5                  | -            |
| 10       | Ar or N <sub>2</sub> | 0                   | -            |

[a] Reaction conditions: **1a** (0.5 mmol), H<sub>2</sub> (x MPa), RuCl<sub>2</sub>(PPh<sub>3</sub>)<sub>3</sub> (1 mol%), **L3** (1.2 mol%), <sup>t</sup>BuOK (10 mol%), 1,4-dioxane (2.0 mL), 130 °C for 24 h. Yield of **1b** and the ratio of **1b/1c** were detected by GC analysis with *n*-cetane as the internal standard.

**Table S5.** Screening the temperature of hydrogenation reaction. <sup>[a]</sup>

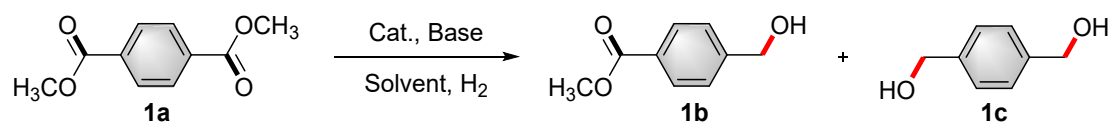

| Entry    | T (°C)     | Yield <b>1b</b> (%) | <b>1b/1c</b> |
|----------|------------|---------------------|--------------|
| 1        | 130        | 79                  | 8:1          |
| <b>2</b> | <b>110</b> | <b>83</b>           | <b>12:1</b>  |
| 3        | 90         | 72                  | 15:1         |
| 4        | 70         | 28                  | 18:1         |
| 5        | 50         | <5                  | -            |
| 6        | rt         | <5                  | -            |

[a] Reaction conditions: **1a** (0.5 mmol), H<sub>2</sub> (2.0 MPa), RuCl<sub>2</sub>(PPh<sub>3</sub>)<sub>3</sub> (1 mol%), **L3** (1.2 mol%), *t*BuOK (10 mol%), 1,4-dioxane (2.0 mL), T °C for 24 h. Yield of **1b** and the ratio of **1b/1c** were detected by GC analysis with *n*-cetane as the internal standard.

**Table S6.** Screening the loading of catalyst. <sup>[a]</sup>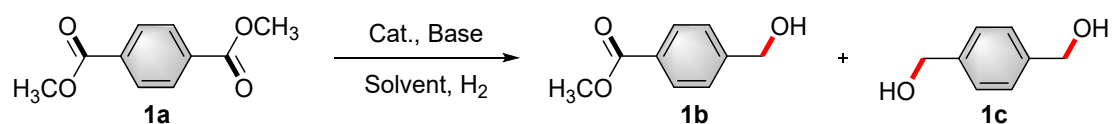

| Entry    | RuCl <sub>2</sub> (PPh <sub>3</sub> ) <sub>3</sub> (mol%) | <b>L3</b> (mol%) | Yield <b>1b</b> (%) | <b>1b/1c</b> |
|----------|-----------------------------------------------------------|------------------|---------------------|--------------|
| 1        | 0                                                         | 0                | 0                   | -            |
| 2        | 0.1                                                       | 0.12             | 24                  | 19:1         |
| 3        | 0.25                                                      | 0.3              | 55                  | 17:1         |
| 4        | 0.5                                                       | 0.6              | 74                  | 14:1         |
| <b>5</b> | <b>1.0</b>                                                | <b>1.2</b>       | <b>83</b>           | <b>12:1</b>  |
| 6        | 2.0                                                       | 2.4              | 77                  | 5:1          |

[a] Reaction conditions: **1a** (0.5 mmol), H<sub>2</sub> (2.0 MPa), RuCl<sub>2</sub>(PPh<sub>3</sub>)<sub>3</sub> (x mol%), **L3** (1.2x mol%), <sup>t</sup>BuOK (10 mol%), 1,4-dioxane (2.0 mL), 110 °C for 24 h. Yield of **1b** and the ratio of **1b/1c** were detected by GC analysis with *n*-cetane as the internal standard.



**Table S7.** Screening of different catalyst. <sup>[a]</sup>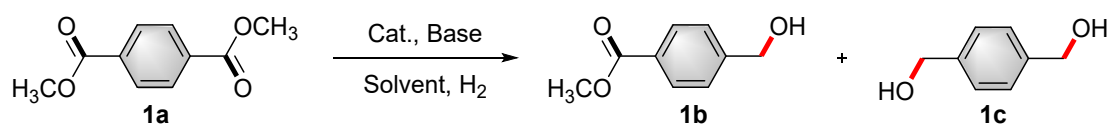

| Entry     | [Cat.]                                               | <b>1b</b> | <b>1b/1c</b> |
|-----------|------------------------------------------------------|-----------|--------------|
| 1         | FeCl <sub>2</sub>                                    | 0         | -            |
| 2         | FeBr <sub>2</sub>                                    | 0         | -            |
| 3         | Fe(OAc) <sub>2</sub>                                 | 0         | -            |
| 4         | CoCl <sub>2</sub>                                    | 0         | -            |
| 5         | Co(OAc) <sub>2</sub>                                 | 0         | -            |
| 6         | MnCl <sub>2</sub>                                    | 0         | -            |
| 7         | NiCl <sub>2</sub>                                    | 0         | -            |
| 8         | NiBr <sub>2</sub>                                    | 0         | -            |
| 9         | Ni(OAc) <sub>2</sub>                                 | 0         | -            |
| 10        | CuCl <sub>2</sub>                                    | 0         | -            |
| 11        | CuBr <sub>2</sub>                                    | 0         | -            |
| 12        | Cu(OAc) <sub>2</sub>                                 | 0         | -            |
| <b>13</b> | <b>RuCl<sub>2</sub>(PPh<sub>3</sub>)<sub>3</sub></b> | <b>83</b> | <b>11:1</b>  |
| 14        | RuCl <sub>3</sub>                                    | <5        | -            |
| 15        | -                                                    | 0         | -            |

[a] Reaction Conditions: **1a** (0.5 mmol), H<sub>2</sub> (2.0 MPa), [Cat.] (1.0 mol%), **L3** (1.2 mol%), <sup>t</sup>BuOK (10 mol%), 1,4-dioxane (2.0 mL), 110°C for 24 h. Yield of **1b** and the ratio of **1b/1c** were determined by GC analysis using *n*-cetane as the internal standard.

**Table S8.** Screening the time of hydrogenation reaction. [a]



| Entry    | t (h)    | Yield <b>1b</b> (%) | <b>1b/1c</b>    |
|----------|----------|---------------------|-----------------|
| 1        | 24       | 84                  | 12:1            |
| 2        | 12       | 85                  | 13:1            |
| 3        | 6        | 87                  | 16:1            |
| 4        | 4        | 90                  | 20:1            |
| <b>5</b> | <b>2</b> | <b>96</b>           | <b>&gt;20:1</b> |
| 6        | 1.5      | 70                  | >20:1           |
| 7        | 1        | 41                  | >20:1           |

[a] Reaction conditions: **1a** (0.5 mmol), H<sub>2</sub> (2.0 MPa), RuCl<sub>2</sub>(PPh<sub>3</sub>)<sub>3</sub> (1 mol%), **L3** (1.2 mol%), <sup>t</sup>BuOK (10 mol%), 1,4-dioxane (2.0 mL), 110 °C. Yield of **1b** and the ratio of **1b/1c** were detected by GC analysis with *n*-cetane as the internal standard.

#### 4. General procedure for the hydrogenation reaction

In a nitrogen-filled glove box, add a magnetic stirring bar, substrates **a** (0.5 mmol), <sup>t</sup>BuOK (0.05 mmol, 10 mol%), RuCl<sub>2</sub>(PPh<sub>3</sub>)<sub>3</sub> (1 mol%), **L3** (1.2 mol%), and 1,4-dioxane (2.0 mL) to a dried high-pressure reactor. After sealing, remove the high-pressure reactor from the glove box. Then the reactor was purged and charged with H<sub>2</sub> (2.0 MPa) and immersed into a pre-heated metal bath (110 °C) and stirred at 600 rpm. After design time the reaction was cooled, release H<sub>2</sub> from the reactor. Then quenched with saturated brine (100 μL) and DCM, and dried with Na<sub>2</sub>SO<sub>4</sub>. A small aliquot of the organic phase was analyzed by GC or GC-MS to monitor product formation. Then the solvent was evaporated under reduced pressure and the residue was purified by flash column chromatography (petroleum ether/ethyl acetate = 20:1 – 2:1) on silica gel to give the corresponding product.

## 5. Characterization data

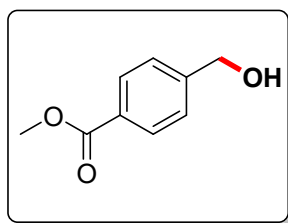

### methyl 4-(hydroxymethyl)benzoate (1b, 65b)<sup>6</sup>

The title compound was prepared according to the general procedure and purified by column chromatography to give the white solid 80 mg, 96% yield. Purification by column chromatography on silica gel (petroleum ether/ethyl acetate = 20:1 – 2:1).

**<sup>1</sup>H NMR** (400 MHz, CDCl<sub>3</sub>) δ 7.98 (d, *J* = 8.0 Hz, 2H), 7.39 (d, *J* = 8.0 Hz, 2H), 4.72 (s, 2H), 3.89 (s, 3H), 2.56 (s, 1H) ppm.

**<sup>13</sup>C NMR** (101 MHz, CDCl<sub>3</sub>) δ 167.1, 146.1, 129.8, 129.2, 126.5, 64.6, 52.1 ppm.

**HRMS** (ESI) calcd for C<sub>9</sub>H<sub>11</sub>O<sub>3</sub> [M+H]: 167.0708, found: 167.0711.

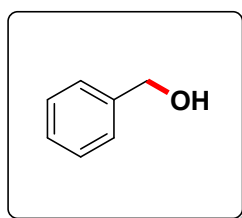

### benzyl alcohol (2b, 12b)<sup>7</sup>

The title compound was prepared according to the general procedure and purified by column chromatography to give the colorless oil 50 mg, 92% yield. Purification by column chromatography on silica gel (petroleum ether/ethyl acetate = 20:1 – 2:1).

**<sup>1</sup>H NMR** (400 MHz, CDCl<sub>3</sub>) δ 7.43 – 7.25 (m, 5H), 4.68 (s, 2H), 2.19 – 1.91 (b, 1H) ppm.

**<sup>13</sup>C NMR** (101 MHz, CDCl<sub>3</sub>) δ 140.9, 128.6, 127.6, 127.0, 65.2 ppm.

**HRMS** (ESI) calcd for C<sub>7</sub>H<sub>9</sub>O [M+H]: 109.0653, found: 109.0655.

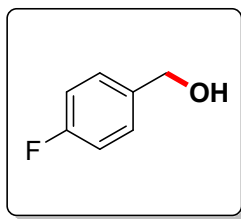

**(4-fluorophenyl)methanol (3b)<sup>6</sup>**

The title compound was prepared according to the general procedure and purified by column chromatography to give the colorless oil 59 mg, 94% yield. Purification by column chromatography on silica gel (petroleum ether/ethyl acetate = 20:1 – 2:1).

**<sup>1</sup>H NMR** (400 MHz, CDCl<sub>3</sub>) δ 7.36 – 7.25 (m, 2H), 7.04 (t, *J* = 8.8 Hz, 2H), 4.60 (s, 2H), 2.78 – 2.59 (b, 1H) ppm.

**<sup>13</sup>C NMR** (101 MHz, CDCl<sub>3</sub>) δ 163.5, 161.1, 136.6, 136.5, 128.8, 128.7, 115.5, 115.2, 64.4, 64.4 ppm.

**<sup>19</sup>F NMR** (376 MHz, CDCl<sub>3</sub>) δ -114.9 ppm.

**HRMS** (ESI) calcd for C<sub>7</sub>H<sub>8</sub>FO [M+H]: 127.0558, found: 127.0560.

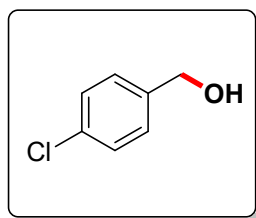

**(4-chlorophenyl)methanol (4b, 18b)<sup>7</sup>**

The title compound was prepared according to the general procedure and purified by column chromatography to give the white solid 65 mg, 91% yield. Purification by column chromatography on silica gel (petroleum ether/ethyl acetate = 20:1 – 2:1).

**<sup>1</sup>H NMR** (400 MHz, CDCl<sub>3</sub>) δ 7.30 (d, *J* = 8.4 Hz, 2H), 7.24 (d, *J* = 8.4 Hz, 2H), 4.59 (s, 2H), 2.54 (s, 1H) ppm.

**<sup>13</sup>C NMR** (101 MHz, CDCl<sub>3</sub>) δ 139.2, 133.3, 128.7, 128.3, 64.4 ppm.

**HRMS** (ESI) calcd for C<sub>7</sub>H<sub>8</sub>ClO [M+H]: 143.0264, found: 143.0268.

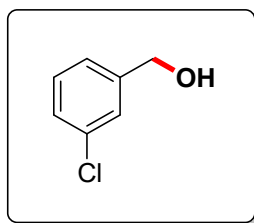

**(3-chlorophenyl)methanol (5b)<sup>6</sup>**

The title compound was prepared according to the general procedure and purified by column chromatography to give the colorless oil 62 mg, 87% yield. Purification by column chromatography on silica gel (petroleum ether/ethyl acetate = 20:1 – 2:1).

**<sup>1</sup>H NMR** (400 MHz, CDCl<sub>3</sub>) δ 7.38 (s, 1H), 7.33 – 7.21 (m, 3H), 4.68 (s, 2H), 2.05 (s, 1H) ppm.

**<sup>13</sup>C NMR** (101 MHz, CDCl<sub>3</sub>) δ 142.8, 134.4, 129.8, 127.7, 127.0, 124.9, 64.5 ppm.

**HRMS** (ESI) calcd for C<sub>7</sub>H<sub>8</sub>ClO [M+H]: 143.0264, found: 143.0266.

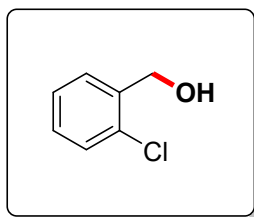

**(2-chlorophenyl)methanol (6b)<sup>6</sup>**

The title compound was prepared according to the general procedure and purified by column chromatography to give the white solid 58 mg, 82% yield. Purification by column chromatography on silica gel (petroleum ether/ethyl acetate = 20:1 – 2:1).

**<sup>1</sup>H NMR** (400 MHz, CDCl<sub>3</sub>) δ 7.45 (d, *J* = 7.2 Hz, 1H), 7.34 (d, *J* = 7.6 Hz, 1H), 7.29 – 7.16 (m, 2H), 4.74 (s, 2H), 2.44 (s, 1H) ppm.

**<sup>13</sup>C NMR** (101 MHz, CDCl<sub>3</sub>) δ 138.2, 132.7, 129.4, 128.8, 128.7, 127.0, 62.8 ppm.

**HRMS** (ESI) calcd for C<sub>7</sub>H<sub>8</sub>ClO [M+H]: 143.0264, found: 143.0261.

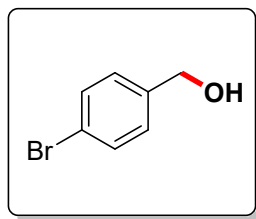

**(4-bromophenyl)methanol (7b)**<sup>7</sup>

The title compound was prepared according to the general procedure and purified by column chromatography to give the white solid 76 mg, 81% yield. Purification by column chromatography on silica gel (petroleum ether/ethyl acetate = 20:1 – 2:1).

**<sup>1</sup>H NMR** (500 MHz, CDCl<sub>3</sub>) δ 7.46 (d, *J* = 8.0 Hz, 2H), 7.20 (d, *J* = 8.0 Hz, 2H), 4.61 (d, *J* = 5.2 Hz, 2H), 2.16 (s, 1H) ppm.

**<sup>13</sup>C NMR** (126 MHz, CDCl<sub>3</sub>) δ 139.9, 131.7, 128.7, 121.5, 64.6 ppm.

**HRMS** (ESI) calcd for C<sub>7</sub>H<sub>8</sub>BrO [M+H]: 186.9760, found: 186.9759.

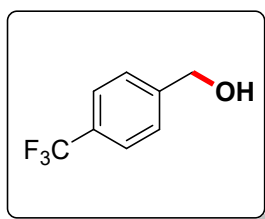

**(4-(trifluoromethyl)phenyl)methanol (8b, 21b)**<sup>7</sup>

The title compound was prepared according to the general procedure and purified by column chromatography to give the colorless oil 86 mg, 98% yield. Purification by column chromatography on silica gel (petroleum ether/ethyl acetate = 20:1 – 2:1).

**<sup>1</sup>H NMR** (400 MHz, CDCl<sub>3</sub>) δ 7.59 (d, *J* = 8.0 Hz, 2H), 7.42 (d, *J* = 8.0 Hz, 2H), 4.70 (s, 2H), 2.67 – 2.54 (b, 1H) ppm.

**<sup>13</sup>C NMR** (101 MHz, CDCl<sub>3</sub>) δ 144.7, 130.2, 129.9, 129.6, 129.3, 128.2, 126.8, 125.5, 125.5, 125.4, 125.4, 125.4, 122.8, 120.1, 64.3 ppm.

**<sup>19</sup>F NMR** (376 MHz, CDCl<sub>3</sub>) δ -62.5 ppm.

**HRMS** (ESI) calcd for C<sub>8</sub>H<sub>8</sub>F<sub>3</sub>O [M+H]: 177.0528, found: 177.0524.

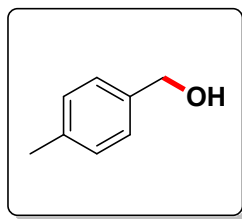

#### 4-methylbenzyl alcohol (9b, 13b)<sup>6</sup>

The title compound was prepared according to the general procedure and purified by column chromatography to give the white solid 51 mg, 83% yield. Purification by column chromatography on silica gel (petroleum ether/ethyl acetate = 20:1 – 2:1).

**<sup>1</sup>H NMR** (400 MHz, CDCl<sub>3</sub>) δ 7.28 – 7.24 (m, 2H), 7.17 (d, *J* = 8.0 Hz, 2H), 4.65 (s, 2H), 2.35 (s, 3H), 1.61 (s, 1H) ppm.

**<sup>13</sup>C NMR** (101 MHz, CDCl<sub>3</sub>) δ 137.9, 137.3, 129.2, 127.1, 65.0, 21.1.

**HRMS** (ESI) calcd for C<sub>8</sub>H<sub>11</sub>O [M+H]: 123.0810, found: 123.0808.

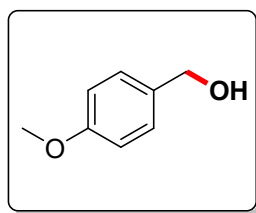

#### (4-methoxyphenyl)methanol (10b)<sup>7</sup>

The title compound was prepared according to the general procedure and purified by column chromatography to give the colorless oil 53 mg, 77% yield. Purification by column chromatography on silica gel (petroleum ether/ethyl acetate = 20:1 – 2:1).

**<sup>1</sup>H NMR** (400 MHz, CDCl<sub>3</sub>) δ 7.28 (d, *J* = 8.8 Hz, 2H), 6.90 (d, *J* = 8.8 Hz, 2H), 4.59 (s, 2H), 3.81 (s, 3H), 2.22 (s, 1H) ppm.

**<sup>13</sup>C NMR** (101 MHz, CDCl<sub>3</sub>) δ 159.1, 133.1, 128.6, 113.9, 64.9, 55.3 ppm.

**HRMS** (ESI) calcd for C<sub>8</sub>H<sub>11</sub>O<sub>2</sub> [M+H]: 139.0757, found: 139.0760.



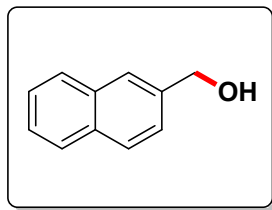

### naphthalen-2-ylmethanol (11b, 23b)<sup>6</sup>

The title compound was prepared according to the general procedure and purified by column chromatography to give the white solid 66 mg, 84% yield. Purification by column chromatography on silica gel (petroleum ether/ethyl acetate = 20:1 – 2:1).

<sup>1</sup>H NMR (400 MHz, CDCl<sub>3</sub>) δ 7.90 – 7.73 (m, 4H), 7.55 – 7.41 (m, 3H), 4.79 (s, 2H), 2.56 (s, 1H) ppm.

<sup>13</sup>C NMR (101 MHz, CDCl<sub>3</sub>) δ 138.4, 133.4, 133.0, 128.3, 128.0, 127.8, 126.2, 125.9, 125.5, 125.2, 65.3 ppm.

HRMS (ESI) calcd for C<sub>11</sub>H<sub>11</sub>O [M+H]: 159.0810, found: 159.0811.

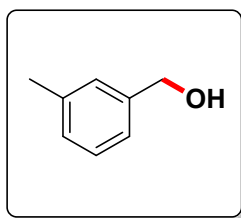

### 3-methylbenzyl alcohol (14b)<sup>8</sup>

The title compound was prepared according to the general procedure and purified by column chromatography to give the colorless oil 56 mg, 92% yield. Purification by column chromatography on silica gel (petroleum ether/ethyl acetate = 20:1 – 2:1).

<sup>1</sup>H NMR (400 MHz, CDCl<sub>3</sub>) δ 7.26 (t, *J* = 7.6 Hz, 1H), 7.20 – 7.10 (m, 3H), 4.63 (s, 2H), 2.37 (s, 3H), 2.13 (s, 1H) ppm.

<sup>13</sup>C NMR (101 MHz, CDCl<sub>3</sub>) δ 140.8, 138.2, 128.5, 128.4, 127.8, 124.1, 65.3, 21.4 ppm.

HRMS (ESI) calcd for C<sub>8</sub>H<sub>11</sub>O [M+H]: 123.0810, found: 123.0813.

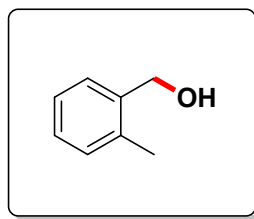

### 2-methylbenzyl alcohol (15b)<sup>7</sup>

The title compound was prepared according to the general procedure and purified by column chromatography to give the white solid 60 mg, 98% yield. Purification by column chromatography on silica gel (petroleum ether/ethyl acetate = 20:1 – 2:1).

**<sup>1</sup>H NMR** (400 MHz, CDCl<sub>3</sub>) δ 7.33 – 7.28 (m, 1H), 7.22 – 7.11 (m, 3H), 4.61 (s, 2H), 2.31 (s, 3H), 2.13 (s, 1H) ppm.

**<sup>13</sup>C NMR** (101 MHz, CDCl<sub>3</sub>) δ 138.7, 136.1, 130.3, 127.7, 127.5, 126.0, 63.3, 18.6 ppm.

**HRMS** (ESI) calcd for C<sub>8</sub>H<sub>11</sub>O [M+H]: 123.0810, found: 123.0811.

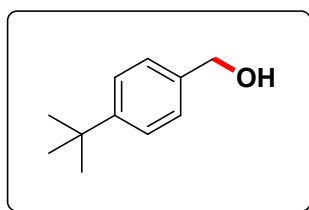

### (4-(tert-butyl)phenyl)methanol (16b)<sup>6</sup>

The title compound was prepared according to the general procedure and purified by column chromatography to give the colorless oil 77 mg, 94% yield. Purification by column chromatography on silica gel (petroleum ether/ethyl acetate = 20:1 – 2:1).

**<sup>1</sup>H NMR** (400 MHz, CDCl<sub>3</sub>) δ 7.40 (d, *J* = 8.4 Hz, 2H), 7.31 (d, *J* = 8.0 Hz, 2H), 4.66 (s, 2H), 1.75 (s, 1H), 1.34 (s, 9H) ppm.

**<sup>13</sup>C NMR** (101 MHz, CDCl<sub>3</sub>) δ 150.8, 138.1, 127.0, 125.6, 65.3, 34.7, 31.5 ppm.

**HRMS** (ESI) calcd for C<sub>11</sub>H<sub>17</sub>O [M+H]: 165.1281, found: 165.1285.

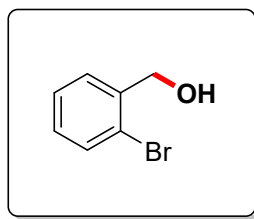

**(2-bromophenyl)methanol (19b)<sup>8</sup>**

The title compound was prepared according to the general procedure and purified by column chromatography to give the white solid 80 mg, 86% yield. Purification by column chromatography on silica gel (petroleum ether/ethyl acetate = 20:1 – 2:1).

**<sup>1</sup>H NMR** (400 MHz, CDCl<sub>3</sub>) δ 7.54 (dd, *J* = 8.0, 1.2 Hz, 1H), 7.47 (dd, *J* = 7.6, 1.6 Hz, 1H), 7.32 (td, *J* = 7.6, 1.2 Hz, 1H), 7.16 (td, *J* = 7.6, 2.0 Hz, 1H), 4.73 (s, 2H), 2.22 (s, 1H) ppm.

**<sup>13</sup>C NMR** (101 MHz, CDCl<sub>3</sub>) δ 139.7, 132.5, 129.0, 128.8, 127.6, 122.5, 64.9 ppm.

**HRMS** (ESI) calcd for C<sub>7</sub>H<sub>8</sub>BrO [M+H]: 186.9760, found: 186.9758.

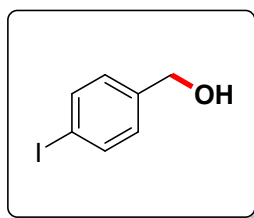

**(4-iodophenyl)methanol (20b)<sup>7</sup>**

The title compound was prepared according to the general procedure and purified by column chromatography to give the white solid 95 mg, 81% yield. Purification by column chromatography on silica gel (petroleum ether/ethyl acetate = 20:1 – 2:1).

**<sup>1</sup>H NMR** (400 MHz, CDCl<sub>3</sub>) δ 7.66 (d, *J* = 8.4 Hz, 2H), 7.07 (d, *J* = 8.4 Hz, 2H), 4.59 (s, 2H), 2.19 (s, 1H) ppm.

**<sup>13</sup>C NMR** (101 MHz, CDCl<sub>3</sub>) δ 140.4, 137.5, 128.8, 93.0, 64.5 ppm.

**HRMS** (ESI) calcd for C<sub>7</sub>H<sub>8</sub>IO [M+H]: 234.9618, found: 234.9620.

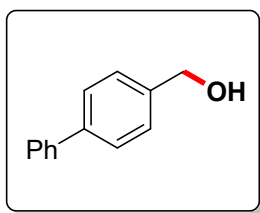

#### 4-biphenylmethanol (22b)<sup>6</sup>

The title compound was prepared according to the general procedure and purified by column chromatography to give the white solid 79 mg, 86% yield. Purification by column chromatography on silica gel (petroleum ether/ethyl acetate = 20:1 – 2:1).

<sup>1</sup>H NMR (400 MHz, CDCl<sub>3</sub>) δ 7.61 (d, *J* = 8.0 Hz, 4H), 7.48 – 7.42 (m, 4H), 7.37 (t, *J* = 7.2 Hz, 1H), 4.74 (s, 2H), 1.97 (s, 1H) ppm.

<sup>13</sup>C NMR (101 MHz, CDCl<sub>3</sub>) δ 140.9, 140.7, 140.0, 128.9, 127.6, 127.4, 127.2, 65.1 ppm.

HRMS (ESI) calcd for C<sub>13</sub>H<sub>13</sub>O [M+H]: 185.0968, found: 185.0971.

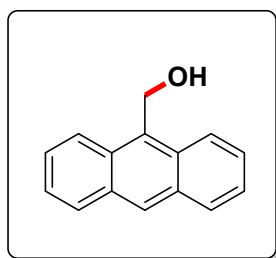

#### anthracen-9-ylmethanol (24b)<sup>9</sup>

The title compound was prepared according to the general procedure and purified by column chromatography to give the white solid 91 mg, 87% yield. Purification by column chromatography on silica gel (petroleum ether/ethyl acetate = 20:1 – 2:1).

<sup>1</sup>H NMR (400 MHz, CDCl<sub>3</sub>) δ 8.46 (s, 1H), 8.40 (d, *J* = 8.8 Hz, 2H), 8.03 (d, *J* = 8.0 Hz, 2H), 7.63 – 7.54 (m, 2H), 7.52 – 7.45 (m, 2H), 5.65 (s, 2H), 1.75 (s, 1H) ppm.

<sup>13</sup>C NMR (101 MHz, CDCl<sub>3</sub>) δ 131.6, 131.0, 130.3, 129.2, 128.4, 126.5, 125.1, 123.9, 57.4 ppm.

HRMS (ESI) calcd for C<sub>15</sub>H<sub>13</sub>O [M+H]: 209.0967, found: 209.0965.

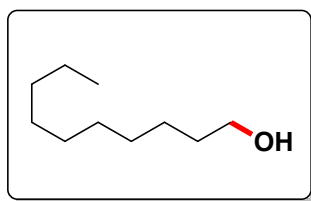

**decan-1-ol (25b)<sup>8</sup>**

The title compound was prepared according to the general procedure and purified by column chromatography to give the colorless oil 76 mg, 96% yield. Purification by column chromatography on silica gel (petroleum ether).

**<sup>1</sup>H NMR** (400 MHz, CDCl<sub>3</sub>) δ 3.63 (t, *J* = 6.8 Hz, 2H), 1.71 (m, 1H), 1.56 (m, 2H), 1.38 – 1.23 (m, 14H), 0.87 (t, *J* = 6.8 Hz, 3H) ppm.

**<sup>13</sup>C NMR** (101 MHz, CDCl<sub>3</sub>) δ 63.1, 32.8, 31.9, 29.6, 29.6, 29.4, 29.3, 25.7, 22.7, 14.1 ppm.

**HRMS** (ESI) calcd for C<sub>10</sub>H<sub>23</sub>O [M+H]: 159.1748, found: 159.1745.

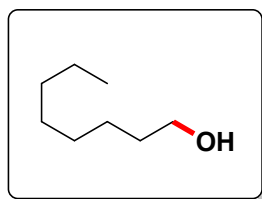

**octan-1-ol (26b)<sup>10</sup>**

The title compound was prepared according to the general procedure and purified by column chromatography to give the colorless oil 61 mg, 94% yield. Purification by column chromatography on silica gel (petroleum ether).

**<sup>1</sup>H NMR** (400 MHz, CDCl<sub>3</sub>) δ 3.64 (t, *J* = 6.8 Hz, 2H), 1.62 – 1.50 (m, 3H), 1.38 – 1.21 (m, 10H), 0.92 – 0.84 (m, 3H) ppm.

**<sup>13</sup>C NMR** (101 MHz, CDCl<sub>3</sub>) δ 63.1, 32.8, 31.8, 29.4, 29.3, 25.7, 22.7, 14.1 ppm.

**HRMS** (ESI) calcd for C<sub>8</sub>H<sub>19</sub>O [M+H]: 131.1439, found: 131.1441.

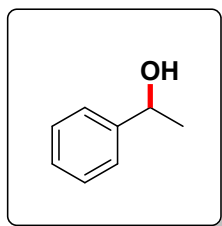

### 1-phenylethanol (27b)<sup>11</sup>

The title compound was prepared according to the general procedure and purified by column chromatography to give the colorless oil 60 mg, 99% yield. Purification by column chromatography on silica gel (petroleum ether/ethyl acetate = 20:1 – 2:1).

**<sup>1</sup>H NMR** (400 MHz, CDCl<sub>3</sub>) δ 7.43 – 7.27 (m, 5H), 4.91 (q, *J* = 6.4 Hz, 1H), 2.29 (s, 1H), 1.52 (d, *J* = 6.4 Hz, 3H) ppm.

**<sup>13</sup>C NMR** (101 MHz, CDCl<sub>3</sub>) δ 145.8, 128.5, 127.4, 125.4, 70.3, 25.1 ppm.

**HRMS** (ESI) calcd for C<sub>8</sub>H<sub>11</sub>O [M+H]: 123.0810, found: 123.0808.

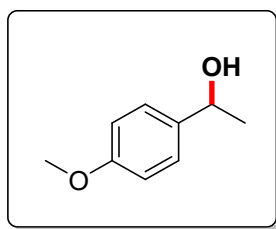

### 1-(4-methoxyphenyl)ethanol (28b)<sup>11</sup>

The title compound was prepared according to the general procedure and purified by column chromatography to give the colorless oil 71 mg, 93% yield. Purification by column chromatography on silica gel (petroleum ether/ethyl acetate = 20:1 – 2:1).

**<sup>1</sup>H NMR** (400 MHz, CDCl<sub>3</sub>) δ 7.30 (d, *J* = 8.4 Hz, 2H), 6.88 (d, *J* = 8.8 Hz, 2H), 4.85 (q, *J* = 6.4 Hz, 1H), 3.80 (s, 3H), 1.90 (s, 1H), 1.47 (d, *J* = 6.4 Hz, 3H) ppm.

**<sup>13</sup>C NMR** (101 MHz, CDCl<sub>3</sub>) δ 159.0, 138.1, 126.7, 113.9, 70.0, 55.4, 25.1 ppm.

**HRMS** (ESI) calcd for C<sub>9</sub>H<sub>13</sub>O<sub>2</sub> [M+H]: 153.0915, found: 153.0917.

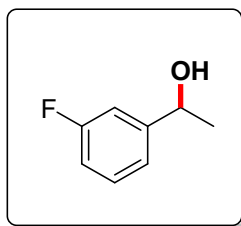

### 1-(3-fluorophenyl)ethanol (29b)<sup>12</sup>

The title compound was prepared according to the general procedure and purified by column chromatography to give the colorless oil 69 mg, 99% yield. Purification by column chromatography on silica gel (petroleum ether/ethyl acetate = 20:1 – 2:1).

**<sup>1</sup>H NMR** (400 MHz, CDCl<sub>3</sub>) δ 7.33 – 7.24 (m, 1H), 7.13 – 7.04 (m, 2H), 6.94 (m, 1H), 4.86 (q, *J* = 6.4 Hz, 1H), 2.32 (s, 1H), 1.46 (d, *J* = 6.4 Hz, 3H) ppm.

**<sup>13</sup>C NMR** (101 MHz, CDCl<sub>3</sub>) δ 163.01 (d, *J* = 245.8 Hz), 148.56 (d, *J* = 6.6 Hz), 130.00 (d, *J* = 8.1 Hz), 120.97 (d, *J* = 2.9 Hz), 114.21 (d, *J* = 21.2 Hz), 112.33 (d, *J* = 21.8 Hz), 69.78 (d, *J* = 1.8 Hz), 25.21 ppm.

**<sup>19</sup>F NMR** (376 MHz, CDCl<sub>3</sub>) δ -112.9 ppm.

**HRMS** (ESI) calcd for C<sub>8</sub>H<sub>10</sub>FO [M+H]: 141.0716, found: 141.0718.

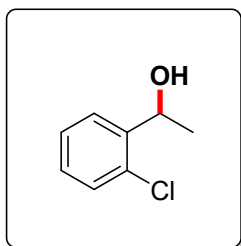

### 1-(2-chlorophenyl)ethanol (30b)<sup>11</sup>

The title compound was prepared according to the general procedure and purified by column chromatography to give the colorless oil 76 mg, 97% yield. Purification by column chromatography on silica gel (petroleum ether/ethyl acetate = 20:1 – 2:1).

**<sup>1</sup>H NMR** (400 MHz, CDCl<sub>3</sub>) δ 7.59 (d, *J* = 9.6 Hz, 1H), 7.34 – 7.27 (m, 2H), 7.20 (t, *J* = 7.6 Hz, 1H), 5.29 (q, *J* = 6.4 Hz, 1H), 2.11 (s, 1H), 1.49 (d, *J* = 6.4 Hz, 3H) ppm.

**<sup>13</sup>C NMR** (101 MHz, CDCl<sub>3</sub>) δ 143.2, 131.7, 129.5, 128.5, 127.3, 126.5, 67.1, 23.6.

**HRMS** (ESI) calcd for C<sub>8</sub>H<sub>10</sub>ClO [M+H]: 157.0420, found: 157.0423.

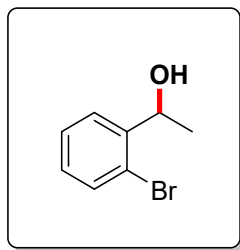

### 1-(2-bromophenyl)ethanol (31b)<sup>11</sup>

The title compound was prepared according to the general procedure and purified by column chromatography to give the colorless oil 93 mg, 93% yield. Purification by column chromatography on silica gel (petroleum ether/ethyl acetate = 20:1 – 2:1).

**<sup>1</sup>H NMR** (400 MHz, CDCl<sub>3</sub>) δ 7.51 (m, 2H), 7.30 (t, *J* = 7.6 Hz, 1H), 7.12 – 7.05 (m, 1H), 5.18 (q, *J* = 6.4 Hz, 1H), 3.11 (s, 1H), 1.42 (d, *J* = 6.4 Hz, 3H) ppm.

**<sup>13</sup>C NMR** (101 MHz, CDCl<sub>3</sub>) δ 144.6, 132.5, 128.6, 127.8, 126.6, 121.5, 69.0, 23.5 ppm.

**HRMS** (ESI) calcd for C<sub>8</sub>H<sub>10</sub>BrO [M+H]: 200.9915, found: 200.9917.

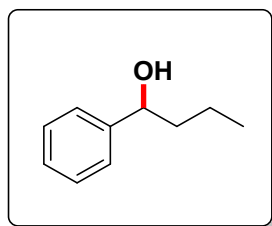

### 1-phenyl-1-butanol (32b)<sup>13</sup>

The title compound was prepared according to the general procedure and purified by column chromatography to give the colorless oil 74 mg, 99% yield. Purification by column chromatography on silica gel (petroleum ether/ethyl acetate = 20:1 – 2:1).

**<sup>1</sup>H NMR** (400 MHz, CDCl<sub>3</sub>) δ 7.36 (d, *J* = 4.4 Hz, 4H), 7.31 – 7.25 (m, 1H), 4.68 (dd, *J* = 7.6, 6.0 Hz, 1H), 1.90 (s, 1H), 1.87 – 1.63 (m, 2H), 1.52 – 1.25 (m, 2H), 0.94 (t, *J* = 7.6 Hz, 3H) ppm.

**<sup>13</sup>C NMR** (101 MHz, CDCl<sub>3</sub>) δ 145.1, 128.6, 127.6, 126.0, 74.6, 41.4, 19.2, 14.1 ppm.

**HRMS** (ESI) calcd for C<sub>10</sub>H<sub>15</sub>O [M+H]: 151.1123, found: 151.1121.



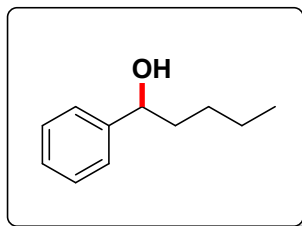

### 1-Phenylpentan-1-ol (33b)<sup>13</sup>

The title compound was prepared according to the general procedure and purified by column chromatography to give the colorless oil 81 mg, 99% yield. Purification by column chromatography on silica gel (petroleum ether/ethyl acetate = 20:1 – 2:1).

**<sup>1</sup>H NMR** (400 MHz, CDCl<sub>3</sub>) δ 7.34 (d, *J* = 4.0 Hz, 4H), 7.30 – 7.24 (m, 1H), 4.65 (t, *J* = 5.6 Hz, 1H), 1.91 (s, 1H), 1.87 – 1.63 (m, 2H), 1.45 – 1.19 (m, 4H), 0.88 (t, *J* = 7.2 Hz, 3H) ppm.

**<sup>13</sup>C NMR** (101 MHz, CDCl<sub>3</sub>) δ 145.0, 128.5, 127.5, 126.0, 74.7, 38.9, 28.0, 22.7, 14.1 ppm.

**HRMS** (ESI) calcd for C<sub>11</sub>H<sub>17</sub>O [M+H]: 165.1279, found: 165.1283.

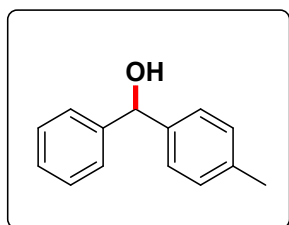

### 4-methylbenzhydrol (34b)<sup>14</sup>

The title compound was prepared according to the general procedure and purified by column chromatography to give the white solid 96 mg, 97% yield. Purification by column chromatography on silica gel (petroleum ether/ethyl acetate = 20:1 – 2:1).

**<sup>1</sup>H NMR** (400 MHz, CDCl<sub>3</sub>) δ 7.42 – 7.32 (m, 4H), 7.28 (d, *J* = 7.2 Hz, 3H), 7.16 (d, *J* = 8.0 Hz, 2H), 5.82 (s, 1H), 2.35 (s, 3H), 2.25 (s, 1H) ppm.

**<sup>13</sup>C NMR** (101 MHz, CDCl<sub>3</sub>) δ 144.1, 141.1, 137.4, 129.3, 128.6, 127.6, 126.6, 126.6, 76.2, 21.2 ppm.

**HRMS** (ESI) calcd for C<sub>14</sub>H<sub>15</sub>O [M+H]: 199.1123, found: 199.1126.

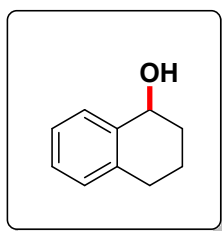

### 1,2,3,4-tetrahydronaphthalen-1-ol (35b)<sup>11</sup>

The title compound was prepared according to the general procedure and purified by column chromatography to give the yellow oil 72 mg, 97% yield. Purification by column chromatography on silica gel (petroleum ether/ethyl acetate = 20:1 – 2:1).

**<sup>1</sup>H NMR** (400 MHz, CDCl<sub>3</sub>) δ 7.46 – 7.41 (m, 1H), 7.24 – 7.17 (m, 2H), 7.14 – 7.08 (m, 1H), 4.78 (s, 1H), 2.87 – 2.80 (m, 1H), 2.78 – 2.69 (m, 1H), 2.04 – 1.71 (m, 5H) ppm.

**<sup>13</sup>C NMR** (101 MHz, CDCl<sub>3</sub>) δ 138.9, 137.2, 129.1, 128.8, 127.7, 126.3, 68.2, 32.4, 29.3, 18.9 ppm.

**HRMS** (ESI) calcd for C<sub>10</sub>H<sub>13</sub>O [M+H]: 149.0966, found: 149.0963.

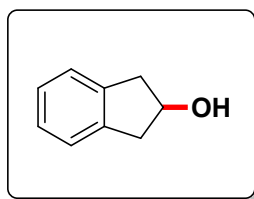

### indan-2-ol (36b)<sup>15</sup>

The title compound was prepared according to the general procedure and purified by column chromatography to give the white solid 66 mg, 99% yield. Purification by column chromatography on silica gel (petroleum ether/ethyl acetate = 20:1 – 2:1).

**<sup>1</sup>H NMR** (400 MHz, CDCl<sub>3</sub>) δ 7.32 – 7.27 (m, 2H), 7.25 – 7.20 (m, 2H), 4.76 – 4.71 (m, 1H), 3.26 (dd, *J* = 16.4, 6.0 Hz, 2H), 2.96 (dd, *J* = 16.4, 3.2 Hz, 2H), 1.91 (s, 1H) ppm.

**<sup>13</sup>C NMR** (101 MHz, CDCl<sub>3</sub>) δ 140.9, 126.8, 125.1, 73.3, 42.8 ppm.

**HRMS** (ESI) calcd for C<sub>9</sub>H<sub>11</sub>O [M+H]: 135.0810, found: 135.0807.

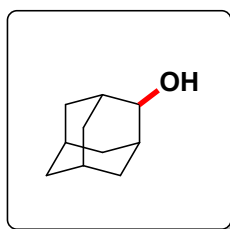

**1-adamantanol (37b)<sup>10</sup>**

The title compound was prepared according to the general procedure and purified by column chromatography to give the white solid 75 mg, 99% yield. Purification by column chromatography on silica gel (petroleum ether/ethyl acetate = 20:1 – 2:1).

**<sup>1</sup>H NMR** (400 MHz, CDCl<sub>3</sub>) δ 3.86 (s, 1H), 2.06 (d, *J* = 12.8 Hz, 2H), 1.90 – 1.77 (m, 6H), 1.69 (d, *J* = 12.8 Hz, 5H), 1.52 (d, *J* = 10.0 Hz, 2H) ppm.

**<sup>13</sup>C NMR** (101 MHz, CDCl<sub>3</sub>) δ 74.7, 37.7, 36.7, 34.7, 31.2, 27.7, 27.2 ppm.

**HRMS** (ESI) calcd for C<sub>10</sub>H<sub>17</sub>O [M+H]: 153.1279, found: 153.1283.

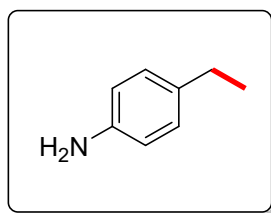

**4-ethylaniline (38b)<sup>16</sup>**

The title compound was prepared according to the general procedure and purified by column chromatography to give the yellow oil 58 mg, 96% yield. Purification by column chromatography on silica gel (petroleum ether).

**<sup>1</sup>H NMR** (400 MHz, CDCl<sub>3</sub>) δ 7.04 (d, *J* = 8.4 Hz, 2H), 6.67 (d, *J* = 8.4 Hz, 2H), 3.56 (s, 2H), 2.59 (q, *J* = 7.6 Hz, 2H), 1.23 (t, *J* = 7.6 Hz, 3H) ppm.

**<sup>13</sup>C NMR** (101 MHz, CDCl<sub>3</sub>) δ 144.0, 134.6, 128.7, 115.4, 28.0, 16.0 ppm.

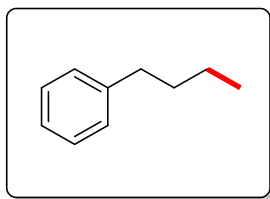

**butylbenzene (39b)<sup>17</sup>**

The title compound was prepared according to the general procedure and purified by column chromatography to give the colorless oil 54 mg, 80% yield. Purification by column chromatography on silica gel (petroleum ether).

**<sup>1</sup>H NMR** (400 MHz, CDCl<sub>3</sub>) δ 7.41 – 7.32 (m, 2H), 7.30 – 7.22 (m, 3H), 2.75 – 2.66 (m, 2H), 1.77 – 1.63 (m, 2H), 1.53 – 1.38 (m, 2H), 1.08 – 0.98 (m, 3H) ppm.

**<sup>13</sup>C NMR** (101 MHz, CDCl<sub>3</sub>) δ 143.0, 128.5, 128.3, 125.6, 35.8, 33.8, 22.5, 14.0 ppm.

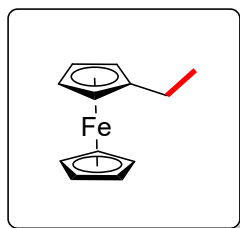

**ethylferrocene (40b)<sup>18</sup>**

The title compound was prepared according to the general procedure and purified by column chromatography to give the orange oil 97 mg, 91% yield. Purification by column chromatography on silica gel (petroleum ether).

**<sup>1</sup>H NMR** (400 MHz, CDCl<sub>3</sub>) δ 4.27 (d, *J* = 18.8 Hz, 9H), 2.24 (d, *J* = 7.6 Hz, 2H), 1.09 (t, *J* = 6.8 Hz, 3H) ppm.

**<sup>13</sup>C NMR** (101 MHz, CDCl<sub>3</sub>) δ 93.2, 70.1, 68.9, 68.4, 22.3, 14.6 ppm.

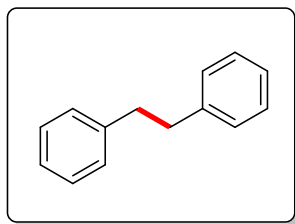

**1,2-diphenylethane (41b, 52b)<sup>16</sup>**

The title compound was prepared according to the general procedure and purified by column chromatography to give the white solid 86 mg, 94% yield. Purification by column chromatography on silica gel (petroleum ether).

**<sup>1</sup>H NMR** (400 MHz, CDCl<sub>3</sub>) δ 7.34 – 7.28 (m, 4H), 7.25 – 7.20 (m, 6H), 2.95 (s, 4H) ppm.

**<sup>13</sup>C NMR** (101 MHz, CDCl<sub>3</sub>) δ 141.8, 128.5, 128.4, 126.0, 38.0 ppm.

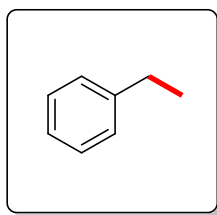

**ethylbenzene (42b)<sup>16</sup>**

The title compound was prepared according to the general procedure and purified by column chromatography to give the colorless oil 52 mg, 99% yield. Purification by column chromatography on silica gel (petroleum ether).

**<sup>1</sup>H NMR** (400 MHz, CDCl<sub>3</sub>) δ 7.44 – 7.26 (m, 5H), 2.82 – 2.73 (m, 2H), 1.40 – 1.33 (m, 3H) ppm.

**<sup>13</sup>C NMR** (101 MHz, CDCl<sub>3</sub>) δ 144.3, 128.4, 127.9, 125.7, 29.0, 15.7 ppm.

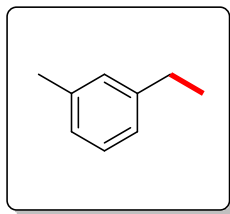

**1-ethyl-3-methylbenzene (43b)<sup>16</sup>**

The title compound was prepared according to the general procedure and purified by column chromatography to give the colorless oil 59 mg, 99% yield. Purification by column chromatography on silica gel (petroleum ether).

**<sup>1</sup>H NMR** (400 MHz, CDCl<sub>3</sub>) δ 7.27 (t, *J* = 7.2 Hz, 1H), 7.13 – 7.06 (m, 3H), 2.71 (q, *J* = 7.6 Hz, 2H), 2.42 (s, 3H), 1.32 (t, *J* = 7.6 Hz, 3H) ppm.

**<sup>13</sup>C NMR** (101 MHz, CDCl<sub>3</sub>) δ 144.3, 137.9, 128.8, 128.3, 126.4, 124.9, 28.9, 21.5, 15.7 ppm.

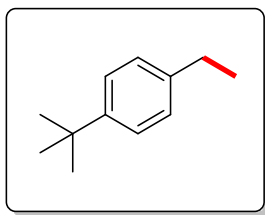

**1-(tert-butyl)-4-ethylbenzene (44b)<sup>16</sup>**

The title compound was prepared according to the general procedure and purified by column chromatography to give the colorless oil 79 mg, 97% yield. Purification by column chromatography on silica gel (petroleum ether).

**<sup>1</sup>H NMR** (400 MHz, CDCl<sub>3</sub>) δ 7.39 – 7.32 (m, 2H), 7.22 – 7.14 (m, 2H), 2.70 – 2.61 (m, 2H), 1.38 – 1.32 (m, 9H), 1.32 – 1.23 (m, 3H) ppm.

**<sup>13</sup>C NMR** (101 MHz, CDCl<sub>3</sub>) δ 148.4, 141.2, 127.5, 125.2, 34.4, 31.5, 28.3, 15.5 ppm.

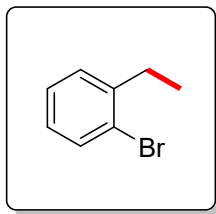

**1-bromo-2-ethylbenzene (45b)<sup>16</sup>**

The title compound was prepared according to the general procedure and purified by column chromatography to give the colorless oil 80 mg, 87% yield. Purification by column chromatography on silica gel (petroleum ether).

<sup>1</sup>H NMR (400 MHz, CDCl<sub>3</sub>) δ 7.57 (d, *J* = 7.6 Hz, 1H), 7.33 – 7.24 (m, 2H), 7.13 – 7.05 (m, 1H), 2.81 (q, *J* = 7.6 Hz, 2H), 1.28 (t, *J* = 7.6 Hz, 3H) ppm.

<sup>13</sup>C NMR (101 MHz, CDCl<sub>3</sub>) δ 143.3, 132.7, 129.5, 127.5, 127.4, 124.4, 29.4, 14.3 ppm.

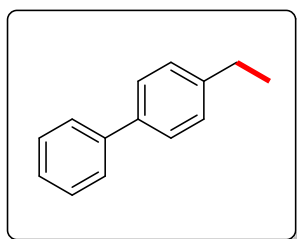

**4-ethyl-1,1'-biphenyl (46b)<sup>16</sup>**

The title compound was prepared according to the general procedure and purified by column chromatography to give the white solid 89 mg, 98% yield. Purification by column chromatography on silica gel (petroleum ether).

<sup>1</sup>H NMR (400 MHz, CDCl<sub>3</sub>) δ 7.60 (d, *J* = 6.8 Hz, 2H), 7.54 (d, *J* = 8.4 Hz, 2H), 7.44 (t, *J* = 7.6 Hz, 2H), 7.37 – 7.27 (m, 3H), 2.72 (q, *J* = 7.6 Hz, 2H), 1.30 (t, *J* = 7.6 Hz, 3H) ppm.

<sup>13</sup>C NMR (101 MHz, CDCl<sub>3</sub>) δ 143.4, 141.2, 138.6, 128.7, 128.3, 127.1, 127.0, 127.0, 28.5, 15.6 ppm.

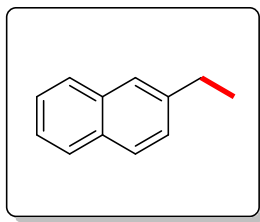

### 2-ethylnaphthalene (47b)<sup>19</sup>

The title compound was prepared according to the general procedure and purified by column chromatography to give the colorless oil 76 mg, 97% yield. Purification by column chromatography on silica gel (petroleum ether).

**<sup>1</sup>H NMR** (400 MHz, CDCl<sub>3</sub>) δ 7.89 – 7.79 (m, 3H), 7.68 (d, *J* = 4.4 Hz, 1H), 7.54 – 7.36 (m, 3H), 2.92 – 2.81 (m, 2H), 1.43 – 1.35 (m, 3H) ppm.

**<sup>13</sup>C NMR** (101 MHz, CDCl<sub>3</sub>) δ 141.8, 133.8, 132.0, 127.9, 127.7, 127.5, 127.2, 125.9, 125.6, 125.1, 29.1, 15.6 ppm.

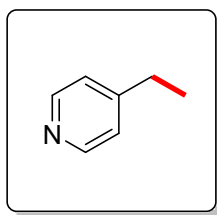

### 4-ethylpyridine (48b)<sup>20</sup>

The title compound was prepared according to the general procedure and purified by column chromatography to give the yellow oil 50 mg, 94% yield. Purification by column chromatography on silica gel (petroleum ether).

**<sup>1</sup>H NMR** (400 MHz, CDCl<sub>3</sub>) δ 8.46 – 8.39 (m, 2H), 7.07 – 7.04 (m, 2H), 2.62 – 2.55 (m, 2H), 1.21 – 1.16 (m, 3H) ppm.

**<sup>13</sup>C NMR** (101 MHz, CDCl<sub>3</sub>) δ 153.0, 149.5, 123.4, 28.1, 14.3 ppm.



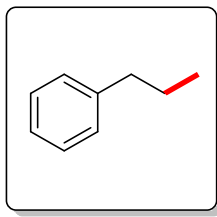

**propylbenzene (49b)<sup>21</sup>**

The title compound was prepared according to the general procedure and purified by column chromatography to give the colorless oil 58 mg, 97% yield. Purification by column chromatography on silica gel (petroleum ether).

**<sup>1</sup>H NMR** (400 MHz, CDCl<sub>3</sub>) δ 7.37 – 7.29 (m, 2H), 7.26 – 7.19 (m, 3H), 2.67 – 2.61 (m, 2H), 1.77 – 1.65 (m, 2H), 1.00 (t, *J* = 7.2 Hz, 3H) ppm.

**<sup>13</sup>C NMR** (101 MHz, CDCl<sub>3</sub>) δ 142.7, 128.5, 128.3, 125.7, 38.1, 24.7, 13.9 ppm.

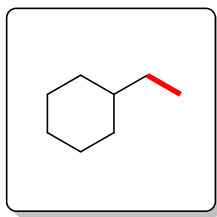

**ethylcyclohexane (50b)<sup>22</sup>**

The title compound was prepared according to the general procedure and purified by column chromatography to give the colorless oil 55 mg, 98% yield. Purification by column chromatography on silica gel (petroleum ether).

**<sup>1</sup>H NMR** (400 MHz, CDCl<sub>3</sub>) δ 1.74 – 1.60 (m, 5H), 1.29 – 1.03 (m, 6H), 0.86 (t, *J* = 7.4 Hz, 5H) ppm.

**<sup>13</sup>C NMR** (101 MHz, CDCl<sub>3</sub>) δ 39.5, 33.0, 30.1, 26.8, 26.5, 11.4 ppm.

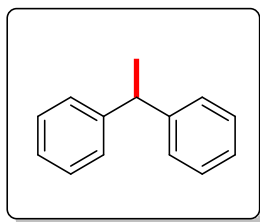

**1,1-diphenylethane (51b)<sup>23</sup>**

The title compound was prepared according to the general procedure and purified by column chromatography to give the colorless oil 87 mg, 95% yield. Purification by column chromatography on silica gel (petroleum ether).

**<sup>1</sup>H NMR** (400 MHz, CDCl<sub>3</sub>) δ 7.43 – 7.24 (m, 10H), 4.27 (q, *J* = 7.2 Hz, 1H), 1.76 (d, *J* = 7.2 Hz, 3H) ppm.

**<sup>13</sup>C NMR** (101 MHz, CDCl<sub>3</sub>) δ 146.5, 128.5, 127.7, 126.1, 44.9, 22.0 ppm.

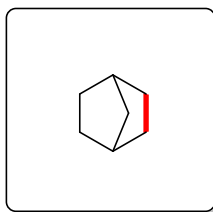

**norbornane (53b)<sup>24</sup>**

The title compound was prepared according to the general procedure and purified by column chromatography to give the colorless solid 47 mg, 99% yield. Purification by column chromatography on silica gel (petroleum ether).

**<sup>1</sup>H NMR** (400 MHz, CDCl<sub>3</sub>) δ 2.22 – 2.16 (m, 2H), 1.52 – 1.37 (m, 4H), 1.24 – 1.07 (m, 6H) ppm.

**<sup>13</sup>C NMR** (101 MHz, CDCl<sub>3</sub>) δ 38.4, 36.4, 29.7 ppm.

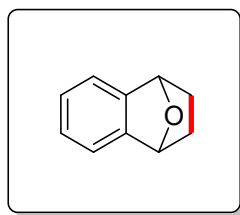

**1,2,3,4-tetrahydro-1,4-epoxynaphthalene (54b)<sup>25</sup>**

The title compound was prepared according to the general procedure and purified by column chromatography to give the yellow oil 72 mg, 98% yield. Purification by column chromatography on silica gel (petroleum ether/ethyl acetate = 20:1 – 2:1).

**<sup>1</sup>H NMR** (400 MHz, CDCl<sub>3</sub>) δ 7.17 – 7.10 (m, 2H), 7.06 (dd, *J* = 5.2, 3.2 Hz, 2H), 5.31 (dd, *J* = 3.2, 2.0 Hz, 2H), 2.03 – 1.91 (m, 2H), 1.36 – 1.22 (m, 2H) ppm.

**<sup>13</sup>C NMR** (101 MHz, CDCl<sub>3</sub>) δ 145.7, 126.5, 118.7, 78.9, 26.6 ppm.

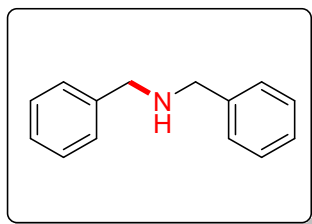

**dibenzylamine (55b)<sup>26</sup>**

The title compound was prepared according to the general procedure and purified by column chromatography to give the colorless oil 97 mg, 98% yield. Purification by column chromatography on silica gel (petroleum ether/ethyl acetate = 20:1 – 2:1).

**<sup>1</sup>H NMR** (400 MHz, CDCl<sub>3</sub>) δ 7.37 – 7.29 (m, 8H), 7.27 – 7.21 (m, 2H), 3.80 (s, 4H), 1.70 (s, 1H) ppm.

**<sup>13</sup>C NMR** (101 MHz, CDCl<sub>3</sub>) δ 140.4, 128.5, 128.2, 127.0, 53.2 ppm.

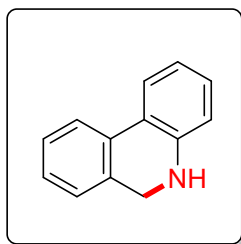

### 5,6-dihydrophenanthridine (56b)<sup>27</sup>

The title compound was prepared according to the general procedure and purified by column chromatography to give the white solid 81 mg, 89% yield. Purification by column chromatography on silica gel (petroleum ether/ethyl acetate = 20:1 – 2:1).

<sup>1</sup>H NMR (400 MHz, CDCl<sub>3</sub>) δ 7.66 (dd, *J* = 8.0, 3.6 Hz, 2H), 7.28 (t, *J* = 7.6 Hz, 1H), 7.18 (t, *J* = 7.2 Hz, 1H), 7.07 (d, *J* = 8.0 Hz, 2H), 6.81 (t, *J* = 7.6 Hz, 1H), 6.61 (d, *J* = 8.0 Hz, 1H), 4.33 (s, 2H), 3.57 (s, 1H) ppm.

<sup>13</sup>C NMR (101 MHz, CDCl<sub>3</sub>) δ 145.8, 132.8, 132.1, 128.9, 127.7, 127.2, 126.1, 123.6, 122.5, 122.1, 119.3, 115.2, 46.4 ppm.

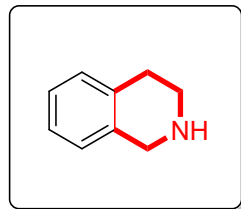

### 1,2,3,4-tetrahydroisoquinoline (57b)<sup>28</sup>

The title compound was prepared according to the general procedure and purified by column chromatography to give the yellow oil 47 mg, 70% yield. Purification by column chromatography on silica gel (petroleum ether/ethyl acetate = 20:1 – 2:1).

<sup>1</sup>H NMR (400 MHz, CDCl<sub>3</sub>) δ 7.19 – 7.05 (m, 3H), 7.04 – 6.96 (m, 1H), 4.01 (s, 2H), 3.13 (t, *J* = 6.0 Hz, 2H), 2.79 (t, *J* = 6.0 Hz, 2H), 1.84 (s, 1H) ppm.

<sup>13</sup>C NMR (101 MHz, CDCl<sub>3</sub>) δ 136.0, 134.8, 129.4, 126.2, 126.0, 125.7, 48.4, 44.0, 29.2 ppm.

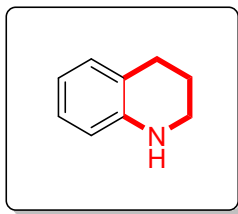

**1,2,3,4-tetrahydroquinoline (58b)<sup>28</sup>**

The title compound was prepared according to the general procedure and purified by column chromatography to give the yellow oil 62 mg, 93% yield. Purification by column chromatography on silica gel (petroleum ether/ethyl acetate = 20:1 – 2:1).

**<sup>1</sup>H NMR** (400 MHz, CDCl<sub>3</sub>) δ 7.04 – 6.96 (m, 2H), 6.65 (t, *J* = 7.6 Hz, 1H), 6.51 (d, *J* = 8.0 Hz, 1H), 3.73 (s, 1H), 3.37 – 3.26 (m, 2H), 2.80 (t, *J* = 6.4 Hz, 2H), 2.03 – 1.93 (m, 2H) ppm.

**<sup>13</sup>C NMR** (101 MHz, CDCl<sub>3</sub>) δ 144.8, 129.6, 126.8, 121.5, 117.0, 114.3, 42.0, 27.0, 22.2 ppm.

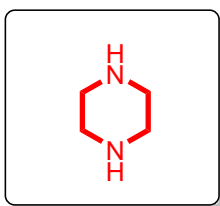

**piperazine (59b)<sup>28</sup>**

The title compound was prepared according to the general procedure and purified by column chromatography to give the yellow solid 40 mg, 93% yield. Purification by column chromatography on silica gel (petroleum ether/ethyl acetate = 20:1 – 2:1).

**<sup>1</sup>H NMR** (400 MHz, CDCl<sub>3</sub>) δ 2.83 (s, 8H), 1.91 (d, *J* = 4.4 Hz, 2H) ppm.

**<sup>13</sup>C NMR** (101 MHz, CDCl<sub>3</sub>) δ 47.2 ppm.

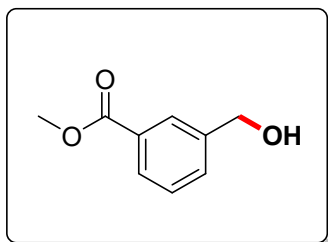

**methyl 3-(hydroxymethyl)benzoate (60b)<sup>29</sup>**

The title compound was prepared according to the general procedure and purified by column chromatography to give the white solid 67 mg, 81% yield. Purification by column chromatography on silica gel (petroleum ether/ethyl acetate = 20:1 – 2:1).

**<sup>1</sup>H NMR** (400 MHz, CDCl<sub>3</sub>) δ 8.02 (s, 1H), 7.94 (d, *J* = 7.6 Hz, 1H), 7.56 (d, *J* = 7.6 Hz, 1H), 7.42 (t, *J* = 7.6 Hz, 1H), 4.73 (s, 2H), 3.91 (s, 3H), 2.03 (s, 1H) ppm.

**<sup>13</sup>C NMR** (101 MHz, CDCl<sub>3</sub>) δ 167.1, 141.3, 131.4, 130.3, 128.8, 128.6, 127.9, 64.7, 52.2 ppm.

**HRMS** (ESI) calcd for C<sub>9</sub>H<sub>11</sub>O<sub>3</sub> [M+H]: 167.0708, found: 167.0712.

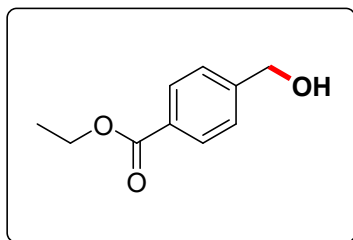

**ethyl 4-(hydroxymethyl)benzoate (62b)<sup>30</sup>**

The title compound was prepared according to the general procedure and purified by column chromatography to give the white solid 77 mg, 85% yield. Purification by column chromatography on silica gel (petroleum ether/ethyl acetate = 20:1 – 2:1).

**<sup>1</sup>H NMR** (400 MHz, CDCl<sub>3</sub>) δ 7.99 (d, *J* = 8.4 Hz, 2H), 7.39 (d, *J* = 8.0 Hz, 2H), 4.73 (s, 2H), 4.35 (q, *J* = 7.2 Hz, 2H), 2.48 (s, 1H), 1.38 (t, *J* = 7.2 Hz, 3H) ppm.

**<sup>13</sup>C NMR** (101 MHz, CDCl<sub>3</sub>) δ 166.6, 146.0, 129.8, 129.5, 126.4, 64.6, 61.0, 14.3 ppm.

**HRMS** (ESI) calcd for C<sub>10</sub>H<sub>13</sub>O<sub>3</sub> [M+H]: 181.0865, found: 181.0868.

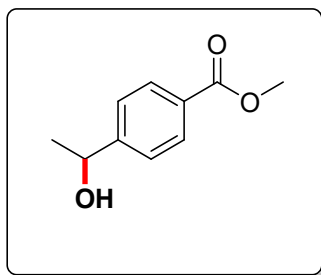

**methyl 4-(1-hydroxyethyl)benzoate (64b)<sup>31</sup>**

The title compound was prepared according to the general procedure and purified by column chromatography to give the white solid 80 mg, 89% yield. Purification by column chromatography on silica gel (petroleum ether/ethyl acetate = 20:1 – 2:1).

**<sup>1</sup>H NMR** (400 MHz, CDCl<sub>3</sub>) δ 7.98 (d, *J* = 8.4 Hz, 2H), 7.41 (d, *J* = 7.2 Hz, 2H), 4.93 (q, *J* = 6.4 Hz, 1H), 3.89 (s, 3H), 2.21 (s, 1H), 1.48 (d, *J* = 6.4 Hz, 3H) ppm.

**<sup>13</sup>C NMR** (101 MHz, CDCl<sub>3</sub>) δ 167.0, 151.0, 129.8, 129.1, 125.3, 69.9, 52.1, 25.3 ppm.

**HRMS** (ESI) calcd for C<sub>10</sub>H<sub>13</sub>O<sub>3</sub> [M+H]: 181.0865, found: 181.0866.

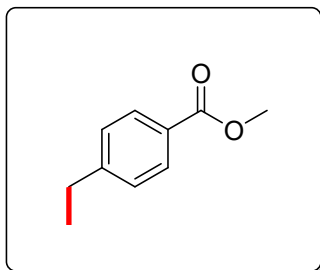

**methyl 4-ethylbenzoate (66b)<sup>32</sup>**

The title compound was prepared according to the general procedure and purified by column chromatography to give the colorless oil 50 mg, 61% yield. Purification by column chromatography on silica gel (petroleum ether/ethyl acetate = 20:1 – 2:1).

**<sup>1</sup>H NMR** (400 MHz, CDCl<sub>3</sub>) δ 7.98 (d, *J* = 8.4 Hz, 2H), 7.28 (d, *J* = 8.4 Hz, 2H), 3.92 (s, 3H), 2.72 (q, *J* = 7.6 Hz, 2H), 1.27 (t, *J* = 7.6 Hz, 3H) ppm.

**<sup>13</sup>C NMR** (101 MHz, CDCl<sub>3</sub>) δ 167.2, 149.8, 129.7, 127.9, 127.6, 51.9, 29.0, 15.2 ppm.

**HRMS** (ESI) calcd for C<sub>10</sub>H<sub>13</sub>O<sub>2</sub> [M+H]: 165.0916, found: 165.0921.

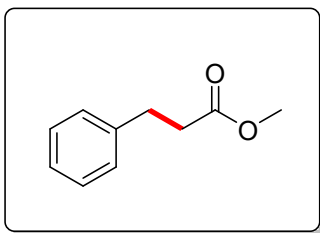

**methyl 3-phenylpropanoate (67b, 89b)<sup>33</sup>**

The title compound was prepared according to the general procedure and purified by column chromatography to give the colorless oil 80 mg, 98% yield. Purification by column chromatography on silica gel (petroleum ether/ethyl acetate = 20:1 – 2:1).

**<sup>1</sup>H NMR** (400 MHz, CDCl<sub>3</sub>) δ 7.35 – 7.27 (m, 2H), 7.26 – 7.18 (m, 3H), 3.68 (s, 3H), 2.97 (t, *J* = 8.0 Hz, 2H), 2.65 (t, *J* = 8.0 Hz, 2H) ppm.

**<sup>13</sup>C NMR** (101 MHz, CDCl<sub>3</sub>) δ 173.4, 140.5, 128.5, 128.3, 126.3, 51.6, 35.7, 31.0 ppm.

**HRMS** (ESI) calcd for C<sub>10</sub>H<sub>13</sub>O<sub>2</sub> [M+H]: 165.0916, found: 165.0916.

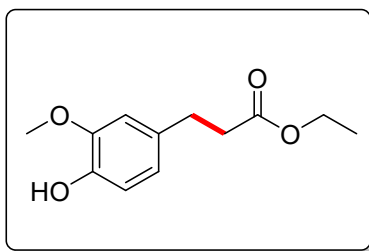

**ethyl 3-(4-hydroxy-3-methoxyphenyl)propanoate (68b)<sup>34</sup>**

The title compound was prepared according to the general procedure and purified by column chromatography to give the colorless oil 110 mg, 98% yield. Purification by column chromatography on silica gel (petroleum ether/ethyl acetate = 20:1 – 2:1).

**<sup>1</sup>H NMR** (400 MHz, CDCl<sub>3</sub>) δ 6.82 (d, *J* = 8.0 Hz, 1H), 6.73 – 6.65 (m, 2H), 5.66 (s, 1H), 4.12 (q, *J* = 7.2 Hz, 2H), 3.85 (s, 3H), 2.87 (t, *J* = 8.0 Hz, 2H), 2.59 (dd, *J* = 8.4, 7.2 Hz, 2H), 1.23 (t, *J* = 7.2 Hz, 3H) ppm.

**<sup>13</sup>C NMR** (101 MHz, CDCl<sub>3</sub>) δ 173.1, 146.5, 144.0, 132.5, 120.8, 114.4, 111.0, 60.4, 55.8, 36.4, 30.7, 14.2 ppm.

**HRMS** (ESI) calcd for C<sub>12</sub>H<sub>17</sub>O<sub>4</sub> [M+H]: 225.1127, found: 225.1126.



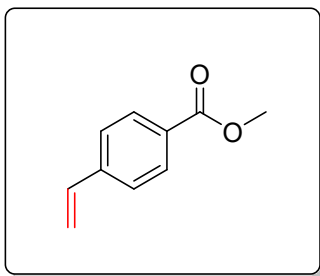

**ethyl 3-(4-hydroxy-3-methoxyphenyl)propanoate (69b)<sup>35</sup>**

The title compound was prepared according to the general procedure and purified by column chromatography to give the white solid 33 mg, 41% yield. Purification by column chromatography on silica gel (petroleum ether/ethyl acetate = 20:1 – 2:1).

**<sup>1</sup>H NMR** (400 MHz, CDCl<sub>3</sub>) δ 7.99 (d, *J* = 8.4 Hz, 2H), 7.46 (d, *J* = 8.4 Hz, 2H), 6.75 (dd, *J* = 17.6, 10.8 Hz, 1H), 5.86 (d, *J* = 16.8 Hz, 1H), 5.38 (d, *J* = 10.0 Hz, 1H), 3.91 (s, 3H) ppm.

**<sup>13</sup>C NMR** (101 MHz, CDCl<sub>3</sub>) δ 166.9, 141.9, 136.0, 129.9, 129.3, 126.1, 116.5, 52.1.

**HRMS** (ESI) calcd for C<sub>10</sub>H<sub>11</sub>O<sub>2</sub> [M+H]: 163.0759, found: 163.0763.

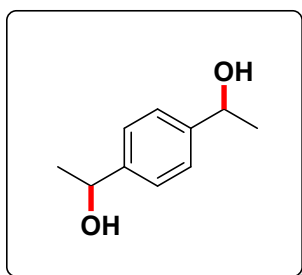

**1,1'-(1,4-phenylene)bis(ethan-1-ol) (73b)<sup>36</sup>**

The title compound was prepared according to the general procedure and purified by column chromatography to give the white solid 80 mg, 96% yield. Purification by column chromatography on silica gel (petroleum ether/ethyl acetate = 20:1 – 2:1).

**<sup>1</sup>H NMR** (400 MHz, CDCl<sub>3</sub>) δ 7.35 (s, 4H), 4.89 (q, *J* = 6.4 Hz, 2H), 1.87 (s, 2H), 1.49 (d, *J* = 6.4 Hz, 6H) ppm.

**<sup>13</sup>C NMR** (101 MHz, CDCl<sub>3</sub>) δ 145.1, 125.6, 70.2, 25.2 ppm.

**HRMS** (ESI) calcd for C<sub>10</sub>H<sub>15</sub>O<sub>2</sub> [M+H]: 167.1073, found: 167.1070.

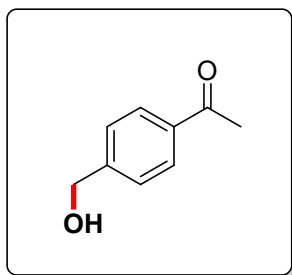

**1-(4-(hydroxymethyl)phenyl)ethan-1-one (74b)<sup>37</sup>**

The title compound was prepared according to the general procedure and purified by column chromatography to give the white solid 62 mg, 82% yield. Purification by column chromatography on silica gel (petroleum ether/ethyl acetate = 20:1 – 2:1).

**<sup>1</sup>H NMR** (400 MHz, CDCl<sub>3</sub>) δ 7.91 (d, *J* = 8.4 Hz, 2H), 7.43 (d, *J* = 8.0 Hz, 2H), 4.75 (s, 2H), 2.57 (s, 3H), 2.43 (s, 1H) ppm.

**<sup>13</sup>C NMR** (101 MHz, CDCl<sub>3</sub>) δ 198.2, 146.4, 136.2, 128.6, 126.6, 64.5, 26.7 ppm.

**HRMS** (ESI) calcd for C<sub>9</sub>H<sub>11</sub>O<sub>2</sub> [M+H]: 151.0759, found: 151.0757.

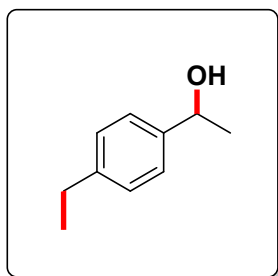

**1-(4-ethylphenyl)ethan-1-ol (75b)<sup>31</sup>**

The title compound was prepared according to the general procedure and purified by column chromatography to give the colorless oil 74 mg, 99% yield. Purification by column chromatography on silica gel (petroleum ether/ethyl acetate = 20:1 – 2:1).

**<sup>1</sup>H NMR** (400 MHz, CDCl<sub>3</sub>) δ 7.30 (d, *J* = 8.0 Hz, 2H), 7.19 (d, *J* = 8.0 Hz, 2H), 4.88 (q, *J* = 6.4 Hz, 1H), 2.65 (q, *J* = 7.6 Hz, 2H), 1.78 (s, 1H), 1.49 (d, *J* = 6.4 Hz, 3H), 1.24 (t, *J* = 7.6 Hz, 3H) ppm.

**<sup>13</sup>C NMR** (101 MHz, CDCl<sub>3</sub>) δ 143.6, 143.1, 128.0, 125.5, 70.3, 28.5, 25.0, 15.6 ppm.

**HRMS** (ESI) calcd for C<sub>10</sub>H<sub>15</sub>O [M+H]: 151.1123, found: 151.1128.

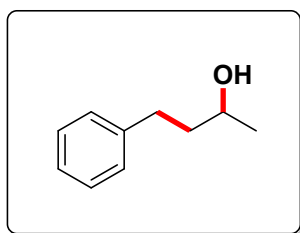

#### 4-phenylbutan-2-ol (76b)<sup>14</sup>

The title compound was prepared according to the general procedure and purified by column chromatography to give the colorless oil 65 mg, 87% yield. Purification by column chromatography on silica gel (petroleum ether/ethyl acetate = 20:1 – 2:1).

**<sup>1</sup>H NMR** (400 MHz, CDCl<sub>3</sub>) δ 7.34 – 7.28 (m, 2H), 7.26 – 7.16 (m, 3H), 3.90 – 3.78 (m, 1H), 2.84 – 2.63 (m, 2H), 1.96 (s, 1H), 1.88 – 1.71 (m, 2H), 1.25 (d, *J* = 6.4 Hz, 3H) ppm.

**<sup>13</sup>C NMR** (101 MHz, CDCl<sub>3</sub>) δ 142.1, 128.4, 125.9, 67.5, 40.9, 32.2, 23.6 ppm.

**HRMS** (ESI) calcd for C<sub>10</sub>H<sub>15</sub>O [M+H]: 151.1123, found: 151.1122.

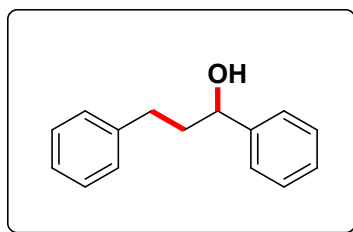

#### 1,3-diphenylpropan-1-ol (77b)<sup>14</sup>

The title compound was prepared according to the general procedure and purified by column chromatography to give the colorless oil 93 mg, 88% yield. Purification by column chromatography on silica gel (petroleum ether/ethyl acetate = 20:1 – 2:1).

**<sup>1</sup>H NMR** (400 MHz, CDCl<sub>3</sub>) δ 7.38 (d, *J* = 5.2 Hz, 4H), 7.34 – 7.27 (m, 3H), 7.25 – 7.17 (m, 3H), 4.70 (dd, *J* = 7.6, 5.2 Hz, 1H), 2.85 – 2.58 (m, 2H), 2.22 – 1.98 (m, 3H) ppm.

**<sup>13</sup>C NMR** (101 MHz, CDCl<sub>3</sub>) δ 144.58, 141.82, 128.56, 128.49, 128.44, 127.69, 125.99, 125.91, 73.93, 40.48, 32.09 ppm.

**HRMS** (ESI) calcd for C<sub>15</sub>H<sub>17</sub>O [M+H]: 213.1279, found: 213.1282.

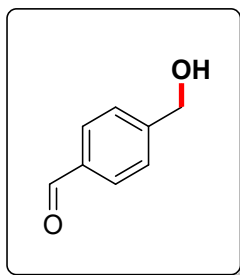

#### 4-(hydroxymethyl)benzaldehyde (82b)<sup>6</sup>

The title compound was prepared according to the general procedure and purified by column chromatography to give the yellow oil 60 mg, 88% yield. Purification by column chromatography on silica gel (petroleum ether/ethyl acetate = 20:1 – 2:1).

**<sup>1</sup>H NMR** (400 MHz, CDCl<sub>3</sub>) δ 9.97 (s, 1H), 7.85 (d, *J* = 8.4 Hz, 2H), 7.51 (d, *J* = 8.0 Hz, 2H), 4.78 (s, 2H), 2.27 (s, 1H) ppm.

**<sup>13</sup>C NMR** (101 MHz, CDCl<sub>3</sub>) δ 192.2, 147.9, 135.6, 130.0, 127.0, 64.5 ppm.

**HRMS** (ESI) calcd for C<sub>8</sub>H<sub>9</sub>O<sub>2</sub> [M+H]: 137.0603, found: 137.0605.

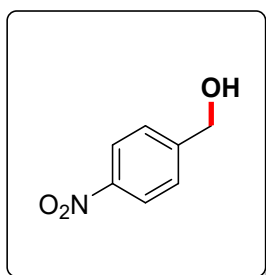

#### (4-nitrophenyl)methanol (83b)<sup>7</sup>

The title compound was prepared according to the general procedure and purified by column chromatography to give the yellow solid 61 mg, 80% yield. Purification by column chromatography on silica gel (petroleum ether/ethyl acetate = 20:1 – 2:1).

**<sup>1</sup>H NMR** (400 MHz, CDCl<sub>3</sub>) δ 8.22 (d, *J* = 8.8 Hz, 2H), 7.53 (d, *J* = 8.4 Hz, 2H), 4.84 (s, 2H), 1.99 (s, 1H) ppm.

**<sup>13</sup>C NMR** (101 MHz, CDCl<sub>3</sub>) δ 148.1, 127.0, 123.8, 64.0 ppm.

**HRMS** (ESI) calcd for C<sub>7</sub>H<sub>8</sub>NO<sub>3</sub> [M+H]: 154.0504, found: 154.0506.

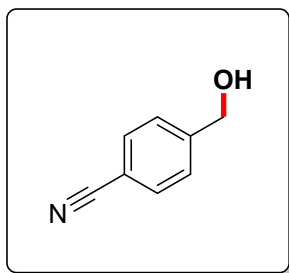

**4-(hydroxymethyl)benzonitrile (84b)<sup>40</sup>**

The title compound was prepared according to the general procedure and purified by column chromatography to give the white solid 37 mg, 56% yield. Purification by column chromatography on silica gel (petroleum ether/ethyl acetate = 20:1 – 2:1).

**<sup>1</sup>H NMR** (400 MHz, CDCl<sub>3</sub>) δ 7.64 (d, *J* = 8.4 Hz, 2H), 7.47 (d, *J* = 8.4 Hz, 2H), 4.78 (s, 2H), 2.03 (s, 1H) ppm.

**<sup>13</sup>C NMR** (101 MHz, CDCl<sub>3</sub>) δ 146.2, 132.3, 127.0, 118.9, 111.2, 64.2 ppm.

**HRMS** (ESI) calcd for C<sub>8</sub>H<sub>8</sub>NO [M+H]: 134.0606, found: 134.0610.

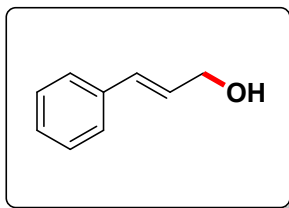

**Cinnamyl alcohol (85b)<sup>7</sup>**

The title compound was prepared according to the general procedure and purified by column chromatography to give the white solid 39 mg, 58% yield. Purification by column chromatography on silica gel (petroleum ether/ethyl acetate = 20:1 – 2:1).

**<sup>1</sup>H NMR** (400 MHz, CDCl<sub>3</sub>) δ 7.41 – 7.37 (m, 2H), 7.35 – 7.30 (m, 2H), 7.28 – 7.21 (m, 1H), 6.62 (d, *J* = 16.0 Hz, 1H), 6.46 – 6.25 (m, 1H), 4.33 (d, *J* = 5.6 Hz, 2H), 1.65 (s, 1H) ppm.

**<sup>13</sup>C NMR** (101 MHz, CDCl<sub>3</sub>) δ 136.7, 131.2, 128.6, 128.5, 127.7, 126.5, 63.8 ppm.

**HRMS** (ESI) calcd for C<sub>9</sub>H<sub>11</sub>O [M+H]: 135.0810, found: 135.0807.

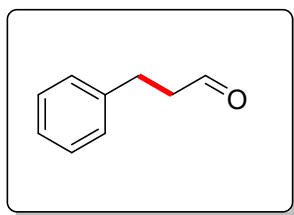

### 3-phenylpropanal (86b)<sup>38</sup>

The title compound was prepared according to the general procedure and purified by column chromatography to give the colorless oil 27 mg, 41% yield. Purification by column chromatography on silica gel (petroleum ether/ethyl acetate = 20:1 – 2:1).

**<sup>1</sup>H NMR** (400 MHz, CDCl<sub>3</sub>) δ 9.83 (s, 1H), 7.31 (t, *J* = 7.3 Hz, 2H), 7.26 – 7.17 (m, 3H), 2.97 (t, *J* = 7.5 Hz, 2H), 2.79 (t, *J* = 7.3 Hz, 2H) ppm.

**<sup>13</sup>C NMR** (101 MHz, CDCl<sub>3</sub>) δ 201.6, 140.4, 128.6, 128.3, 126.3, 45.3, 28.1 ppm.

**HRMS** (ESI) calcd for C<sub>9</sub>H<sub>10</sub>O [M+H]: 135.0810, found: 135.0812.

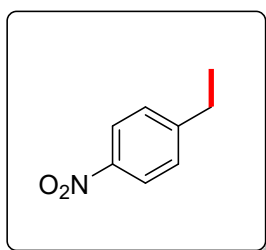

### 1-ethyl-4-nitrobenzene (87b)<sup>39</sup>

The title compound was prepared according to the general procedure and purified by column chromatography to give the yellow oil 32 mg, 42% yield. Purification by column chromatography on silica gel (petroleum ether).

**<sup>1</sup>H NMR** (400 MHz, CDCl<sub>3</sub>) δ 8.13 (d, *J* = 8.8 Hz, 2H), 7.34 (d, *J* = 8.8 Hz, 2H), 2.75 (q, *J* = 7.6 Hz, 2H), 1.28 (t, *J* = 7.6 Hz, 3H) ppm.

**<sup>13</sup>C NMR** (101 MHz, CDCl<sub>3</sub>) δ 152.0, 146.3, 128.7, 123.6, 28.9, 15.1 ppm.

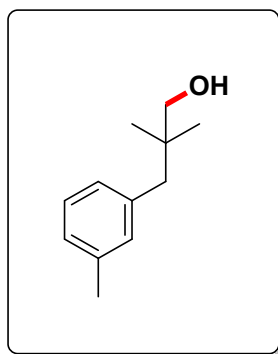

**Majantol (90b)<sup>5</sup>**

The title compound was prepared according to the general procedure and purified by column chromatography to give the colorless oil 80 mg, 90% yield. Purification by column chromatography on silica gel (petroleum ether/ethyl acetate = 20:1 – 2:1).

**<sup>1</sup>H NMR** (400 MHz, CDCl<sub>3</sub>) δ 7.18 (d, *J* = 7.6 Hz, 1H), 7.05 (d, *J* = 7.6 Hz, 1H), 6.99 (d, *J* = 8.0 Hz, 2H), 3.34 (s, 2H), 2.56 (s, 2H), 2.36 (s, 3H), 1.67 (s, 1H), 0.91 (s, 6H) ppm.

**<sup>13</sup>C NMR** (101 MHz, CDCl<sub>3</sub>) δ 138.8, 137.4, 131.3, 127.8, 127.6, 126.7, 71.3, 44.7, 36.4, 24.1, 21.5 ppm.

**HRMS** (ESI) calcd for C<sub>12</sub>H<sub>19</sub>O [M+H]: 179.1436, found: 179.1440.

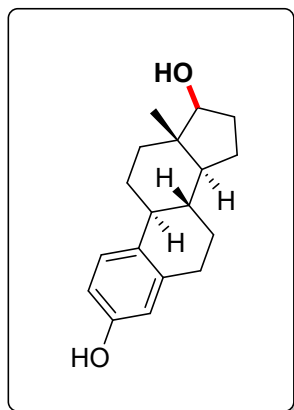

### Estradiol (91b)<sup>5</sup>

The title compound was prepared according to the general procedure and purified by column chromatography to give the white solid 114 mg, 84% yield. Purification by column chromatography on silica gel (petroleum ether/ethyl acetate = 20:1 – 2:1).

**<sup>1</sup>H NMR** (400 MHz, DMSO-*d*<sub>6</sub>)  $\delta$  8.96 (s, 1H), 7.05 (d, *J* = 8.8 Hz, 1H), 6.50 (dd, *J* = 8.4, 2.6 Hz, 1H), 6.43 (d, *J* = 2.8 Hz, 1H), 4.34 (d, *J* = 4.4 Hz, 1H), 3.61 – 3.54 (m, 1H), 2.80 – 2.63 (m, 2H), 2.31 – 2.22 (m, 1H), 2.11 – 1.98 (m, 2H), 1.85 – 1.64 (m, 3H), 1.61 – 1.49 (m, 1H), 1.46 – 1.06 (m, 6H), 0.61 (s, 3H) ppm.

**<sup>13</sup>C NMR** (101 MHz, DMSO-*d*<sub>6</sub>)  $\delta$  156.6, 138.8, 132.2, 127.8, 116.6, 114.4, 79.7, 48.9, 46.7, 45.4, 40.6, 33.8, 33.2, 31.0, 29.6, 27.8, 25.6, 18.7 ppm.

**HRMS** (ESI) calcd for C<sub>18</sub>H<sub>25</sub>O<sub>2</sub> [M+H]: 273.1855, found: 273.1852.



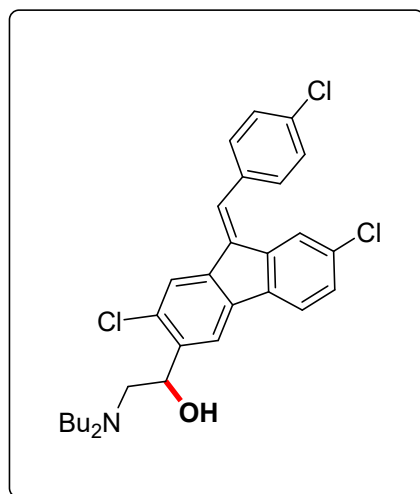

**Lumefantrine (92b)<sup>5</sup>**

The title compound was prepared according to the general procedure and purified by column chromatography to give the yellow solid 164 mg, 62% yield. Purification by column chromatography on silica gel (petroleum ether/ethyl acetate = 20:1 – 2:1).

**<sup>1</sup>H NMR** (400 MHz, CDCl<sub>3</sub>) δ 7.74 (d, *J* = 2.0 Hz, 1H), 7.68 (d, *J* = 2.0 Hz, 1H), 7.64 – 7.56 (m, 2H), 7.51 – 7.42 (m, 5H), 7.33 (dd, *J* = 8.3, 2.0 Hz, 1H), 5.36 (dd, *J* = 10.2, 3.5 Hz, 1H), 4.54 (s, 1H), 2.88 (dd, *J* = 13.0, 3.5 Hz, 1H), 2.75 – 2.63 (m, 2H), 2.58 – 2.40 (m, 3H), 1.56 – 1.45 (m, 4H), 1.43 – 1.28 (m, 4H), 0.97 (t, *J* = 7.3 Hz, 6H) ppm.

**<sup>13</sup>C NMR** (101 MHz, CDCl<sub>3</sub>) δ 141.6, 139.9, 138.3, 136.5, 135.0, 135.0, 134.7, 134.2, 133.2, 132.9, 130.6, 129.1, 128.4, 127.7, 126.4, 124.0, 123.1, 120.7, 65.5, 60.0, 53.4, 29.1, 20.7, 14.1 ppm.

**HRMS** (ESI) calcd for C<sub>30</sub>H<sub>33</sub>Cl<sub>3</sub>NO [M+H]: 529.1662, found: 529.1667.

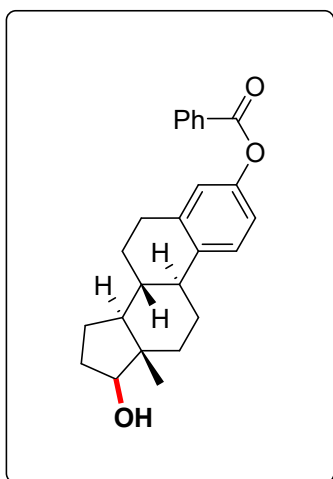

**Estradiol benzoate (93b)<sup>5</sup>**

The title compound was prepared according to the general procedure and purified by column chromatography to give the white solid 134 mg, 71% yield. Purification by column chromatography on silica gel (petroleum ether/ethyl acetate = 20:1 – 2:1).

<sup>1</sup>H NMR (400 MHz, CDCl<sub>3</sub>) δ 8.20 (dd, *J* = 8.4, 1.4 Hz, 2H), 7.63 (t, *J* = 7.6 Hz, 1H), 7.51 (t, *J* = 7.6 Hz, 2H), 7.34 (d, *J* = 8.8 Hz, 1H), 6.98 (dd, *J* = 8.4, 2.8 Hz, 1H), 6.93 (d, *J* = 2.4 Hz, 1H), 3.79 – 3.69 (m, 1H), 2.98 – 2.82 (m, 2H), 2.39 – 2.31 (m, 1H), 2.30 – 2.21 (m, 1H), 2.20 – 2.06 (m, 1H), 2.01 – 1.94 (m, 1H), 1.95 – 1.85 (m, 1H), 1.78 – 1.65 (m, 1H), 1.62 – 1.22 (m, 8H), 0.80 (s, 3H) ppm.

<sup>13</sup>C NMR (101 MHz, CDCl<sub>3</sub>) δ 165.5, 148.7, 138.4, 138.1, 133.5, 130.2, 129.8, 128.6, 126.5, 121.7, 118.7, 81.9, 50.1, 44.2, 43.3, 38.5, 36.7, 30.6, 29.6, 27.1, 26.2, 23.2, 11.1 ppm.

HRMS (ESI) calcd for C<sub>25</sub>H<sub>29</sub>O<sub>3</sub> [M+H]: 377.2117, found: 377.2113.

## 6. Gram scale experiments

### 6.1

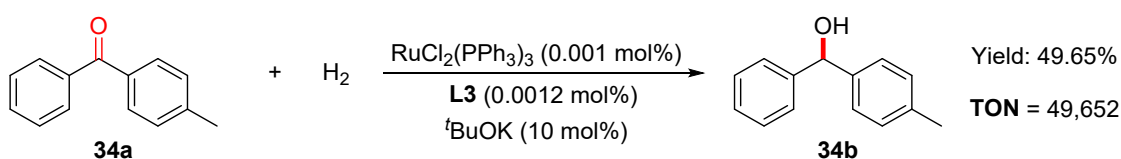

**10 mmol Scale:** In a nitrogen-filled glove box, add a magnetic stirring bar, 4-methylbenzophenone **34a** (10.0 mmol),  $t\text{BuOK}$  (1.0 mmol, 10 mol%),  $\text{RuCl}_2(\text{PPh}_3)_3$  (0.001 mol%), **L3** (0.0012 mol%), and 1,4-dioxane (20.0 mL) to a dried high-pressure reactor. After sealing, remove the high-pressure reactor from the glove box. Then the reactor was purged and charged with  $\text{H}_2$  (2.0 MPa) and immersed into a pre-heated metal bath (110°C). After 48 hours the reaction was cooled, release  $\text{H}_2$  from the reactor. Then quenched with saturated brine and DCM, and dried with  $\text{Na}_2\text{SO}_4$ . A small aliquot of the organic phase was analyzed by GC or GC-MS to monitor product formation. Then the solvent was evaporated under reduced pressure and the residue was purified by flash column chromatography (petroleum ether/ethyl acetate = 100:1 – 2:1) on silica gel to give the corresponding product **34b** in the 49.65% yield.

$$TON = \frac{N_s}{N_c} = \frac{984.4 \text{ mg}}{198.26 \text{ mg/mmol}} = 49,652$$

$N_s$ : The number of molecules of the substrate transformed in the reaction

$N_c$ : The number of active catalyst centers involved in the reaction

## 6.2

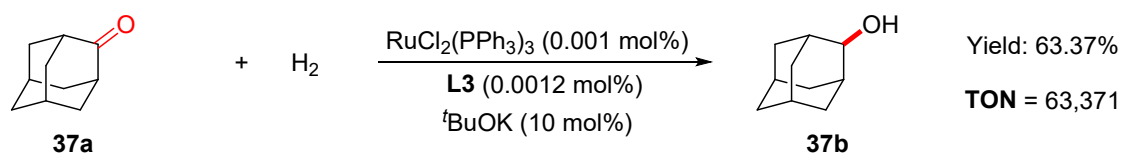

**10 mmol Scale:** In a nitrogen-filled glove box, add a magnetic stirring bar, 2-adamantanone **37a** (10.0 mmol), <sup>t</sup>BuOK (1.0 mmol, 10 mol%), RuCl<sub>2</sub>(PPh<sub>3</sub>)<sub>3</sub> (0.001 mol%), **L3** (0.0012 mol%), and 1,4-dioxane (20.0 mL) to a dried high-pressure reactor. After sealing, remove the high-pressure reactor from the glove box. Then the reactor was purged and charged with H<sub>2</sub> (2.0 MPa) and immersed into a pre-heated metal bath (110°C). After 48 hours the reaction was cooled, release H<sub>2</sub> from the reactor. Then quenched with saturated brine and DCM, and dried with Na<sub>2</sub>SO<sub>4</sub>. A small aliquot of the organic phase was analyzed by GC or GC-MS to monitor product formation. Then the solvent was evaporated under reduced pressure and the residue was purified by flash column chromatography (petroleum ether/ethyl acetate = 100:1 – 2:1) on silica gel to give the corresponding product **37b** in the 63.37% yield.

$$TON = \frac{N_s}{N_c} = \frac{964.7 \text{ mg}}{\frac{152.23 \text{ mg/mmol}}{0.0001 \text{ mmol}}} = 63,371$$

N<sub>s</sub>: The number of molecules of the substrate transformed in the reaction

N<sub>c</sub>: The number of active catalyst centers involved in the reaction

## 6.3

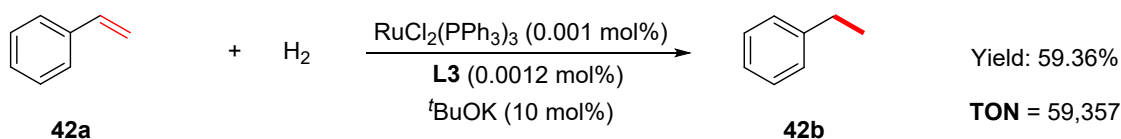

**10 mmol Scale:** In a nitrogen-filled glove box, add a magnetic stirring bar, styrene **42a** (10.0 mmol),  $t\text{BuOK}$  (1.0 mmol, 10 mol%),  $\text{RuCl}_2(\text{PPh}_3)_3$  (0.001 mol%), **L3** (0.0012 mol%), and 1,4-dioxane (20.0 mL) to a dried high-pressure reactor. After sealing, remove the high-pressure reactor from the glove box. Then the reactor was purged and charged with  $\text{H}_2$  (2.0 MPa) and immersed into a pre-heated metal bath (110°C). After 48 hours the reaction was cooled, release  $\text{H}_2$  from the reactor. Then quenched with saturated brine and DCM, and dried with  $\text{Na}_2\text{SO}_4$ . A small aliquot of the organic phase was analyzed by GC or GC-MS to monitor product formation. Then the solvent was evaporated under reduced pressure and the residue was purified by flash column chromatography (petroleum ether/ethyl acetate = 100:1 – 2:1) on silica gel to give the corresponding product **42b** in the 59.36% yield.

$$TON = \frac{N_s}{N_c} = \frac{630.2 \text{ mg}}{\frac{106.17 \text{ mg/mmol}}{0.0001 \text{ mmol}}} = 59,357$$

$N_s$ : The number of molecules of the substrate transformed in the reaction

$N_c$ : The number of active catalyst centers involved in the reaction

## 6.4

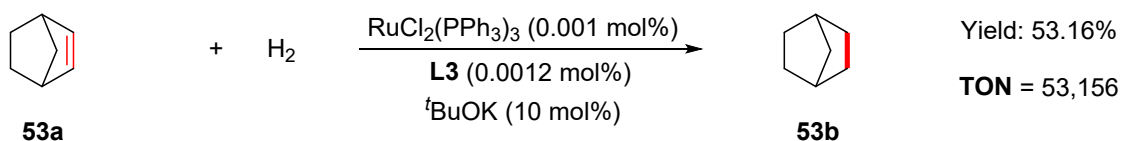

**10 mmol Scale:** In a nitrogen-filled glove box, add a magnetic stirring bar, norbornylene **53a** (10.0 mmol), <sup>t</sup>BuOK (1.0 mmol, 10 mol%), RuCl<sub>2</sub>(PPh<sub>3</sub>)<sub>3</sub> (0.001 mol%), **L3** (0.0012 mol%), and 1,4-dioxane (20.0 mL) to a dried high-pressure reactor. After sealing, remove the high-pressure reactor from the glove box. Then the reactor was purged and charged with H<sub>2</sub> (2.0 MPa) and immersed into a pre-heated metal bath (110°C). After 48 hours the reaction was cooled, release H<sub>2</sub> from the reactor. Then quenched with saturated brine and DCM, and dried with Na<sub>2</sub>SO<sub>4</sub>. A small aliquot of the organic phase was analyzed by GC or GC-MS to monitor product formation. Then the solvent was evaporated under reduced pressure and the residue was purified by flash column chromatography (petroleum ether/ethyl acetate = 100:1 – 2:1) on silica gel to give the corresponding product **53b** in the 53.16% yield.

$$TON = \frac{N_s}{N_c} = \frac{511.2 \text{ mg}}{96.17 \text{ mg/mmol}} \div \frac{0.0001 \text{ mmol}}{1} = 53,156$$

N<sub>s</sub>: The number of molecules of the substrate transformed in the reaction

N<sub>c</sub>: The number of active catalyst centers involved in the reaction

## 6.5

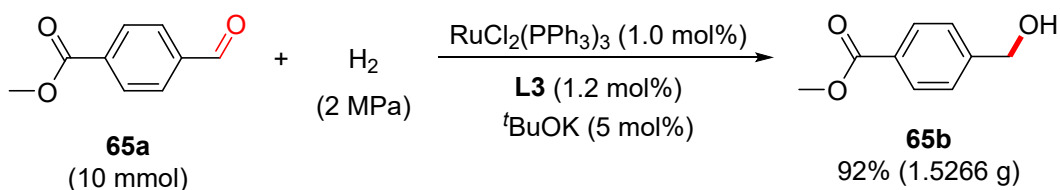

**10 mmol Scale:** In a nitrogen-filled glove box, add a magnetic stirring bar, **65a** (10.0 mmol),  $t\text{BuOK}$  (5 mol%),  $\text{RuCl}_2(\text{PPh}_3)_3$  (1 mol%), **L3** (1.2 mol%), and 1,4-dioxane (20.0 mL) to a dried high-pressure reactor. After sealing, remove the high-pressure reactor from the glove box. Then the reactor was purged and charged with  $\text{H}_2$  (2.0 MPa) and immersed into a pre-heated metal bath (110°C). After 24 hours the reaction was cooled, release  $\text{H}_2$  from the reactor. Then quenched with saturated brine and DCM, and dried with  $\text{Na}_2\text{SO}_4$ . A small aliquot of the organic phase was analyzed by GC or GC-MS to monitor product formation. Then the solvent was evaporated under reduced pressure and the residue was purified by flash column chromatography (petroleum ether/ethyl acetate = 20:1 – 2:1) on silica gel to give the corresponding product **65b** in the 92% yield (1.5266 g).

## 6.6

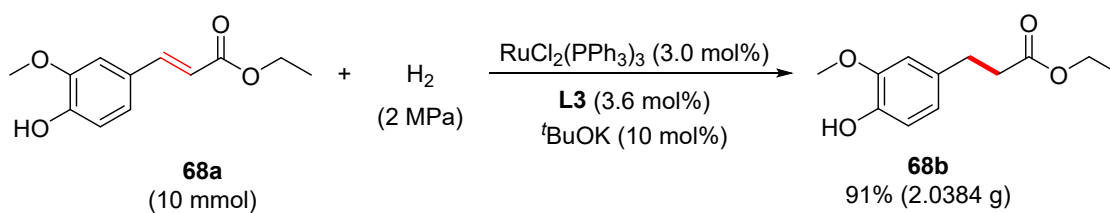

**10 mmol Scale:** In a nitrogen-filled glove box, add a magnetic stirring bar, **68a** (10.0 mmol), <sup>t</sup>BuOK (10 mol%), RuCl<sub>2</sub>(PPh<sub>3</sub>)<sub>3</sub> (3 mol%), **L3** (3.6 mol%), and 1,4-dioxane (20.0 mL) to a dried high-pressure reactor. After sealing, remove the high-pressure reactor from the glove box. Then the reactor was purged and charged with H<sub>2</sub> (2.0 MPa) and immersed into a pre-heated metal bath (110°C). After 24 hours the reaction was cooled, release H<sub>2</sub> from the reactor. Then quenched with saturated brine and DCM, and dried with Na<sub>2</sub>SO<sub>4</sub>. A small aliquot of the organic phase was analyzed by GC or GC-MS to monitor product formation. Then the solvent was evaporated under reduced pressure and the residue was purified by flash column chromatography (petroleum ether/ethyl acetate = 20:1 – 2:1) on silica gel to give the corresponding product **68b** in the 91% yield (2.0384 g).



## 6.7

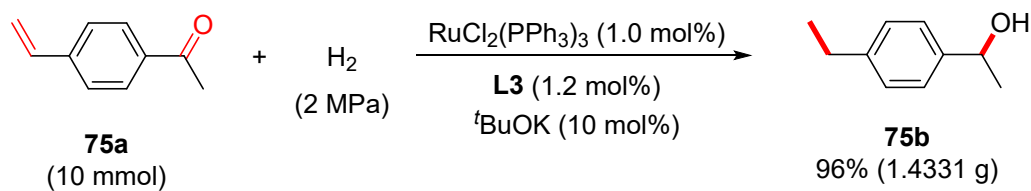

**10 mmol Scale:** In a nitrogen-filled glove box, add a magnetic stirring bar, **75a** (10.0 mmol), <sup>t</sup>BuOK (10 mol%), RuCl<sub>2</sub>(PPh<sub>3</sub>)<sub>3</sub> (1 mol%), **L3** (1.2 mol%), and 1,4-dioxane (20.0 mL) to a dried high-pressure reactor. After sealing, remove the high-pressure reactor from the glove box. Then the reactor was purged and charged with H<sub>2</sub> (2.0 MPa) and immersed into a pre-heated metal bath (110°C). After 24 hours the reaction was cooled, release H<sub>2</sub> from the reactor. Then quenched with saturated brine and DCM, and dried with Na<sub>2</sub>SO<sub>4</sub>. A small aliquot of the organic phase was analyzed by GC or GC-MS to monitor product formation. Then the solvent was evaporated under reduced pressure and the residue was purified by flash column chromatography (petroleum ether/ethyl acetate = 20:1 – 2:1) on silica gel to give the corresponding product **75b** in the 96% yield (1.4331 g).

## 6.8

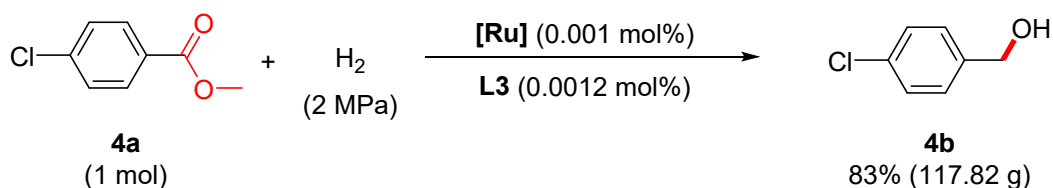

**1 mol Scale:** In a nitrogen-filled glove box, add a magnetic stirring bar, **4a** (1 mol), <sup>t</sup>BuOK (20 mol%), RuCl<sub>2</sub>(PPh<sub>3</sub>)<sub>3</sub> (0.001 mol%), **L3** (0.0012 mol%), and 1,4-dioxane (0.5 L) to a dried high-pressure reactor. After sealing, remove the high-pressure reactor from the glove box. Then the reactor was purged and charged with H<sub>2</sub> (2.0 MPa) and immersed into a pre-heated metal bath (110°C). After 48 hours the reaction was cooled, release H<sub>2</sub> from the reactor. Then quenched with saturated brine and DCM, and dried with Na<sub>2</sub>SO<sub>4</sub>. A small aliquot of the organic phase was analyzed by GC or GC-MS to monitor product formation. Then the residue was purified by recrystallization to obtain **4b** in the 83% yield (117.82 g).

## 6.9

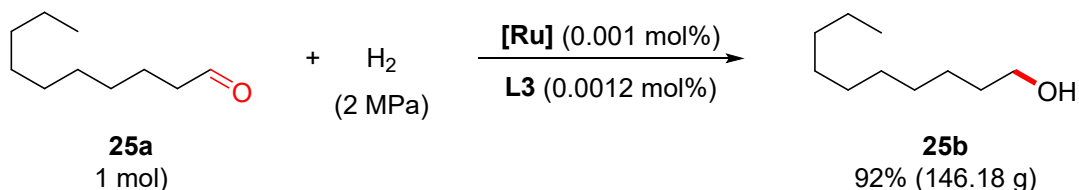

**1 mol Scale:** In a nitrogen-filled glove box, add a magnetic stirring bar, **25a** (1 mol), <sup>t</sup>BuOK (5 mol%), RuCl<sub>2</sub>(PPh<sub>3</sub>)<sub>3</sub> (0.001 mol%), **L3** (0.0012 mol%), and 1,4-dioxane (0.5 L) to a dried high-pressure reactor. After sealing, remove the high-pressure reactor from the glove box. Then the reactor was purged and charged with H<sub>2</sub> (2.0 MPa) and immersed into a pre-heated metal bath (110°C). After 48 hours the reaction was cooled, release H<sub>2</sub> from the reactor. Then quenched with saturated brine and DCM, and dried with Na<sub>2</sub>SO<sub>4</sub>. A small aliquot of the organic phase was analyzed by GC or GC-MS to monitor product formation. Then the residue was purified by distillation to obtain **25b** in the 92% yield (146.18 g).

## 7. Mechanism investigations

### 7.1

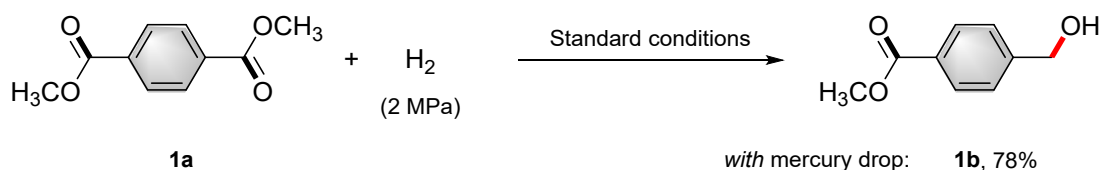

In a nitrogen-filled glove box, add a magnetic stirring bar, dimethyl terephthalate **1a** (0.5 mmol), *t*BuOK (0.05 mmol, 10 mol%), RuCl<sub>2</sub>(PPh<sub>3</sub>)<sub>3</sub> (1 mol%), **L3** (1.2 mol%), 1,4-dioxane (2.0 mL) and a drop of mercury to a dried high-pressure reactor. After sealing, remove the high-pressure reactor from the glove box. Then the reactor was purged and charged with H<sub>2</sub> (2.0 MPa) and immersed into a pre-heated metal bath (110°C) and stirred at 600 rpm. After design time the reaction was cooled, release H<sub>2</sub> from the reactor. Then quenched with saturated brine (100 μL) and DCM, and dried with Na<sub>2</sub>SO<sub>4</sub>. A small aliquot of the organic phase was analyzed by GC or GC-MS to monitor product formation. Then the solvent was evaporated under reduced pressure and the residue was purified by flash column chromatography (petroleum ether/ethyl acetate = 100:1 – 2:1) on silica gel to give the corresponding product **1b** in the 78% yield.

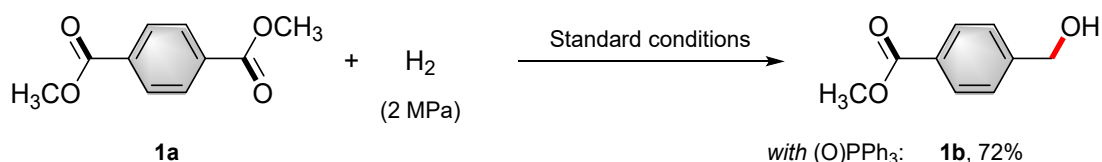

In a nitrogen-filled glove box, add a magnetic stirring bar, dimethyl terephthalate **1a** (0.5 mmol), *t*BuOK (0.05 mmol, 10 mol%), RuCl<sub>2</sub>(PPh<sub>3</sub>)<sub>3</sub> (1 mol%), **L3** (1.2 mol%), 1,4-dioxane (2.0 mL) and (O)PPh<sub>3</sub> (1.0 mmol) to a dried high-pressure reactor. After sealing, remove the high-pressure reactor from the glove box. Then the reactor was purged and charged with H<sub>2</sub> (2.0 MPa) and immersed into a pre-heated metal bath (110°C) and stirred at 600 rpm. After design time the reaction was cooled, release H<sub>2</sub> from the reactor. Then quenched with saturated brine (100 μL) and DCM, and dried with Na<sub>2</sub>SO<sub>4</sub>. A small aliquot of the organic phase was analyzed by GC or GC-MS to monitor

product formation. Then the solvent was evaporated under reduced pressure and the residue was purified by flash column chromatography (petroleum ether/ethyl acetate = 100:1 – 2:1) on silica gel to give the corresponding product **1b** in the 72% yield.

## 7.2

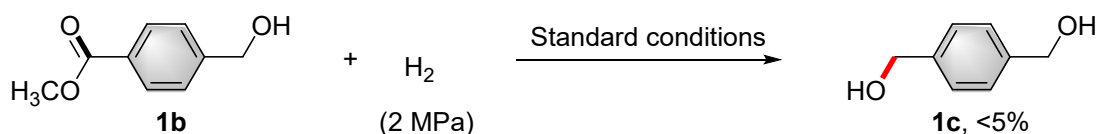

In a nitrogen-filled glove box, add a magnetic stirring bar, methyl 4-(hydroxymethyl)benzoate **1b** (0.5 mmol),  $t\text{BuOK}$  (0.05 mmol, 10 mol%),  $\text{RuCl}_2(\text{PPh}_3)_3$  (1 mol%), **L3** (1.2 mol%) and 1,4-dioxane (2.0 mL) to a dried high-pressure reactor. After sealing, remove the high-pressure reactor from the glove box. Then the reactor was purged and charged with  $\text{H}_2$  (2.0 MPa) and immersed into a pre-heated metal bath (110°C) and stirred at 600 rpm. After design time the reaction was cooled, release  $\text{H}_2$  from the reactor. Then quenched with saturated brine (100  $\mu\text{L}$ ) and DCM, and dried with  $\text{Na}_2\text{SO}_4$ . A small aliquot of the organic phase was analyzed by GC or GC-MS to monitor product formation. Then the solvent was evaporated under reduced pressure and the residue was purified by flash column chromatography (petroleum ether/ethyl acetate = 100:1 – 2:1) on silica gel to reclaim the **1b** in the 97% yield.

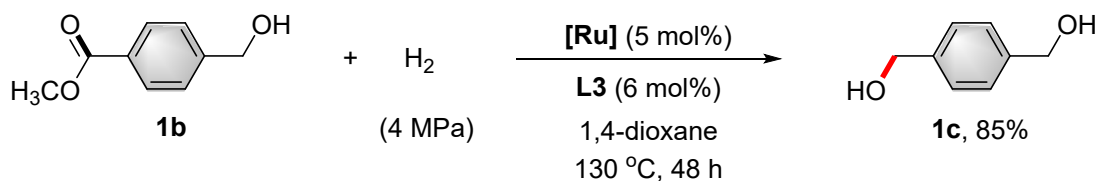

In a nitrogen-filled glove box, add a magnetic stirring bar, **1b** (0.5 mmol),  $t\text{BuOK}$  (20 mol%),  $\text{RuCl}_2(\text{PPh}_3)_3$  (5.0 mol%), **L3** (6.0 mol%), and 1,4-dioxane (2.0 mL) to a dried high-pressure reactor. After sealing, remove the high-pressure reactor from the glove box. Then the reactor was purged and charged with  $\text{H}_2$  (4.0 MPa) and immersed into a pre-heated metal bath (130°C). After 48 hours the reaction was cooled, release  $\text{H}_2$  from the reactor. Then quenched with saturated brine and DCM, and dried with  $\text{Na}_2\text{SO}_4$ . A small aliquot of the organic phase was analyzed by GC or GC-MS to monitor product

formation. Then the solvent was evaporated under reduced pressure and the residue was purified by flash column chromatography (petroleum ether/ethyl acetate = 20:1 – 2:1) on silica gel to give the corresponding product **1c** in the 85% yield.

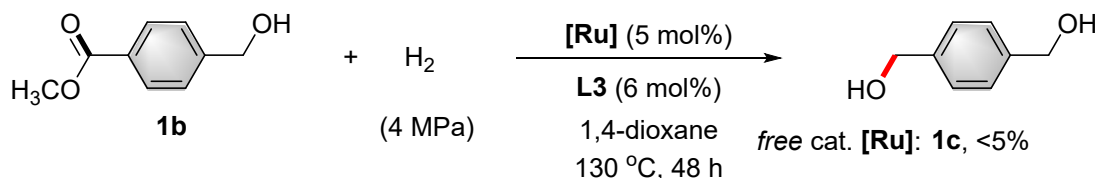

In a nitrogen-filled glove box, add a magnetic stirring bar, **1b** (0.5 mmol),  $t\text{BuOK}$  (20 mol%), **L3** (6.0 mol%), and 1,4-dioxane (2.0 mL) to a dried high-pressure reactor. After sealing, remove the high-pressure reactor from the glove box. Then the reactor was purged and charged with  $\text{H}_2$  (4.0 MPa) and immersed into a pre-heated metal bath (130°C). After 48 hours the reaction was cooled, release  $\text{H}_2$  from the reactor. Then quenched with saturated brine and DCM, and dried with  $\text{Na}_2\text{SO}_4$ . A small aliquot of the organic phase was analyzed by GC or GC-MS to monitor product formation. Then the solvent was evaporated under reduced pressure and the residue was purified by flash column chromatography (petroleum ether/ethyl acetate = 100:1 – 2:1) on silica gel to reclaim the **1b** in the 96% yield.

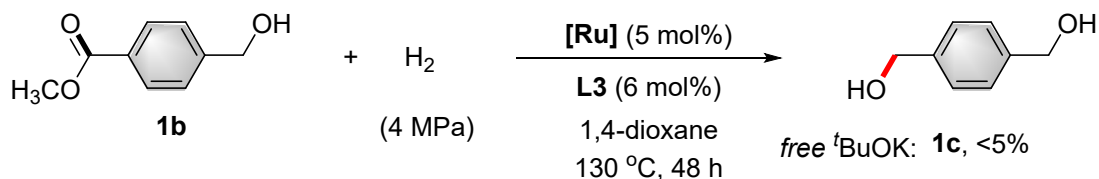

In a nitrogen-filled glove box, add a magnetic stirring bar, **1b** (0.5 mmol),  $\text{RuCl}_2(\text{PPh}_3)_3$  (5.0 mol%), **L3** (6.0 mol%), and 1,4-dioxane (2.0 mL) to a dried high-pressure reactor. After sealing, remove the high-pressure reactor from the glove box. Then the reactor was purged and charged with  $\text{H}_2$  (4.0 MPa) and immersed into a pre-heated metal bath (130°C). After 48 hours the reaction was cooled, release  $\text{H}_2$  from the reactor. Then quenched with saturated brine and DCM, and dried with  $\text{Na}_2\text{SO}_4$ . A small aliquot of the organic phase was analyzed by GC or GC-MS to monitor product

formation. Then the solvent was evaporated under reduced pressure and the residue was purified by flash column chromatography (petroleum ether/ethyl acetate = 100:1 – 2:1) on silica gel to reclaim the **1b** in the 96% yield.

### 7.3 Deuterium-labeled investigations with D<sub>2</sub>

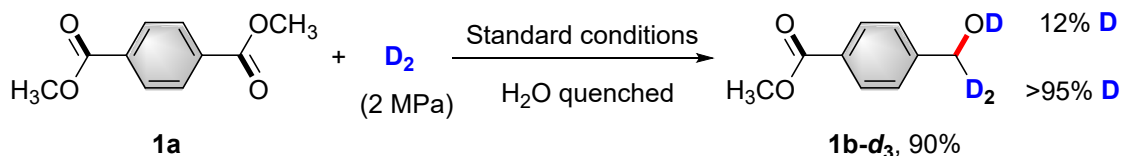

In a nitrogen-filled glove box, add a magnetic stirring bar, dimethyl terephthalate **1a** (0.5 mmol), <sup>t</sup>BuOK (0.05 mmol, 10 mol%), RuCl<sub>2</sub>(PPh<sub>3</sub>)<sub>3</sub> (1 mol%), **L3** (1.2 mol%) and 1,4-dioxane (2.0 mL) to a dried high-pressure reactor. After sealing, remove the high-pressure reactor from the glove box. Then the reactor was purged and charged with D<sub>2</sub> (2.0 MPa) and immersed into a pre-heated metal bath (110°C) and stirred at 600 rpm. After design time the reaction was cooled, release H<sub>2</sub> from the reactor. Then quenched with saturated brine (100 μL) and DCM, and dried with Na<sub>2</sub>SO<sub>4</sub>. A small aliquot of the organic phase was analyzed by GC or GC-MS to monitor product formation. Then the solvent was evaporated under reduced pressure and the residue was purified by flash column chromatography (petroleum ether/ethyl acetate = 100:1 – 2:1) on silica gel to give the corresponding product **1b-d<sub>3</sub>** in the 90% yield.

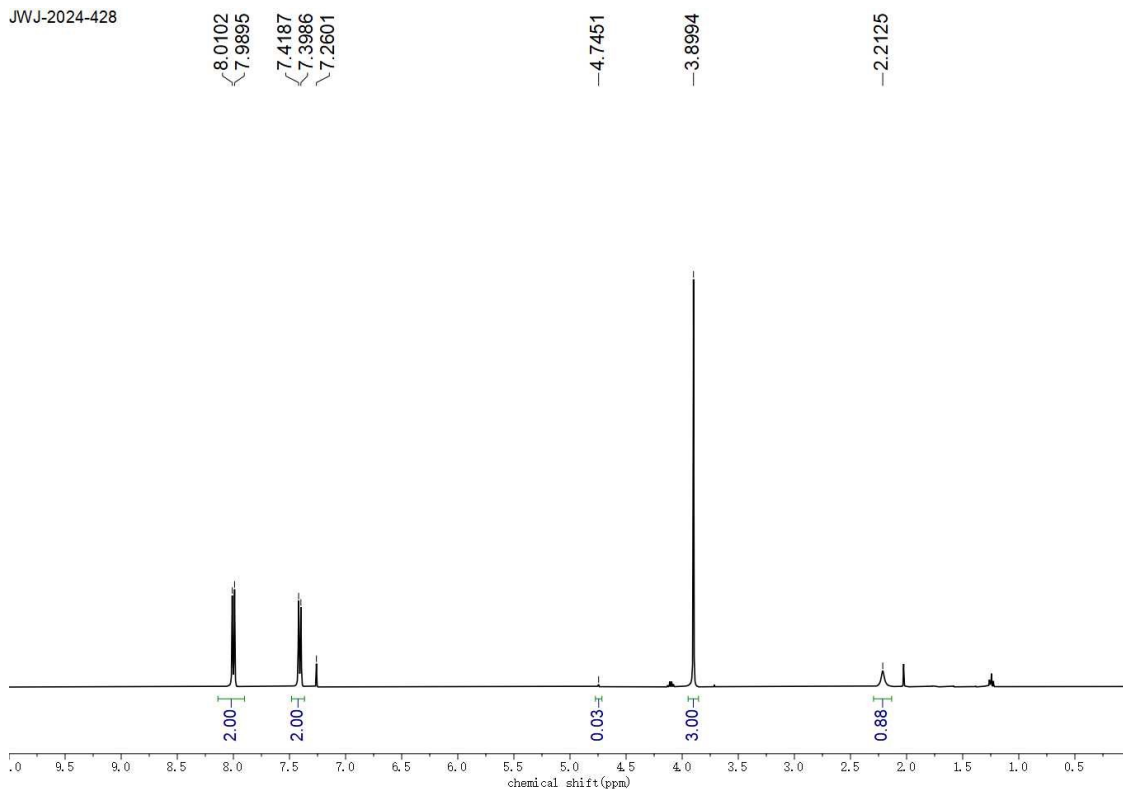Figure S1  $^1\text{H-NMR}$  of **1b-d<sub>3</sub>**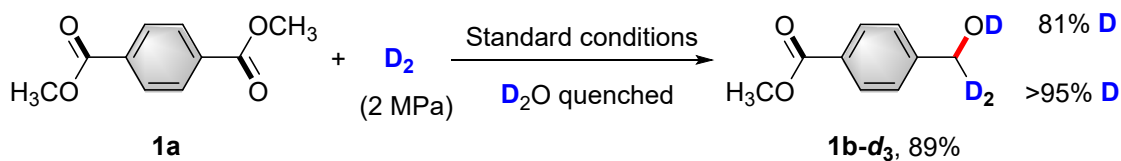

In a nitrogen-filled glove box, add a magnetic stirring bar, dimethyl terephthalate **1a** (0.5 mmol),  $t\text{BuOK}$  (0.05 mmol, 10 mol%),  $\text{RuCl}_2(\text{PPh}_3)_3$  (1 mol%), **L3** (1.2 mol%) and 1,4-dioxane (2.0 mL) to a dried high-pressure reactor. After sealing, remove the high-pressure reactor from the glove box. Then the reactor was purged and charged with  $\text{D}_2$  (2.0 MPa) and immersed into a pre-heated metal bath (110°C) and stirred at 600 rpm. After design time the reaction was cooled, release  $\text{H}_2$  from the reactor. Then quenched with saturated brine (100  $\mu\text{L}$ ) and DCM, and dried with  $\text{Na}_2\text{SO}_4$ . A small aliquot of the organic phase was analyzed by GC or GC-MS to monitor product formation. Then the solvent was evaporated under reduced pressure and the residue was purified by flash column chromatography (petroleum ether/ethyl acetate = 100:1 – 2:1) on silica gel to give the corresponding product **1b-d<sub>3</sub>** in the 89% yield.

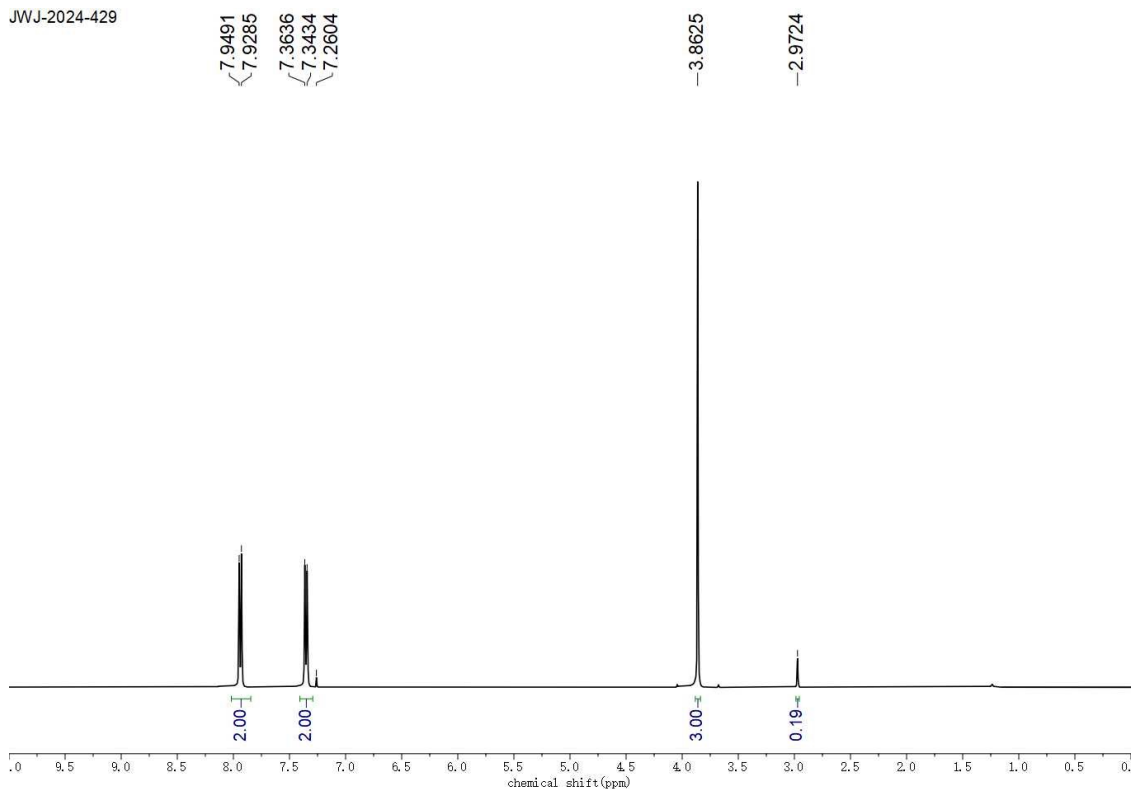

Figure S2  $^1\text{H-NMR}$  of  $1b-d_3$

## 8. References

- [1] Wang, F.; Ding, D.; Zhang, C.; Zhang, G., Formation of ylidenehydrazines enabled by manganese-catalyzed acceptorless dehydrogenative coupling. *Organic Chemistry Frontiers* **2024**, *11*, 1420-1429.
- [2] Shen, J.-J.; Kang, X.-L.; Ren, Q.-Z.; Li, G.-P.; Gao, Y.-N.; Hao, P.-F.; Fu, Y.-L., Effect of positional isomers on the photochromic behaviors of bipyridyltriazolium chloroantimonate hybrids. *Dalton Transactions* **2020**, *49*, 4470-4475.
- [3] Muley, A.; Karumban, K. S.; Kumbhakar, S.; Giri, B.; Maji, S., High phenoxazinone synthase activity of two mononuclear cis-dichloro cobalt(ii) complexes with a rigid pyridyl scaffold. *New Journal of Chemistry* **2022**, *46*, 521-532.
- [4] Zhang, C.; Liang, Z.; Jia, X.; Wang, M.; Zhang, G.; Hu, M.-L., A practical base mediated synthesis of 1,2,4-triazoles enabled by a deamination annulation strategy. *Chemical Communications* **2020**, *56*, 14215-14218.
- [5] Liang, Q.; Zhang, C.; Wang, F.; Luo, Z.; Yang, W.; Zhang, G.; Ding, D.; Zhang, G., Triazole backbone ligand in an unprecedented efficient manganese catalyst for use in transfer hydrogenation. *Science China Chemistry* **2023**, *66*, 2028-2036.
- [6] Yu, Q.; Zhou, D.; Liu, Y.; Huang, X.; Song, C.; Ma, J.; Li, J., Synthesis of Benzylic Alcohols by Decarboxylative Hydroxylation. *Organic Letters* **2022**, *25*, 47-52.
- [7] Ramachandran, P. V.; Alawaed, A. A.; Hamann, H. J., A Safer Reduction of Carboxylic Acids with Titanium Catalysis. *Organic Letters* **2022**, *24*, 8481-8486.



- [8] Han, H. J.; Kim, H. T.; Kim, J.; Jaladi, A. K.; An, D. K., Magnesium-mediated hydroboration under ambient condition: A reduction of esters, aldehydes, and ketones. *Tetrahedron* **2023**, *142* 133500.
- [9] Jakhar, V. K.; Barman, M. K.; Nembenna, S., Aluminum Monohydride Catalyzed Selective Hydroboration of Carbonyl Compounds. *Organic Letters* **2016**, *18*, 4710-4713.
- [10] Cuccu, F.; Basoccu, F.; Fattuoni, C.; Porcheddu, A., Mechanically accelerated catalytic hydrogenation: correlating physical state, reaction rate, and interface area. *Green Chemistry* **2024**, *26*, 1927-1934.
- [11] Latha, A. T.; P, C. A. S., Air-Stable Iron(III) Salen Complexes for Selective Hydroboration of Ketones and Unactivated Imines without Base Activation. *The Journal of Organic Chemistry* **2024**, *89*, 8376-8384.
- [12] Liu, Y.; He, S.; Quan, Z.; Cai, H.; Zhao, Y.; Wang, B., Mild palladium-catalysed highly efficient hydrogenation of C≡N, C–NO<sub>2</sub>, and C=O bonds using H<sub>2</sub> of 1 atm in H<sub>2</sub>O. *Green Chemistry* **2019**, *21*, 830-838.
- [13] Huang, M.; Cai, X.; Liu, Y.; Ke, Z., Base-controlled NHC-Ru-catalyzed transfer hydrogenation and  $\alpha$ -methylation/transfer hydrogenation of ketones using methanol. *Chinese Chemical Letters* **2024**, *35*, 109323.
- [14] Zhang, J.; Chen, M.; Xiao, J.; Han, H.; Zhao, J.; Zhang, L.; Wang, F.; Liu, Z.-Q., A Recyclable Electrochemical Reduction of Aldehydes and Ketones to Alcohols Using Water as the Hydrogen Source and Solvent. *The Journal of Organic Chemistry* **2024**, *89*, 7065-7075.
- [15] Yan, P.; Zeng, R.; Bao, B.; Yang, X.-M.; Zhu, L.; Pan, B.; Niu, S.-L.; Qi, X.-W.; Li, Y.-L.; Ouyang, Q., Red light-induced highly efficient aerobic oxidation of organoboron compounds using spinach as a photocatalyst. *Green Chemistry* **2022**, *24*, 9263-9268.
- [16] Tian, J.; Xu, D.; Sun, W., Cobalt(II) - Catalyzed Transfer Hydrogenation of Simple Alkenes. *Advanced Synthesis & Catalysis* **2022**, *364*, 3874-3880.
- [17] Gao, M.-Y.; Gosmini, C., Cobalt-Catalyzed Reductive Cross-Coupling To Construct Csp<sup>3</sup>–Csp<sup>3</sup> Bonds via Csp<sup>3</sup>–S and Csp<sup>3</sup>–X Bonds Activation. *Organic Letters* **2023**, *25*, 7689-7693.
- [18] Nair, A.; Poonia, S.; Yadav, P.; Saini, P.; Elias, A. J., Aqueous organometallic synthesis: Ammonia borane (NH<sub>3</sub>.BH<sub>3</sub>) as a convenient metal-free reagent for the reduction of ferrocenyl and ferrocenium carbonyl derivatives in water. *Journal of Organometallic Chemistry* **2024**, *1017*, 123273.
- [19] Li, S.; Ma, Y.; Zhao, Y.; Liu, R.; Zhao, Y.; Dai, X.; Ma, N.; Streb, C.; Chen, X., Hydrogenation Catalysis by Hydrogen Spillover on Platinum-Functionalized Heterogeneous Boronic Acid-Polyoxometalates. *Angewandte Chemie International Edition* **2023**, *62*, e202314999.
- [20] Chun, Y. S.; Shin, J. Y.; Song, C. E.; Lee, S.-g., Palladium nanoparticles supported onto ionic carbon nanotubes as robust recyclable catalysts in an ionic liquid. *Chem. Commun.* **2008**, 942-944.

- [21] Su, B.; Li, Y.; Li, Z. H.; Hou, J.-L.; Wang, H., Activation of C–C Bonds via  $\sigma$ -Bond Metathesis: Hydroborenum-Catalyzed Hydrogenolysis of Cyclopropanes. *Organometallics* **2020**, *39*, 4159-4163.
- [22] Mehta, M.; Holthausen, M. H.; Mallov, I.; Pérez, M.; Qu, Z. W.; Grimme, S.; Stephan, D. W., Catalytic Ketone Hydrodeoxygenation Mediated by Highly Electrophilic Phosphonium Cations. *Angewandte Chemie International Edition* **2015**, *54*, 8250-8254.
- [23] Kolb, S.; Werz, D. B., Site-selective Hydrogenation/Deuteration of Benzylic Olefins Enabled by Electroreduction Using Water. *Chemistry - A European Journal* **2023**, *29* e202300849.
- [24] Humblot, A.; Chave, T.; Amaniampong, P. N.; Streiff, S.; Jérôme, F., Sonochemically-Induced Reduction of Alkenes to Alkanes with Ammonia. *Angewandte Chemie International Edition* **2022**, *61* e202212719.
- [25] Hsu, Y.-C.; Datta, S.; Ting, C.-M.; Liu, R.-S., Gold-Catalyzed [4+3]-Annulation of Oxabicyclic Benzenes with 2-Substituted Allylsilanes through Tandem Allylation and Cyclization. *Organic Letters* **2008**, *10*, 521-524.
- [26] Katayama, Y.; Watanabe, K.; Nishiyama, Y.; Yokoshima, S., Fluorinated 2,6-Xylenesulfonyl Group: A Protective Group for Amines. *Organic Letters* **2023**, *25*, 1326-1330.
- [27] Liu, Z.; Yu, Y.-J.; Bai, Y.-Q.; Chen, M.-W.; Zhou, Y.-G., Manganese Pentacarbonyl Bromide as Regeneration Catalyst Enabled Biomimetic Asymmetric Reduction. *Organic Letters* **2024**, *26*, 2535-2539.
- [28] Bhatt, T.; Natte, K., Transfer Hydrogenation of N- and O-Containing Heterocycles Including Pyridines with H<sub>3</sub>N–BH<sub>3</sub> Under the Catalysis of the Homogeneous Ruthenium Precatalyst. *Organic Letters* **2024**, *26*, 866-871.
- [29] Zhang, L.; Li, M.; Yang, Y.; Cheng, X.; Zhou, Q.-L., Electrochemical reduction of benzoic acid esters using water as a H/D source. *Green Chemistry* **2024**, *26*, 2059-2066.
- [30] Coufourier, S.; Ndiaye, D.; Gaillard, Q. G.; Bettoni, L.; Joly, N.; Mbaye, M. D.; Poater, A.; Gaillard, S.; Renaud, J.-L., Iron-catalyzed chemoselective hydride transfer reactions. *Tetrahedron* **2021**, *90* 132187.
- [31] Chen, T. S.; Long, H.; Gao, Y.; Xu, H. C., Continuous Flow Electrochemistry Enables Practical and Site-Selective C–H Oxidation. *Angewandte Chemie International Edition* **2023**, *62*, e202310138.
- [32] Neate, P. G. N.; Zhang, B.; Conforti, J.; Brennessel, W. W.; Neidig, M. L., Dilithium Amides as a Modular Bis-Anionic Ligand Platform for Iron-Catalyzed Cross-Coupling. *Organic Letters* **2021**, *23*, 5958-5963.
- [33] Deng, Z.; Han, S.; Ke, M.; Ning, Y.; Chen, F.-E., Ligand-enabled palladium-catalyzed hydroesterification of vinyl arenes with high linear selectivity to access 3-arylpropanoate esters. *Chemical Communications* **2022**, *58*, 3921-3924.
- [34] Hattori, H.; Mitsunaga, T.; Clive, D. L. J., Synthesis of phenolic components of Grains of Paradise. *Tetrahedron Letters* **2019**, *60*, 1989-1991.
- [35] Chen, S.; Xi, C., CO<sub>2</sub> promoted photoredox/Ni-catalyzed semi-reduction of alkynes with H<sub>2</sub>O. *Green Chemistry* **2023**, *25*, 7978-7982.

- [36] Redina, E. A.; Vikanova, K. V.; Kapustin, G. I.; Mishin, I. V.; Tkachenko, O. P.; Kustov, L. M., Selective Room-Temperature Hydrogenation of Carbonyl Compounds under Atmospheric Pressure over Platinum Nanoparticles Supported on Ceria-Zirconia Mixed Oxide. *European Journal of Organic Chemistry* **2019**, *2019*, 4159-4170.
- [37] Xi, Z.-W.; Yang, L.; Wang, D.-Y.; Feng, C.-W.; Qin, Y.; Shen, Y.-M.; Pu, C.; Peng, X., Visible Light Induced Reduction and Pinacol Coupling of Aldehydes and Ketones Catalyzed by Core/Shell Quantum Dots. *The Journal of Organic Chemistry* **2021**, *86*, 2474-2488.
- [38] Yang, F.; Saiki, Y.; Nakaoka, K.; Ema, T., One-Pot Synthesis of Aldehydes or Alcohols from CO<sub>2</sub> via Formamides or Silyl Formates. *Advanced Synthesis & Catalysis* **2023**, *365*, 877-883.
- [39] Surya Prakash, G. K.; Gurung, L.; Glinton, K. E.; Belligund, K.; Mathew, T.; Olah, G. A., Poly(4-vinylpyridine)-nitrating mixture complex (PVP-NM): solid nitrating mixture equivalent for safe and efficient aromatic nitration. *Green Chemistry* **2015**, *17*, 3446-3451.
- [40] Iyer, K. S.; Nelson, C.; Lipshutz, B. H., Facile, green, and functional group-tolerant reductions of carboxylic acids...in, or with, water. *Green Chemistry* **2023**, *25*, 2663-2671.

JWJ-2023-49

7.9853  
7.9647  
7.3968  
7.3766  
7.2600

4.7186

3.8852

2.5588

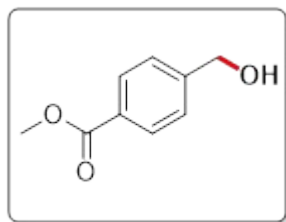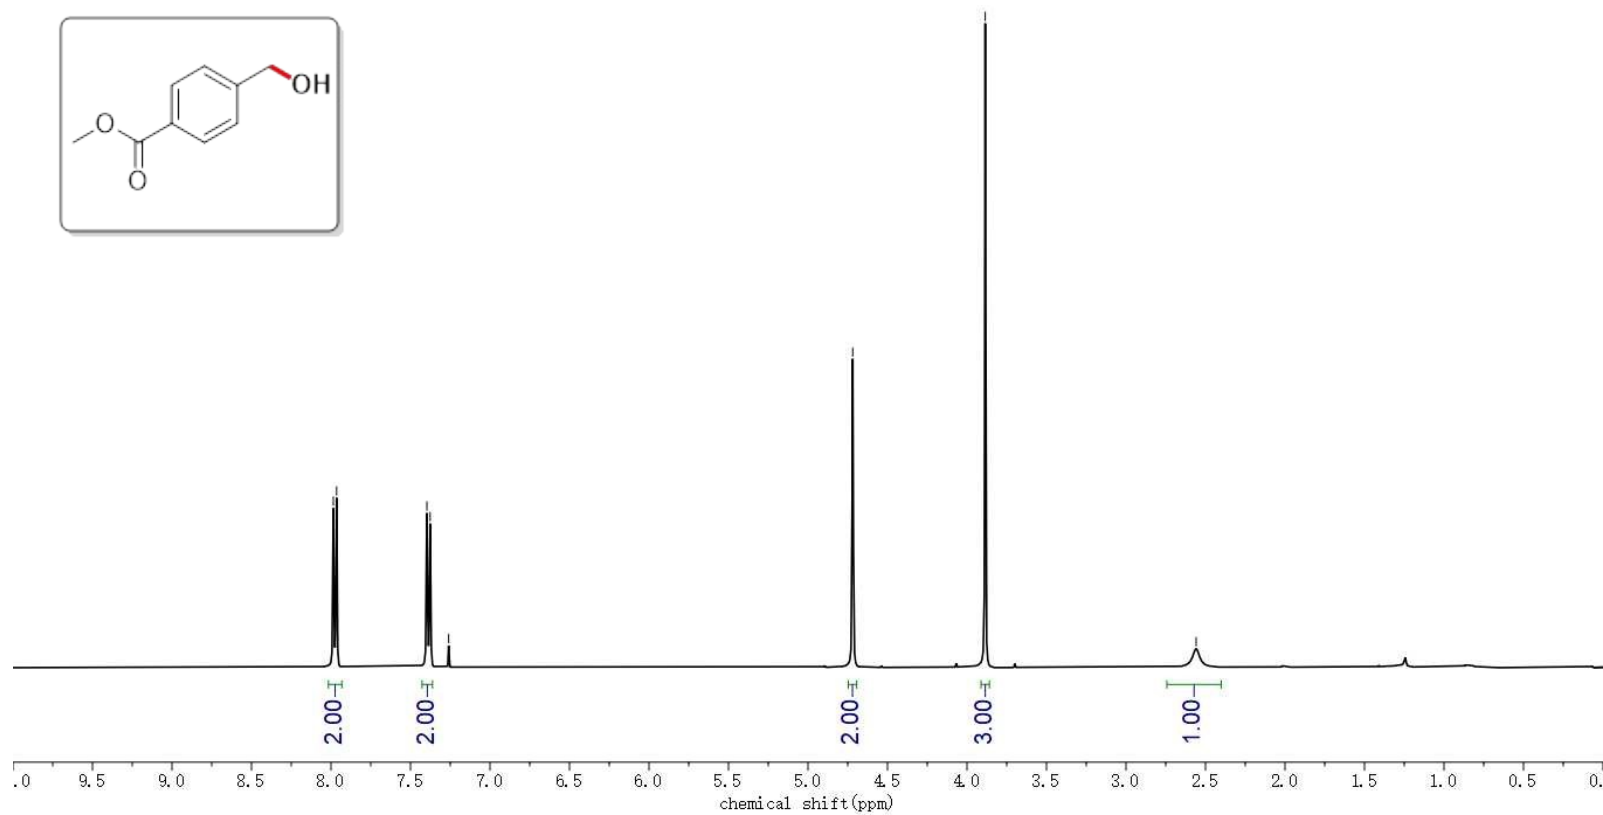

JWJ-2023-49

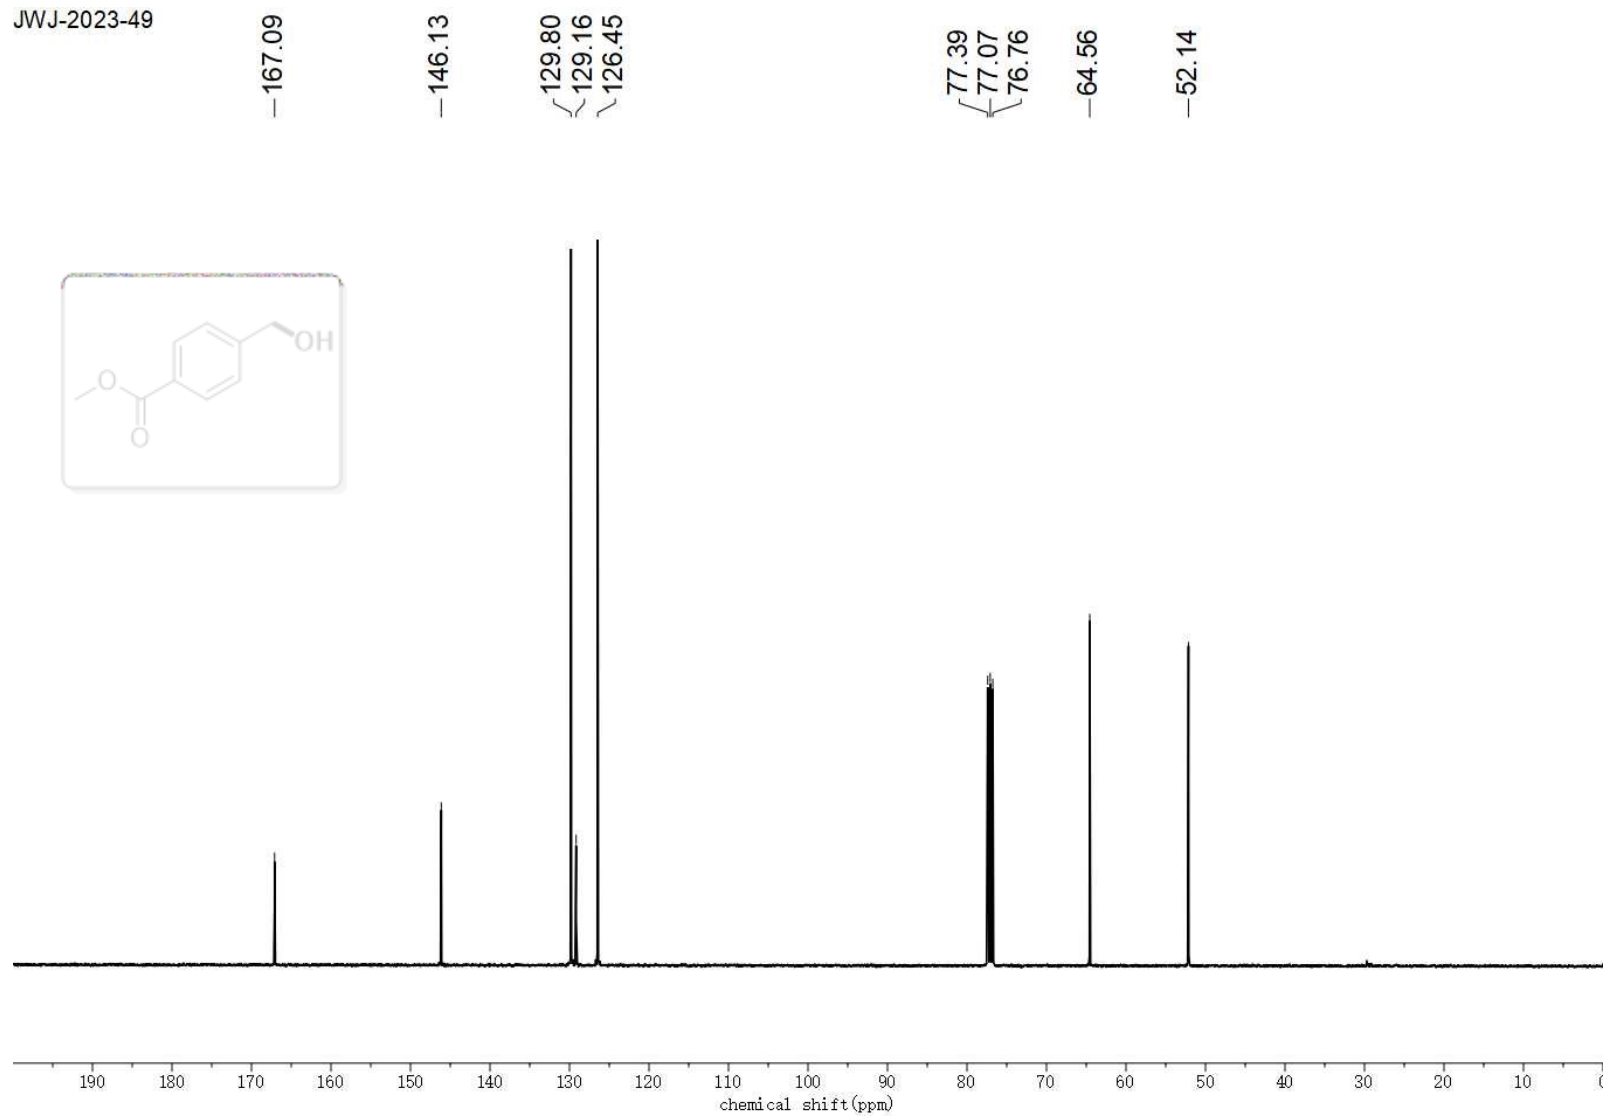

JWJ-2024-426

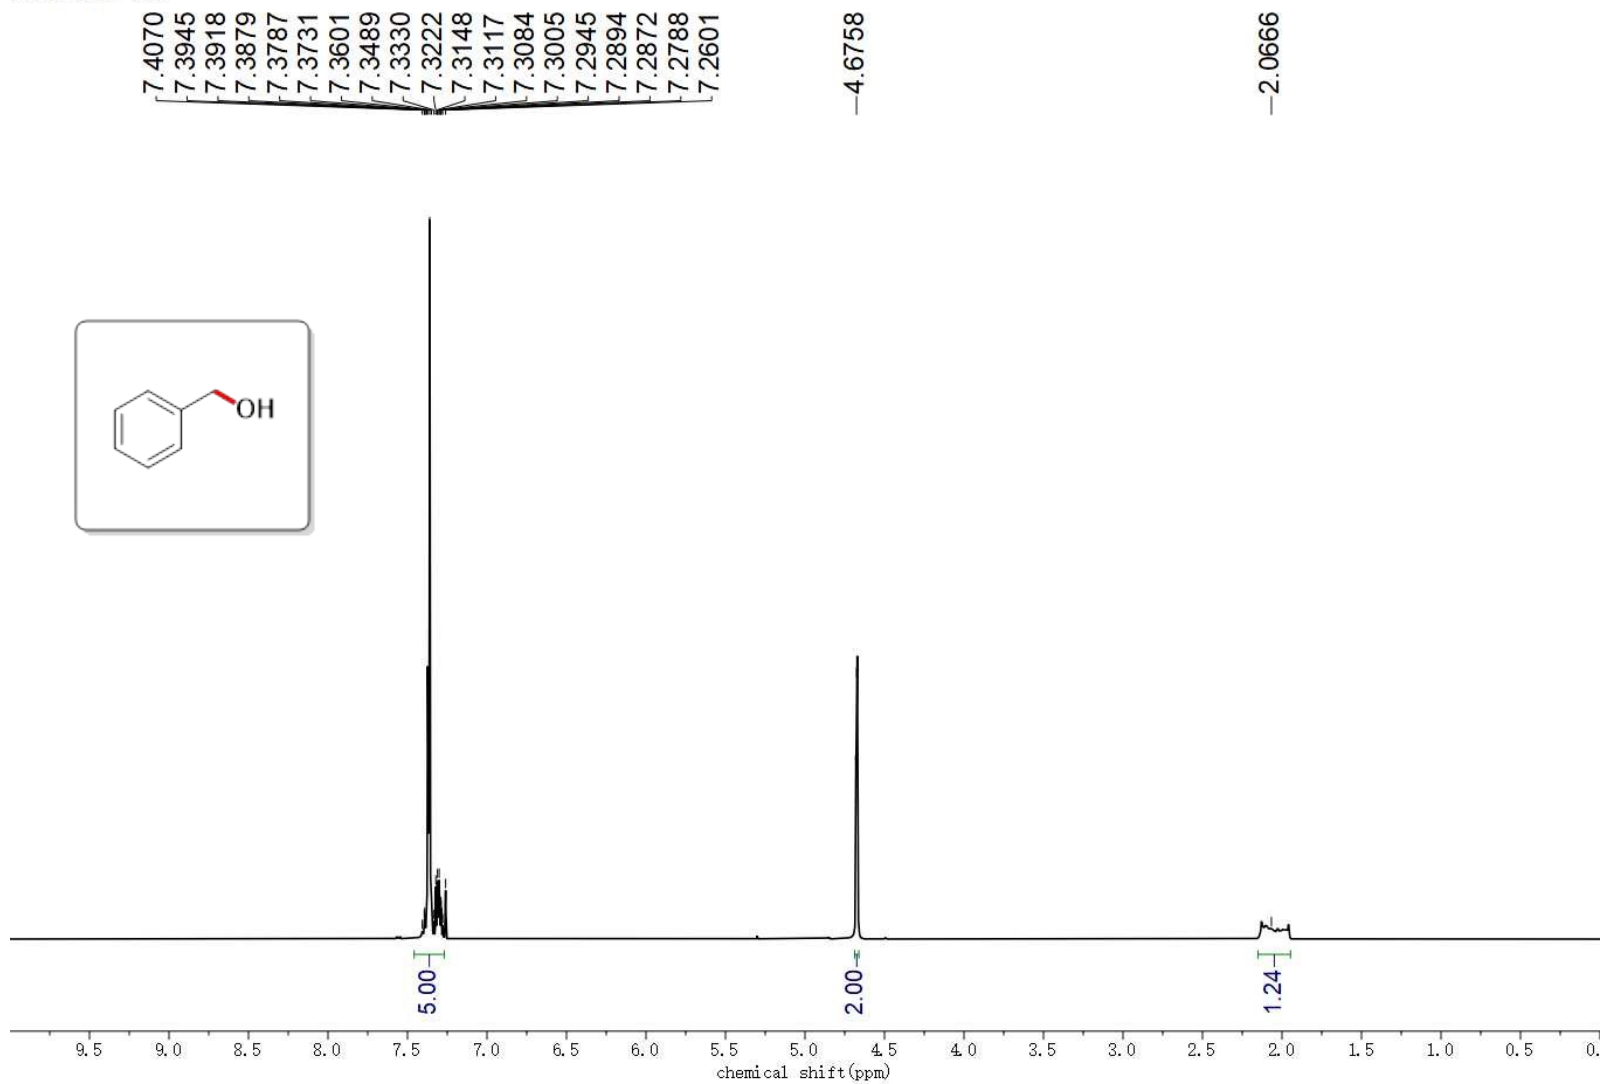

JWJ-2024-426

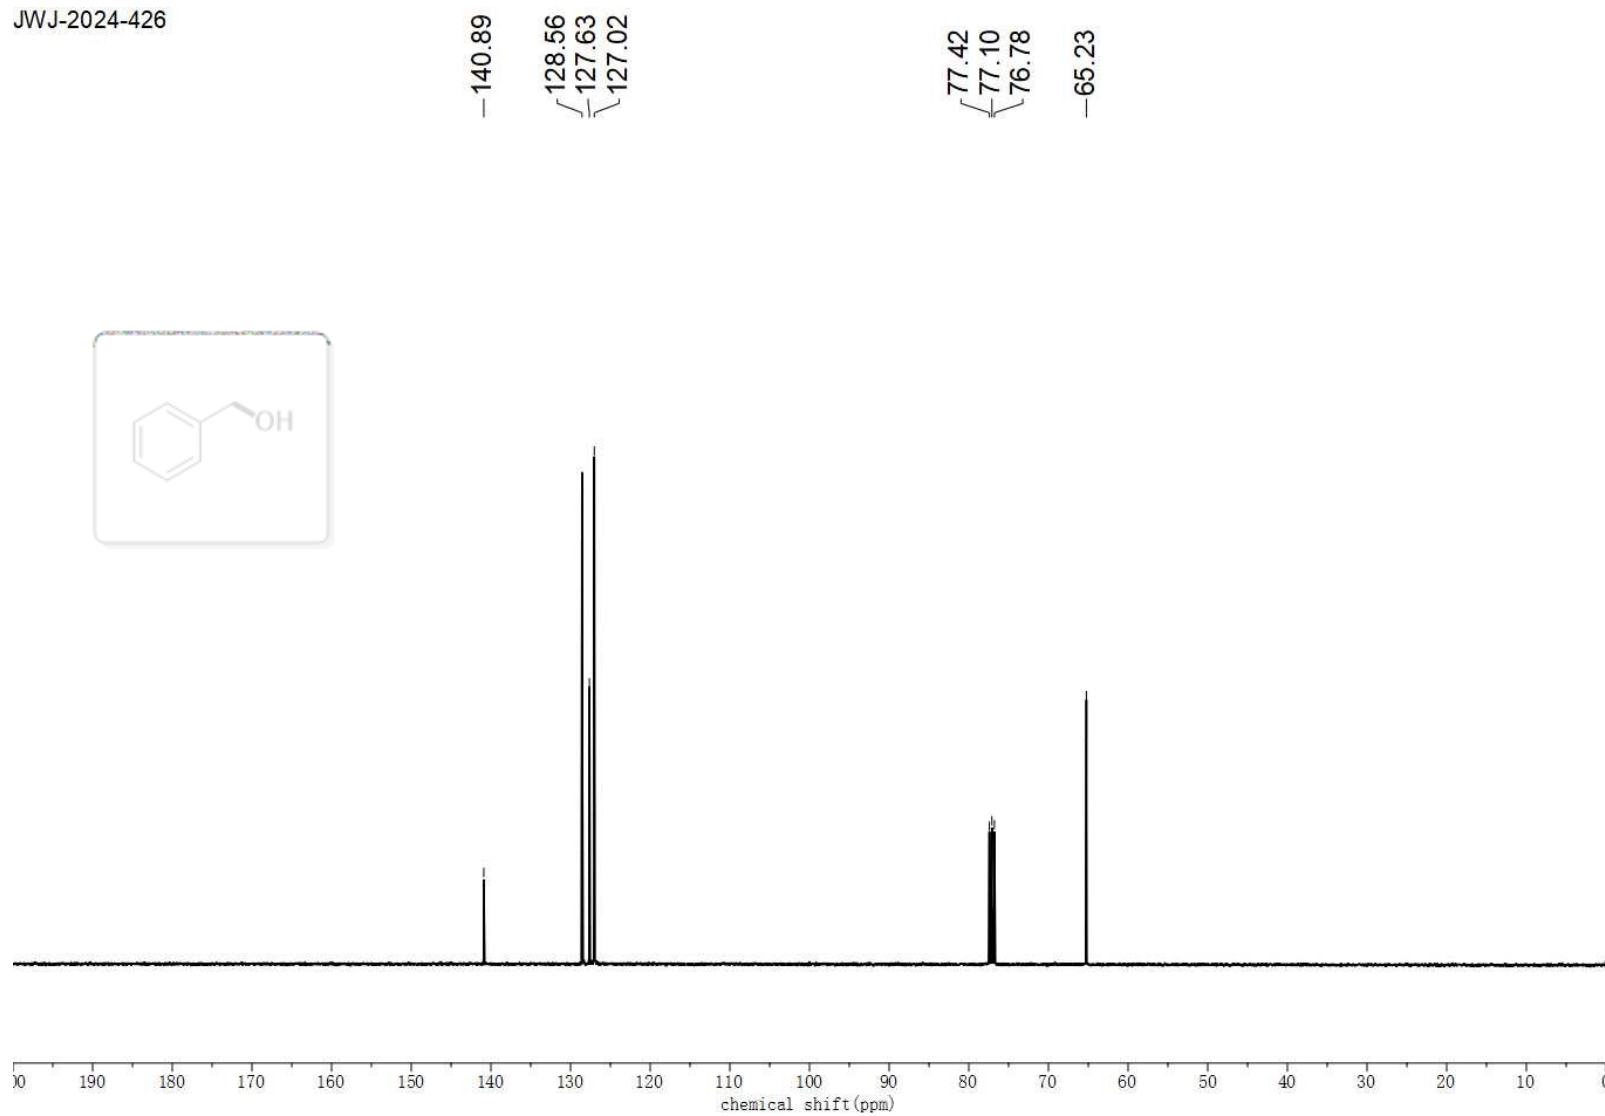

JWJ-2024-398

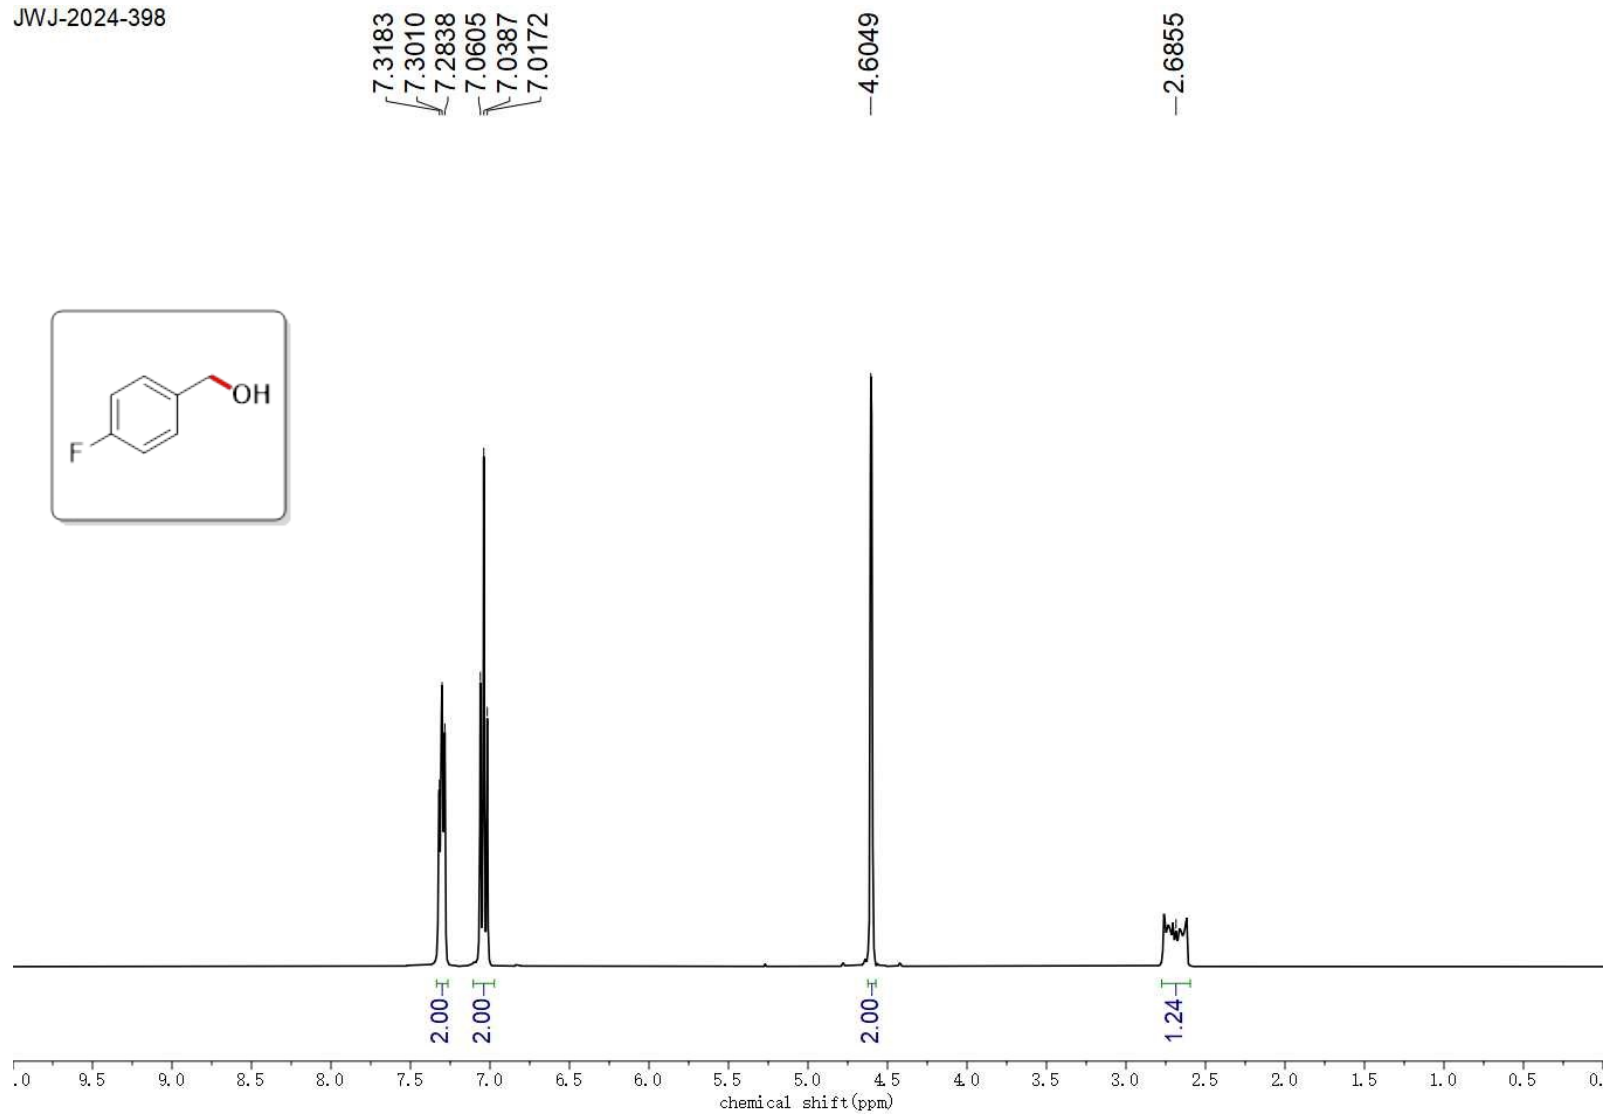



JWJ-2024-398

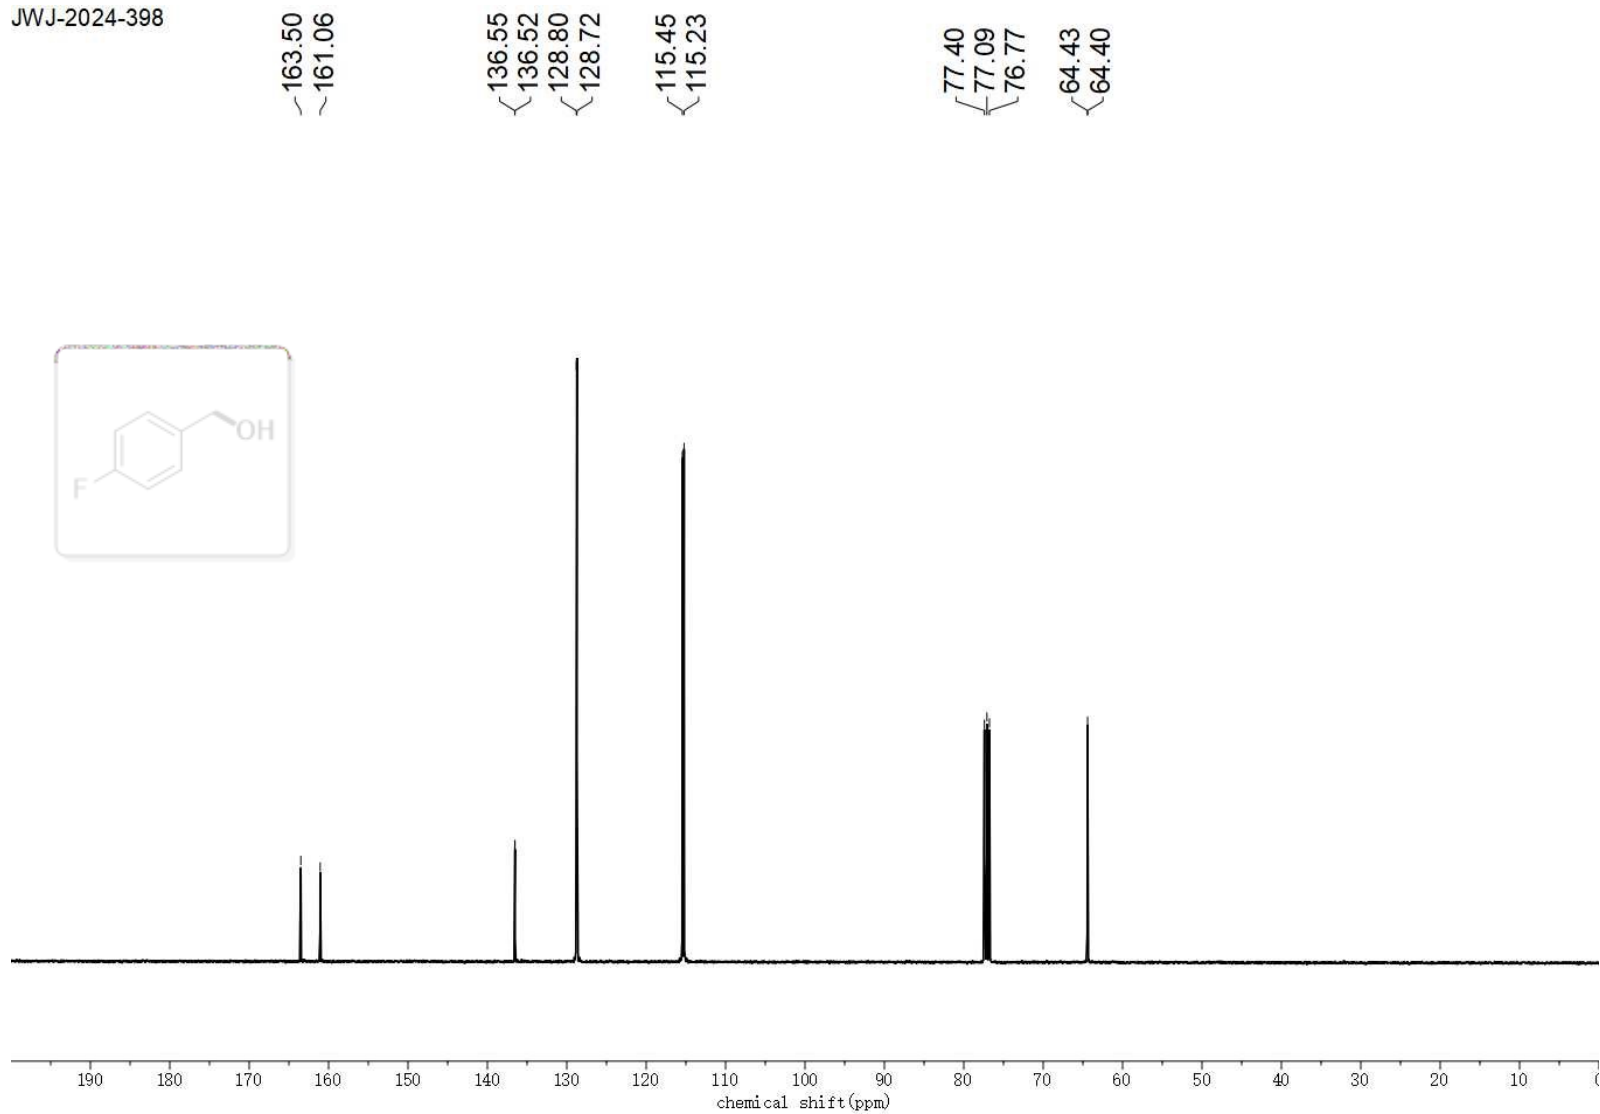

JWJ-2024-398

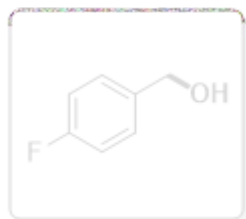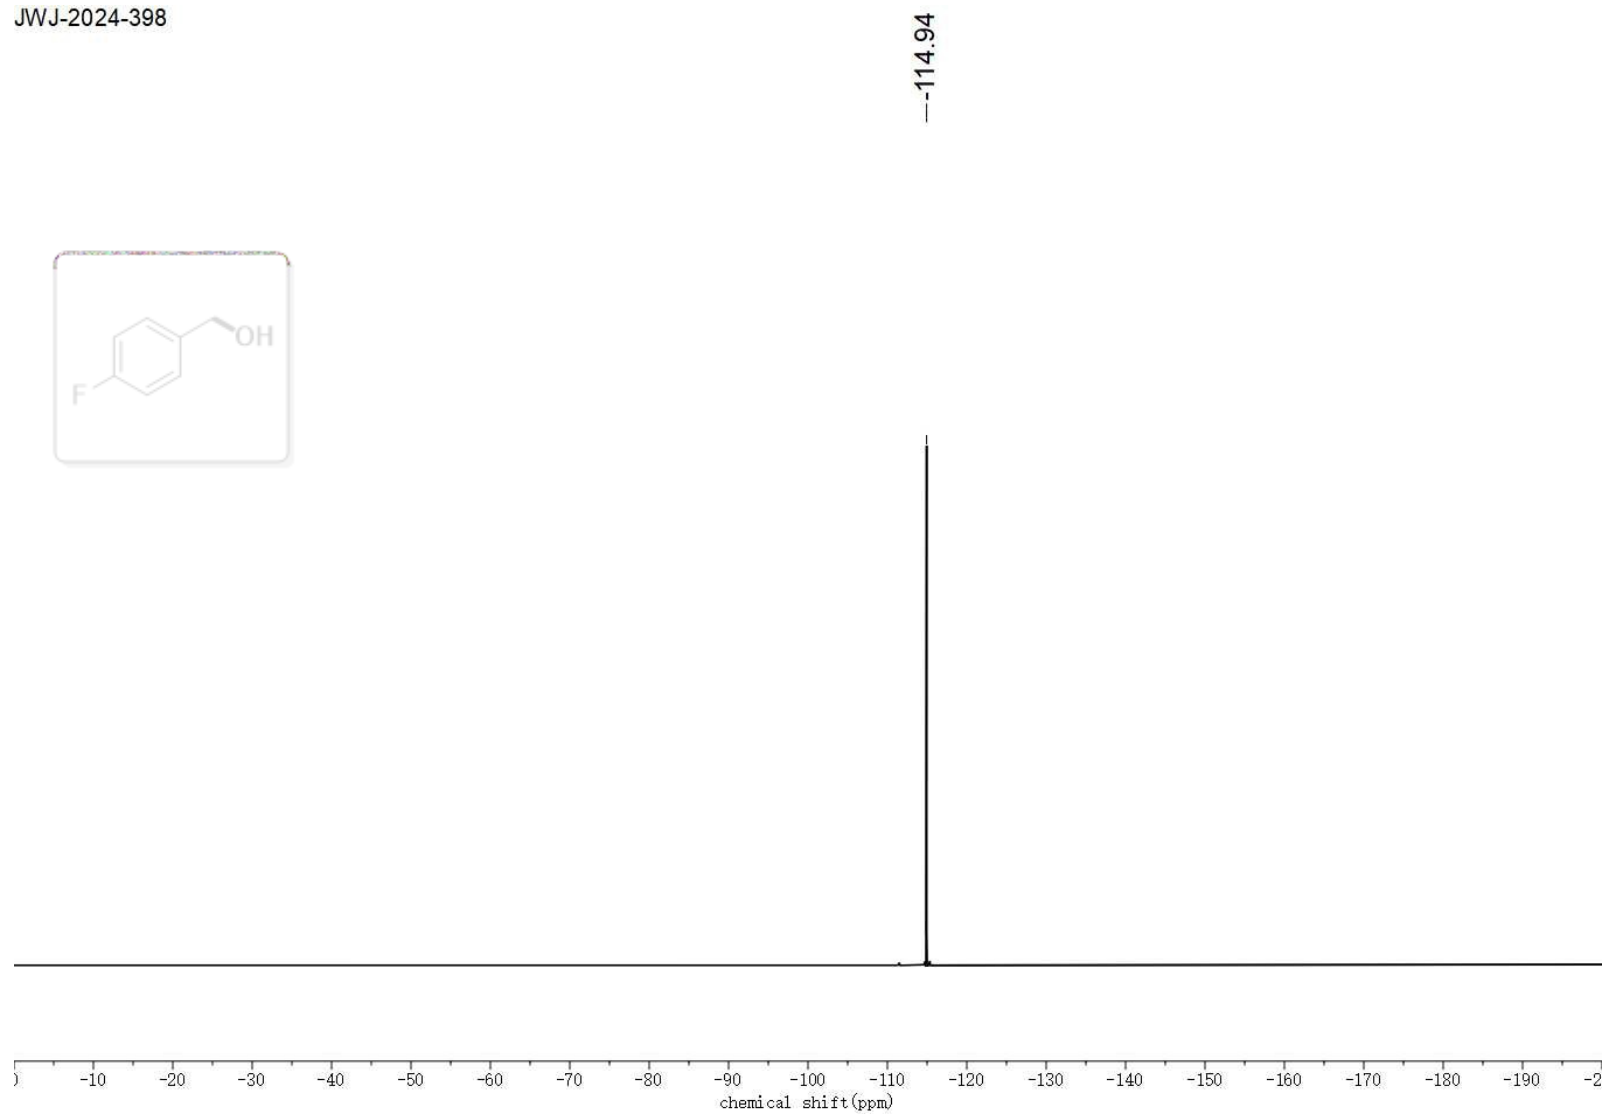

JWJ-2024-315

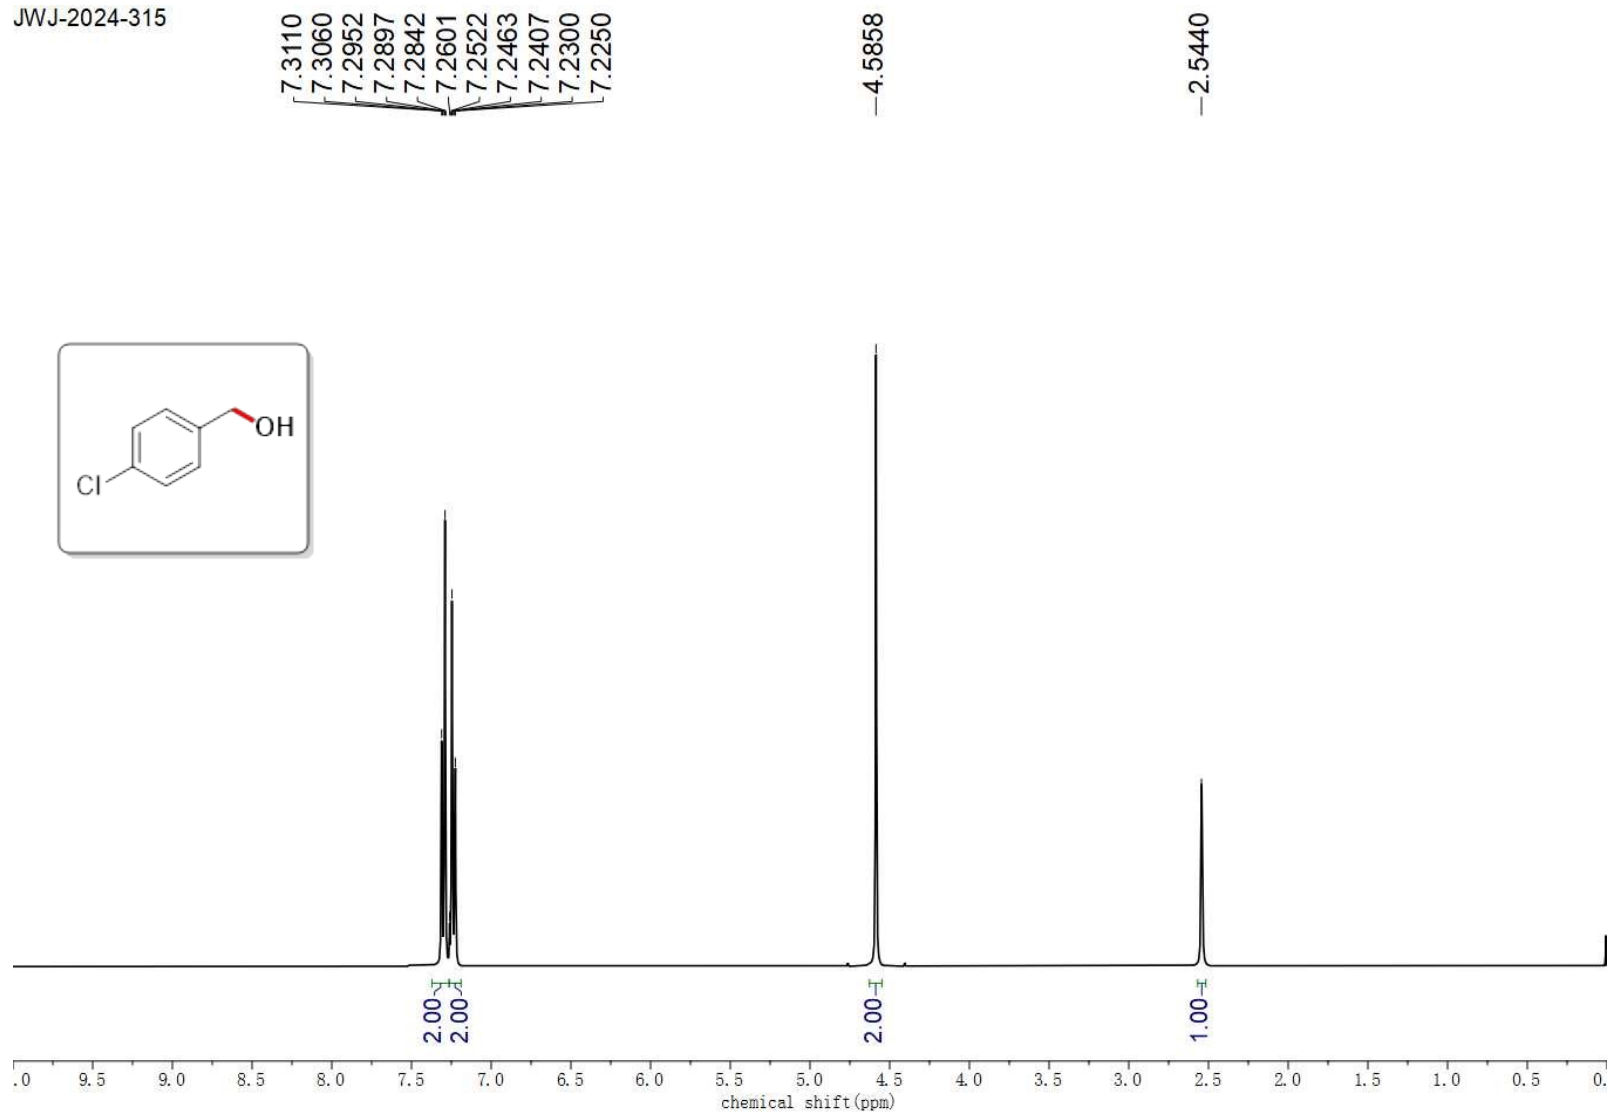

JWJ-2024-315

139.23  
133.31  
128.65  
128.28

77.42  
77.10  
76.78  
64.37

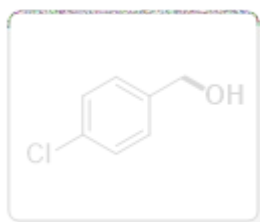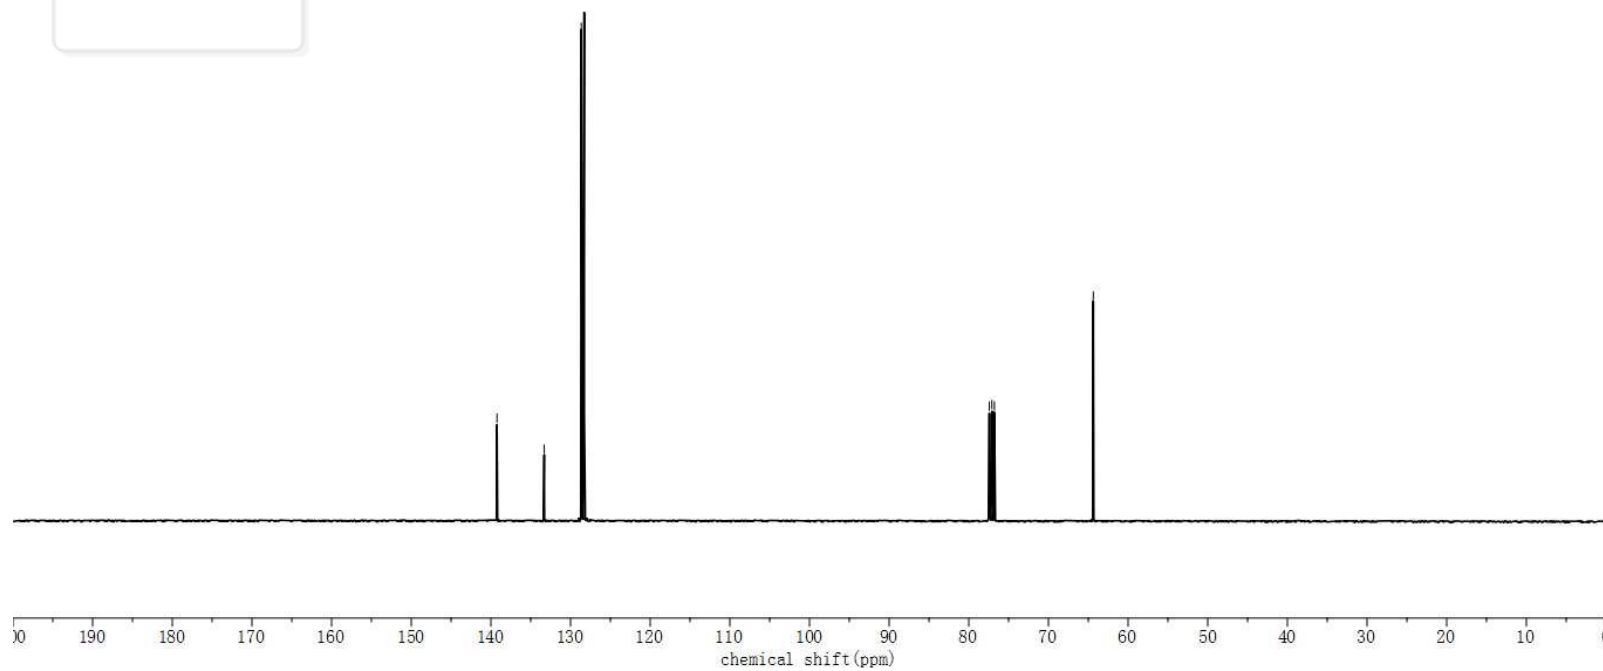

JWJ-2024-435

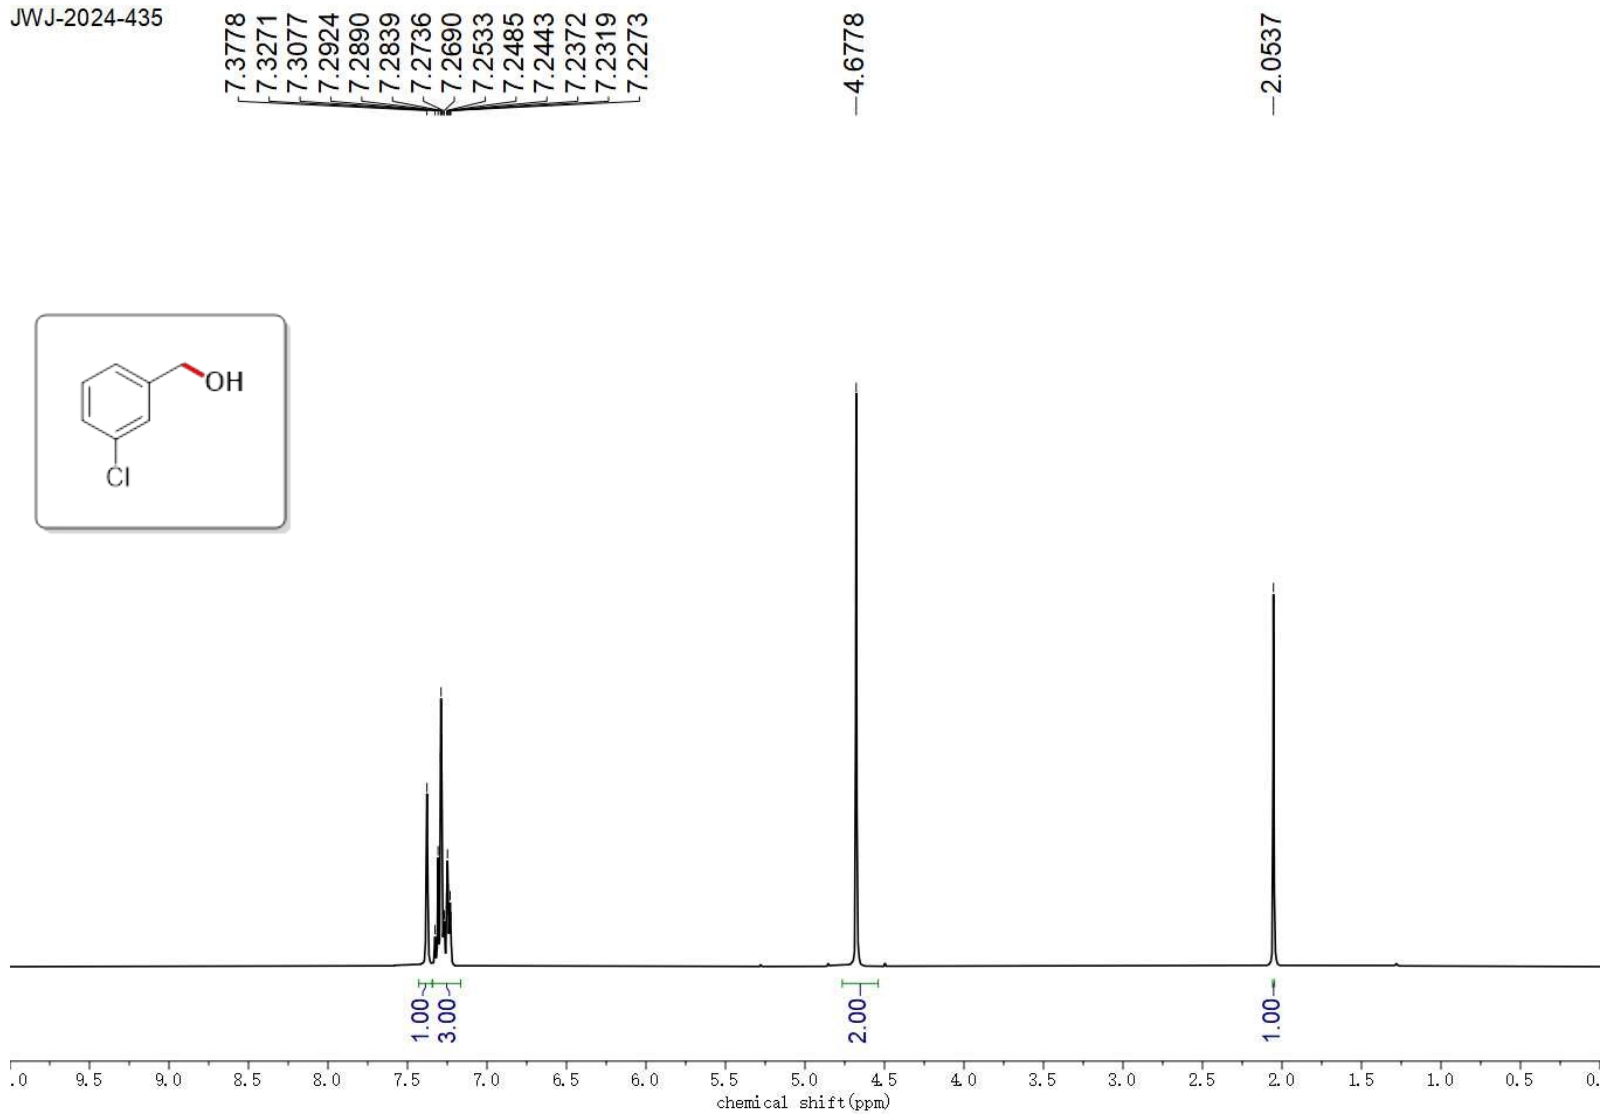

JWJ-2024-435

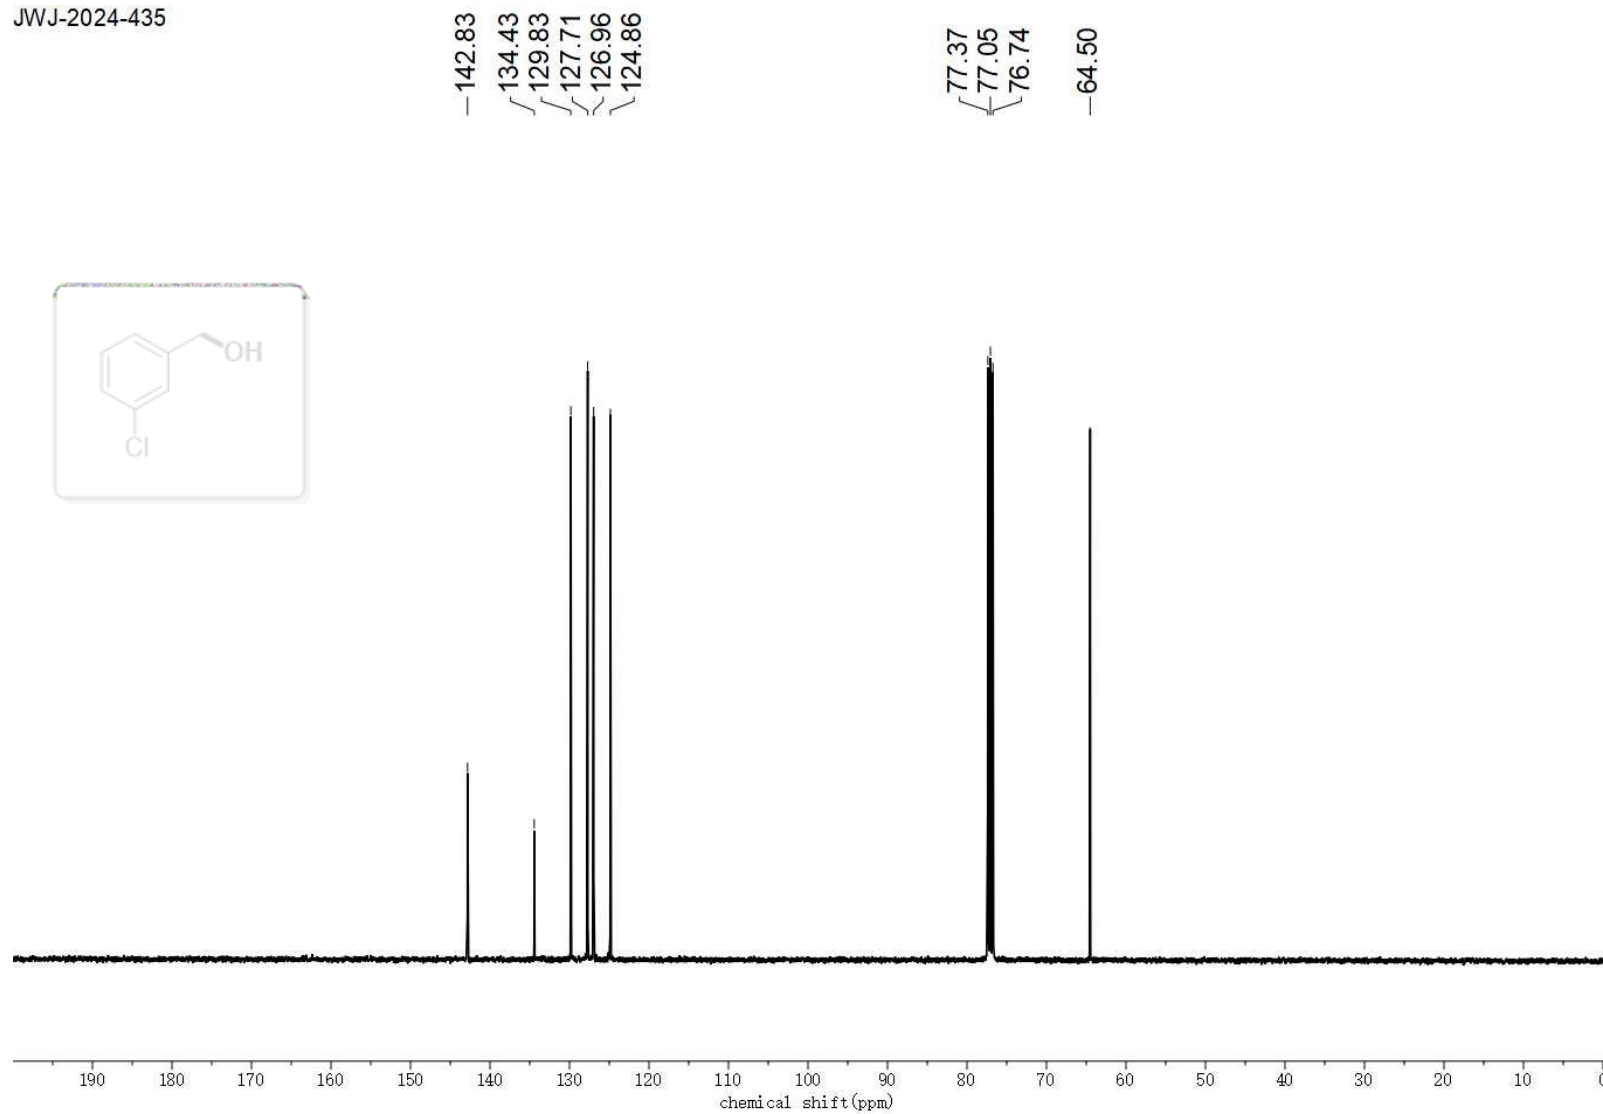

JWJ-2024-204

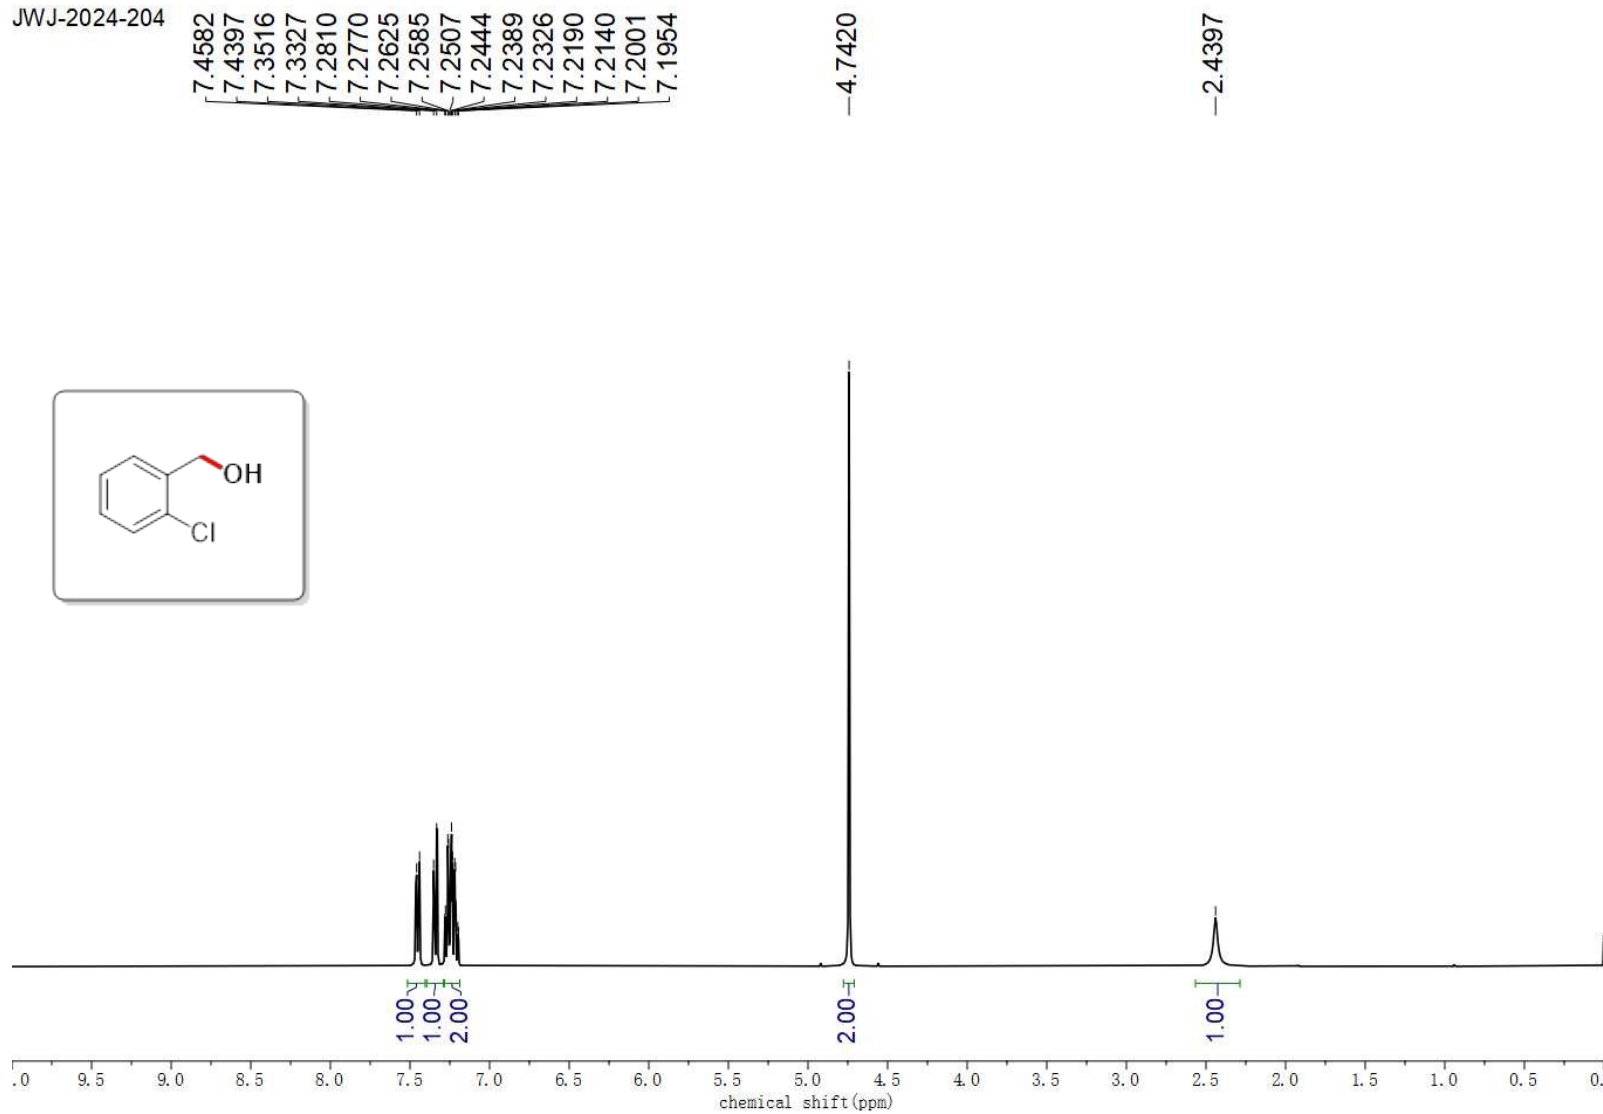

JWJ-2024-204

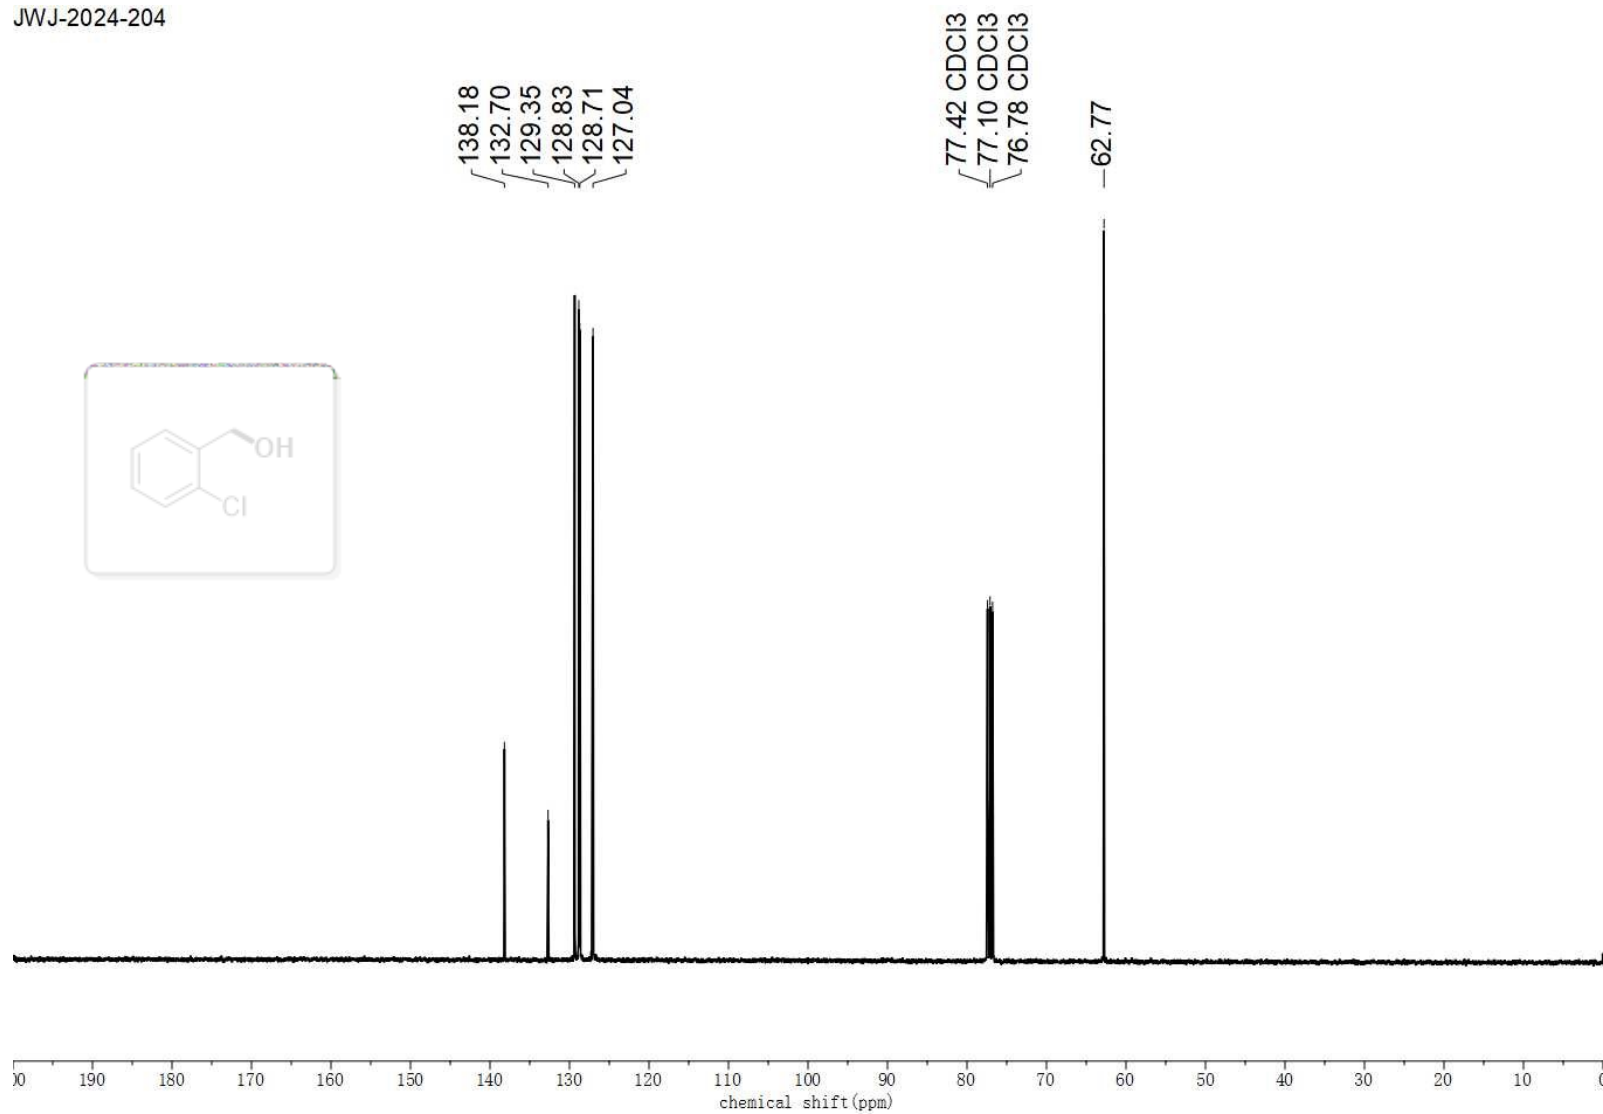



JWJ-2024-219

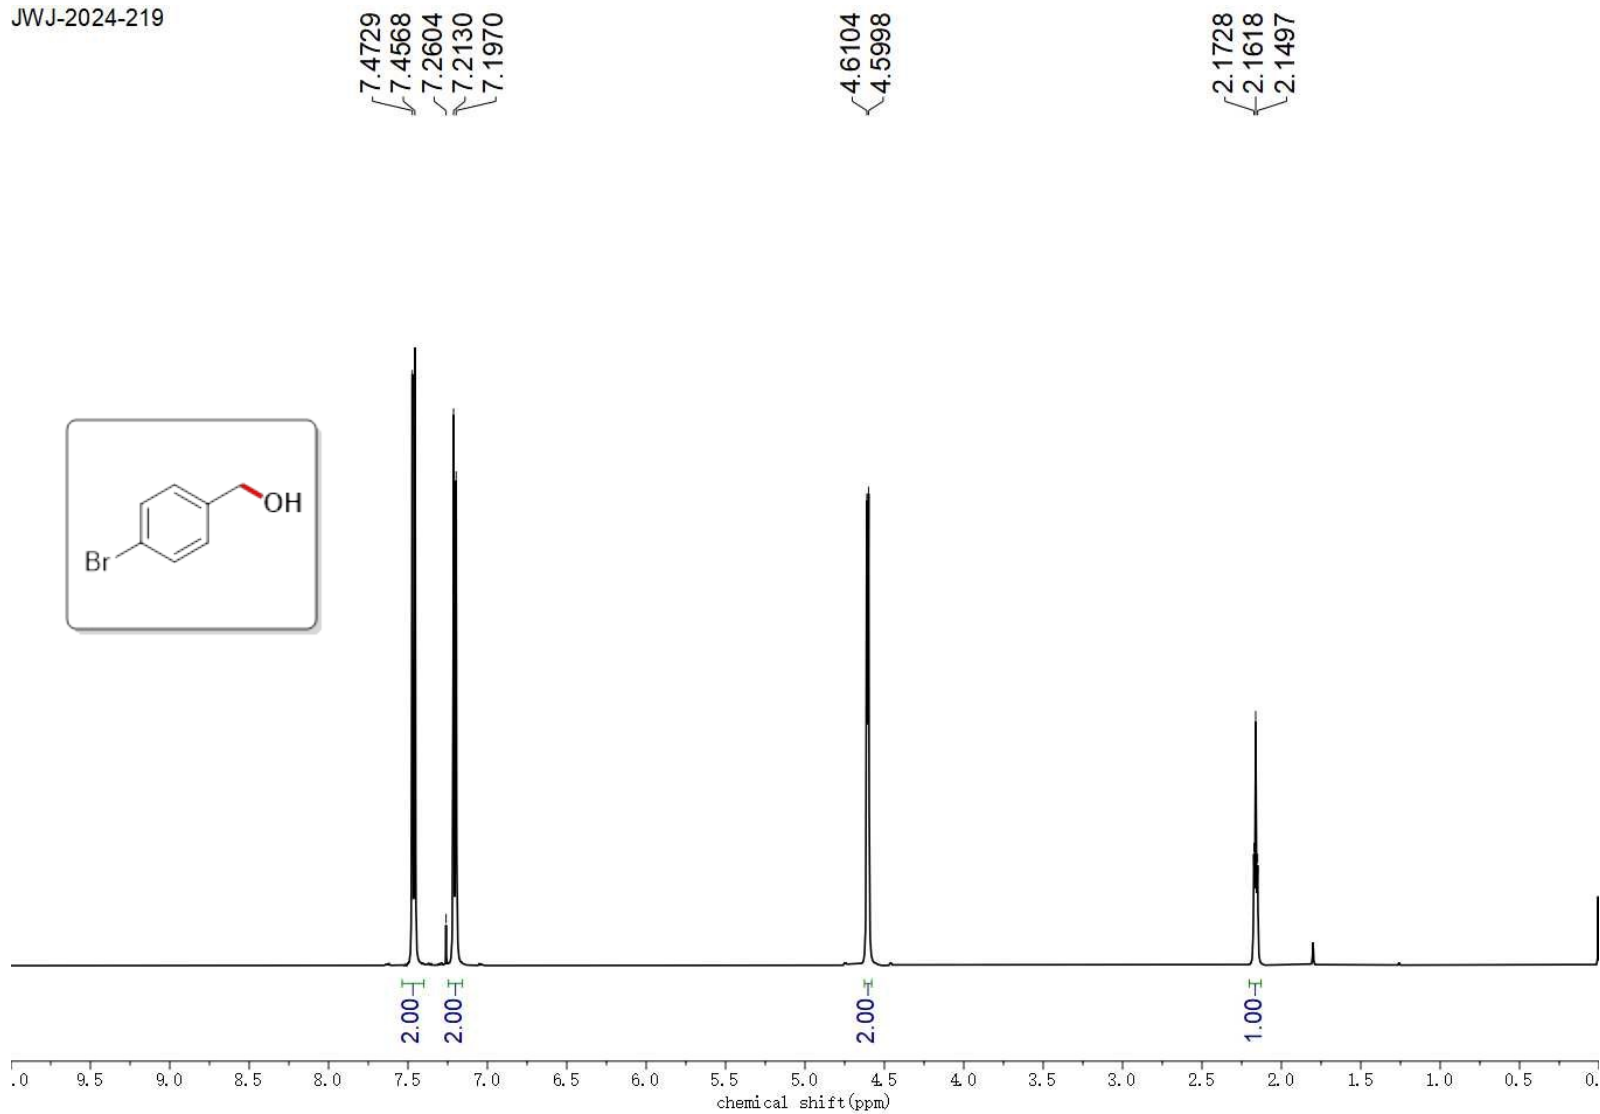

JWJ-2024-219

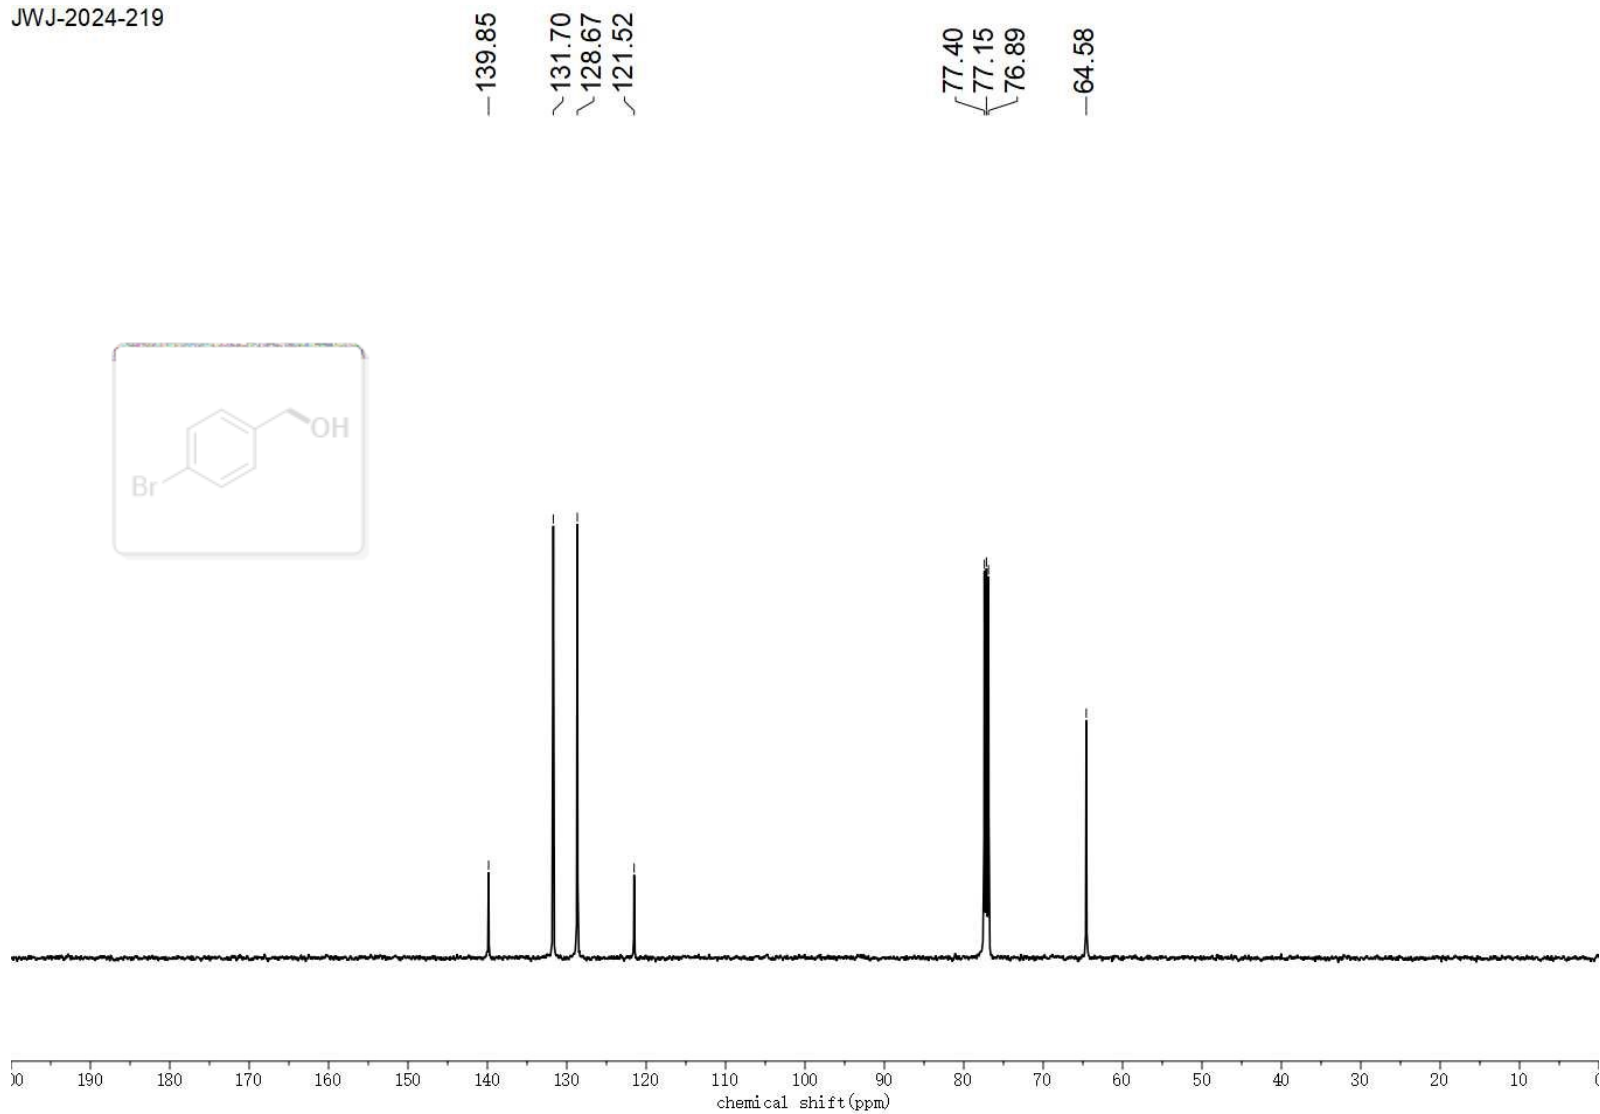

JWJ-2024-209

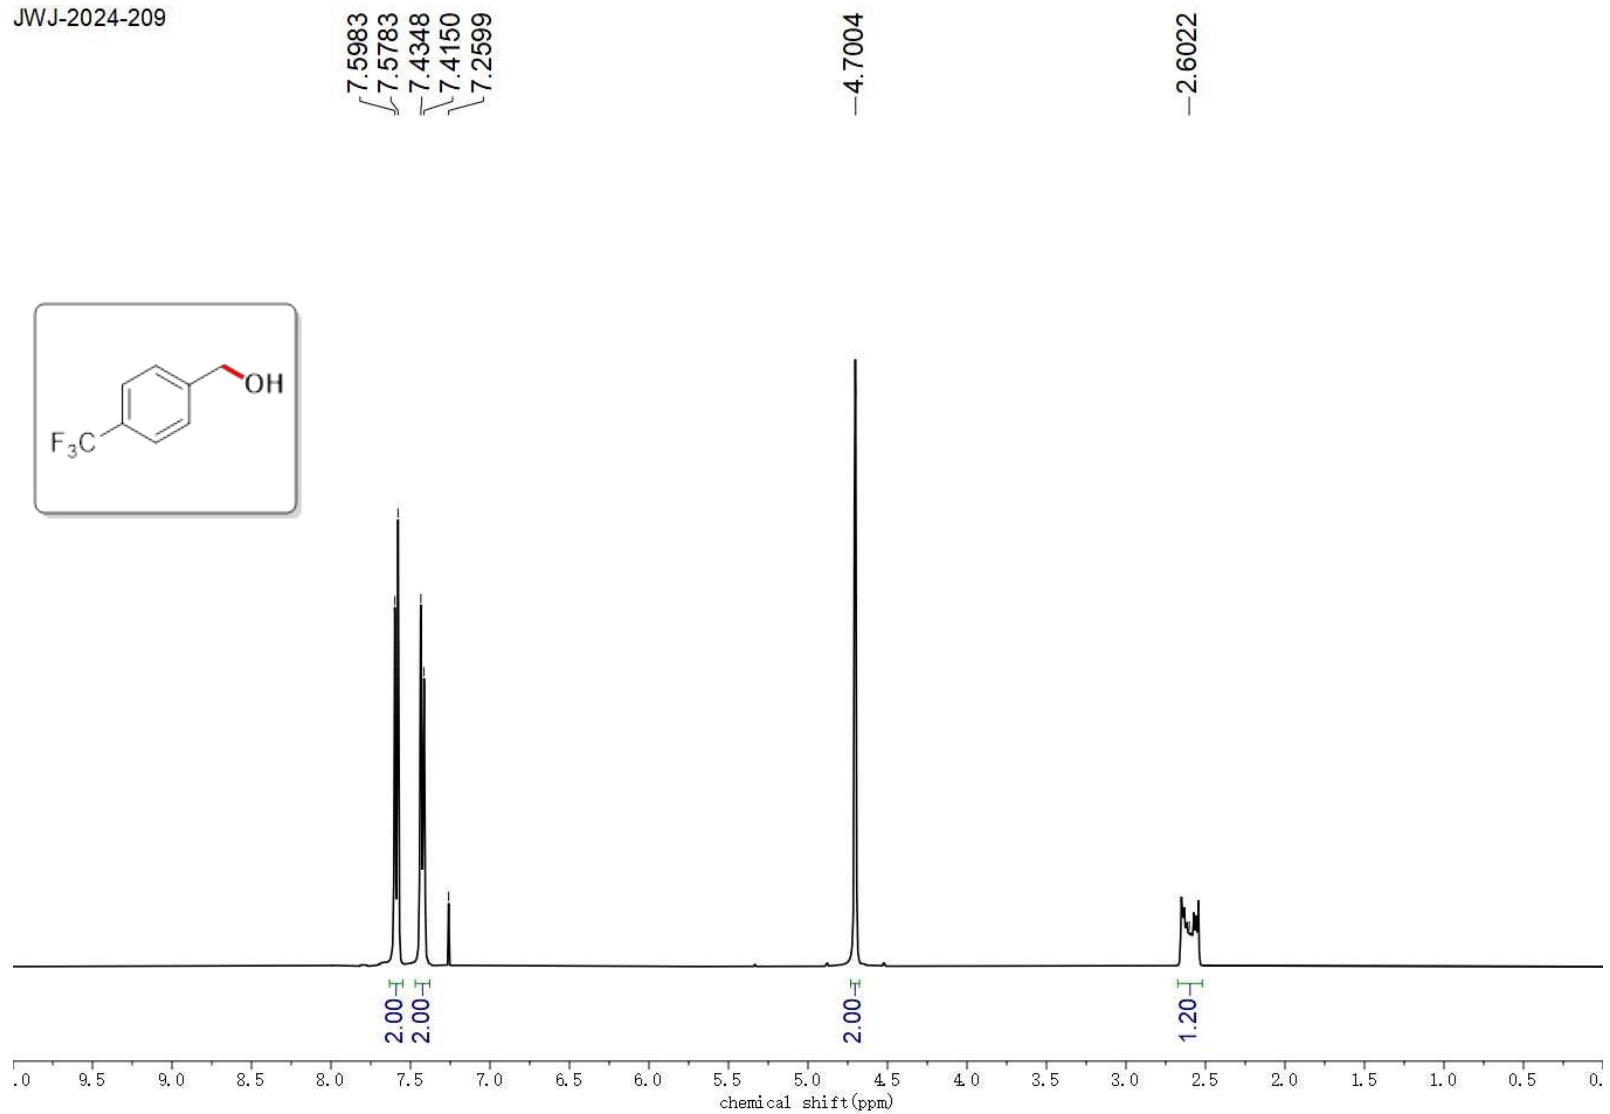

JWJ-2024-209

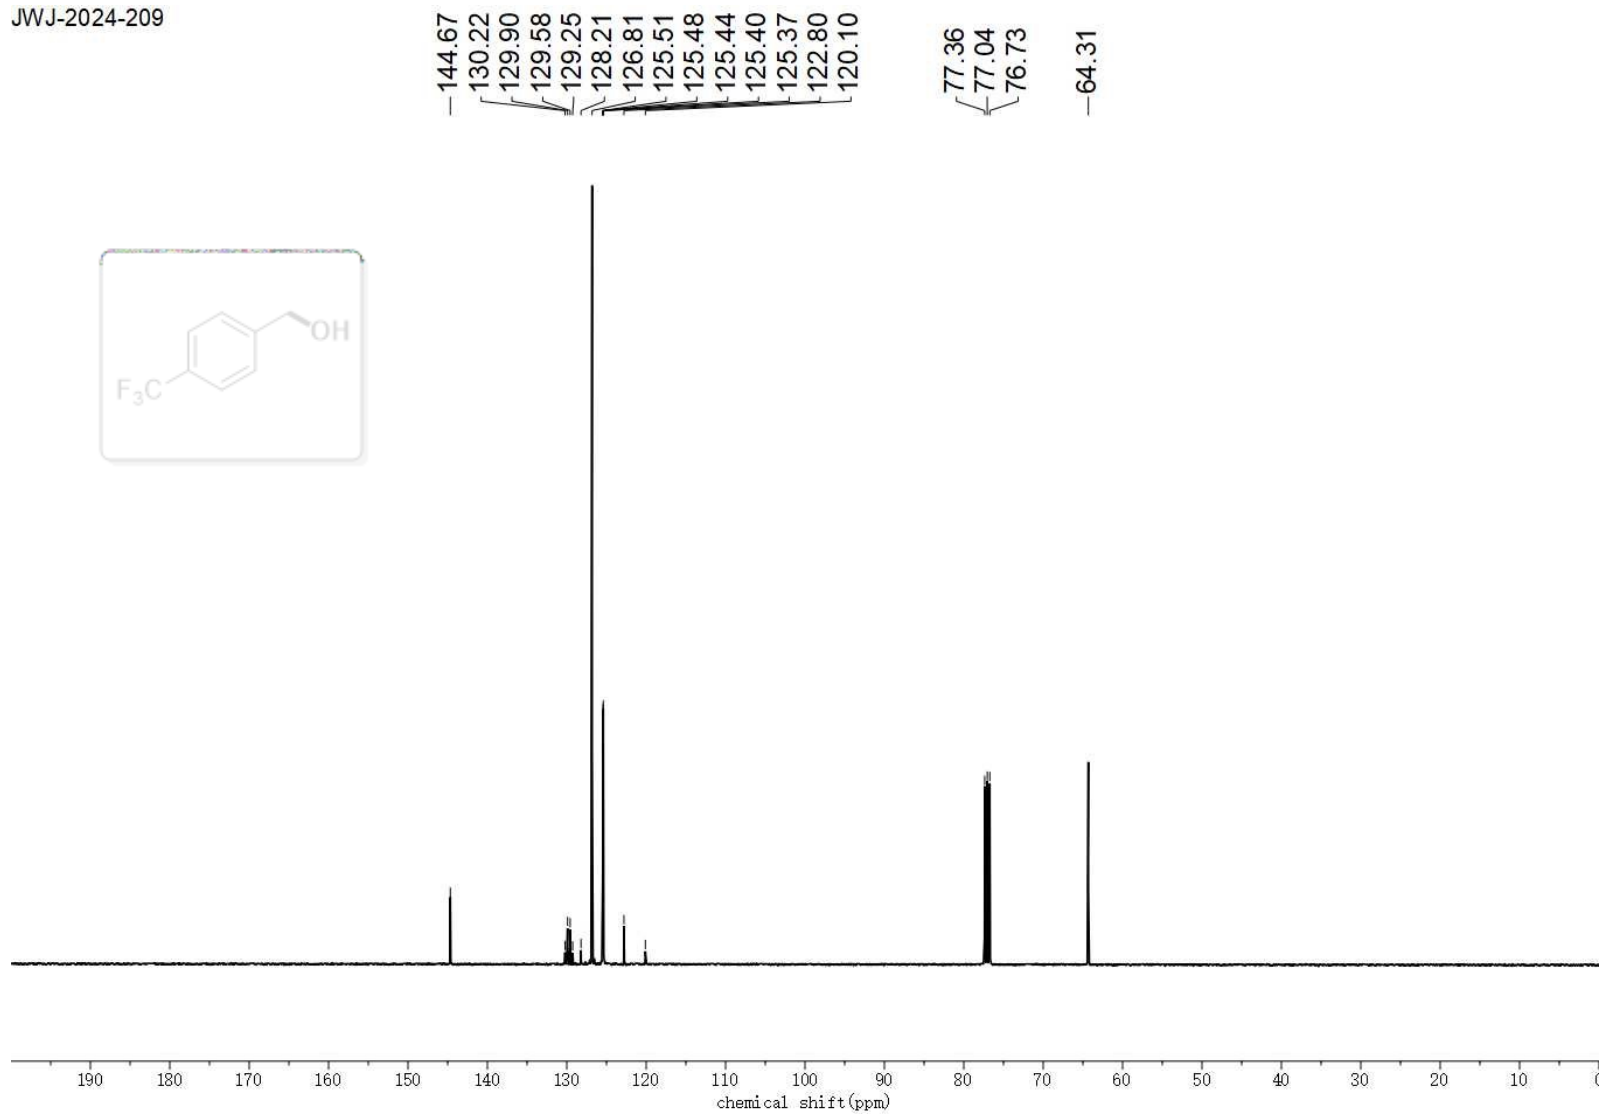

JWJ-2024-209

—62.50

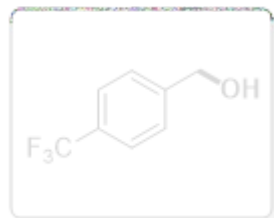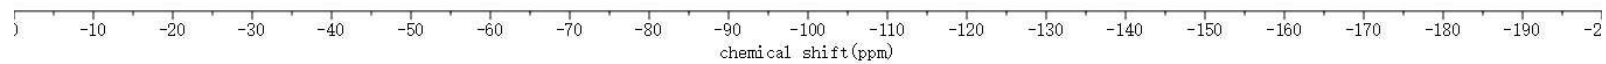

JWJ-2024-215

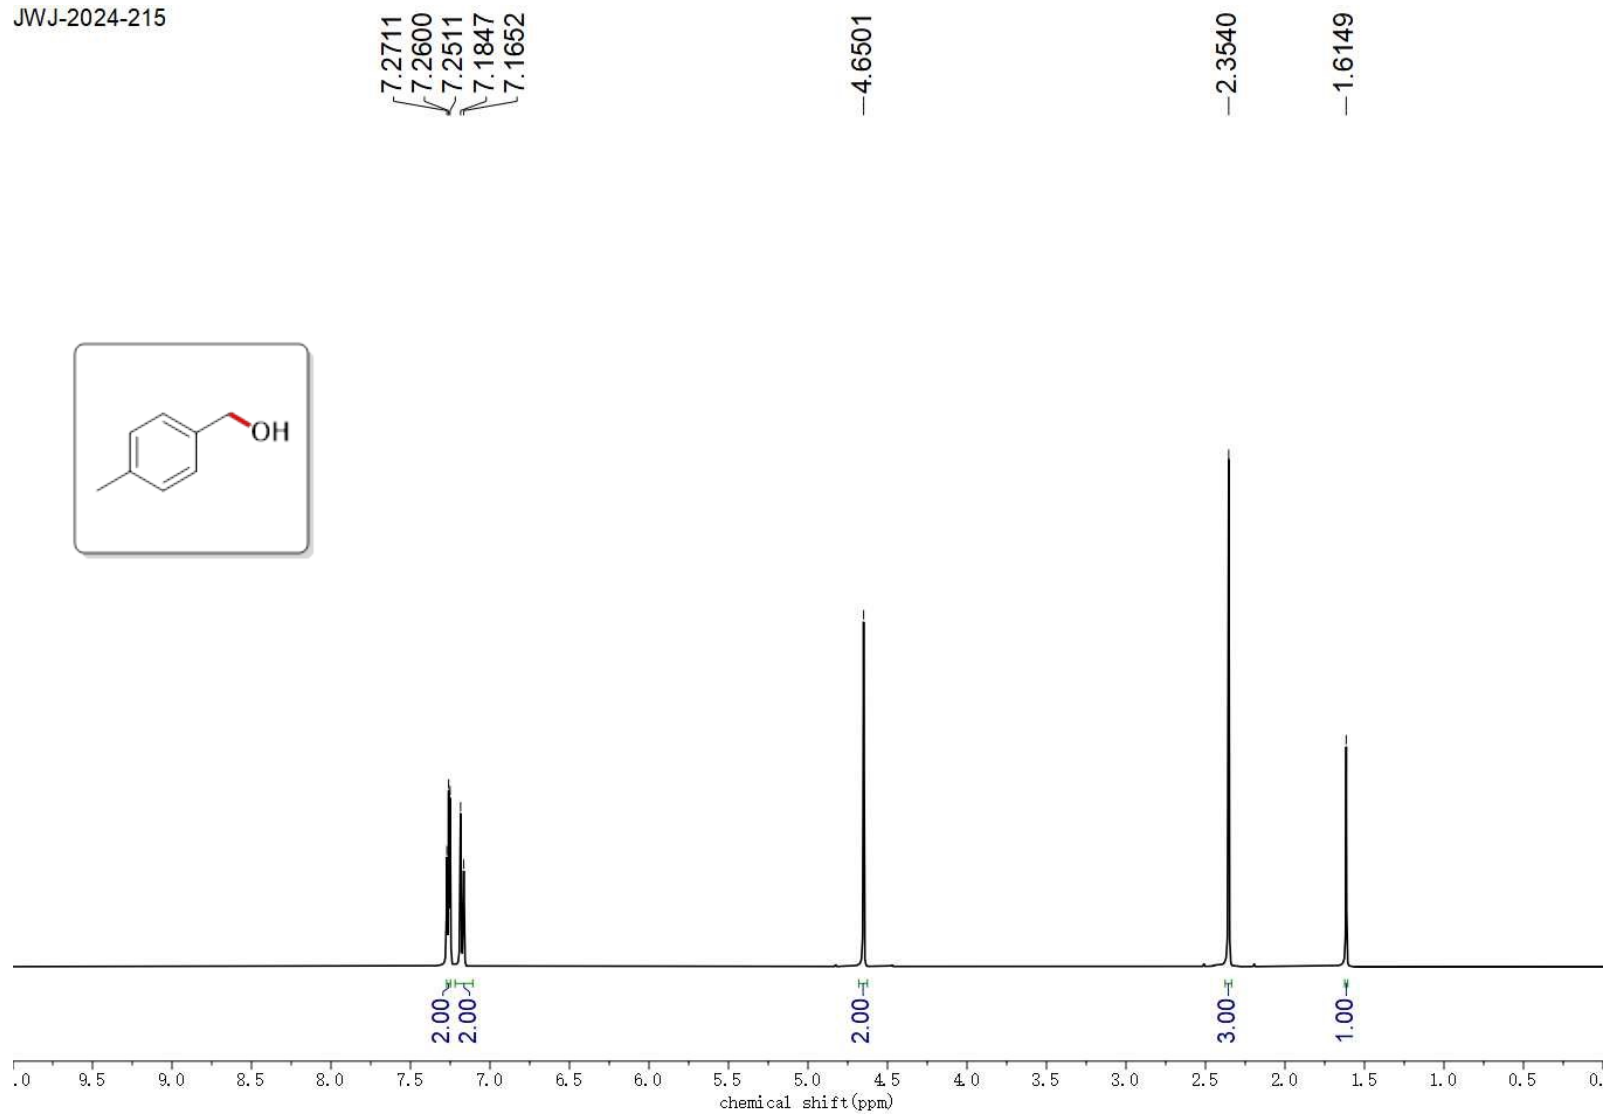

JWJ-2024-215

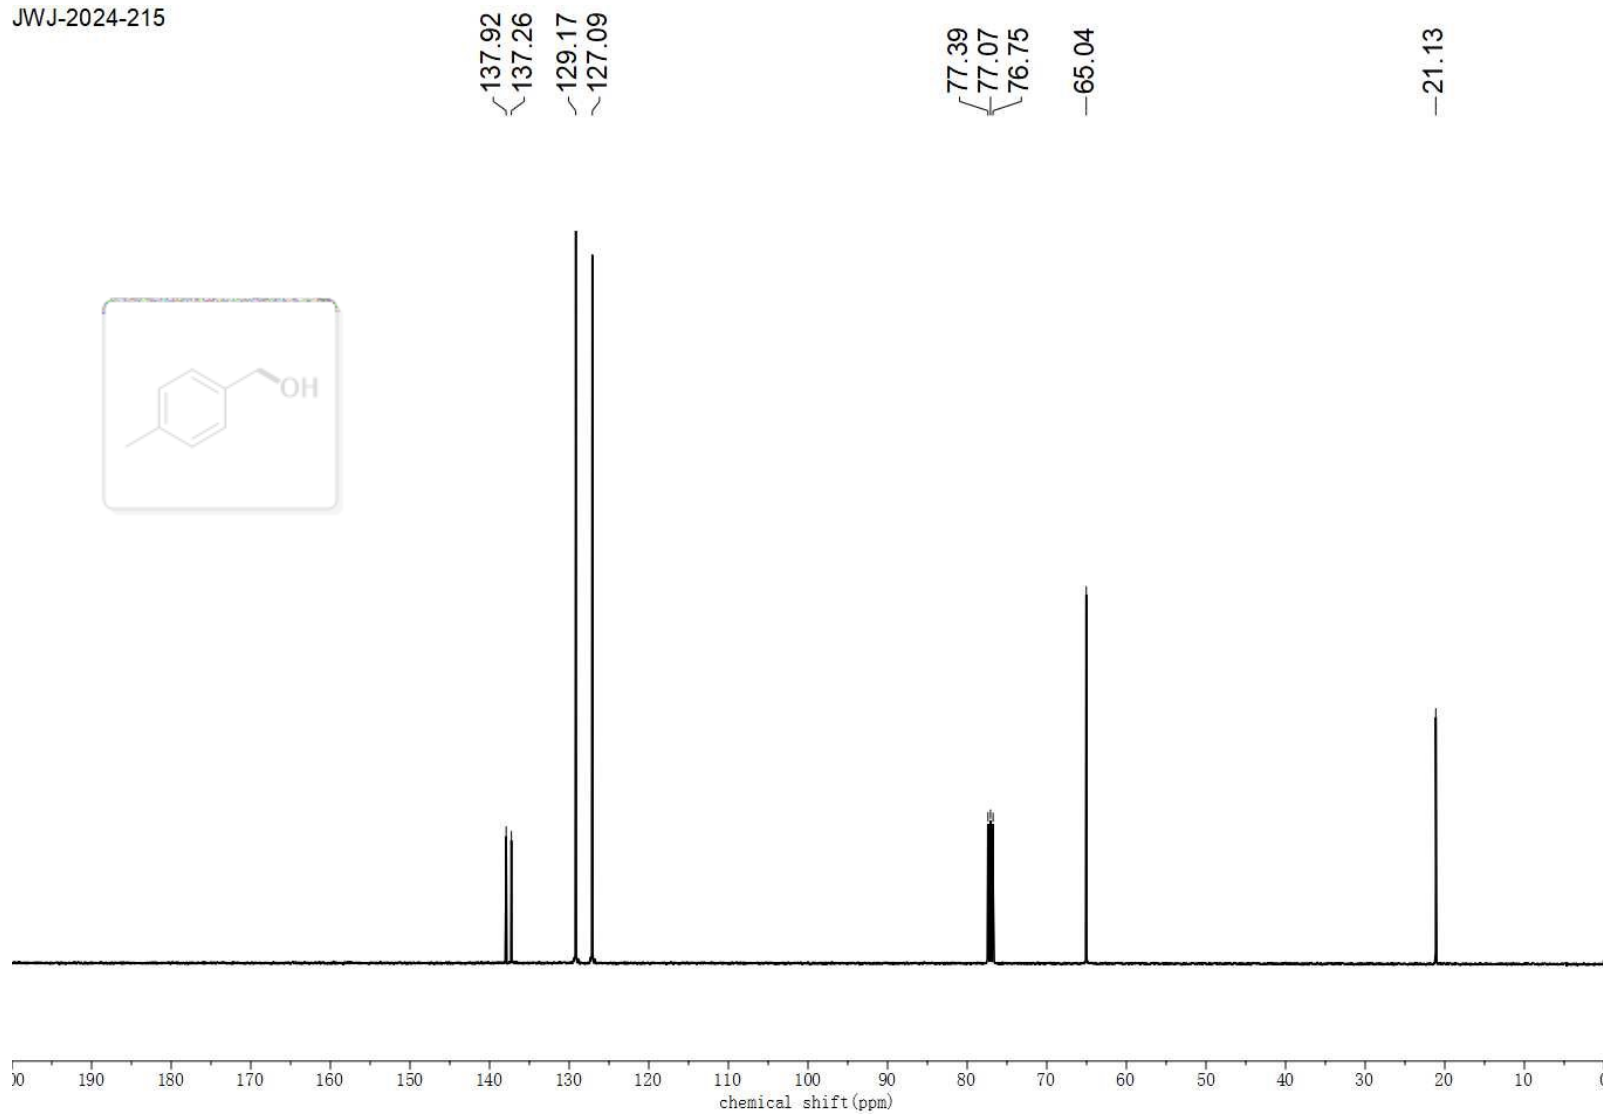

JWJ-2024-213

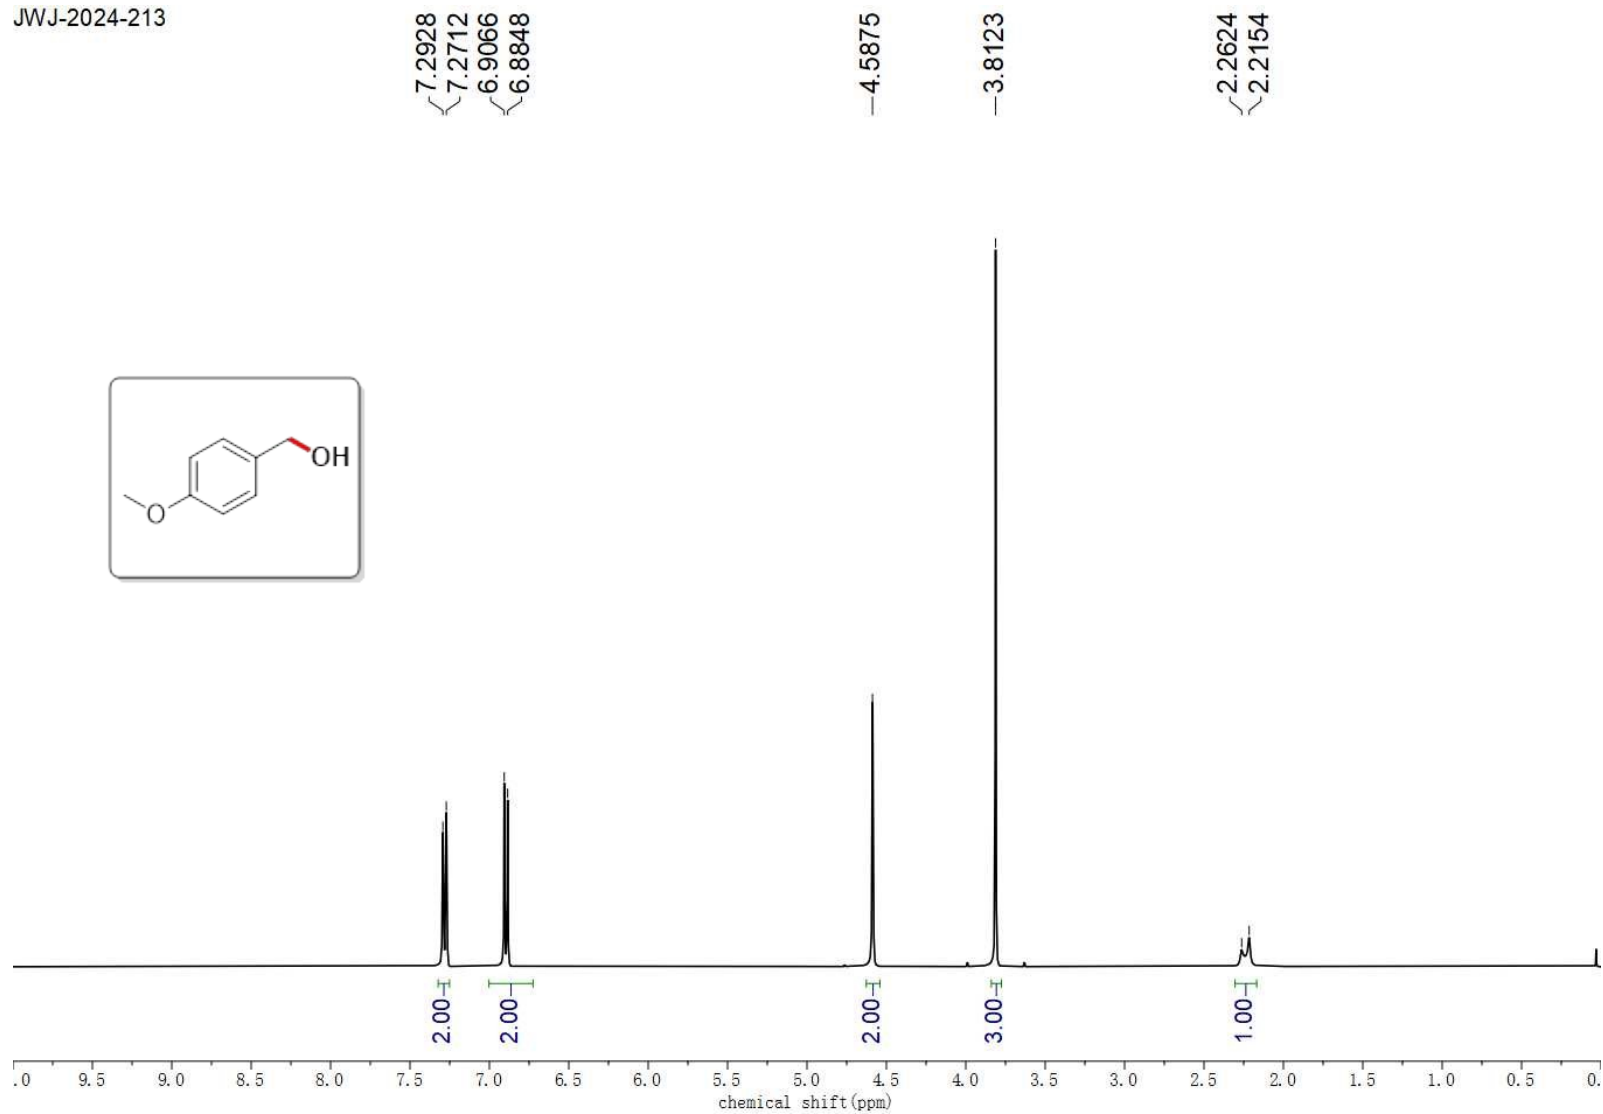



JWJ-2024-213

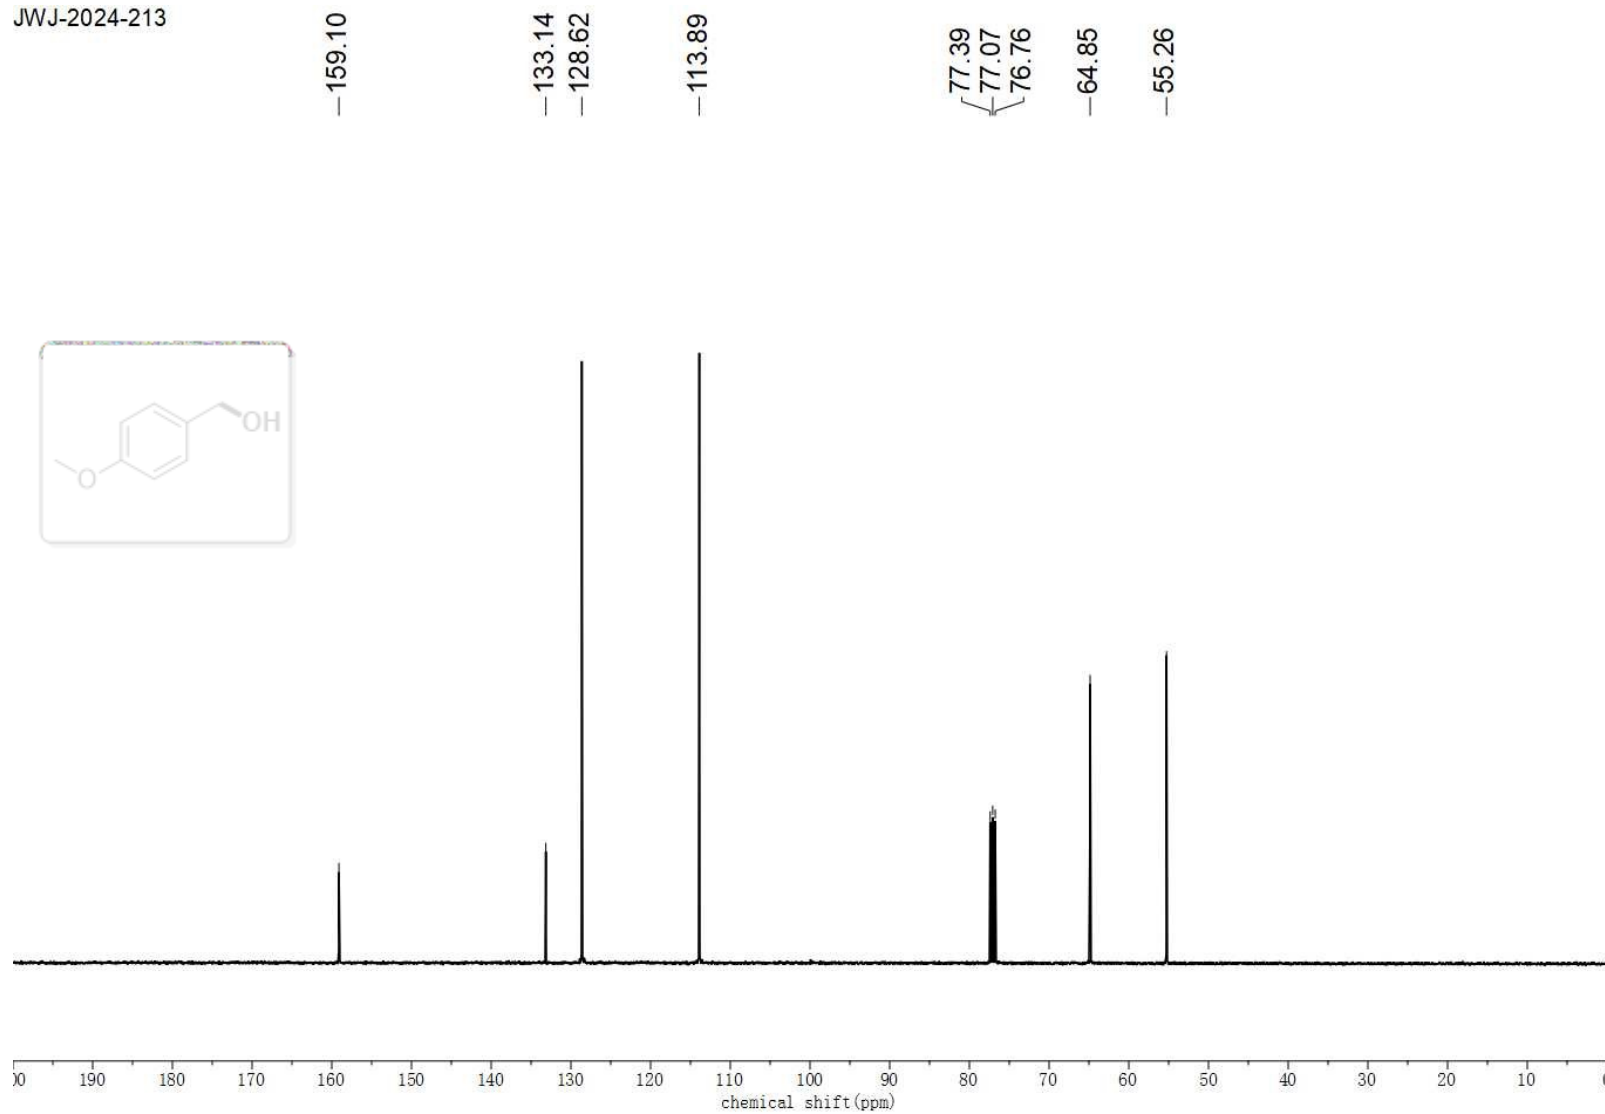

JWJ-2024-189

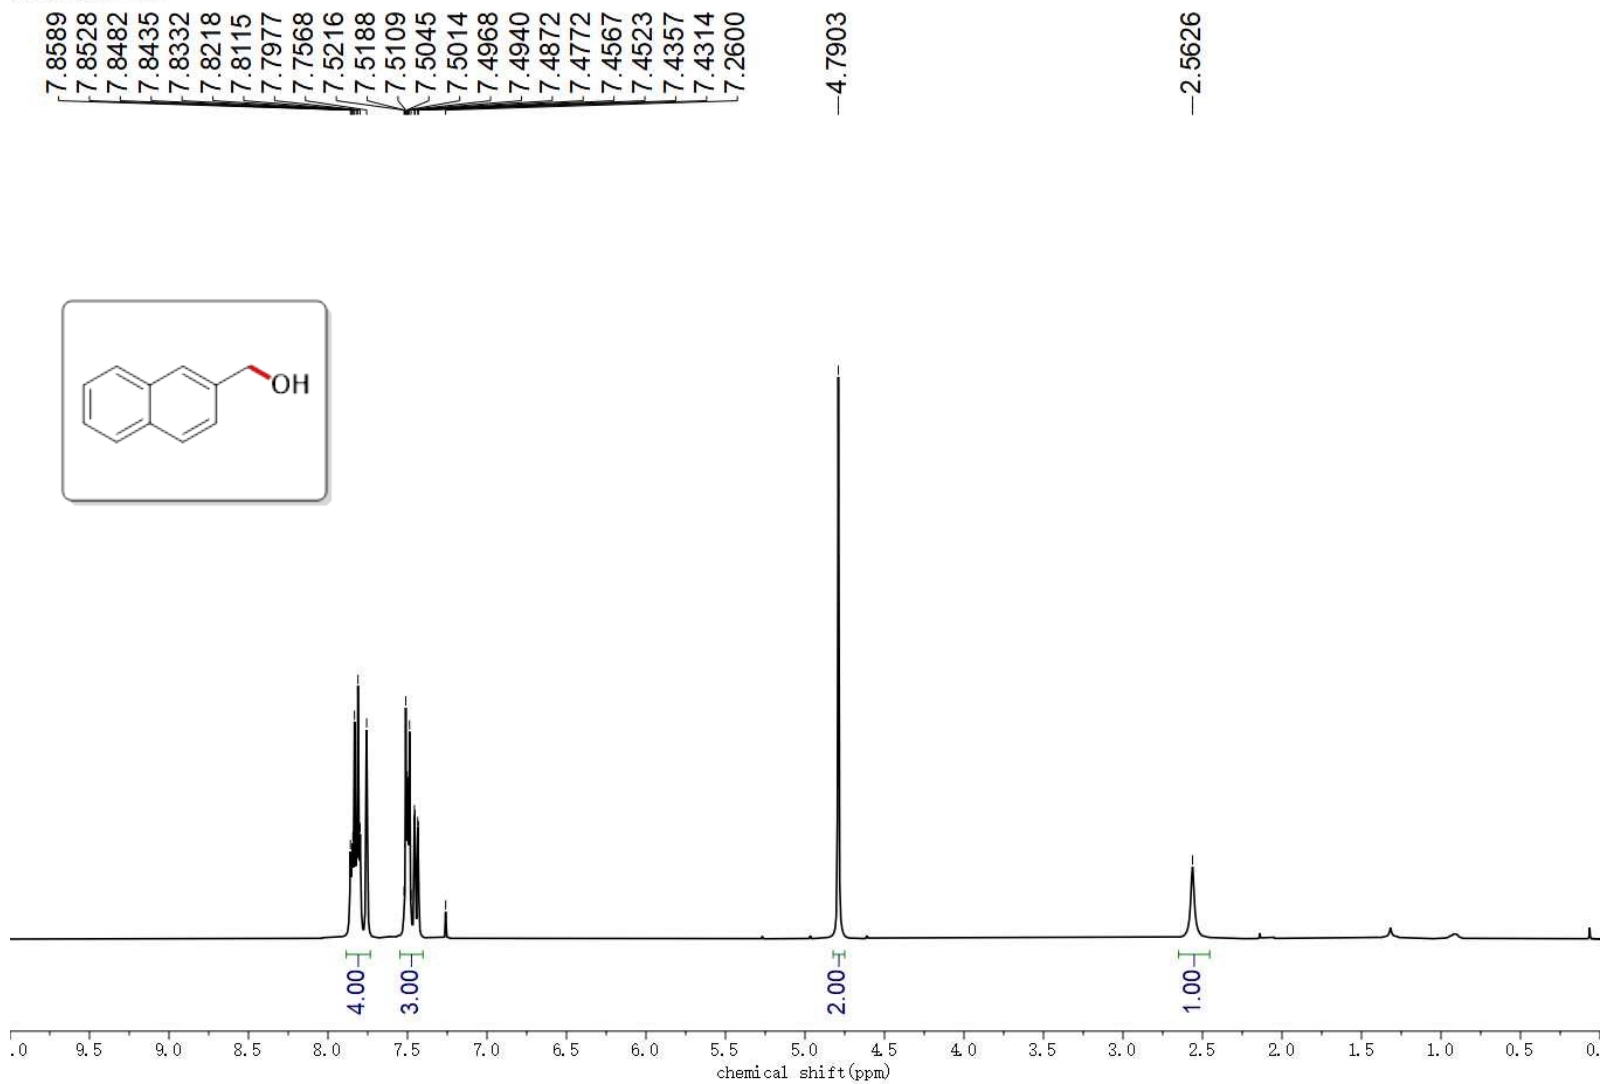

JWJ-2024-189

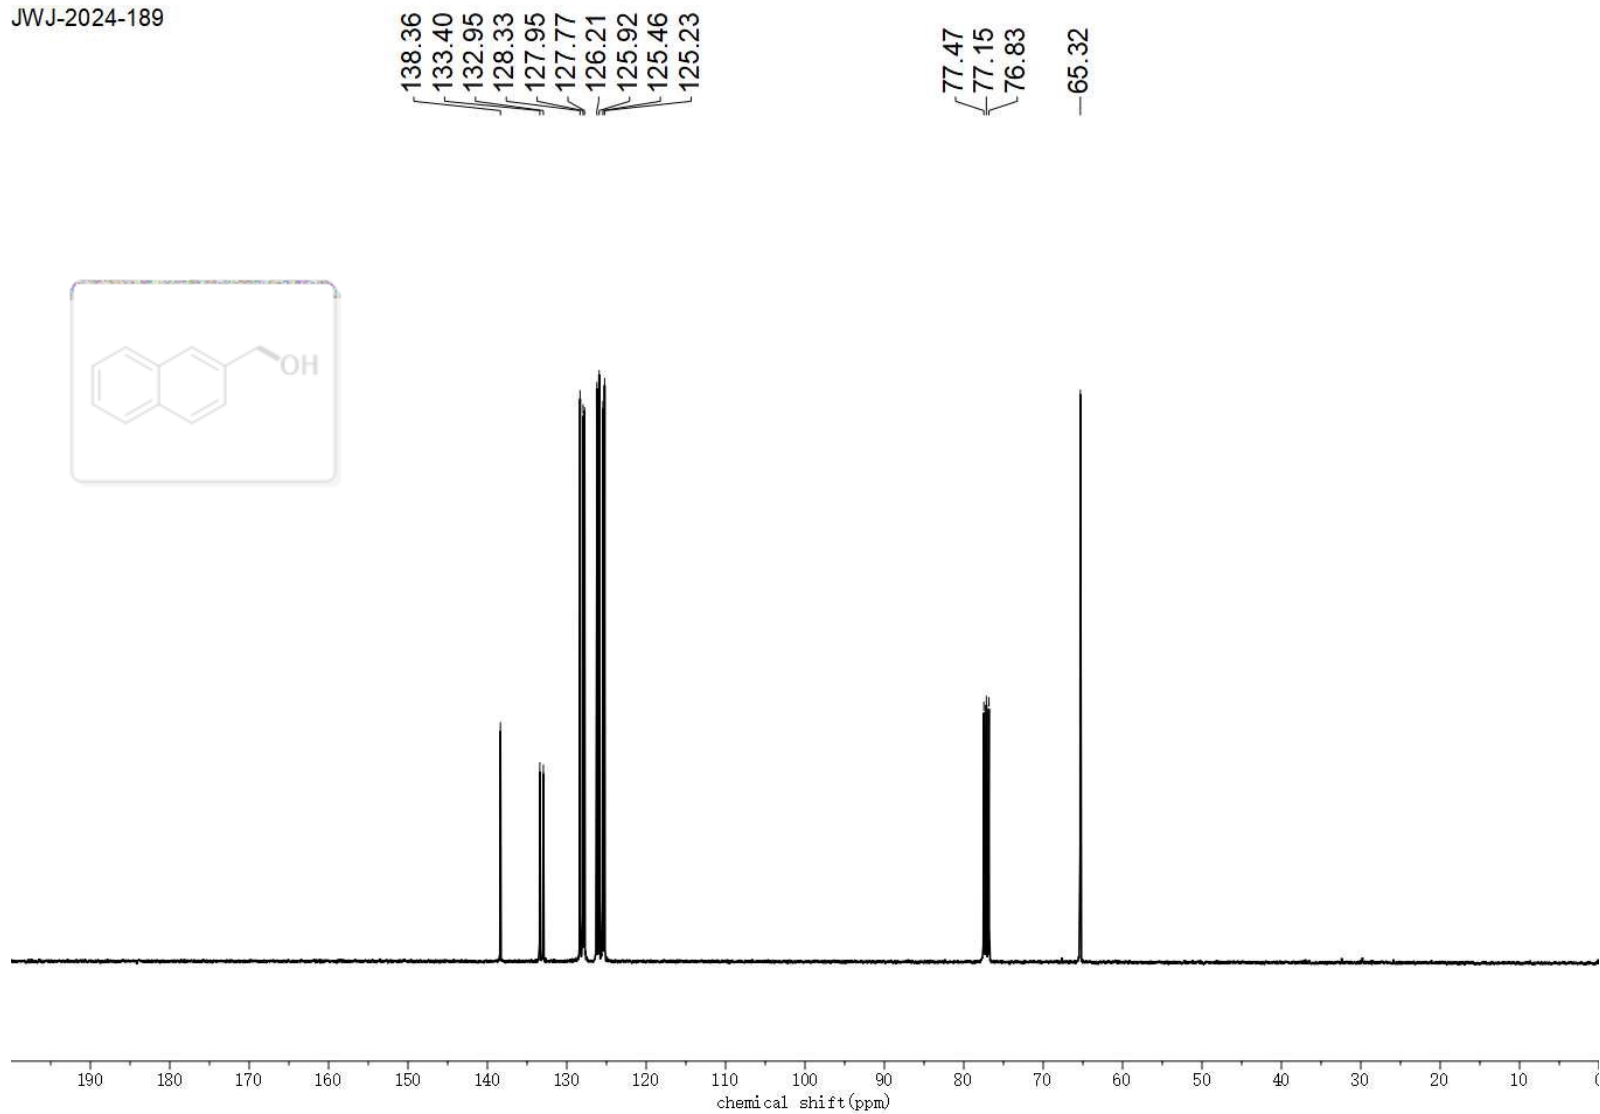

JWJ-2024-244

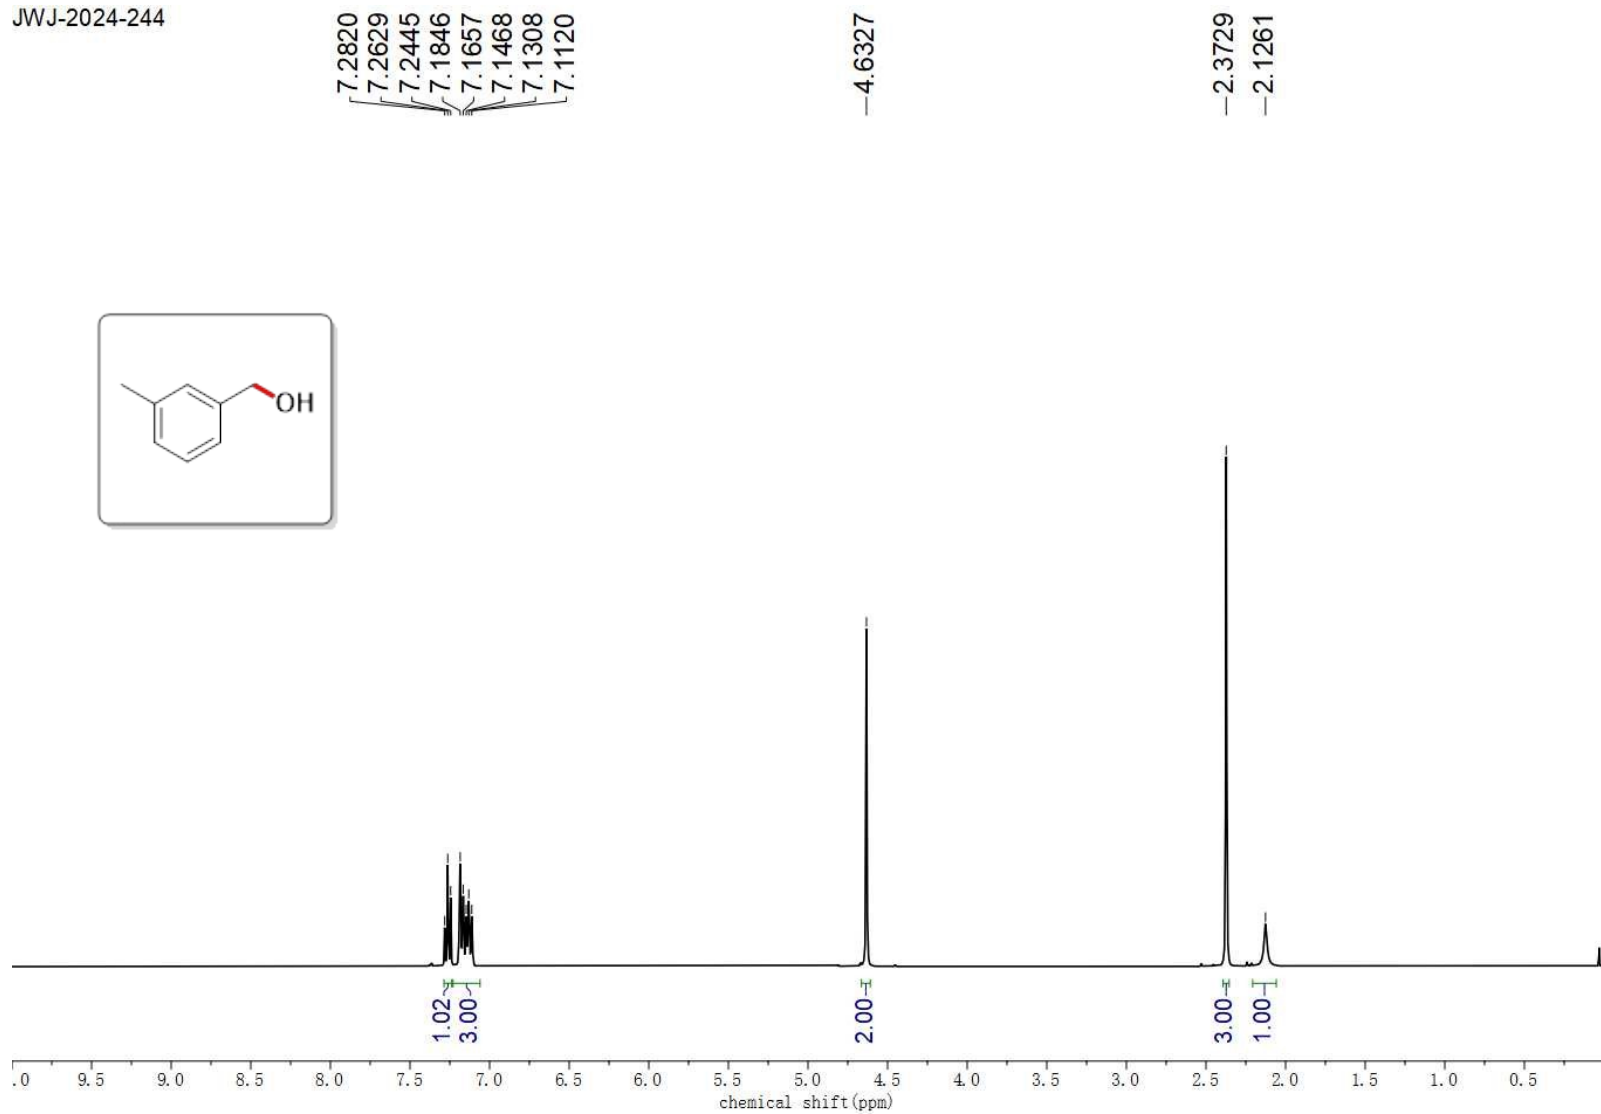

JWJ-2024-244

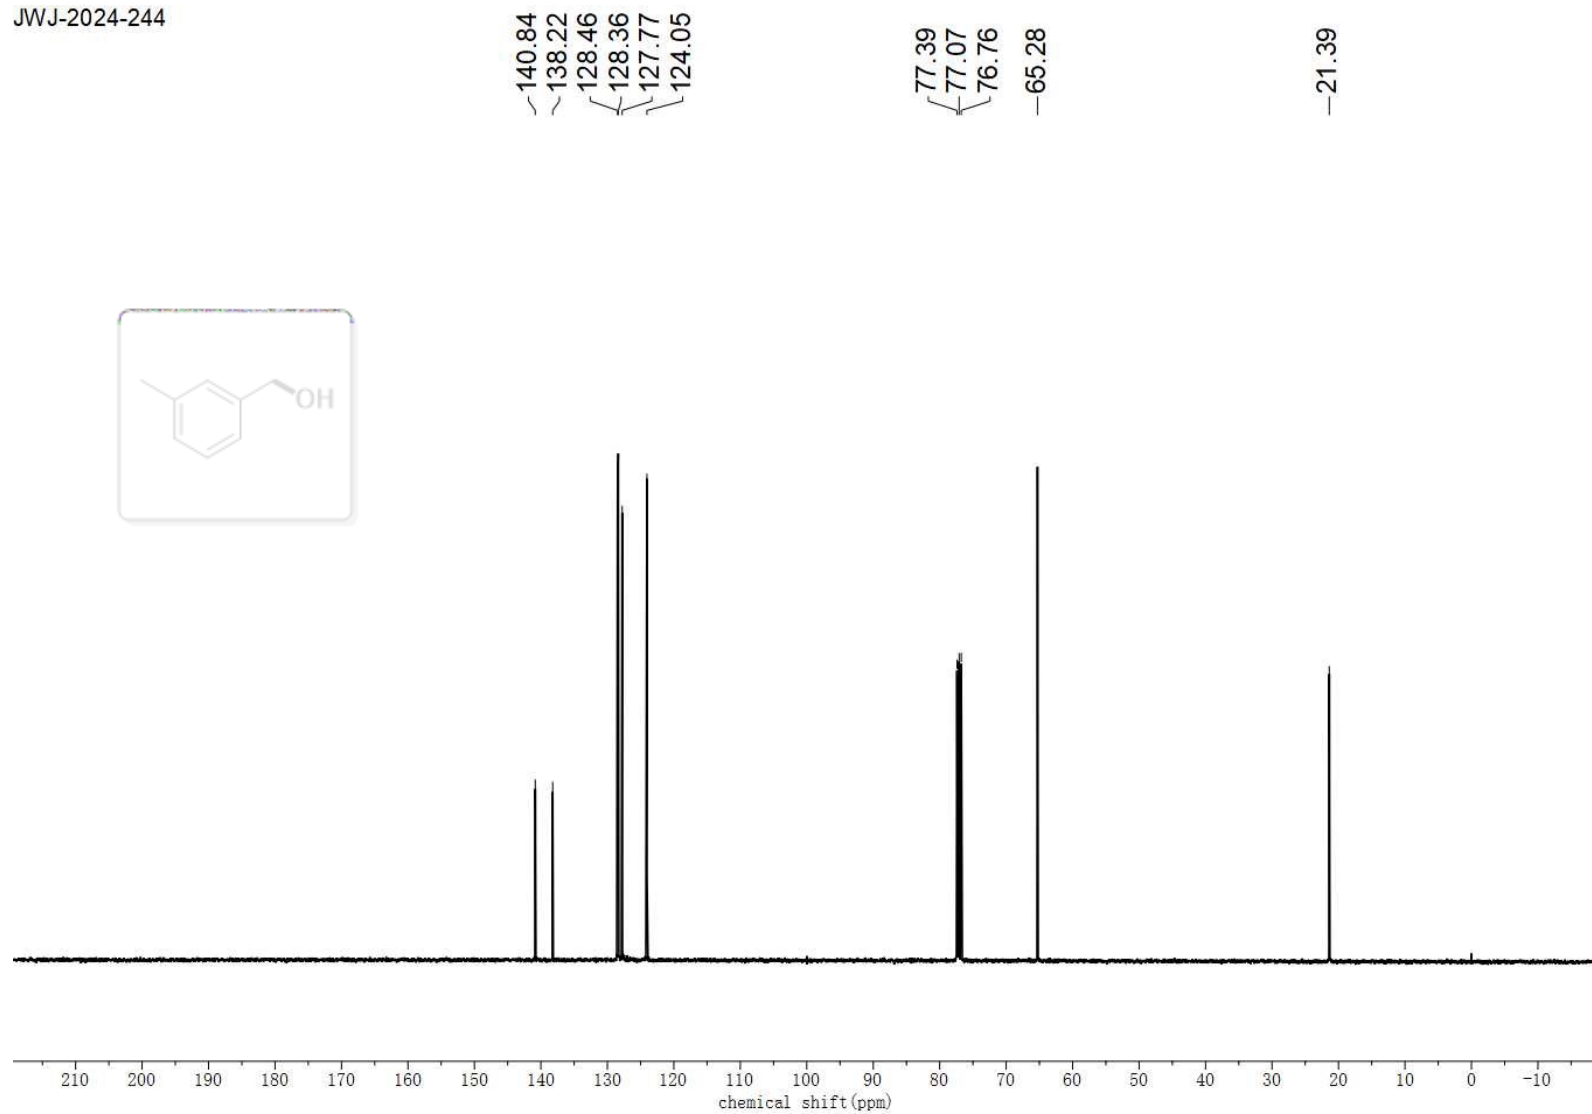

JWJ-2024-428

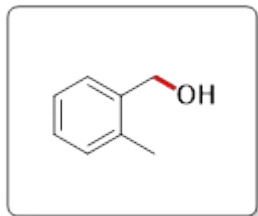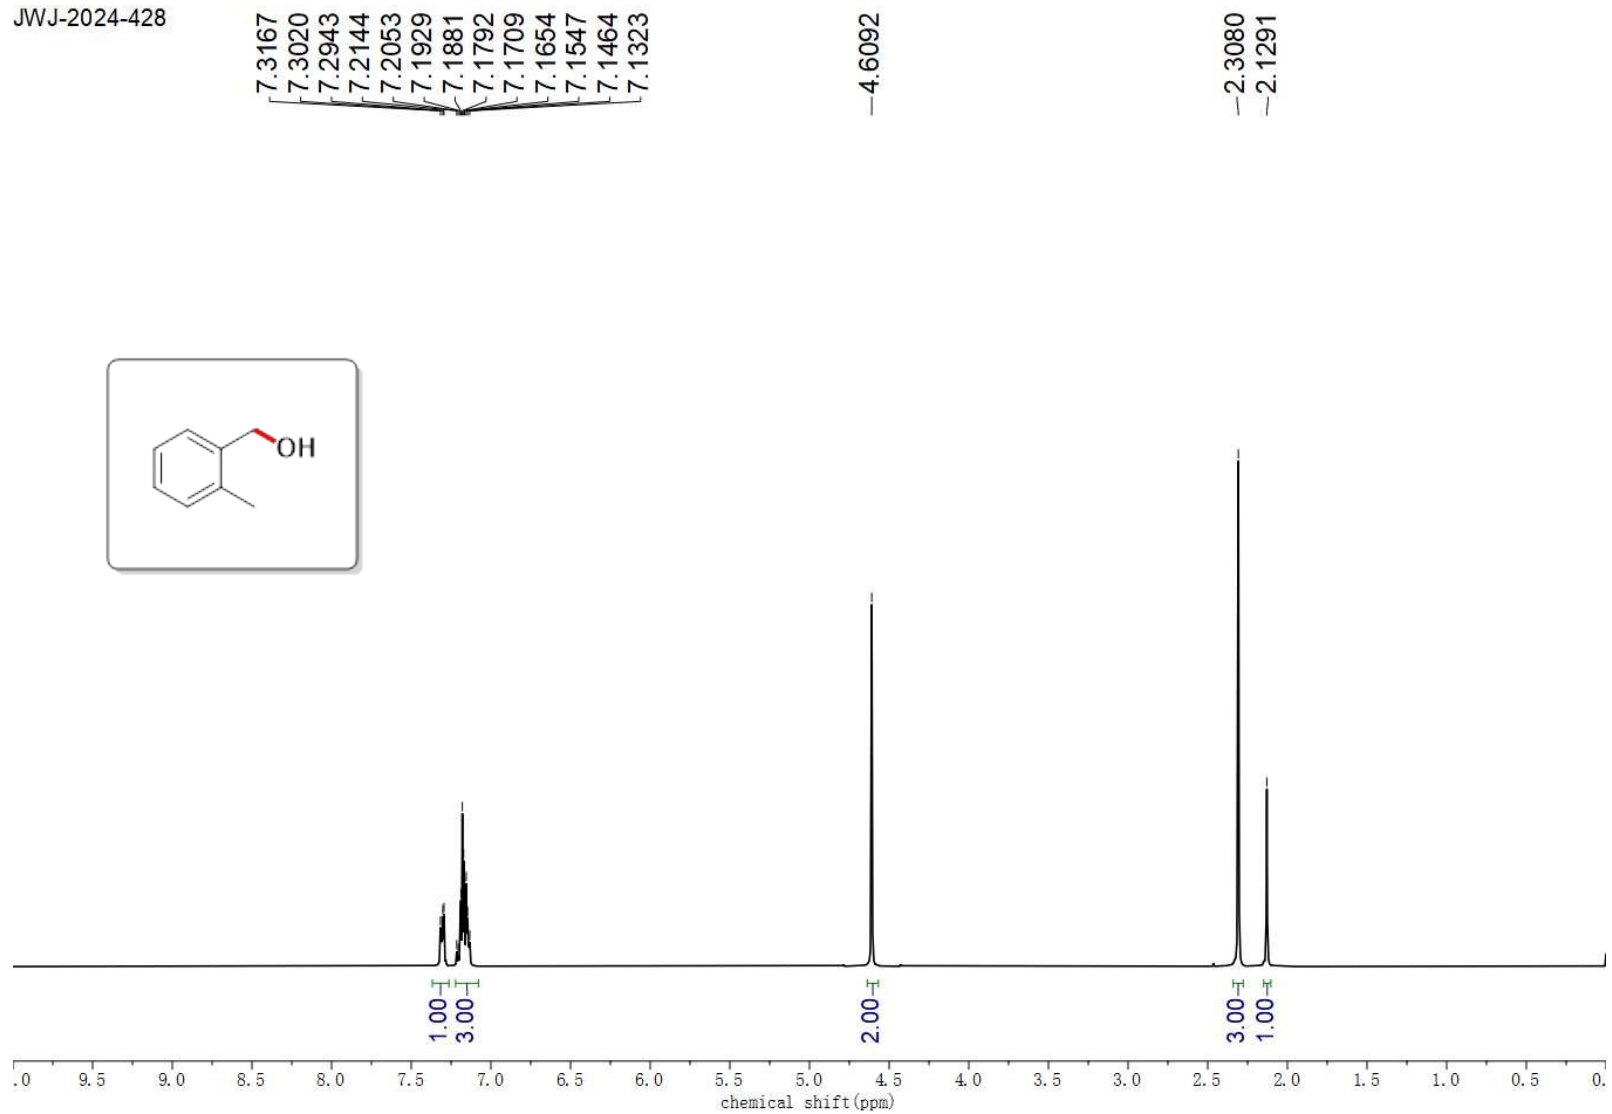

JWJ-2024-428

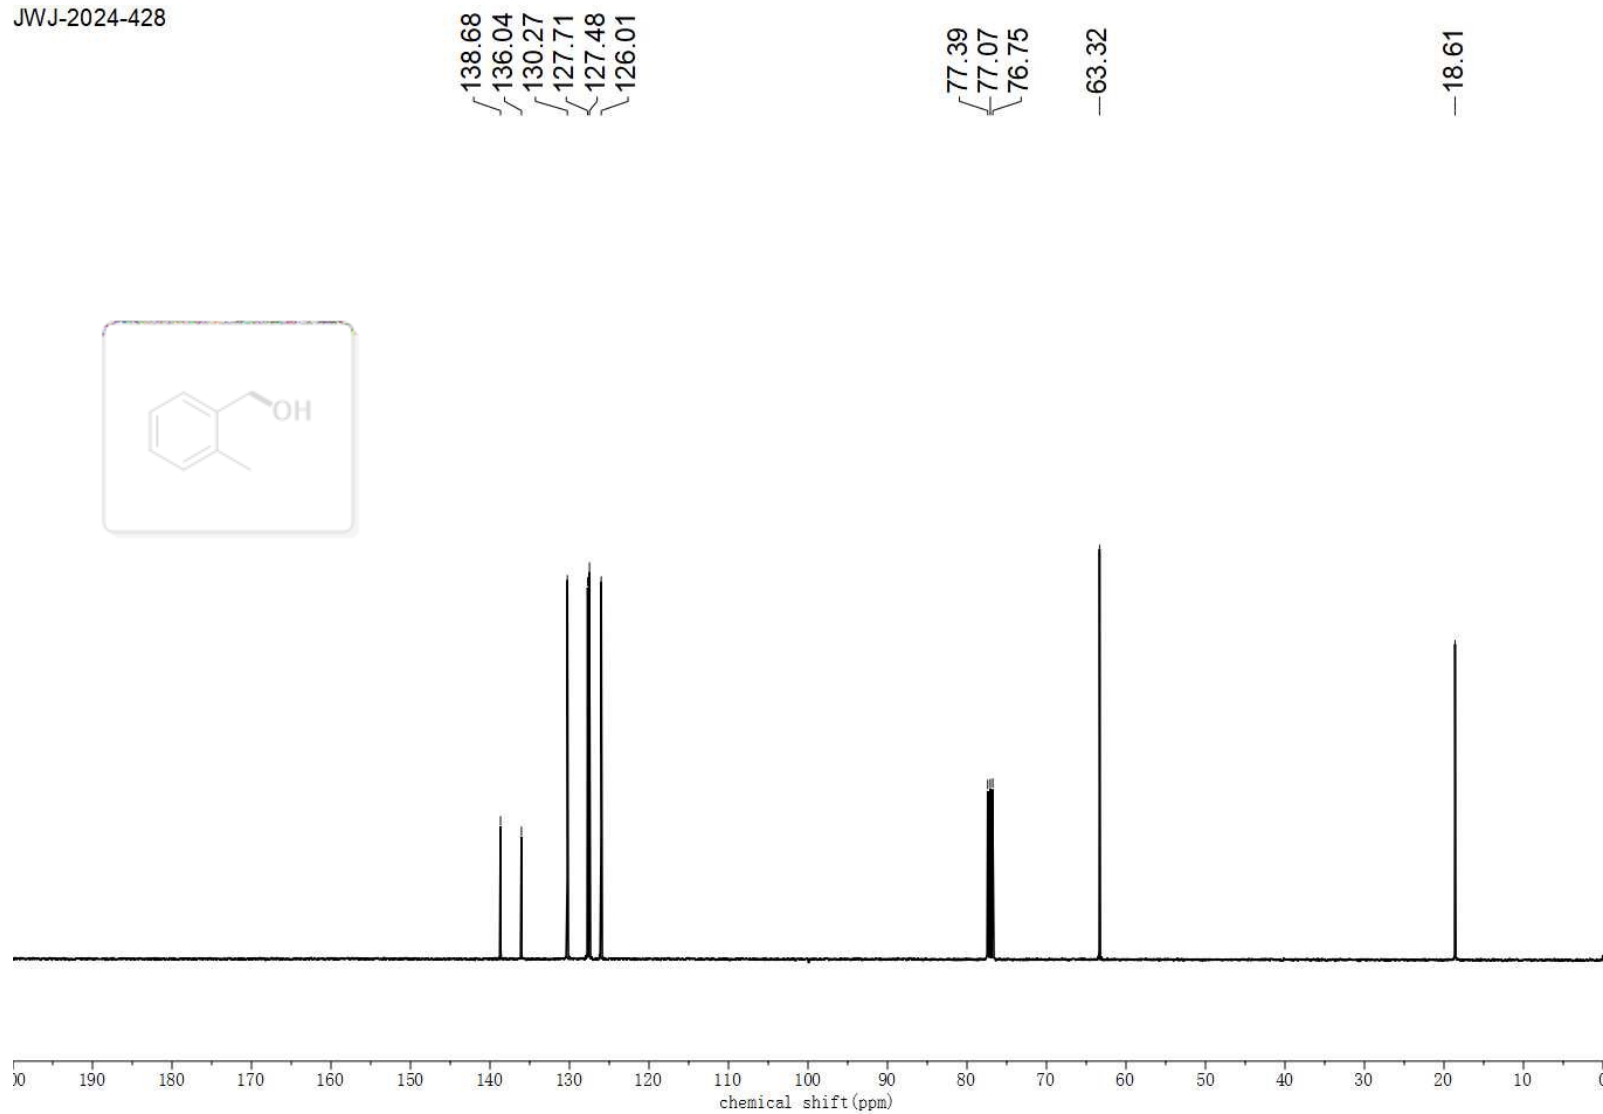

JWJ-2024-434

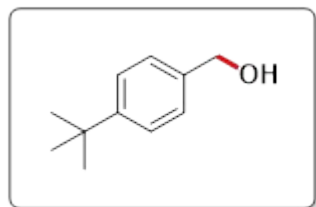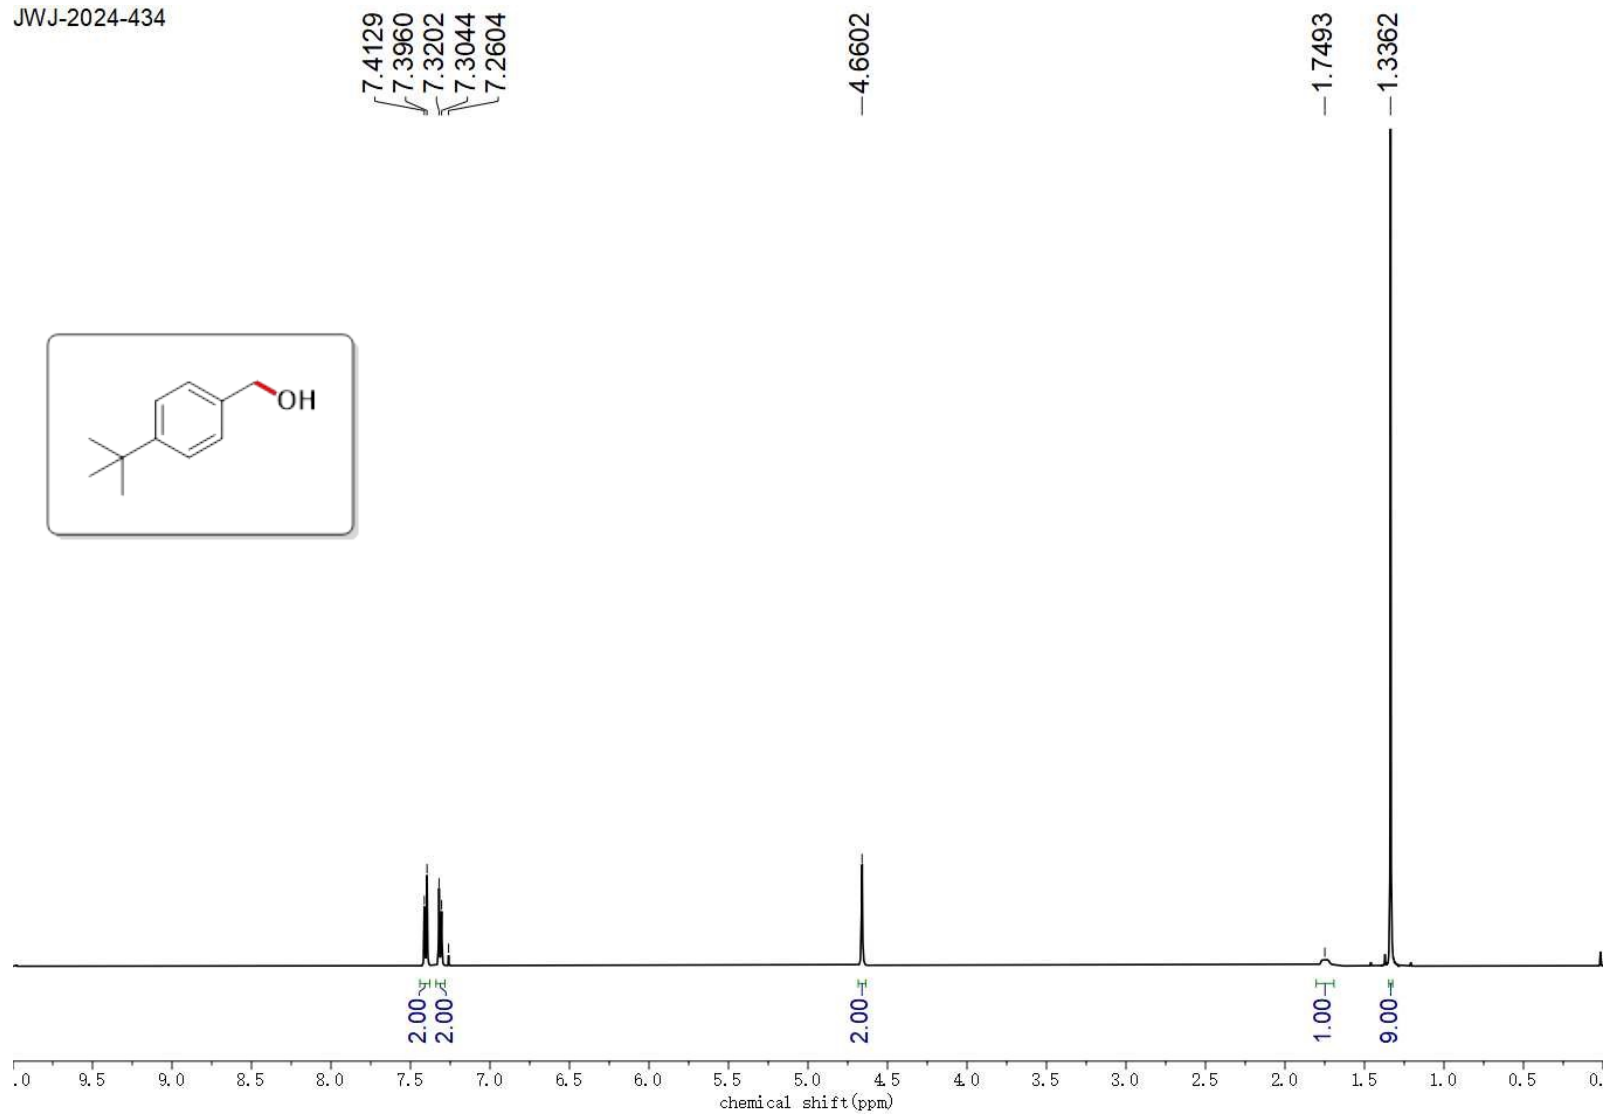



JWJ-2024-434

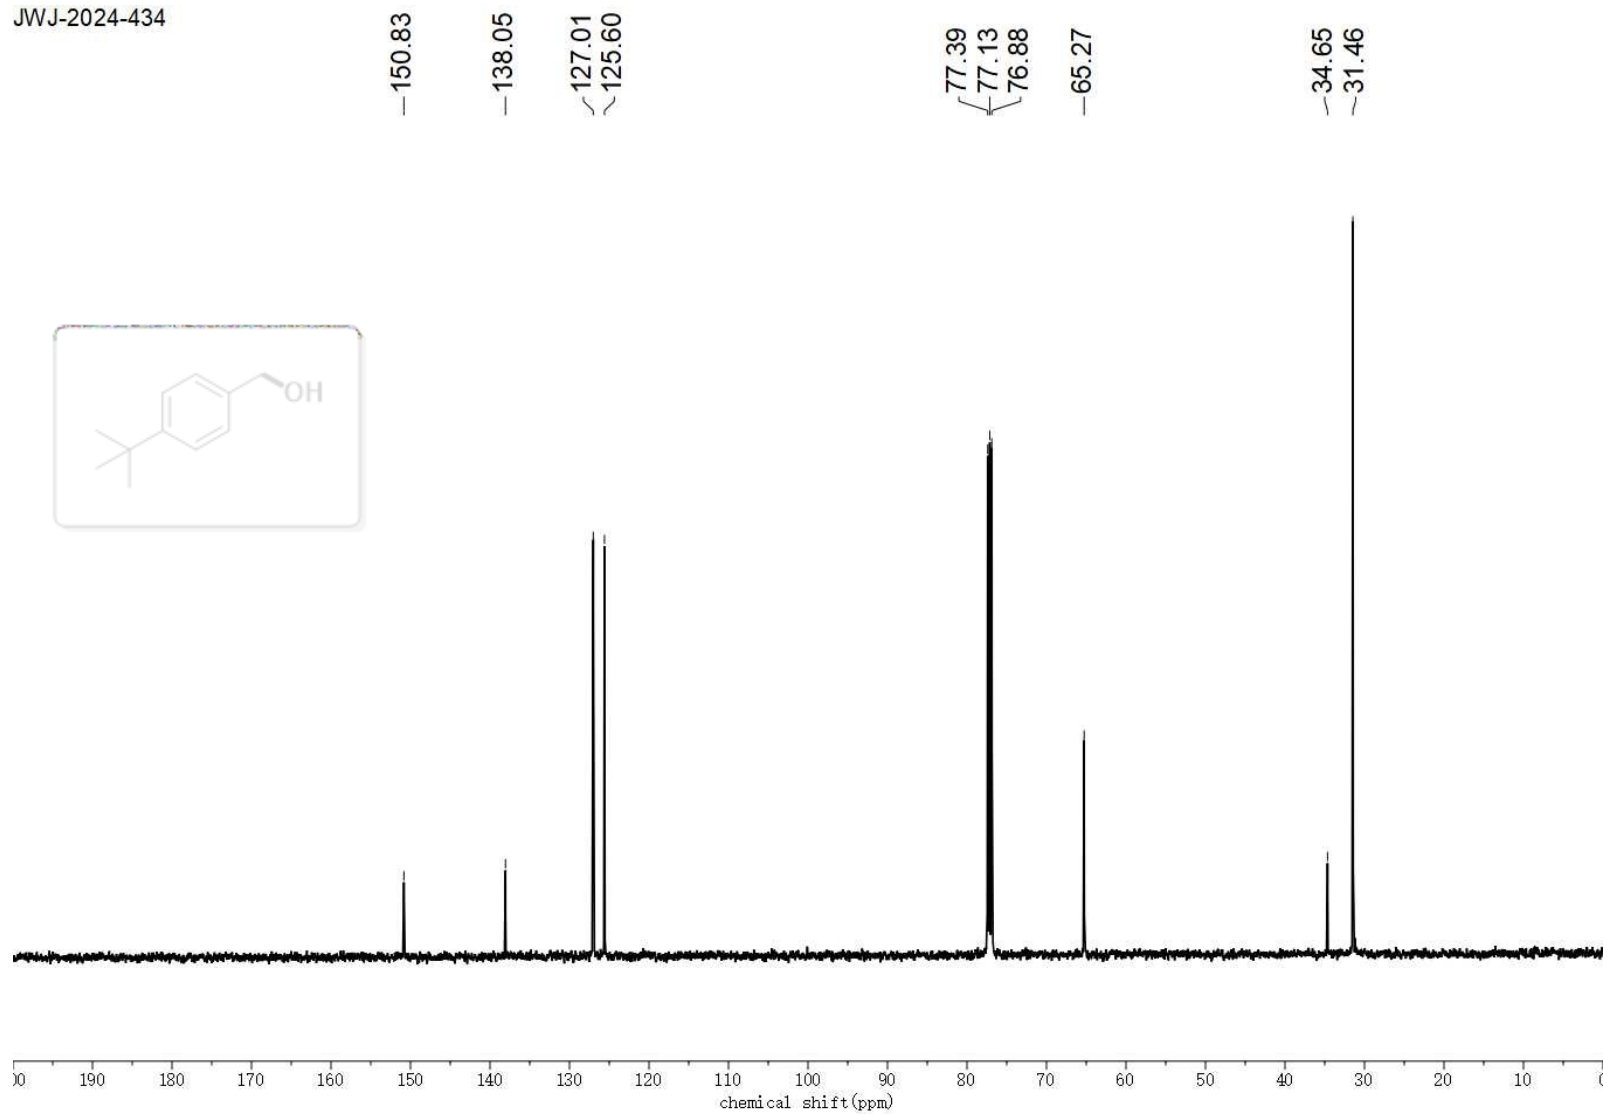

JWJ-2024-311

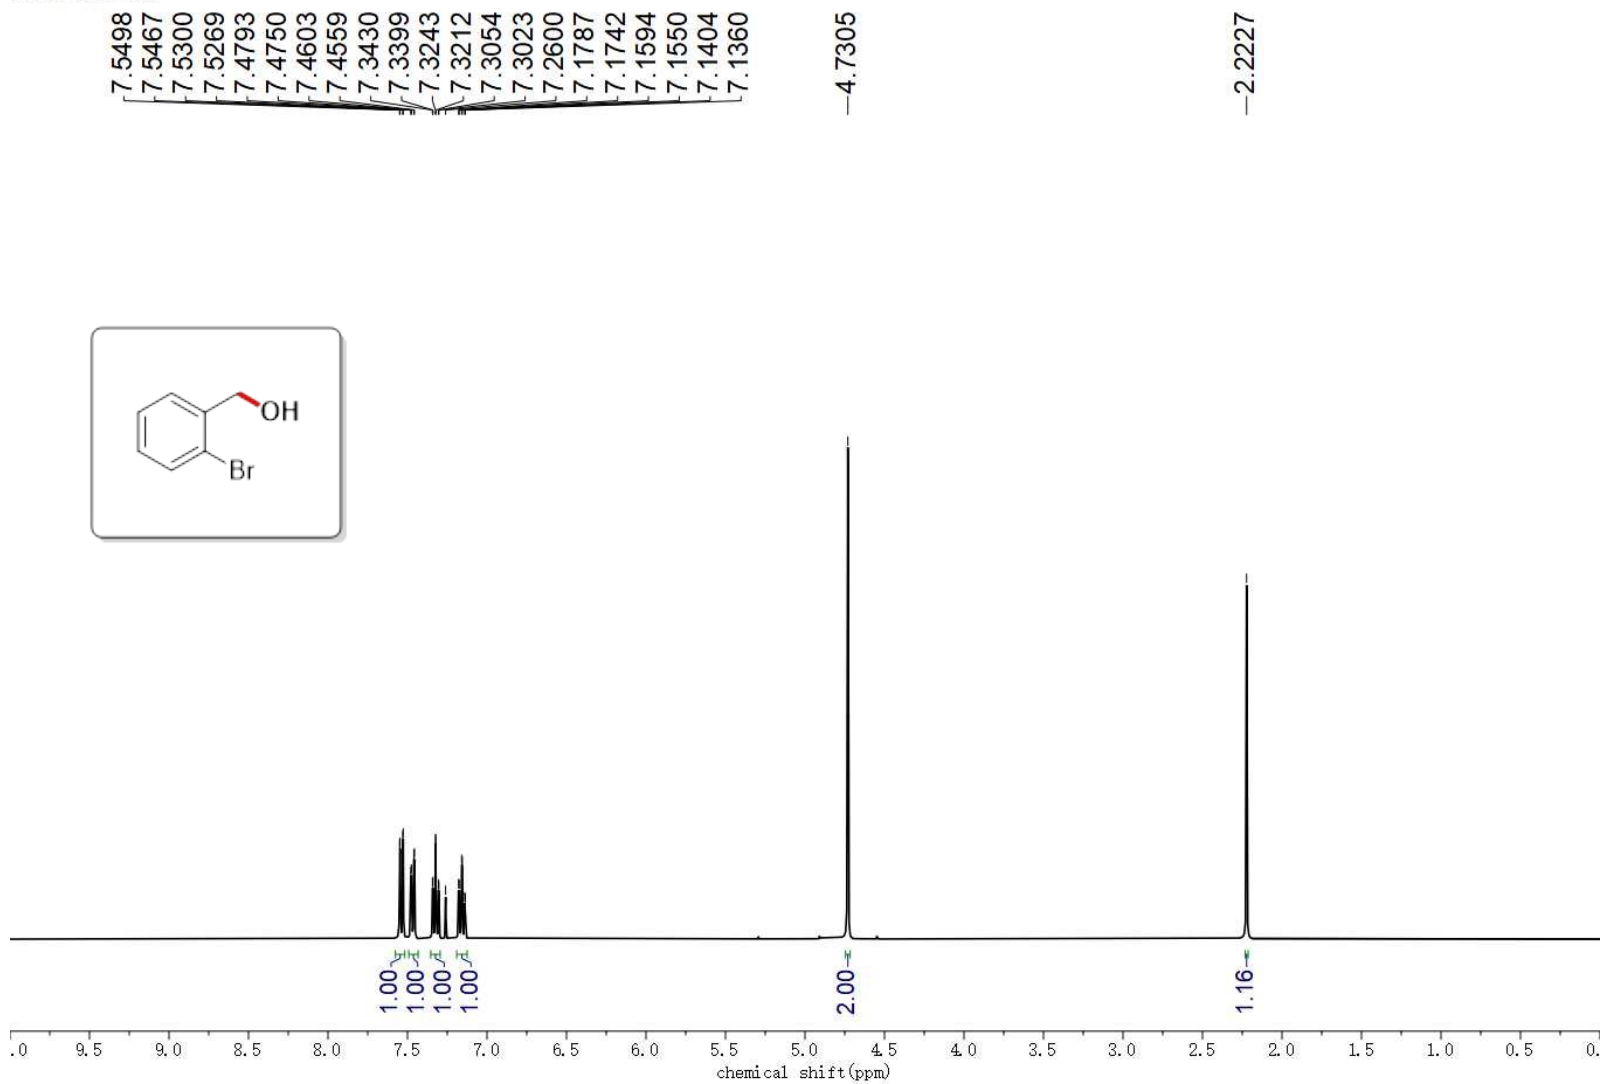

JWJ-2024-311

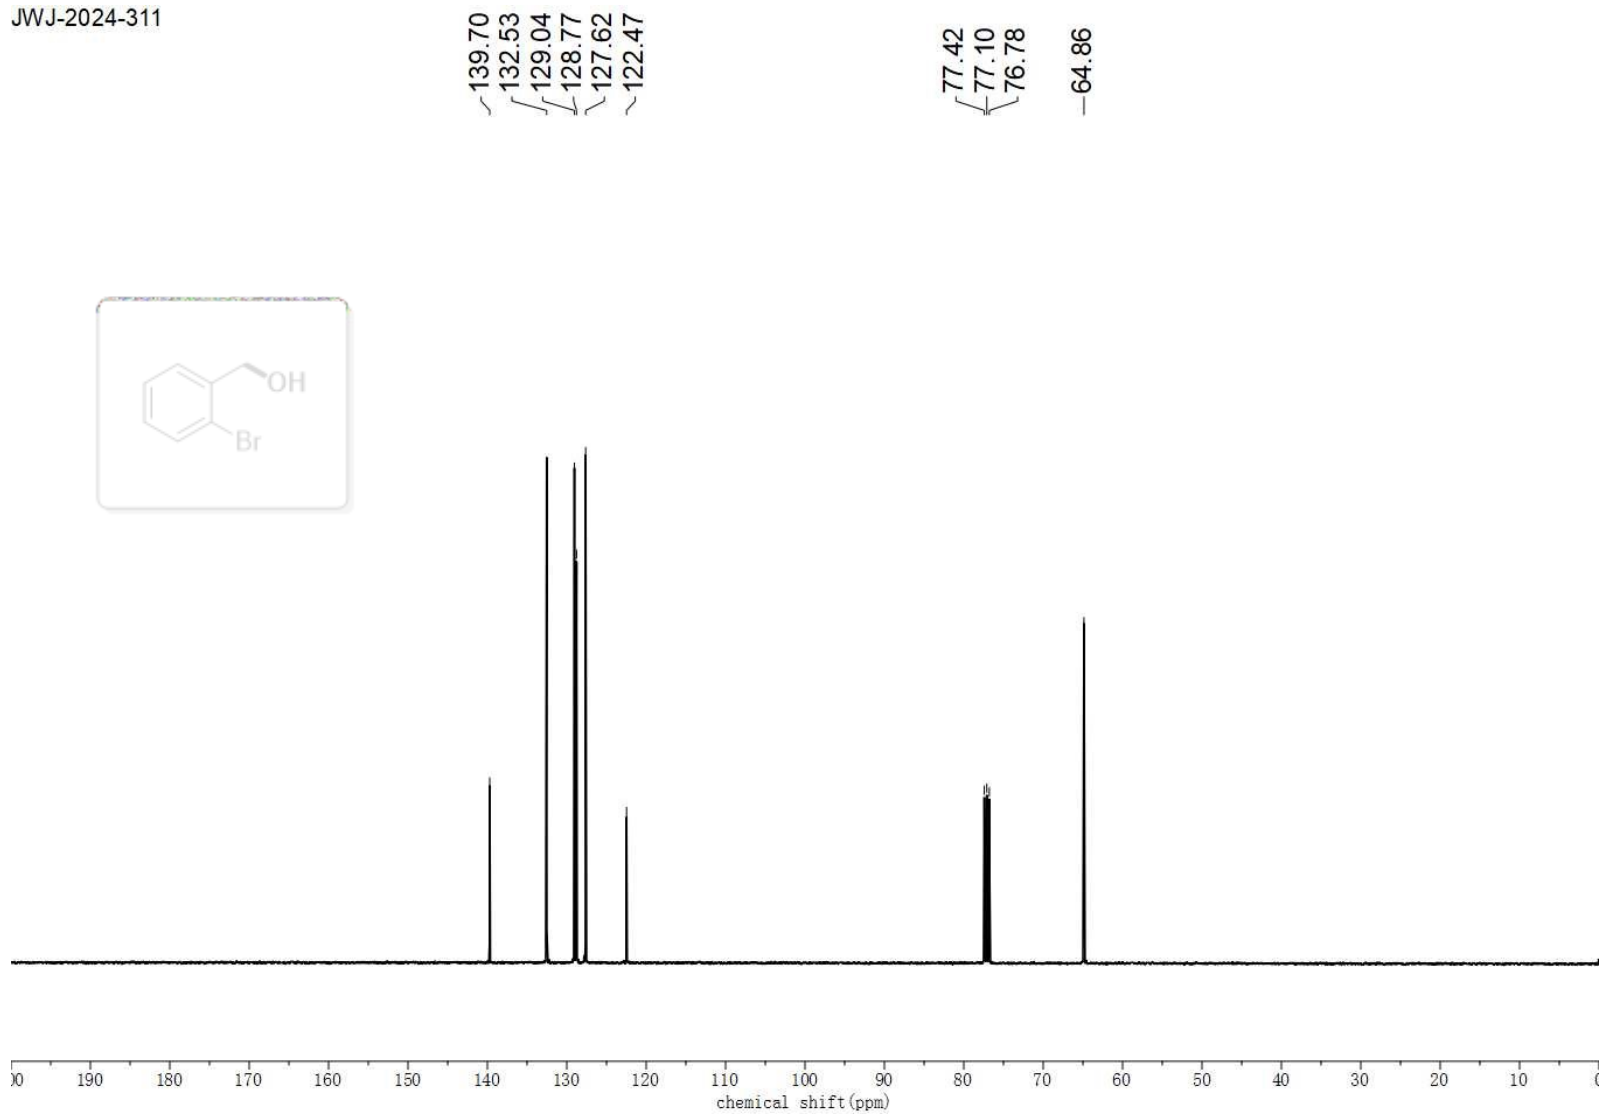

JWJ-2024-260

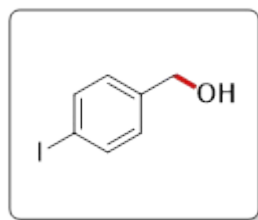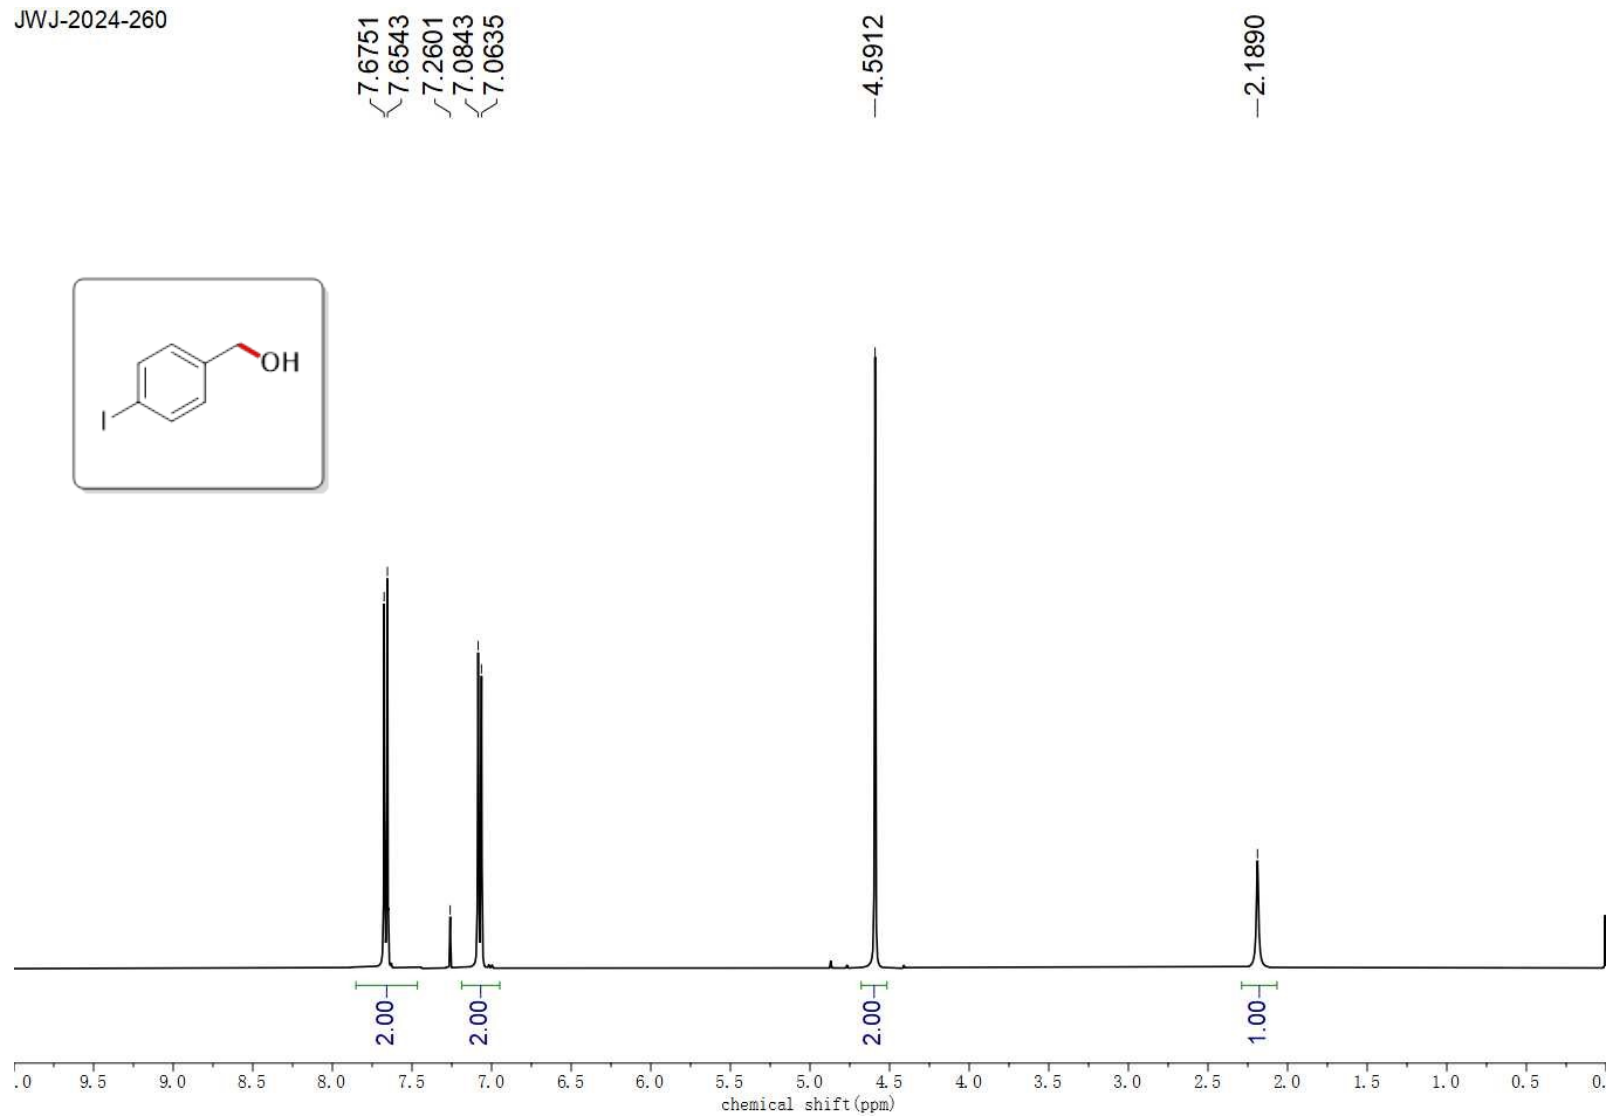

JWJ-2024-260

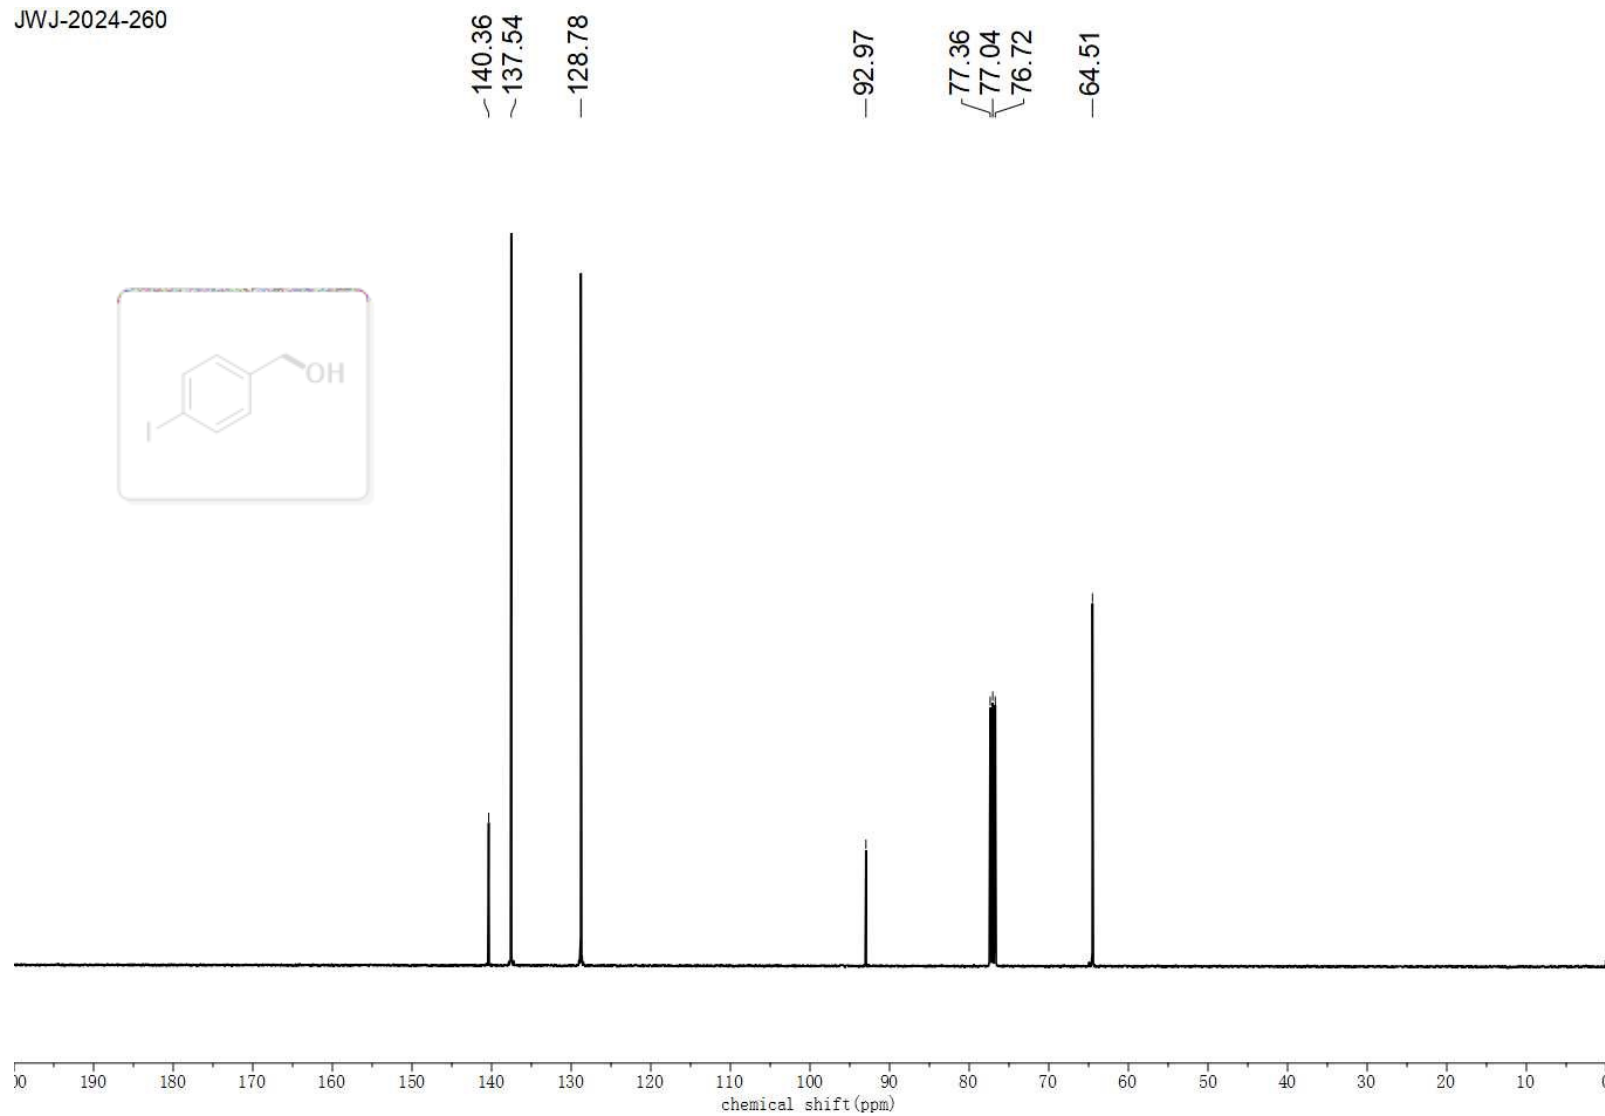

JWJ-2024-261

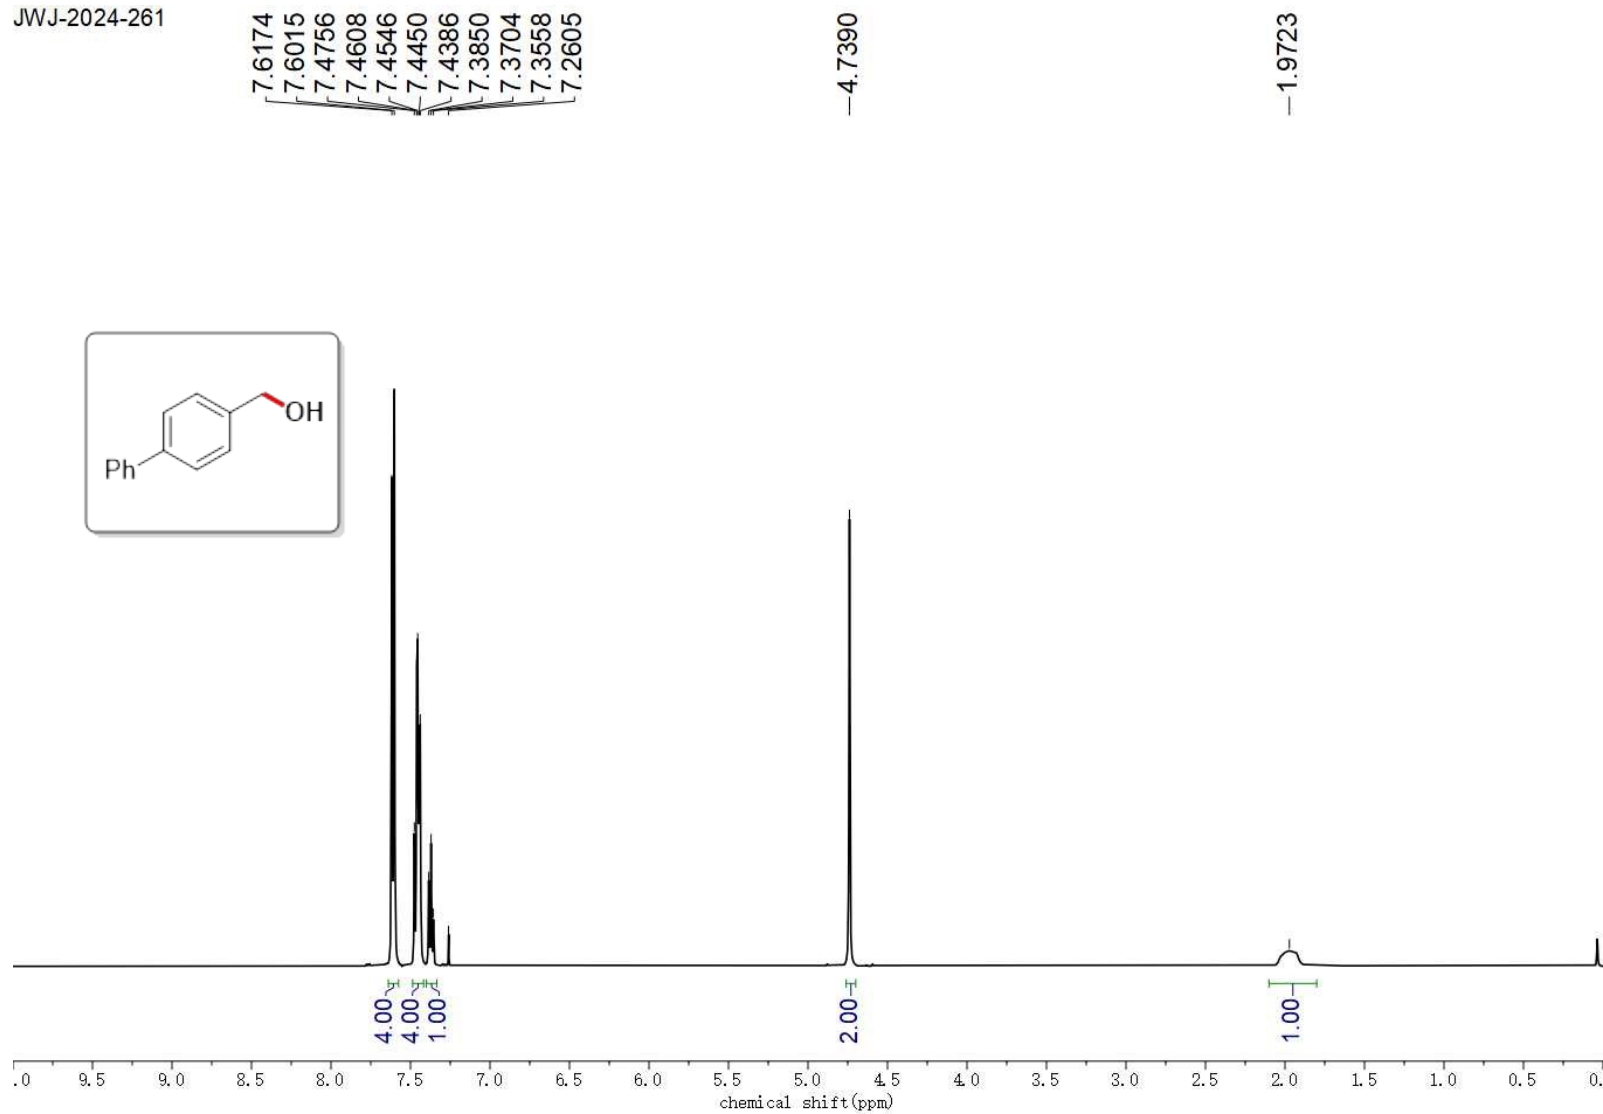

JWJ-2024-261

140.92  
140.71  
139.99  
128.88  
127.55  
127.40  
127.18

77.39  
77.13  
76.88  
-65.14

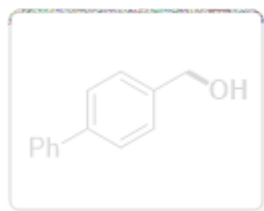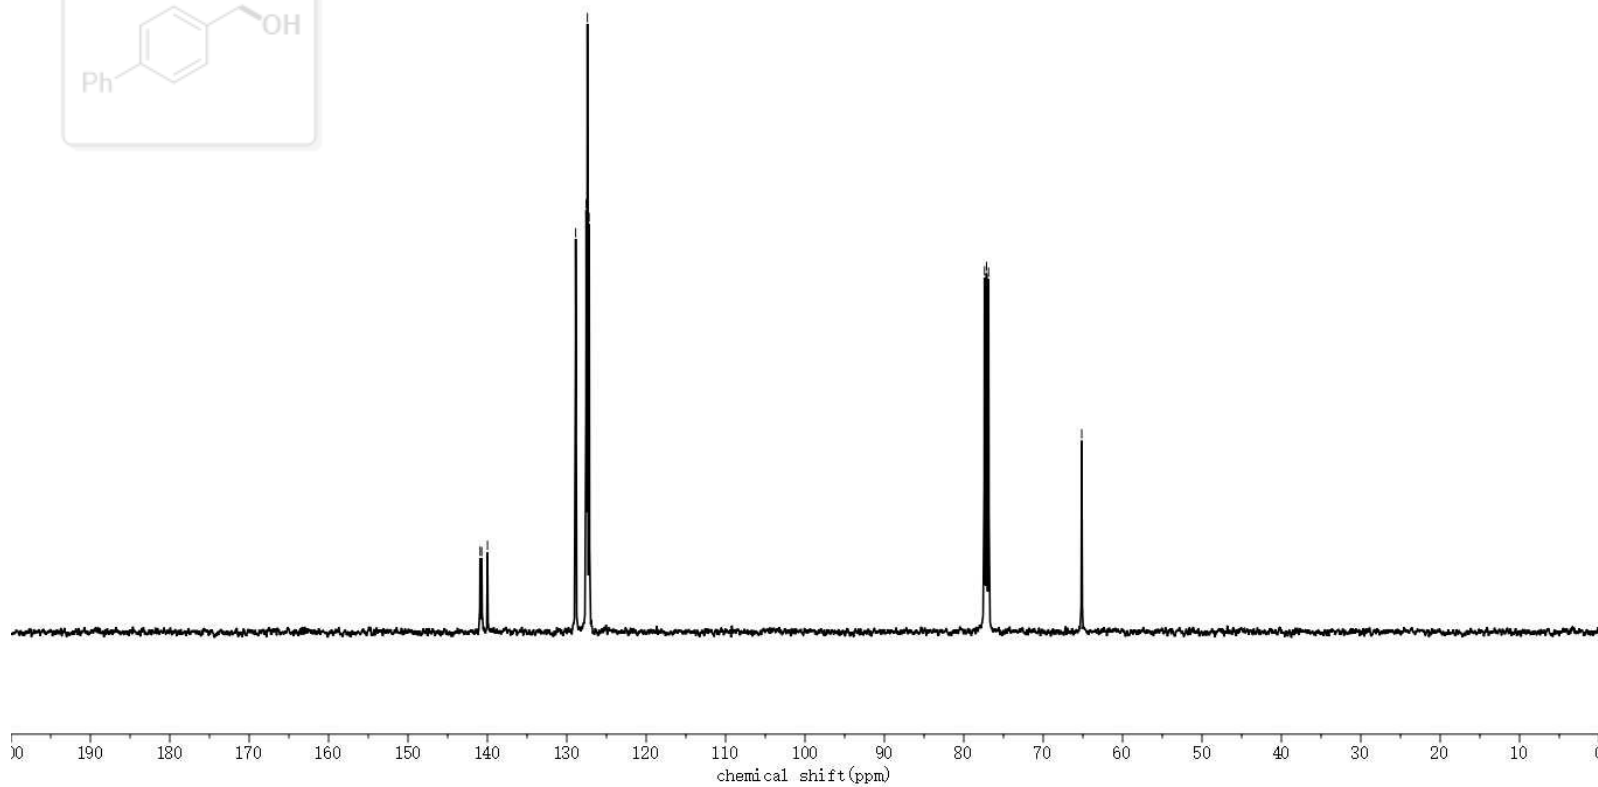

JWJ-2024-414

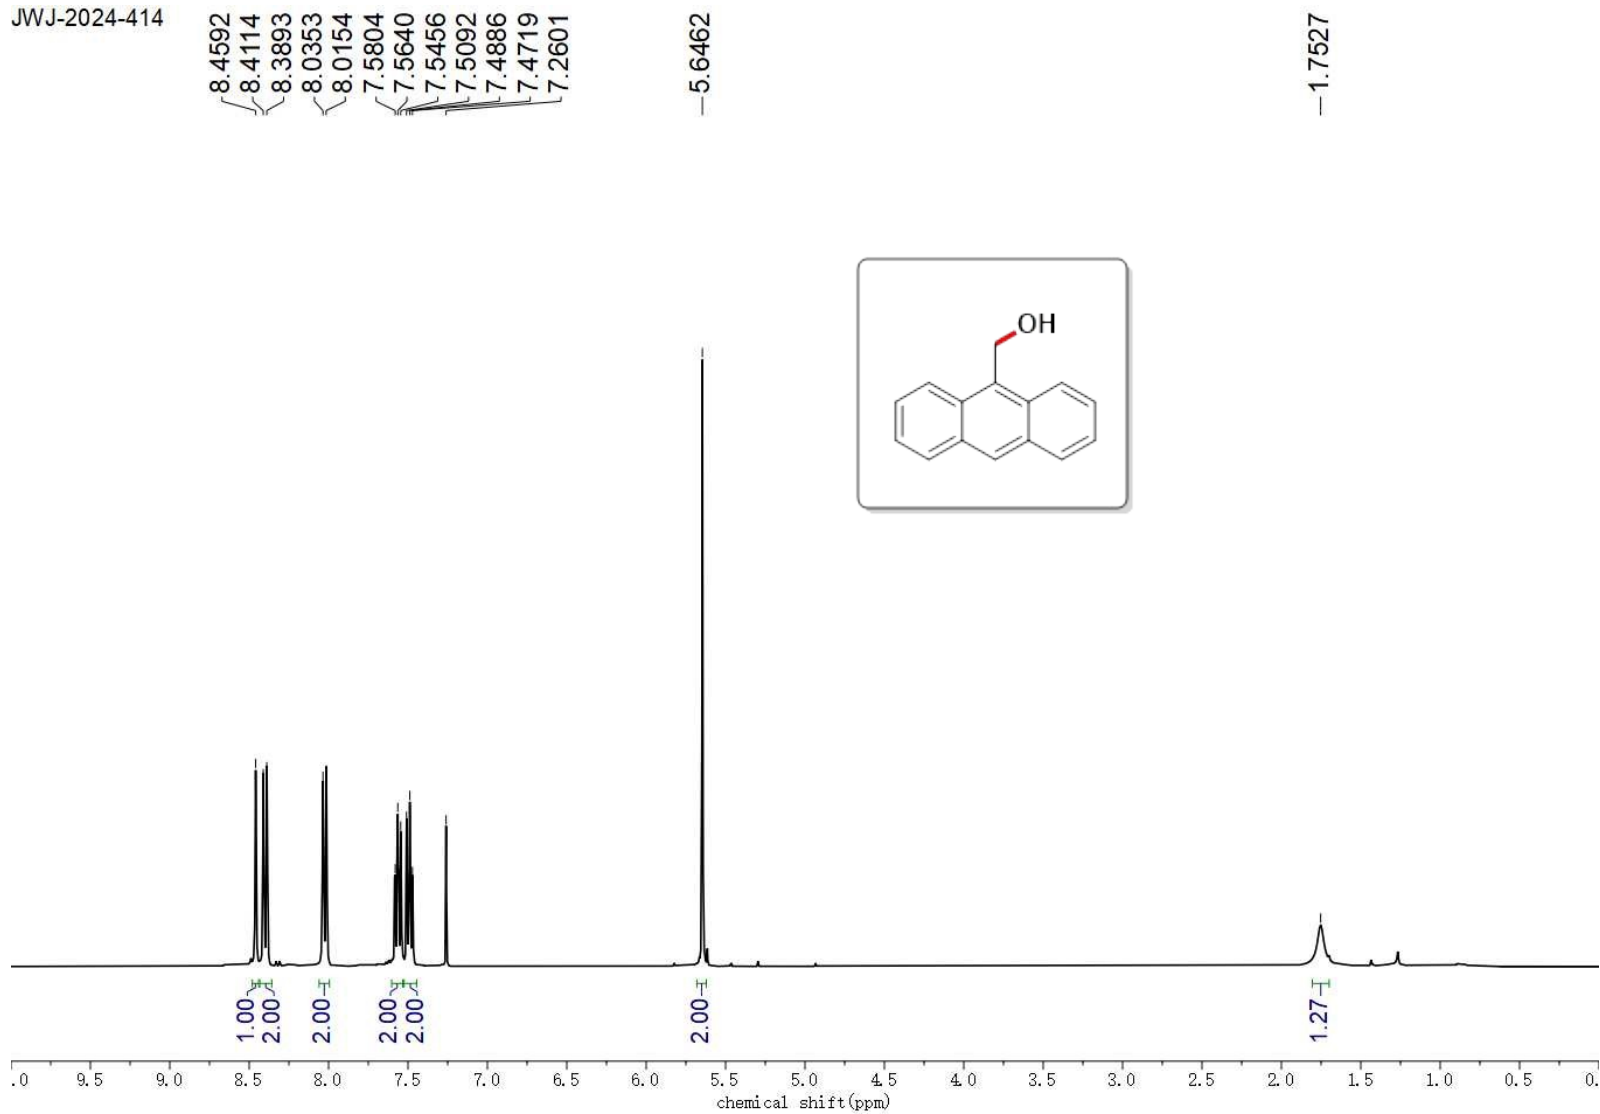



JWJ-2024-414

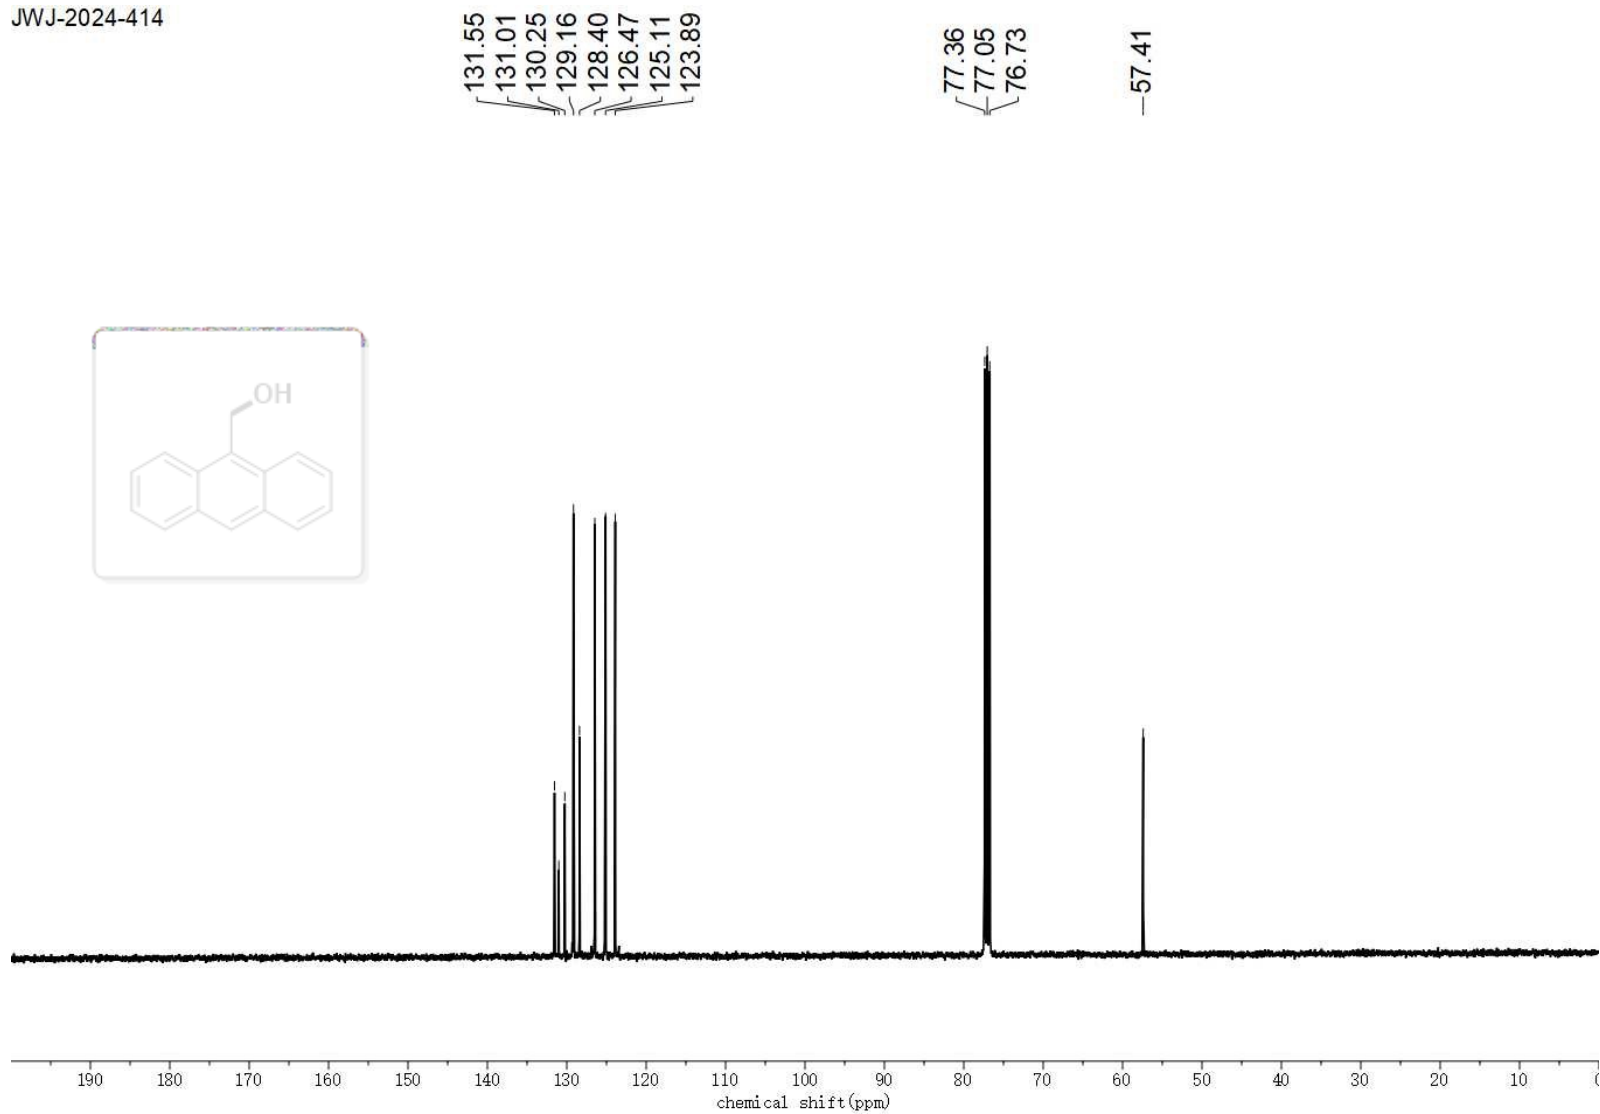

JWJ-2024-248

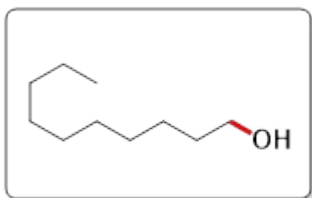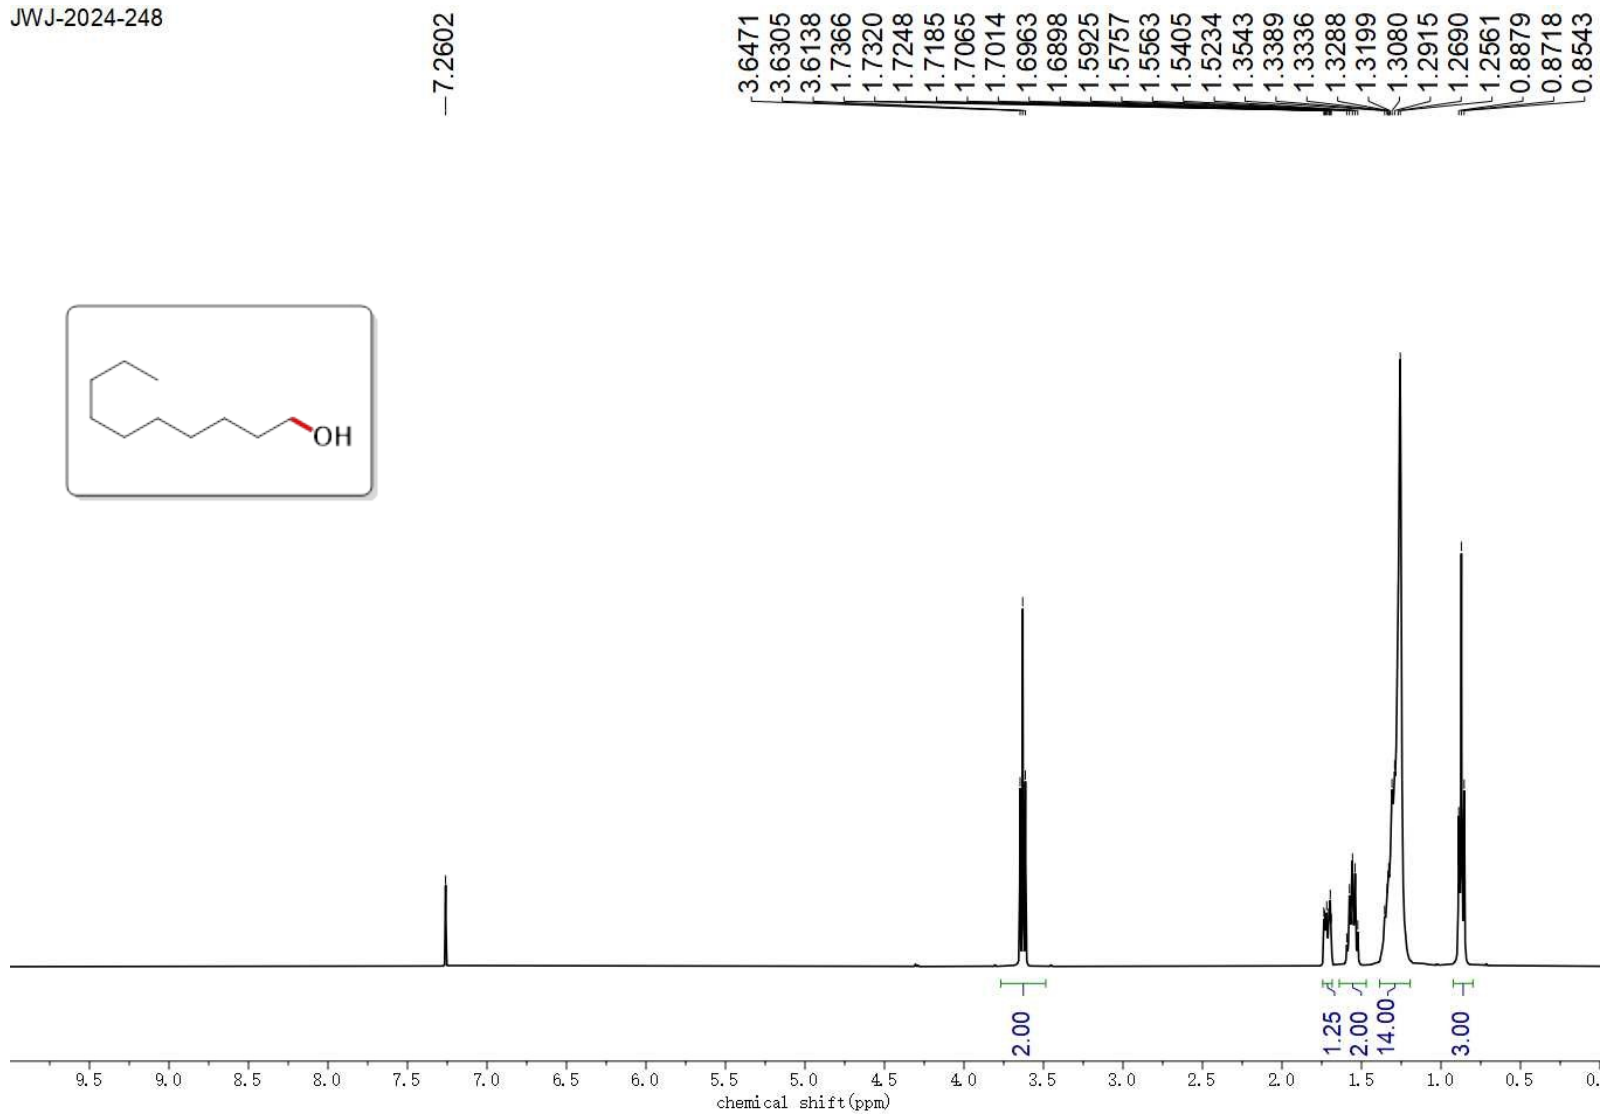

JWJ-2024-248

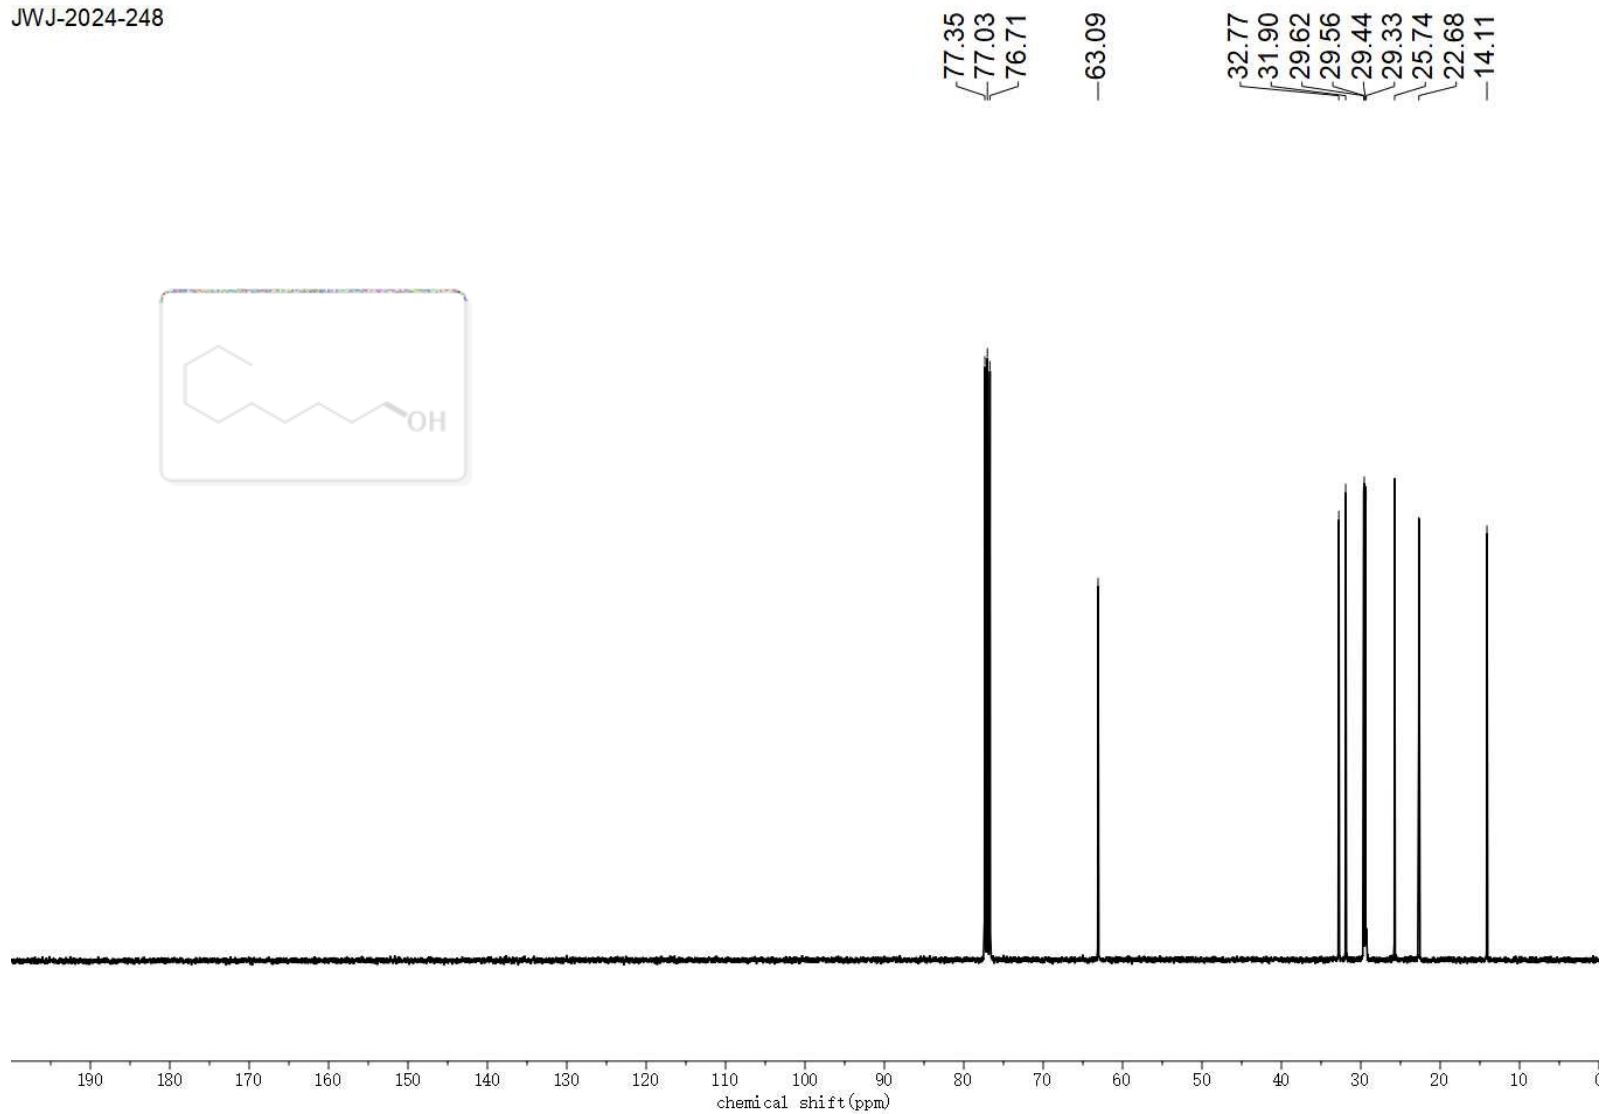

JWJ-2024-431

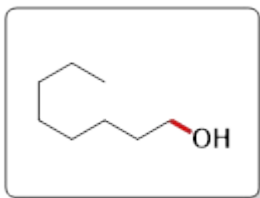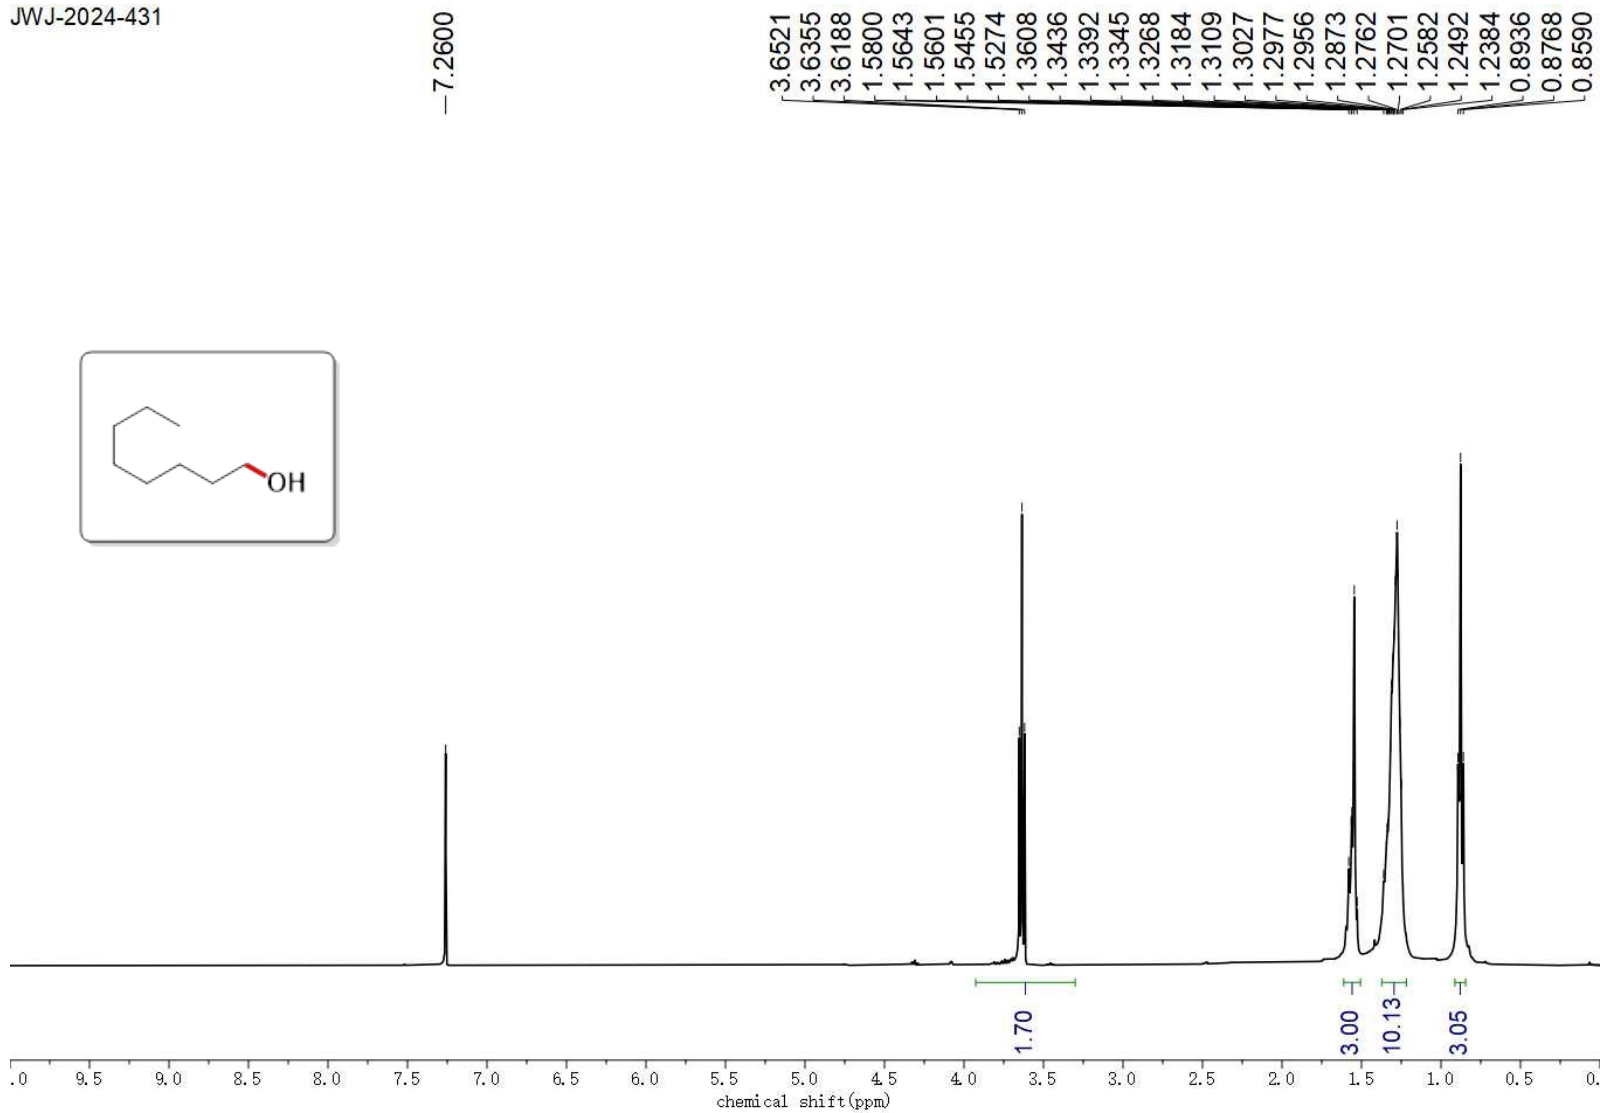

JWJ-2024-431

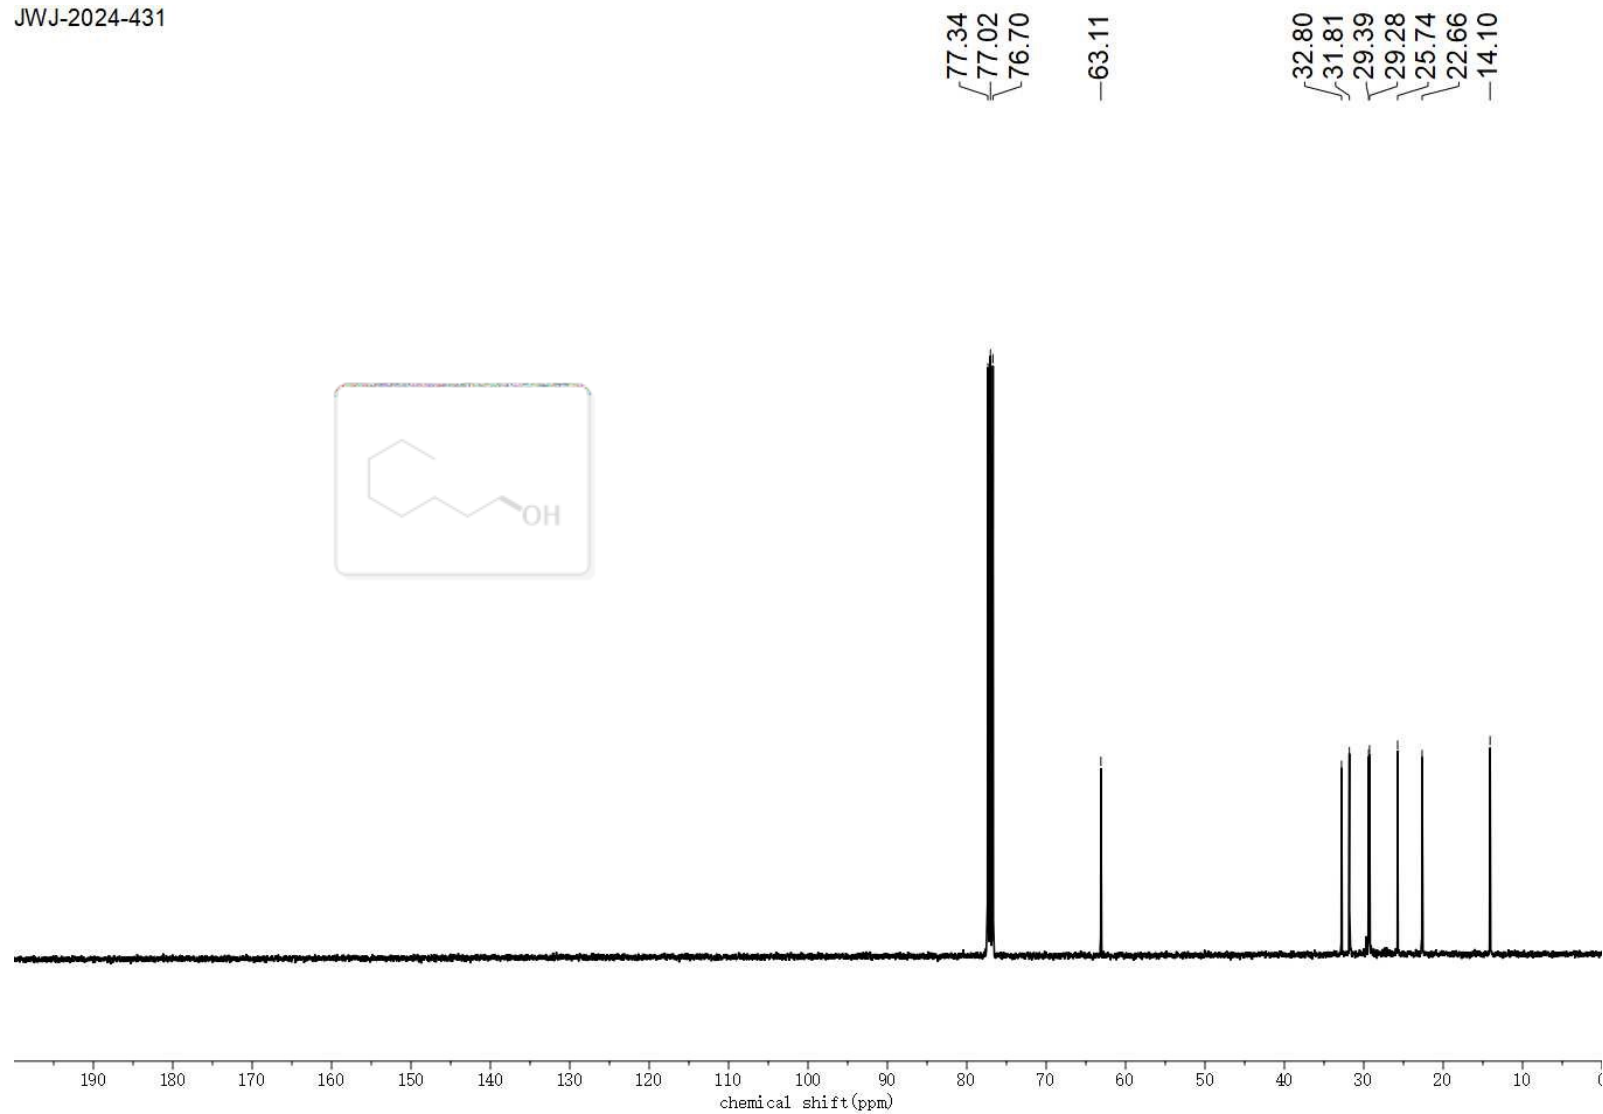

JWJ-2024-249

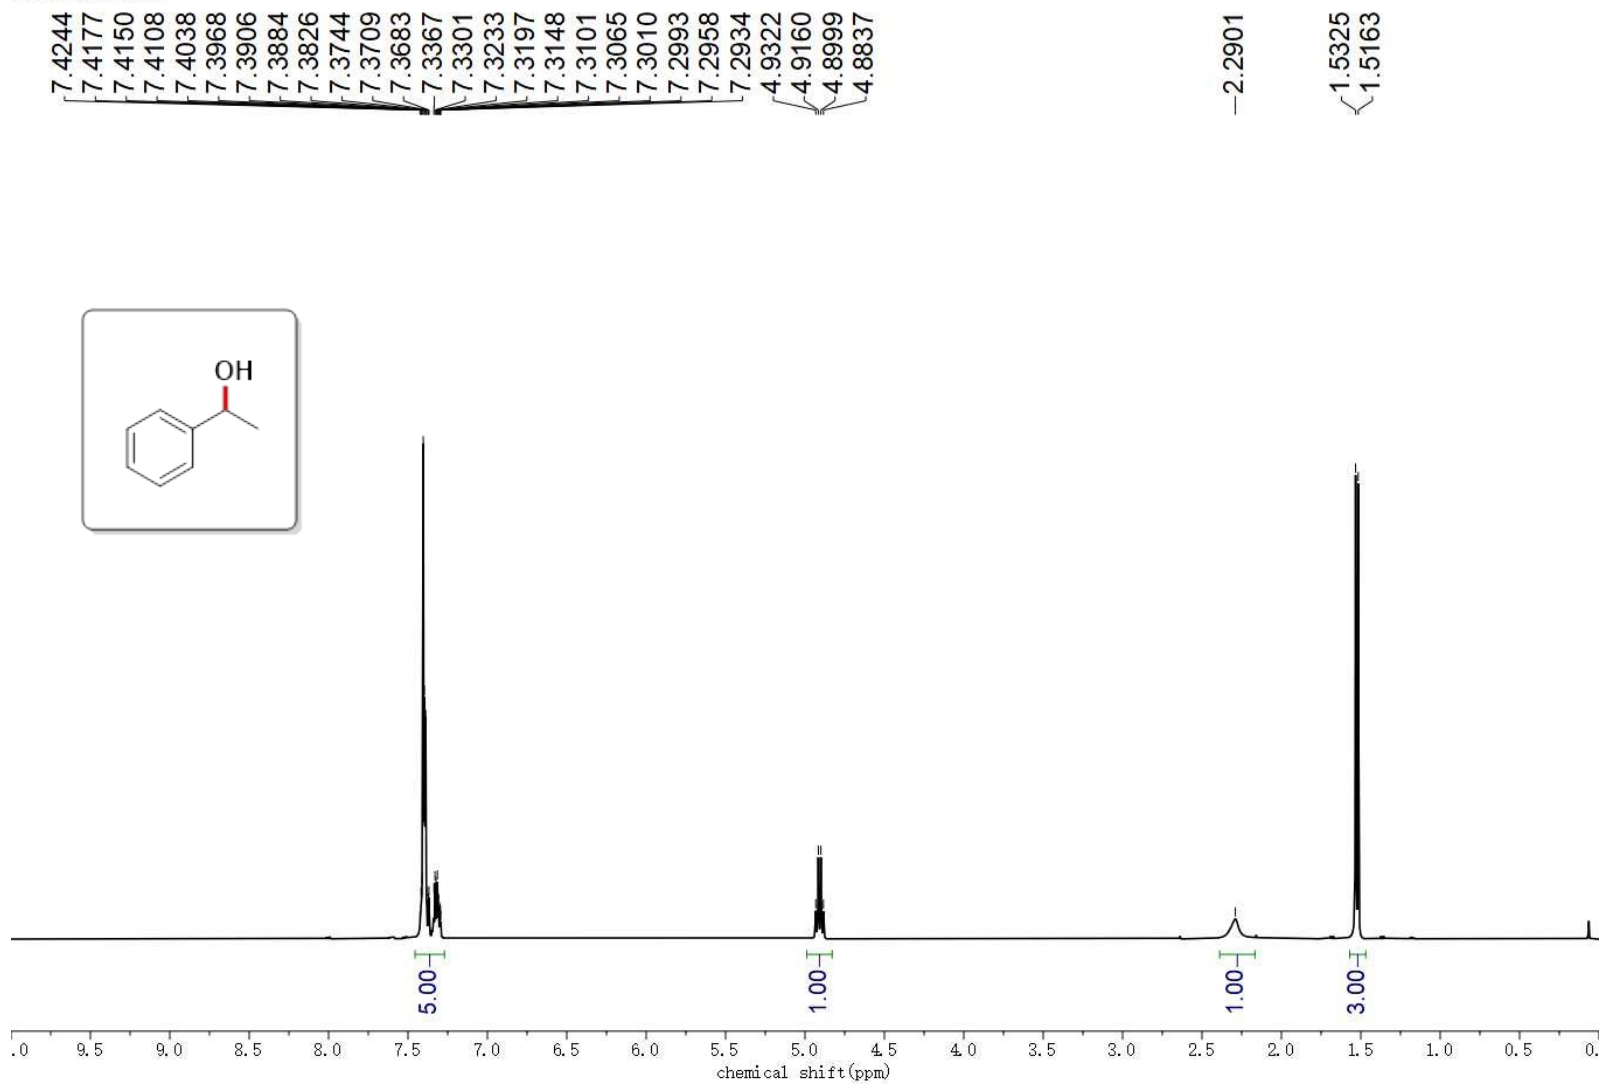

JWJ-2024-249

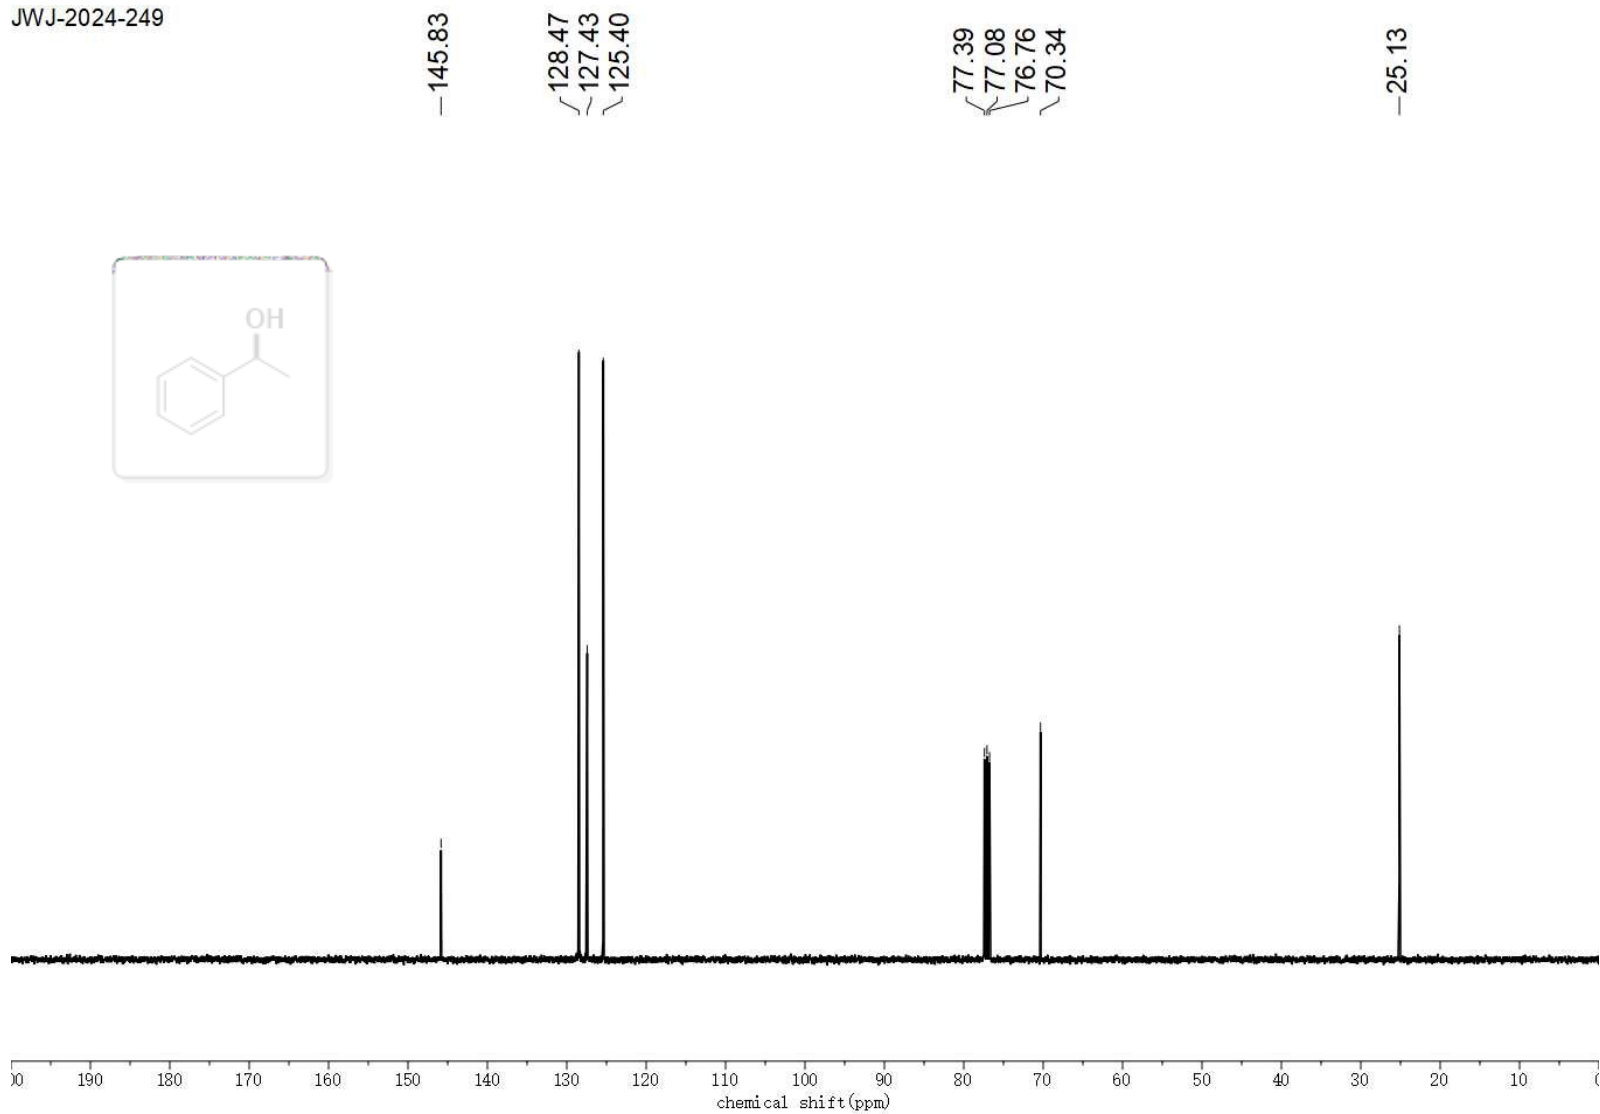

JWJ-2024-238

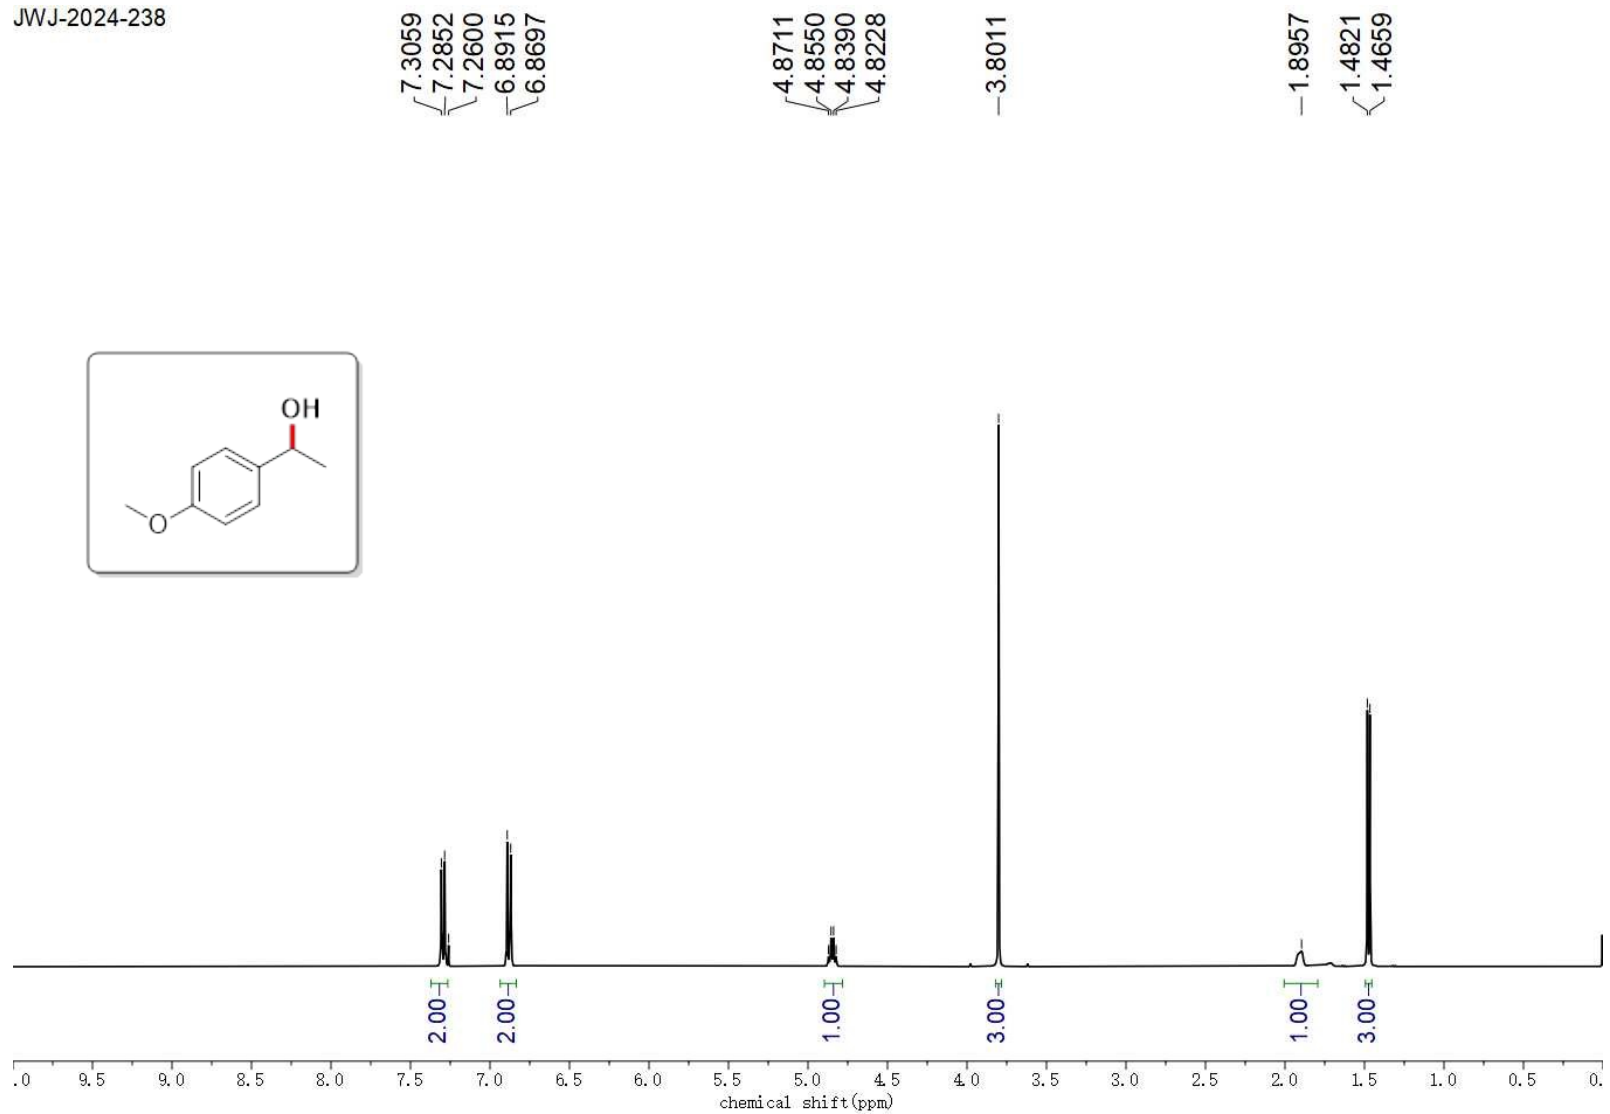



JWJ-2024-238

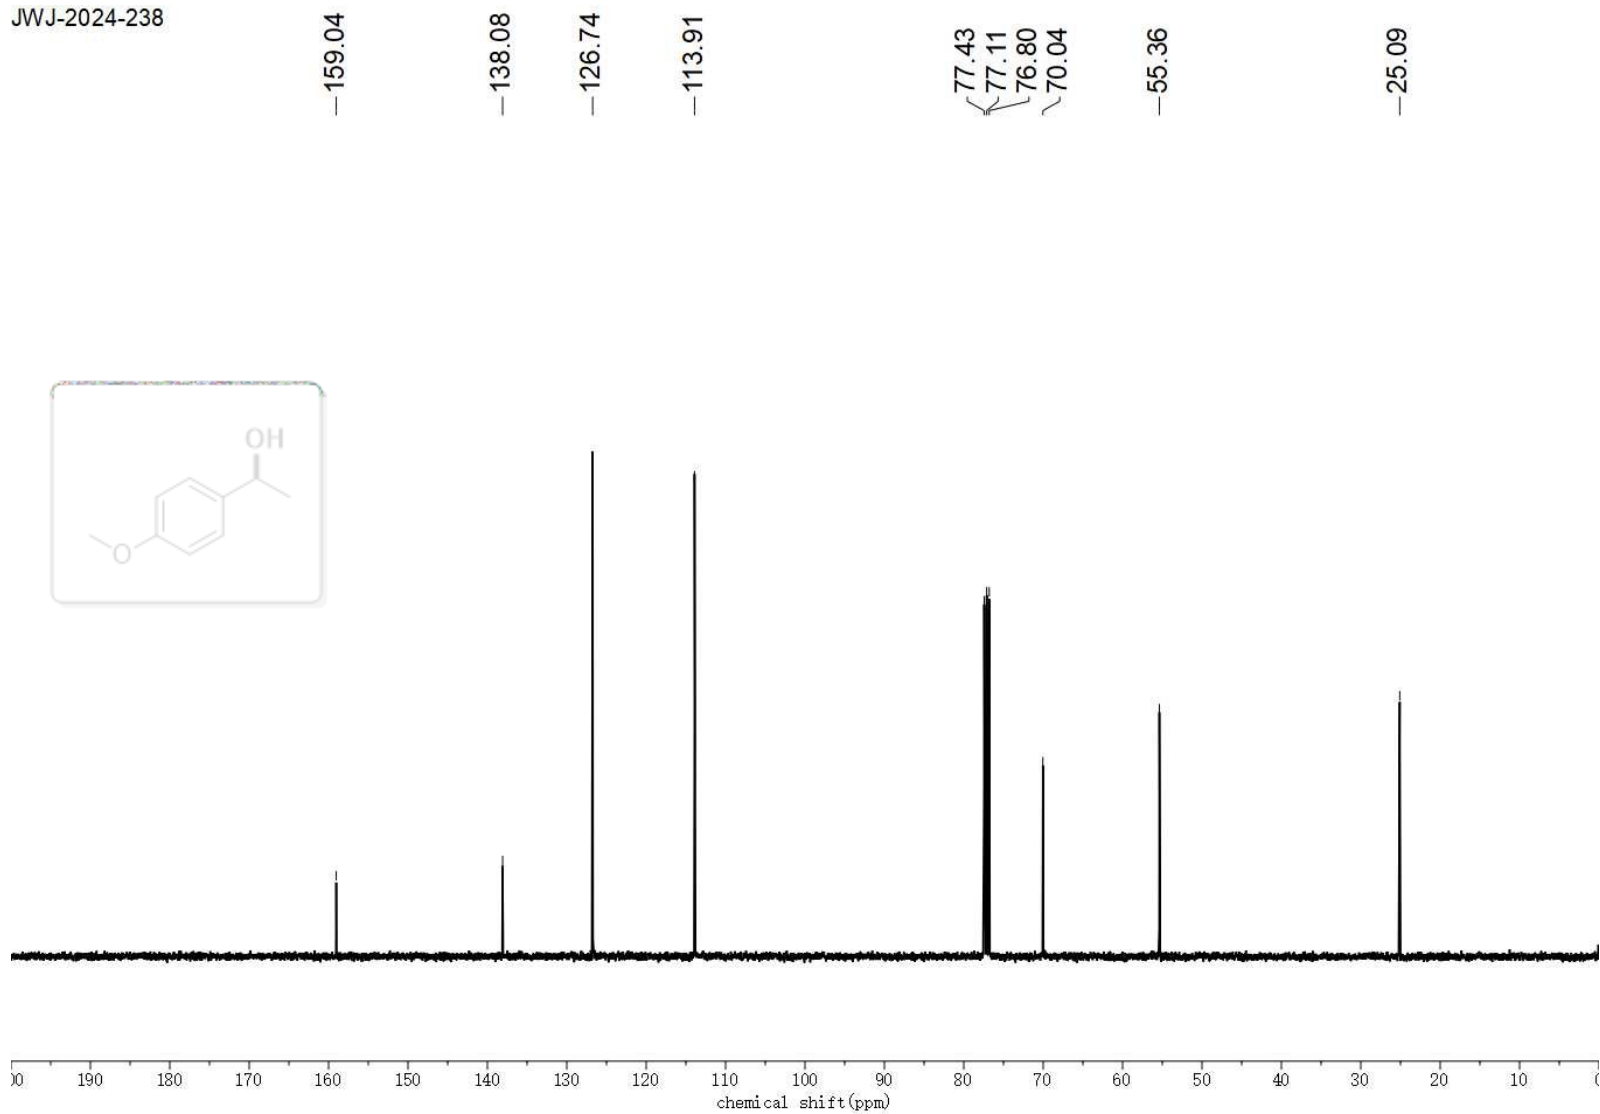

JWJ-2024-235

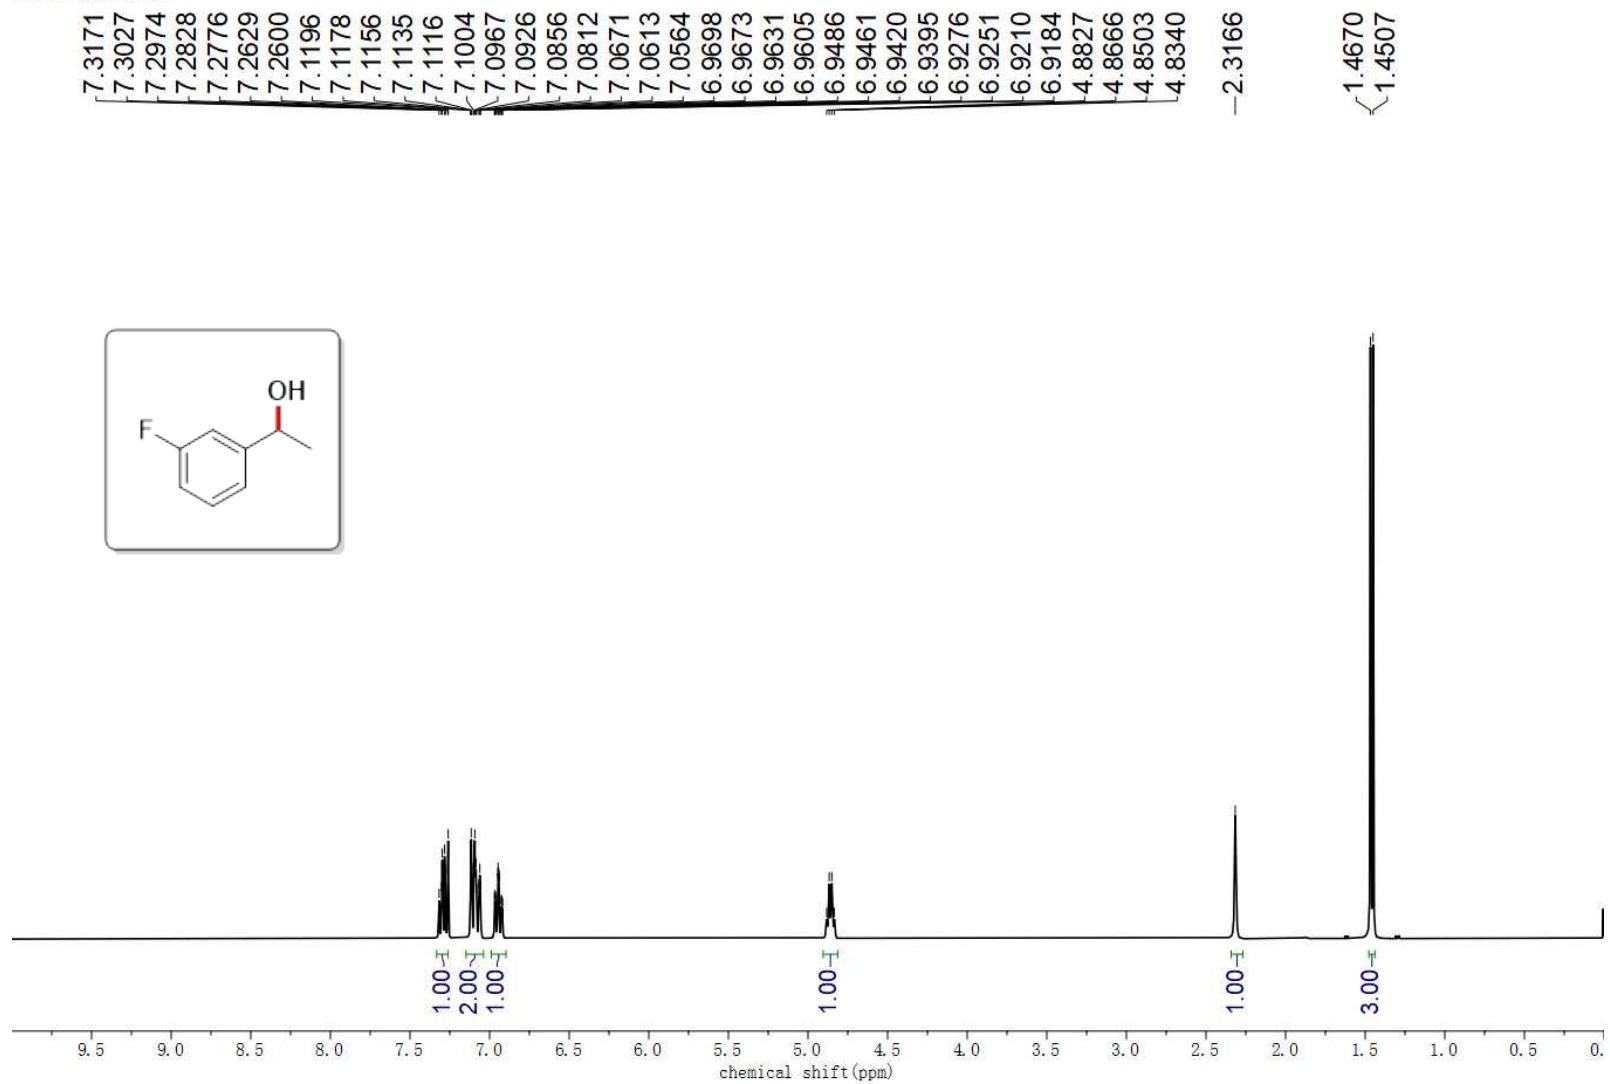

JWJ-2024-235

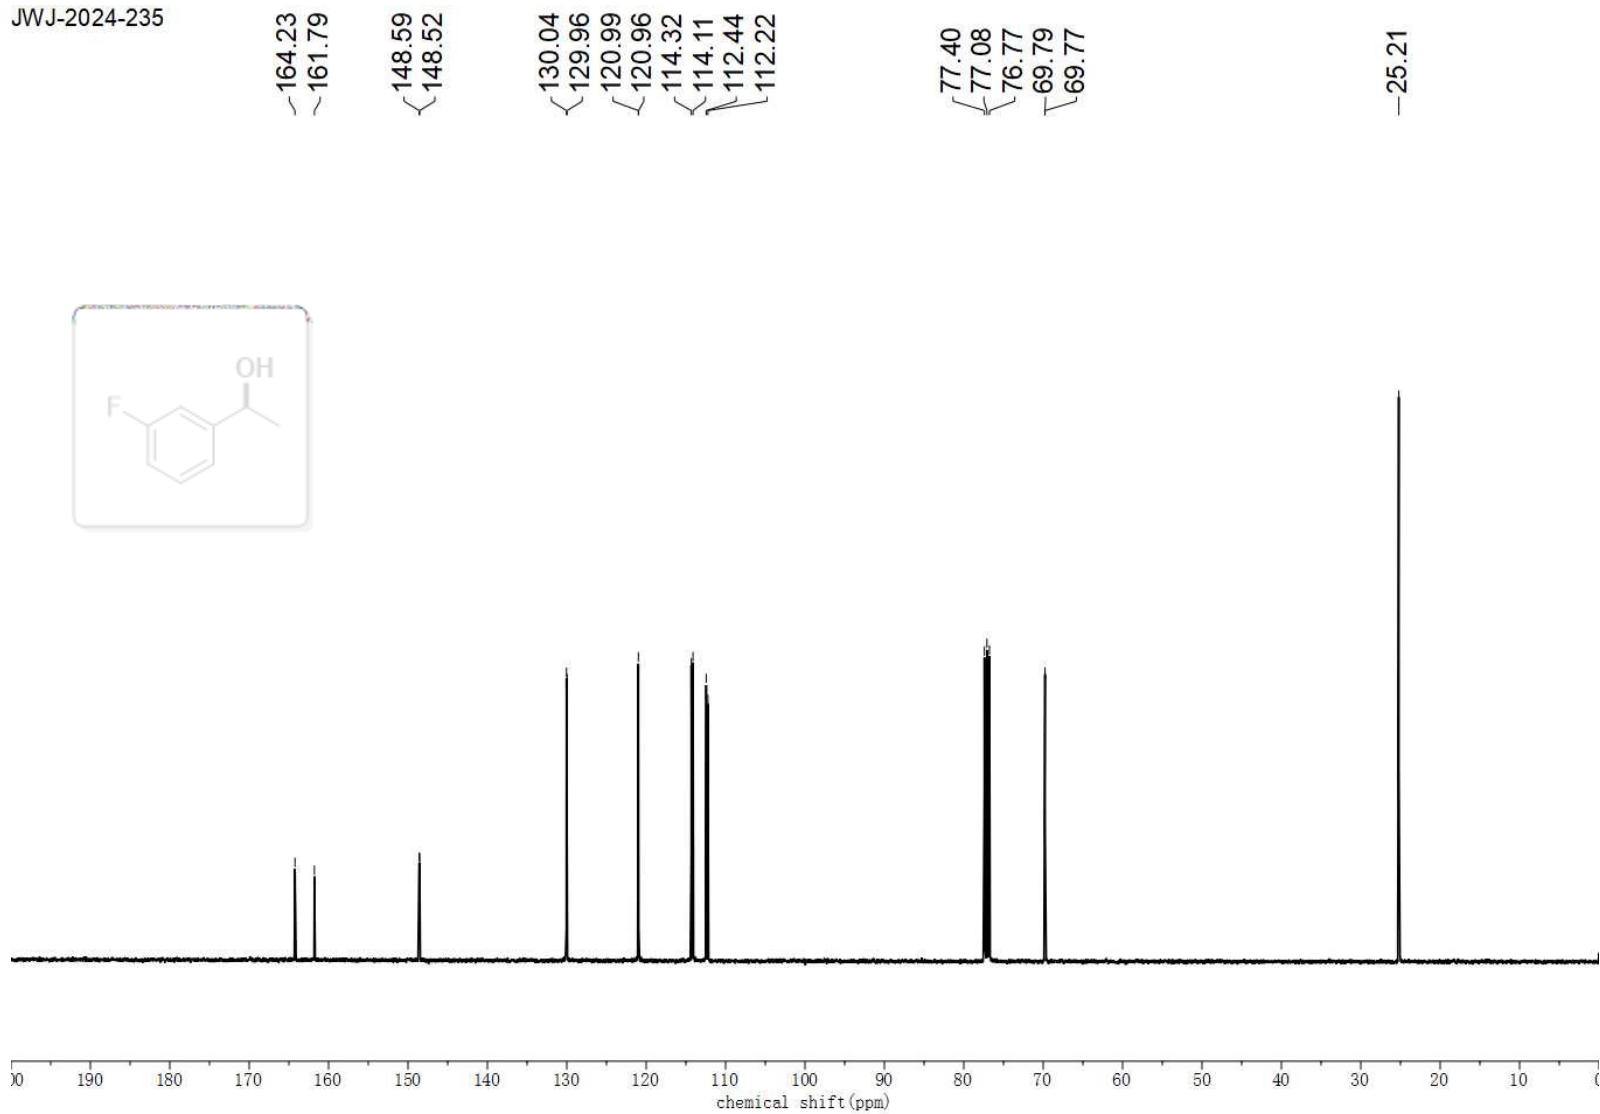

JWJ-2024-235

112.91

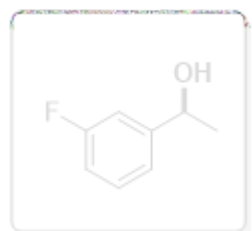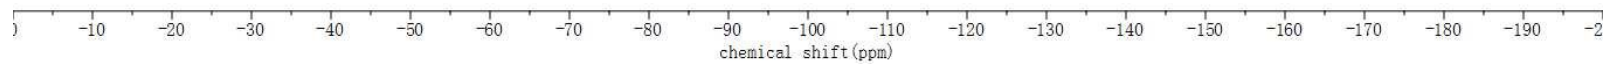

JWJ-2024-234

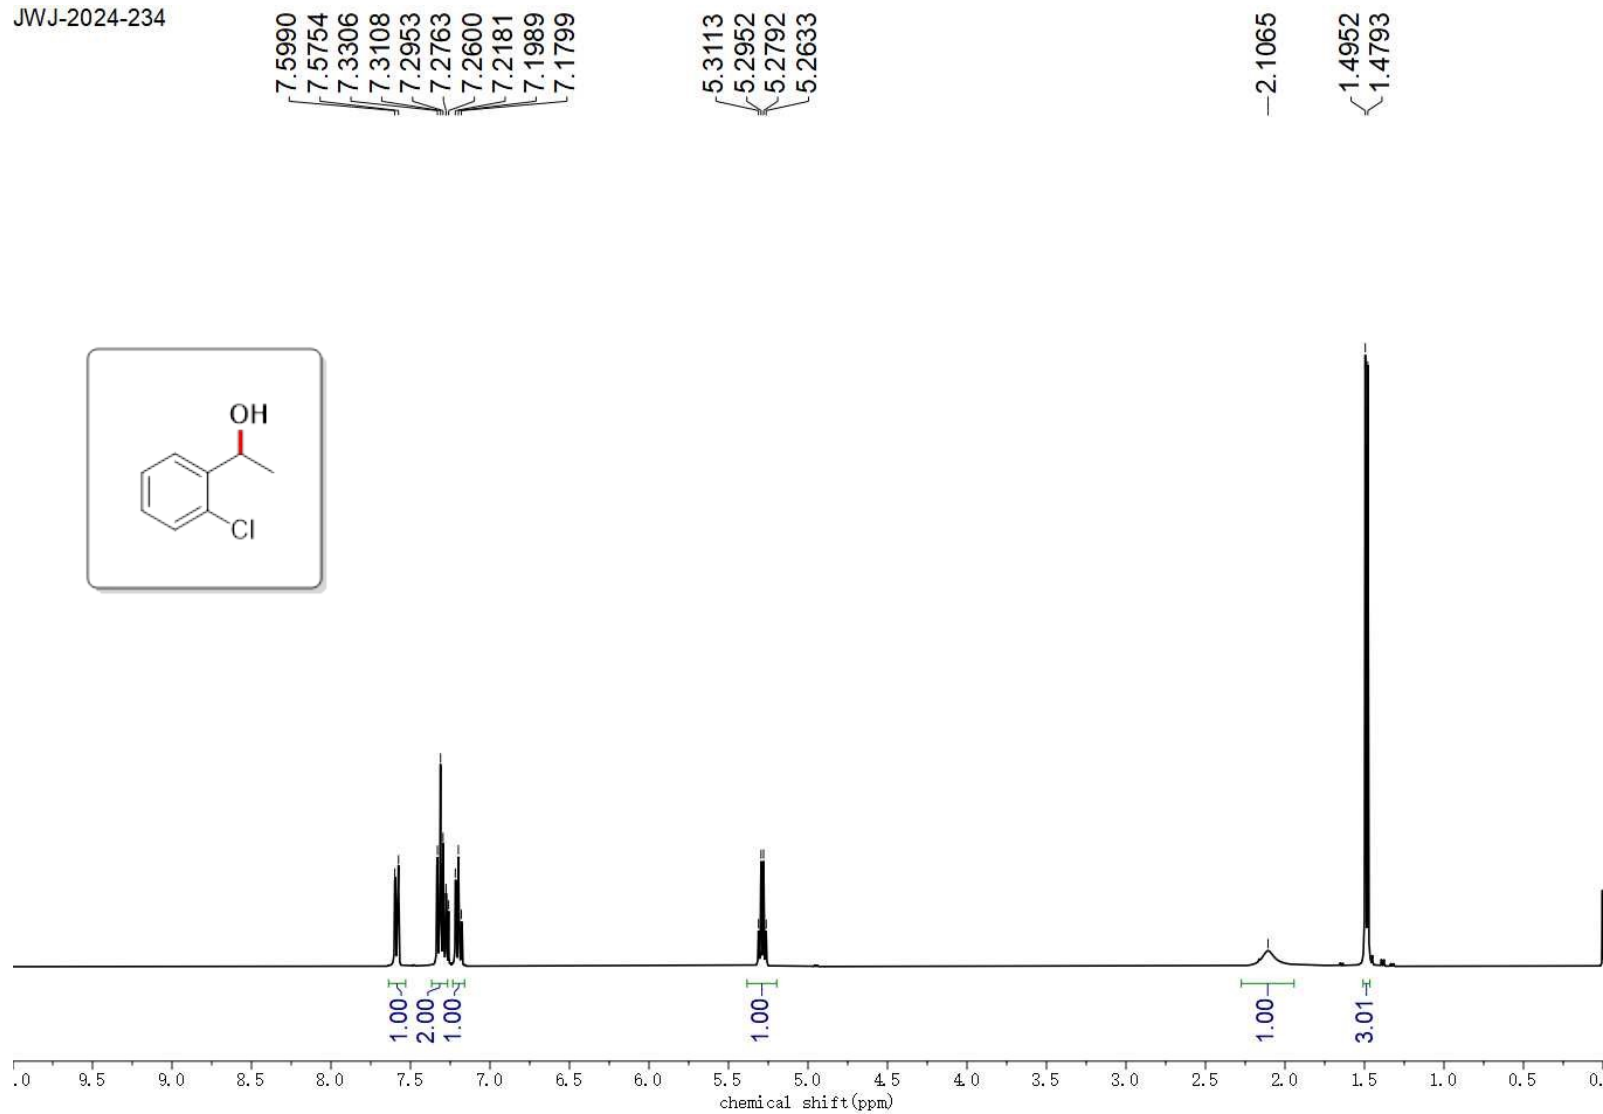

JWJ-2024-234

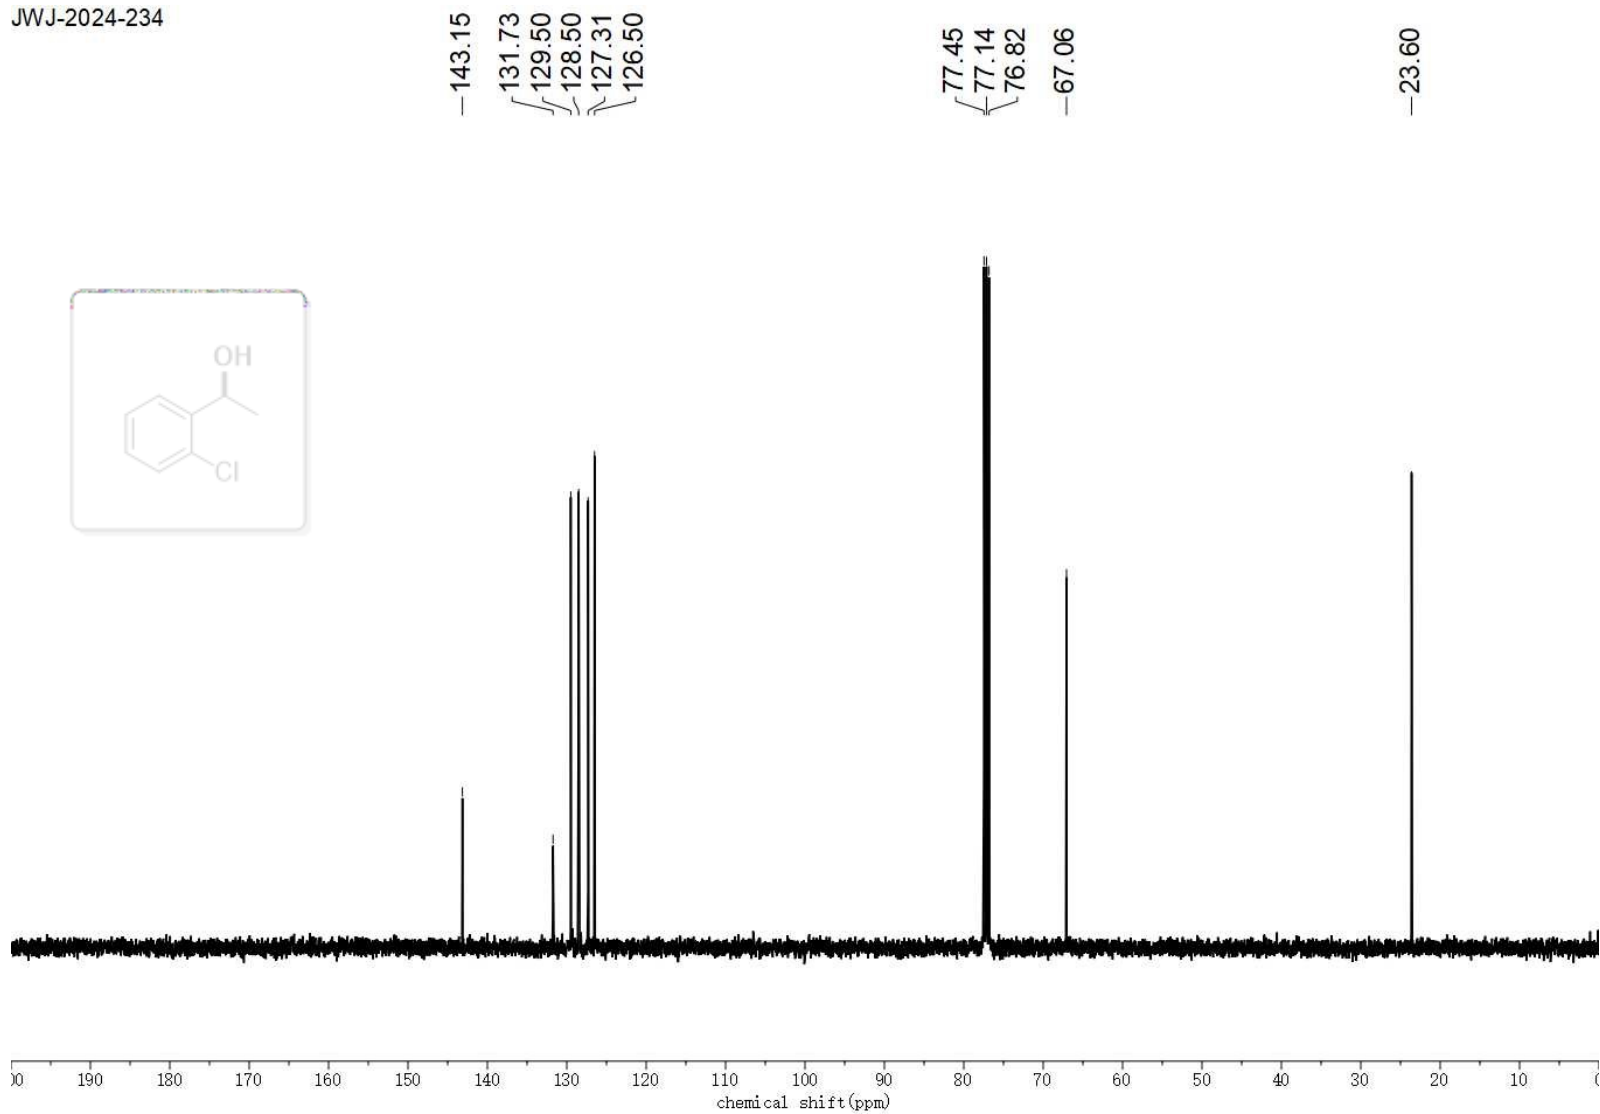

JWJ-2024-250

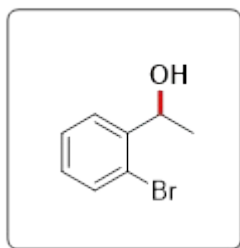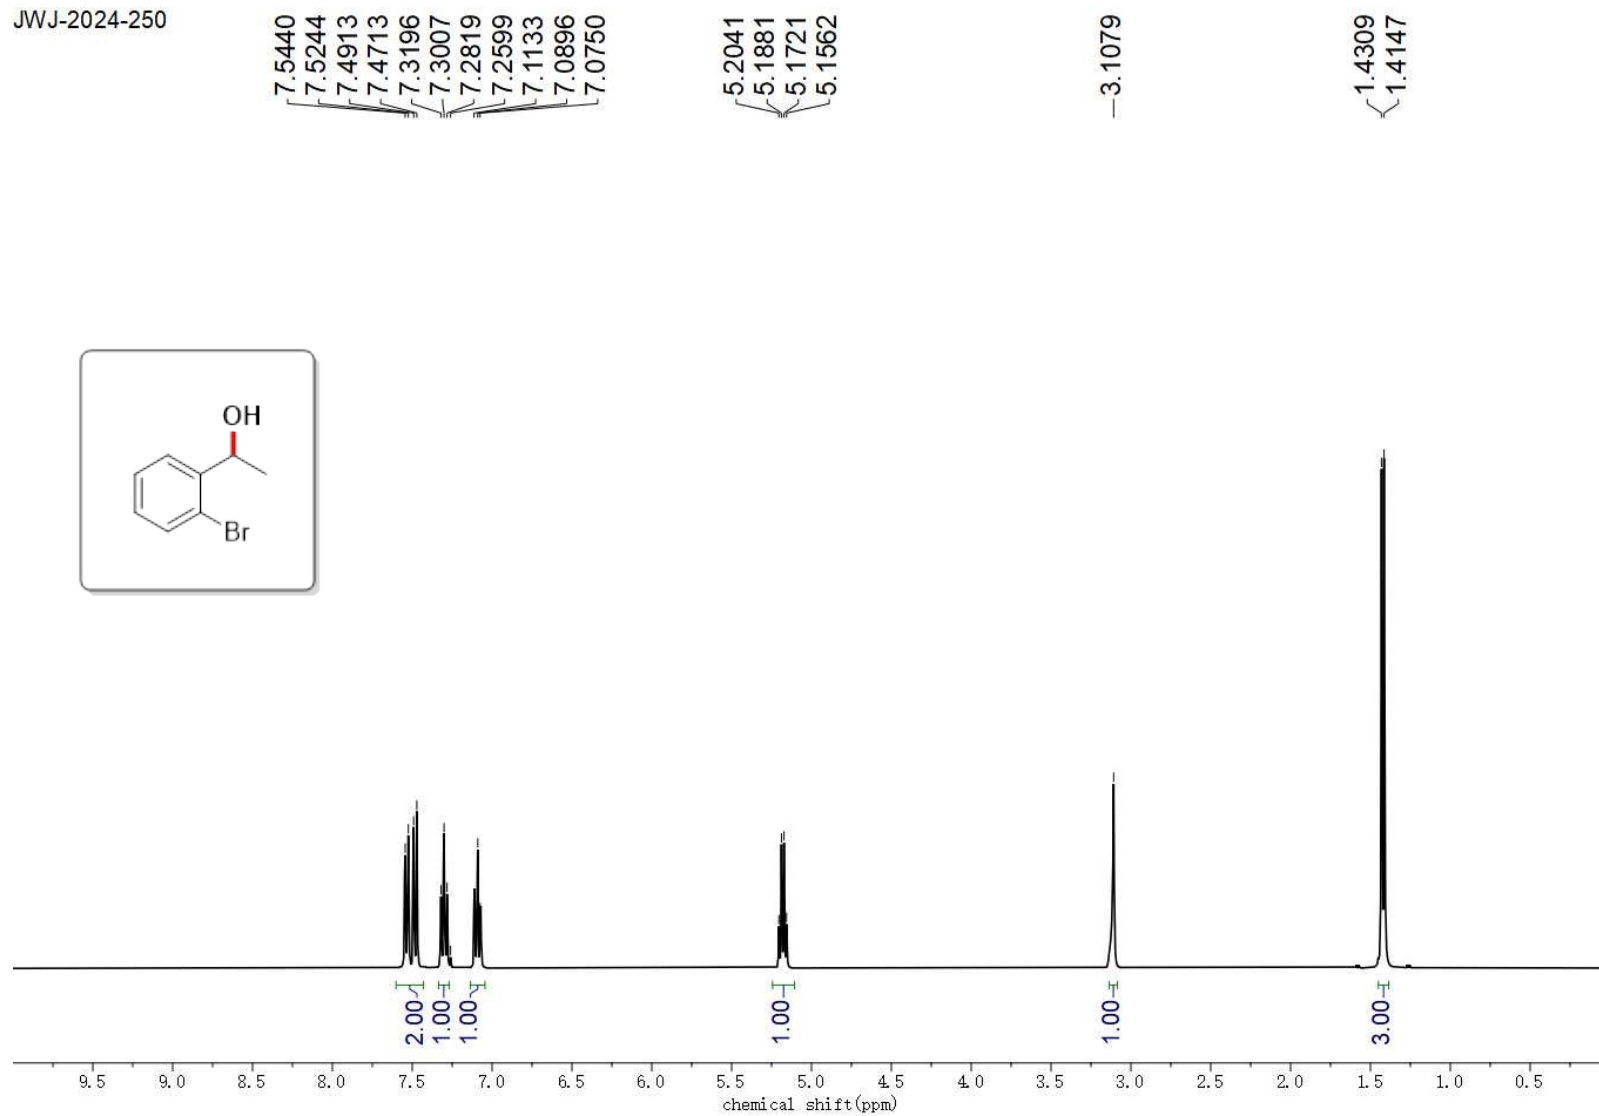

JWJ-2024-250

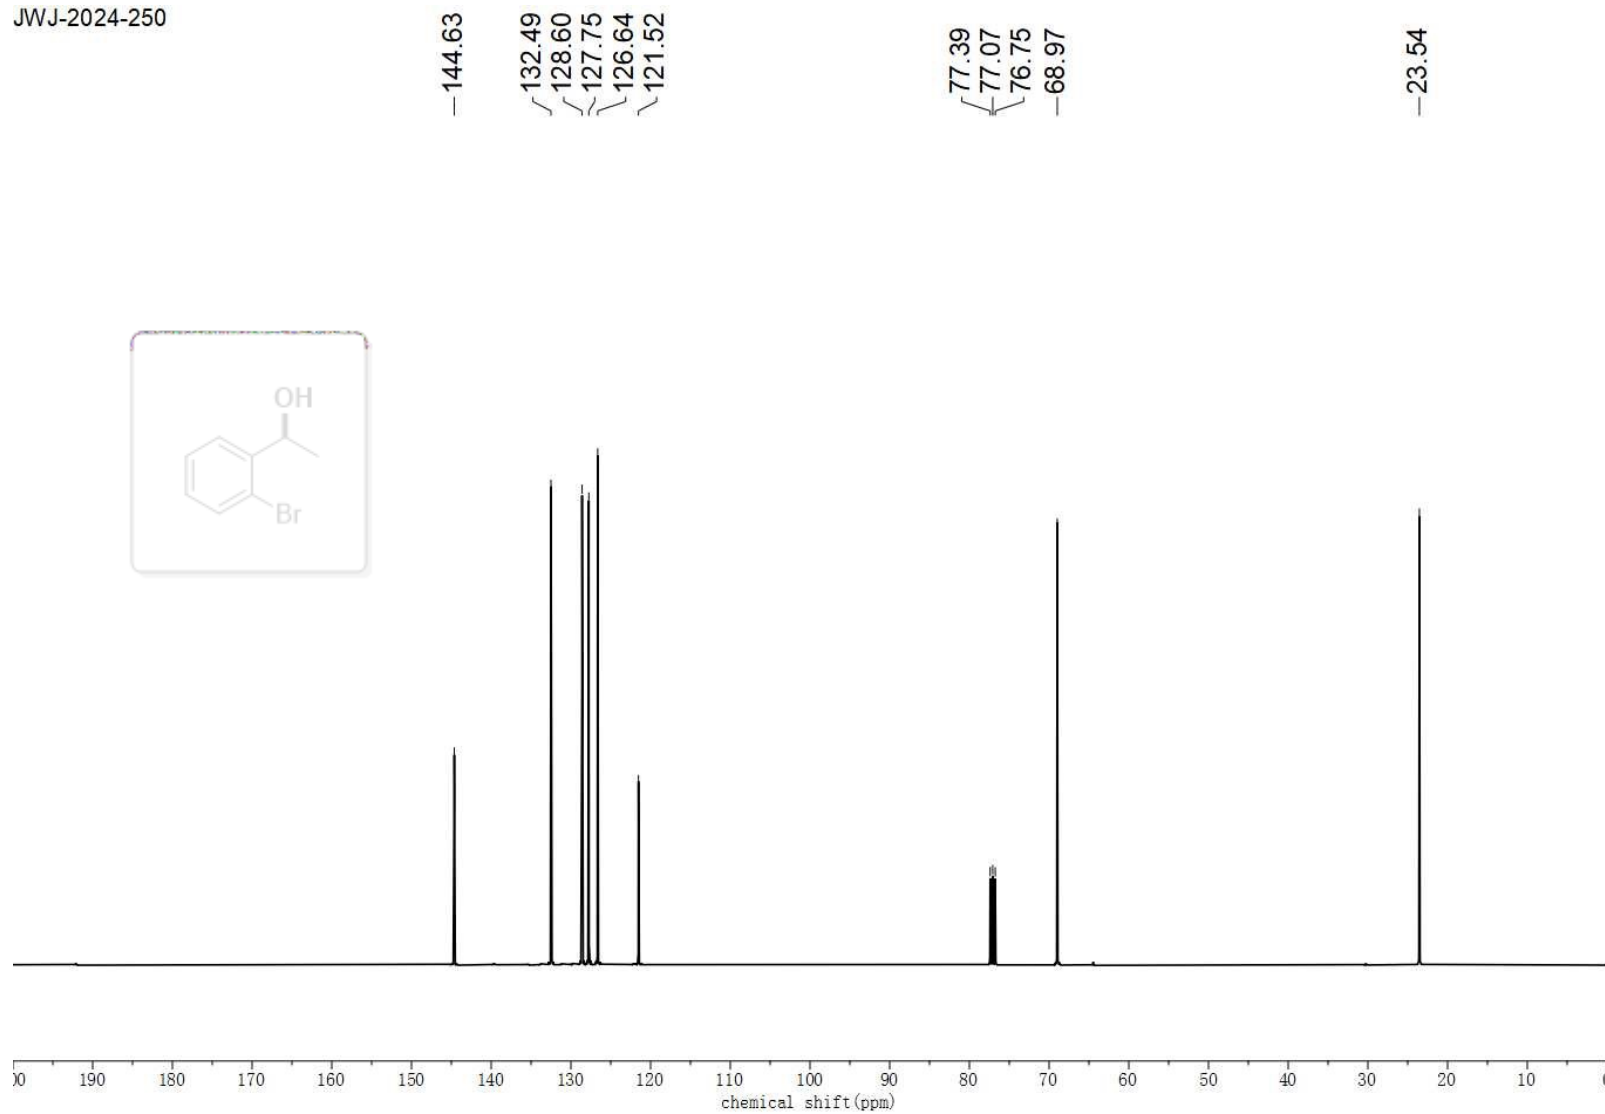



JWJ-2024-237

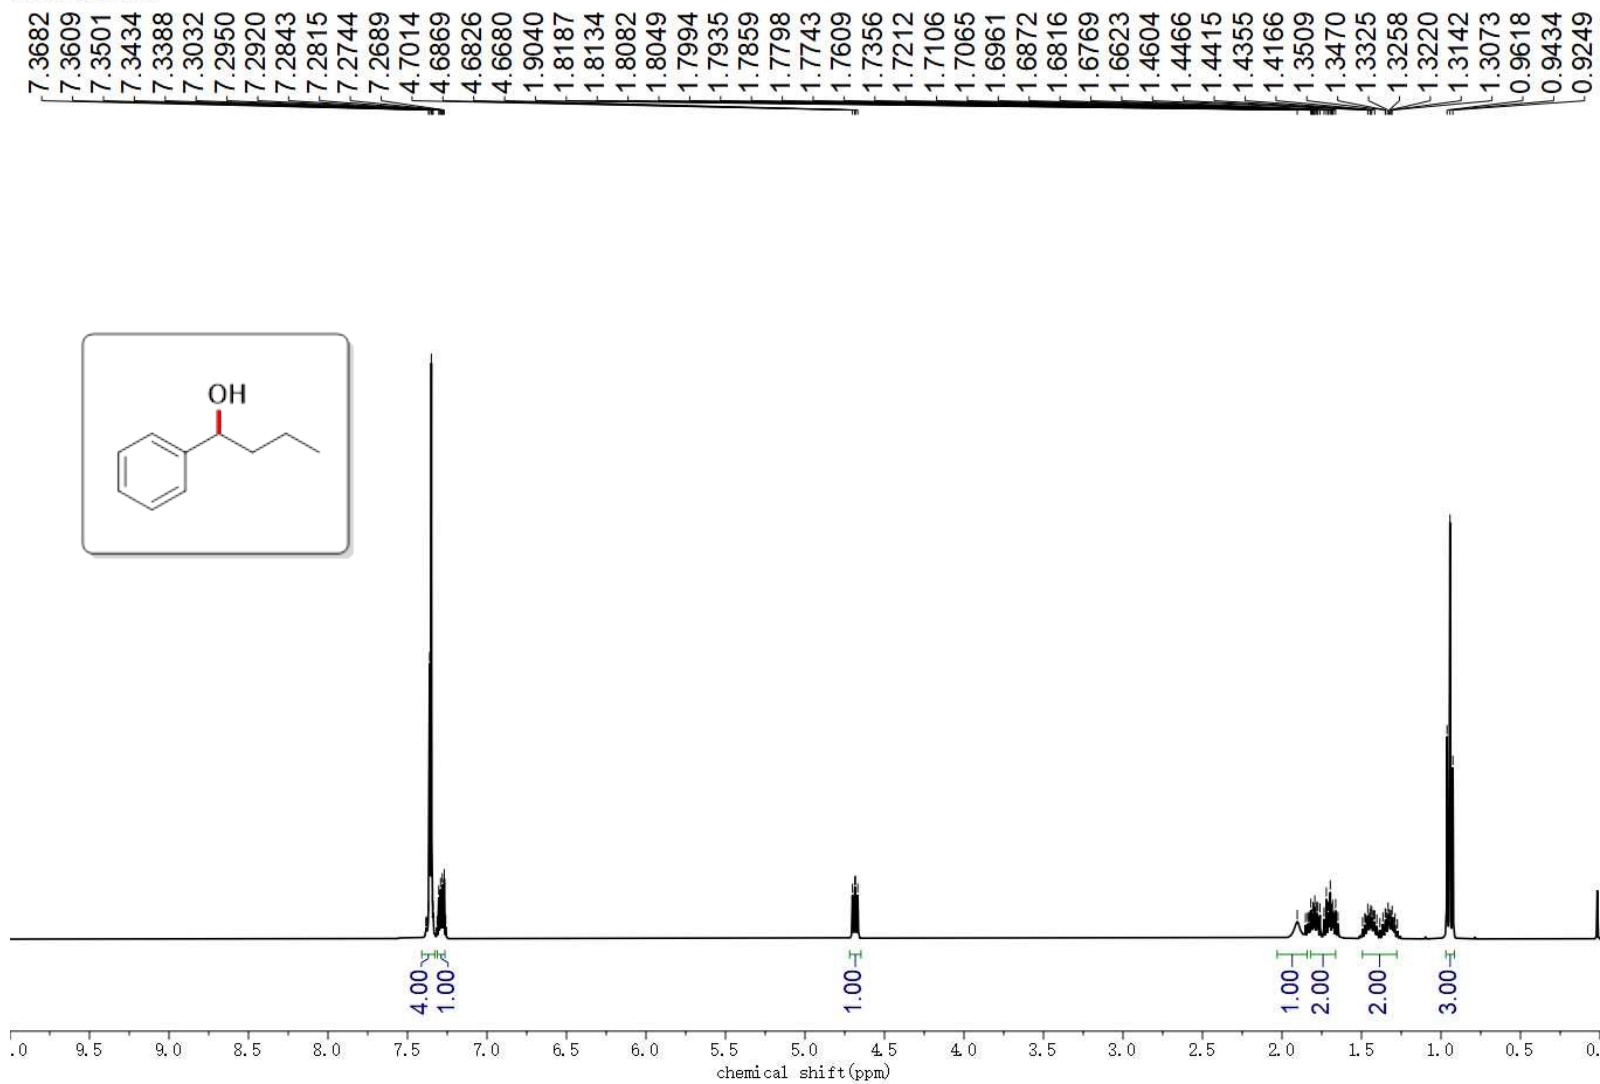

JWJ-2024-237

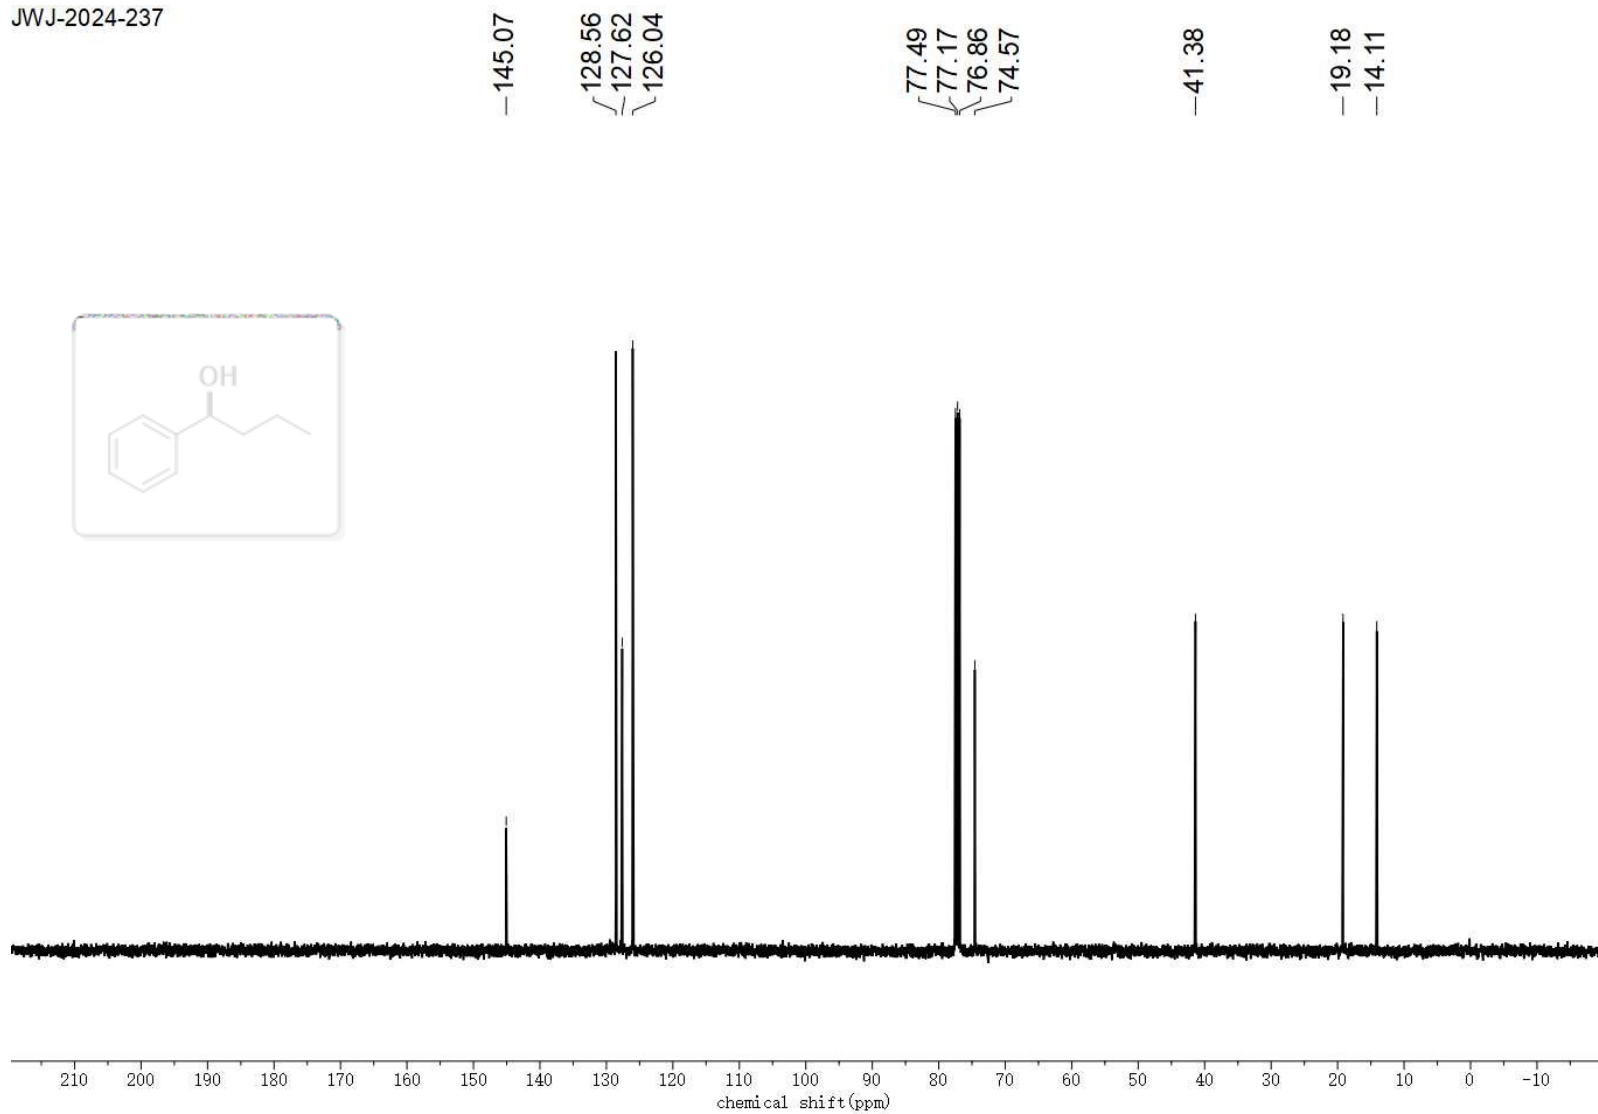

JWJ-2024-236

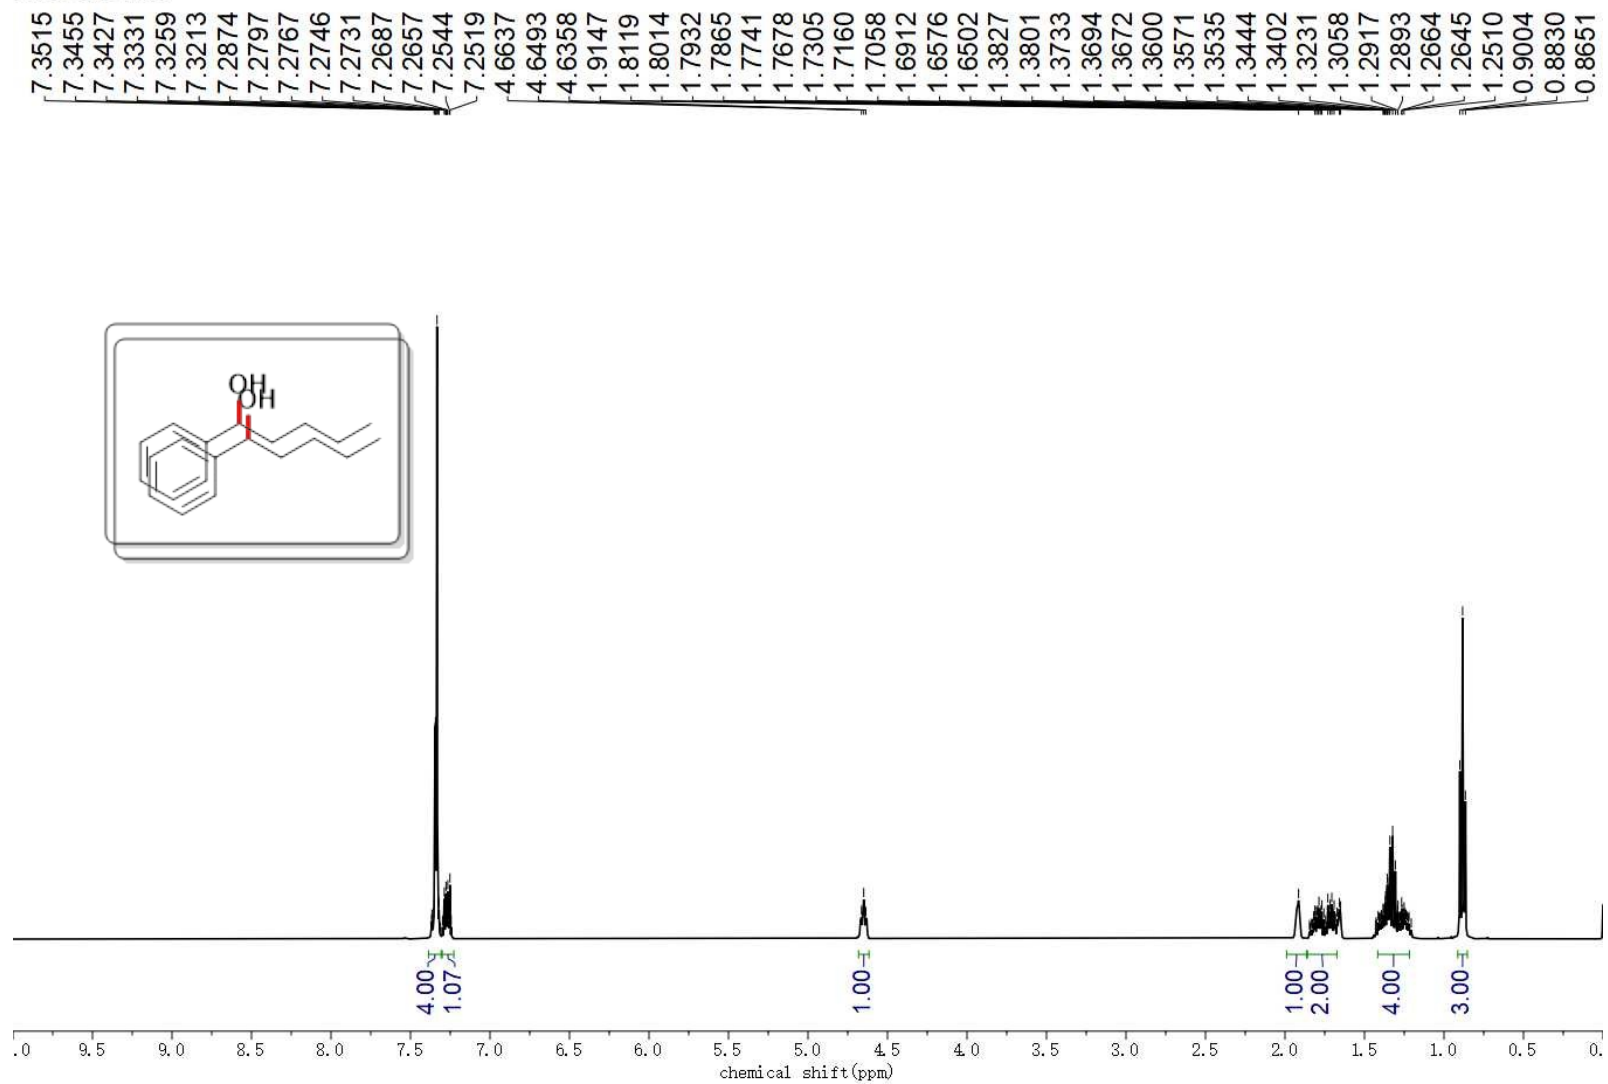

JWJ-2024-236

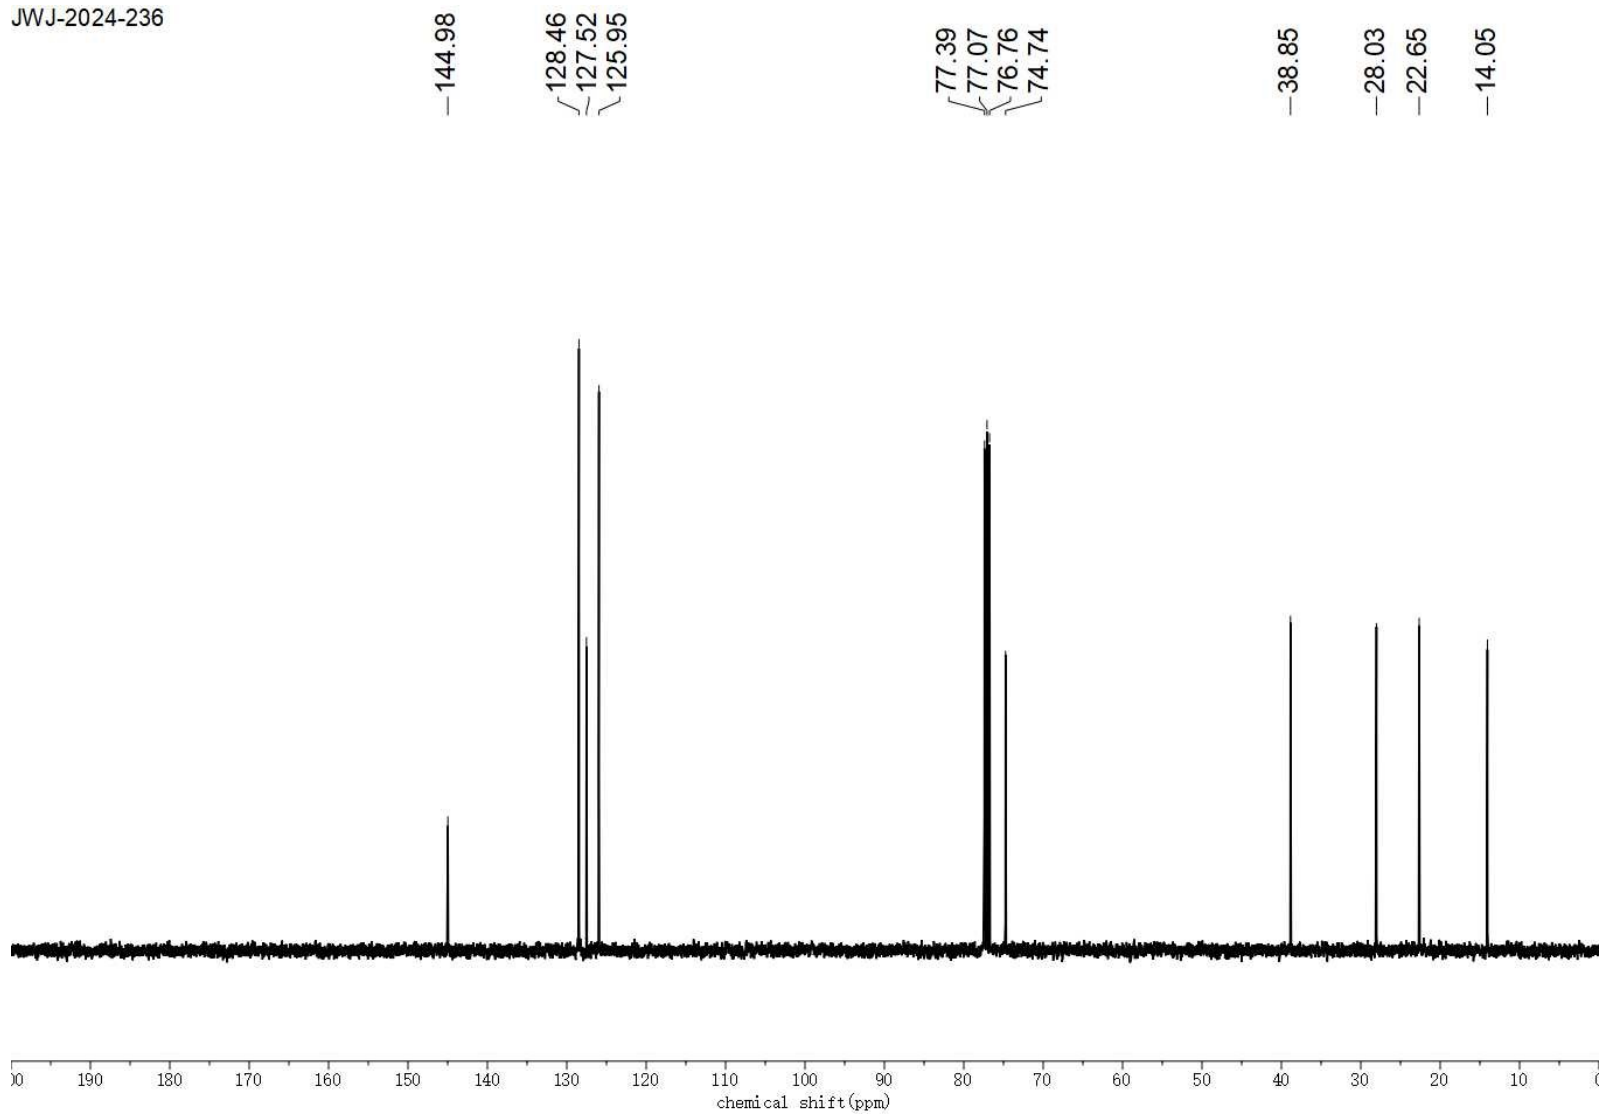

JWJ-2024-251

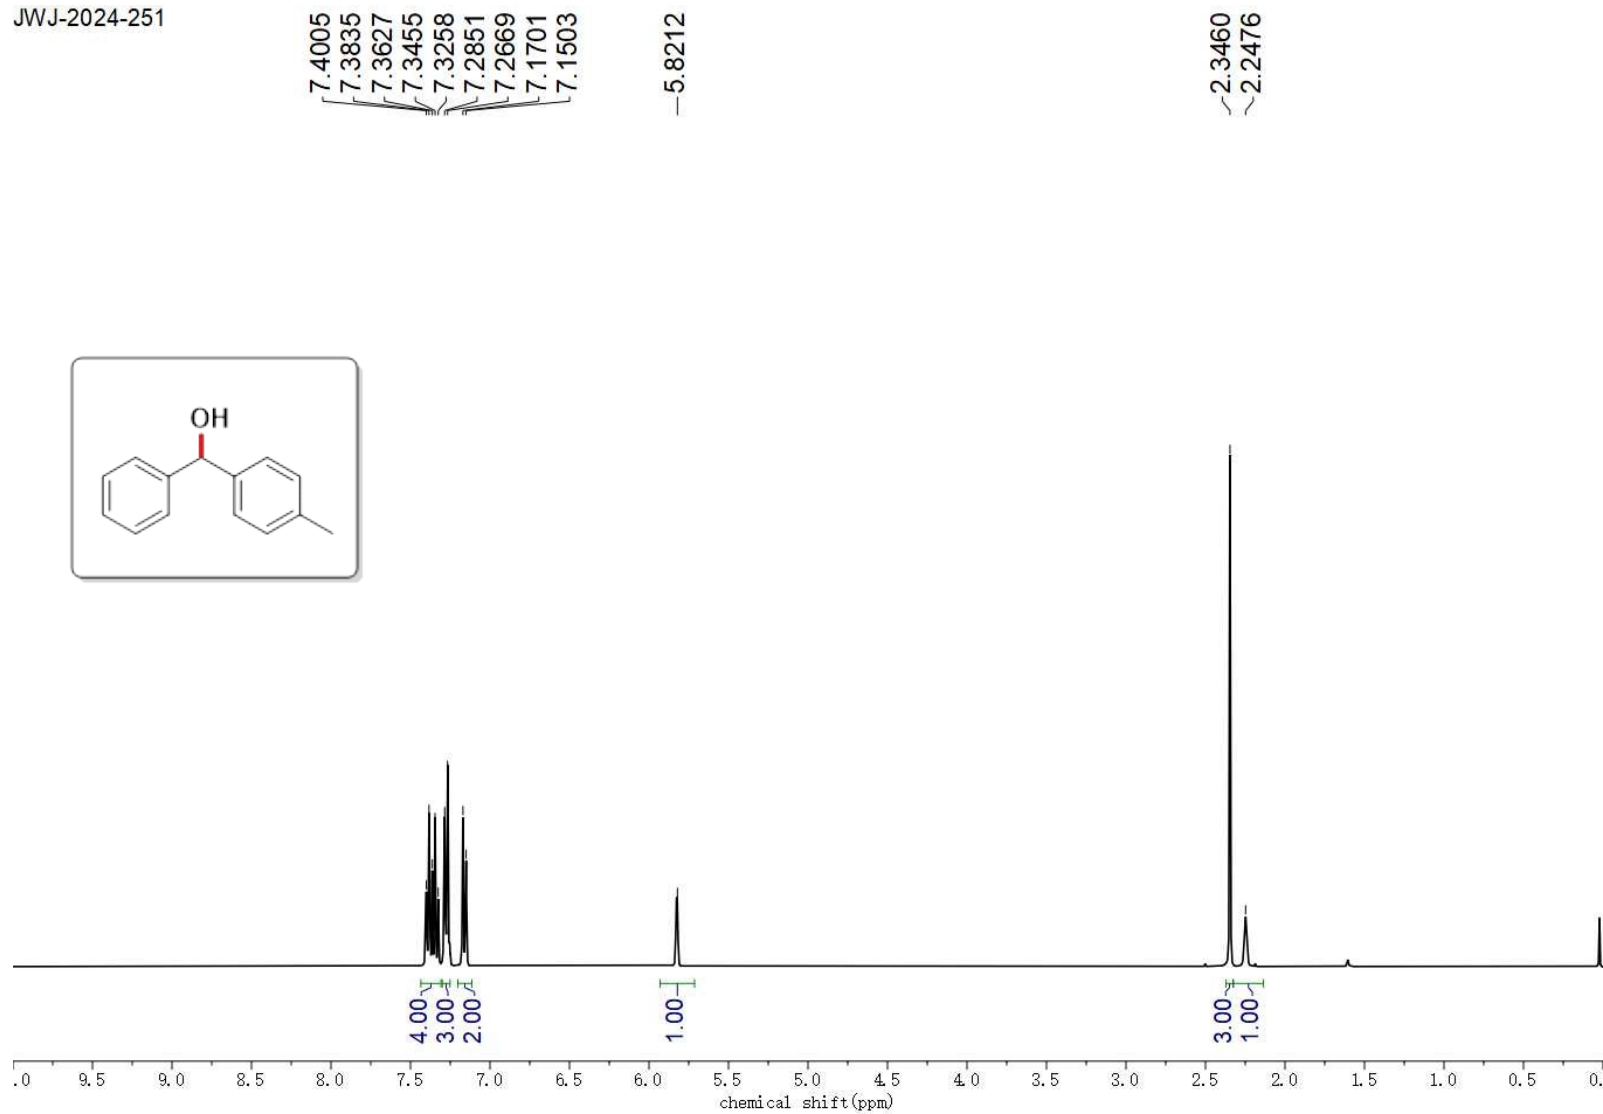

JWJ-2024-251

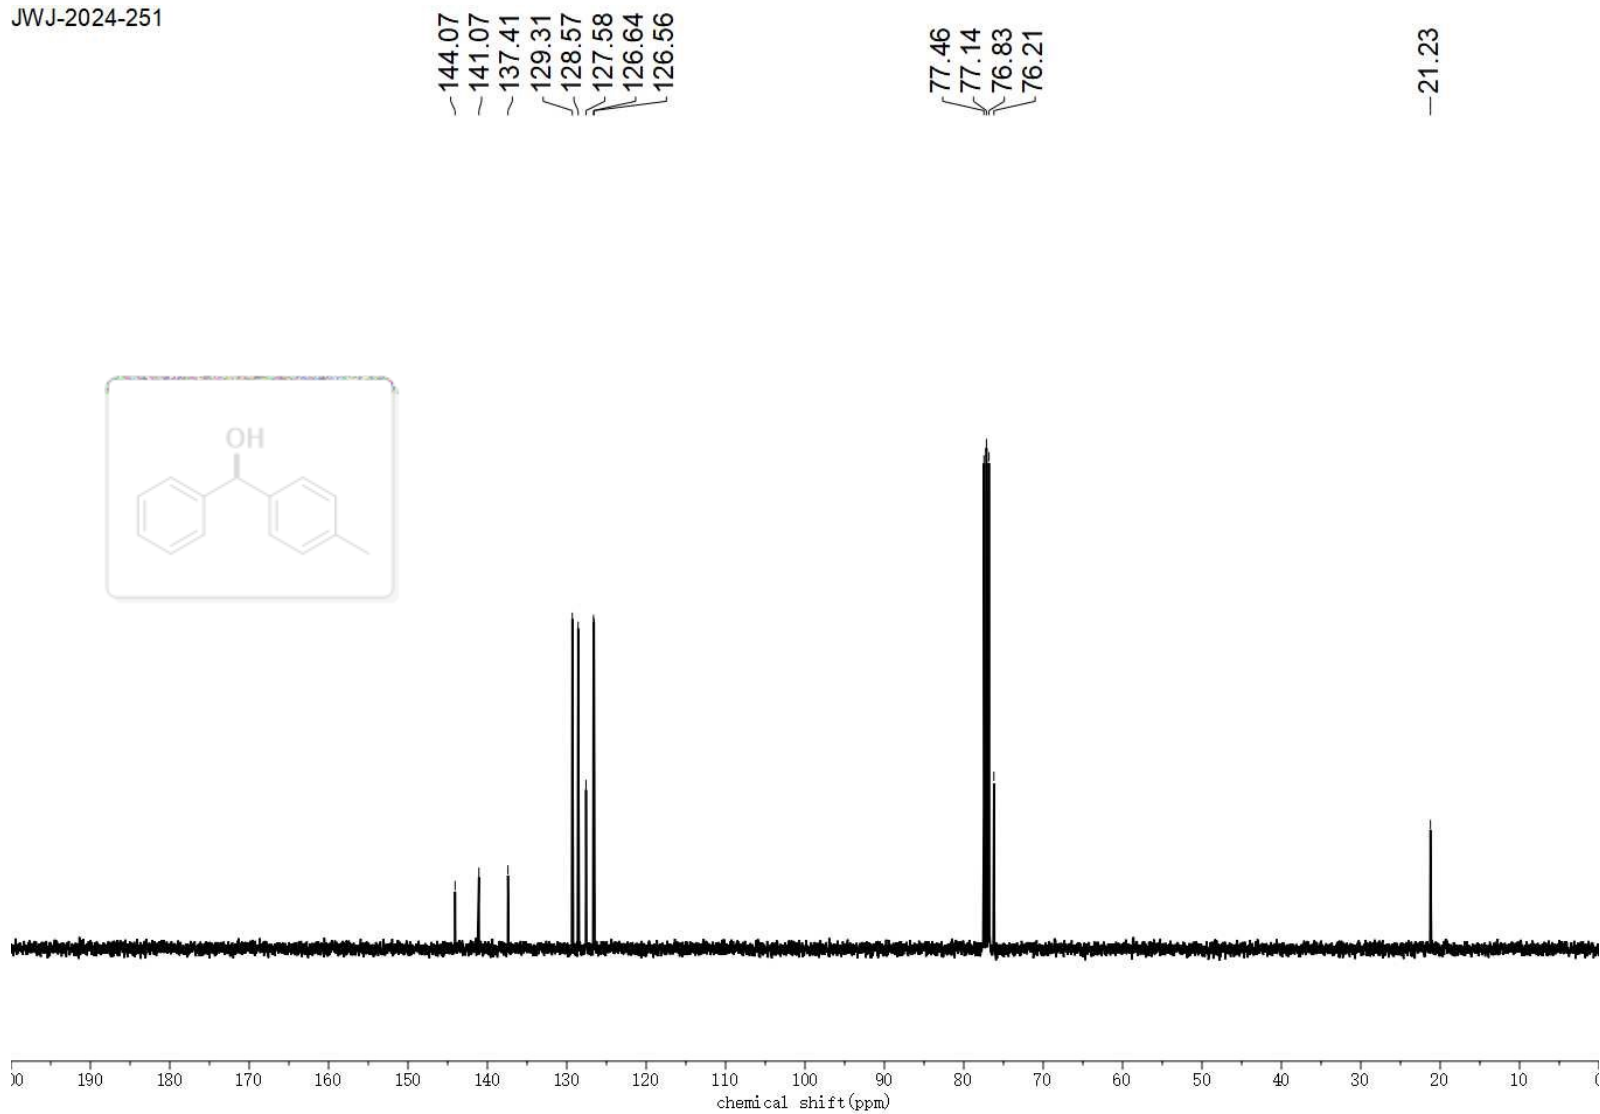

JWJ-2024-252

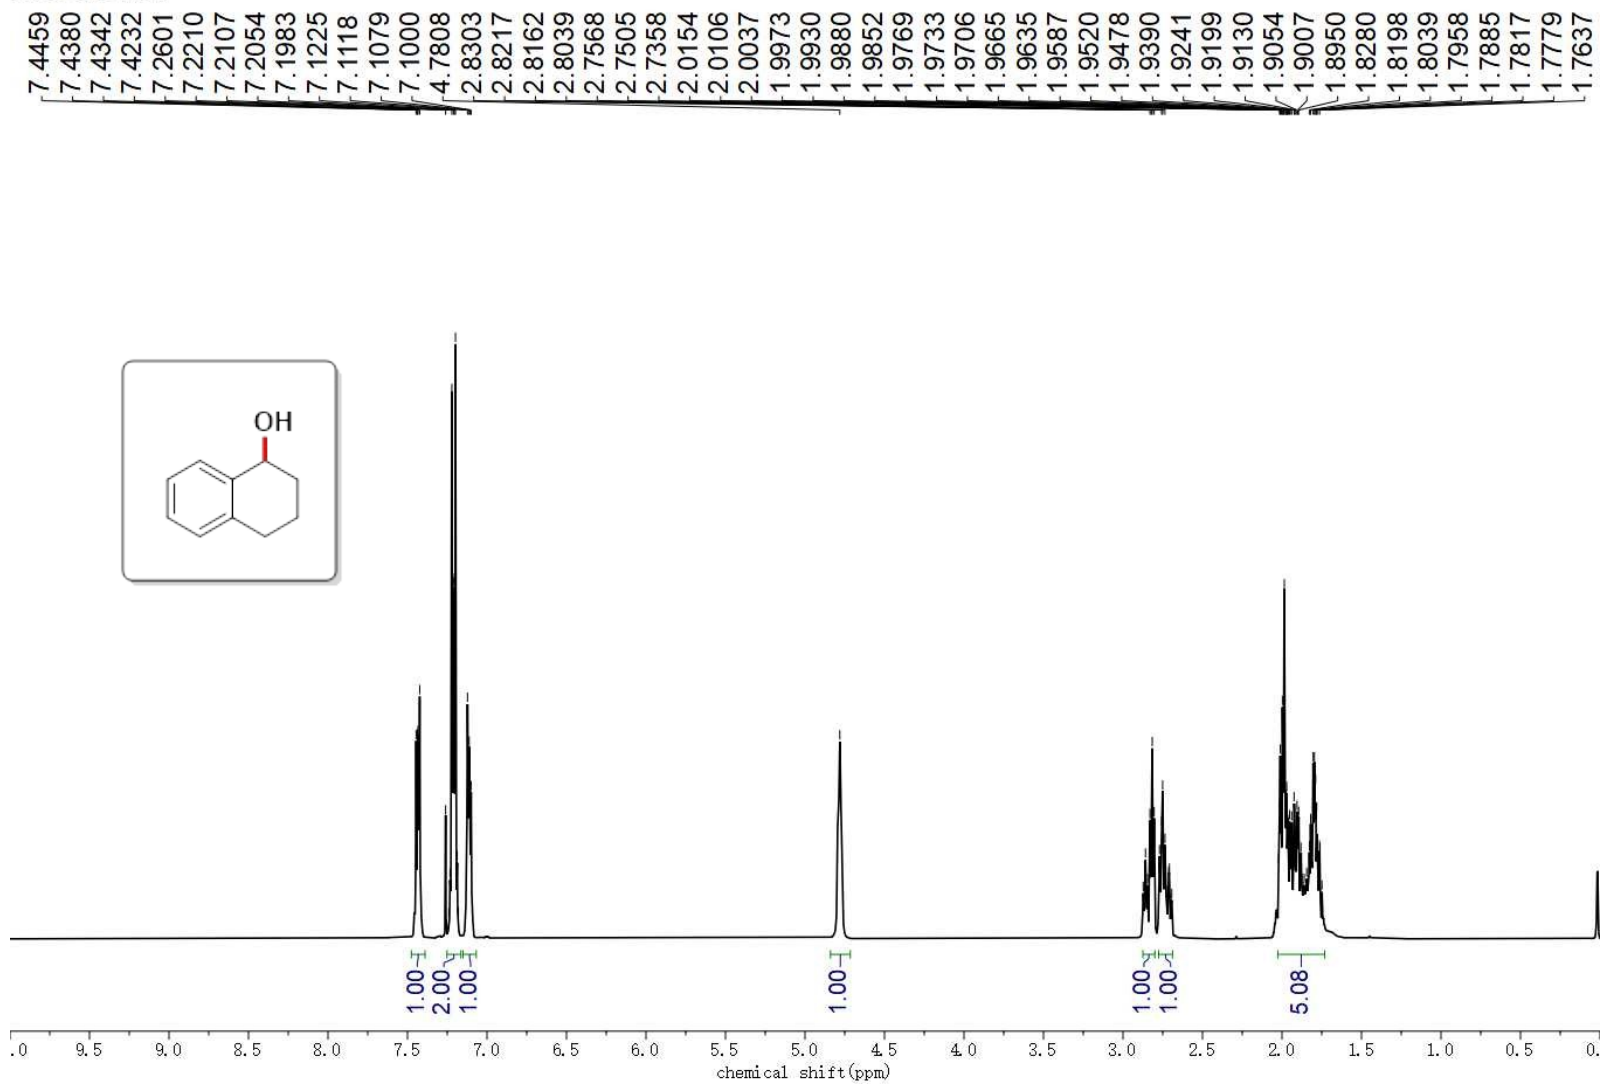

JWJ-2024-252

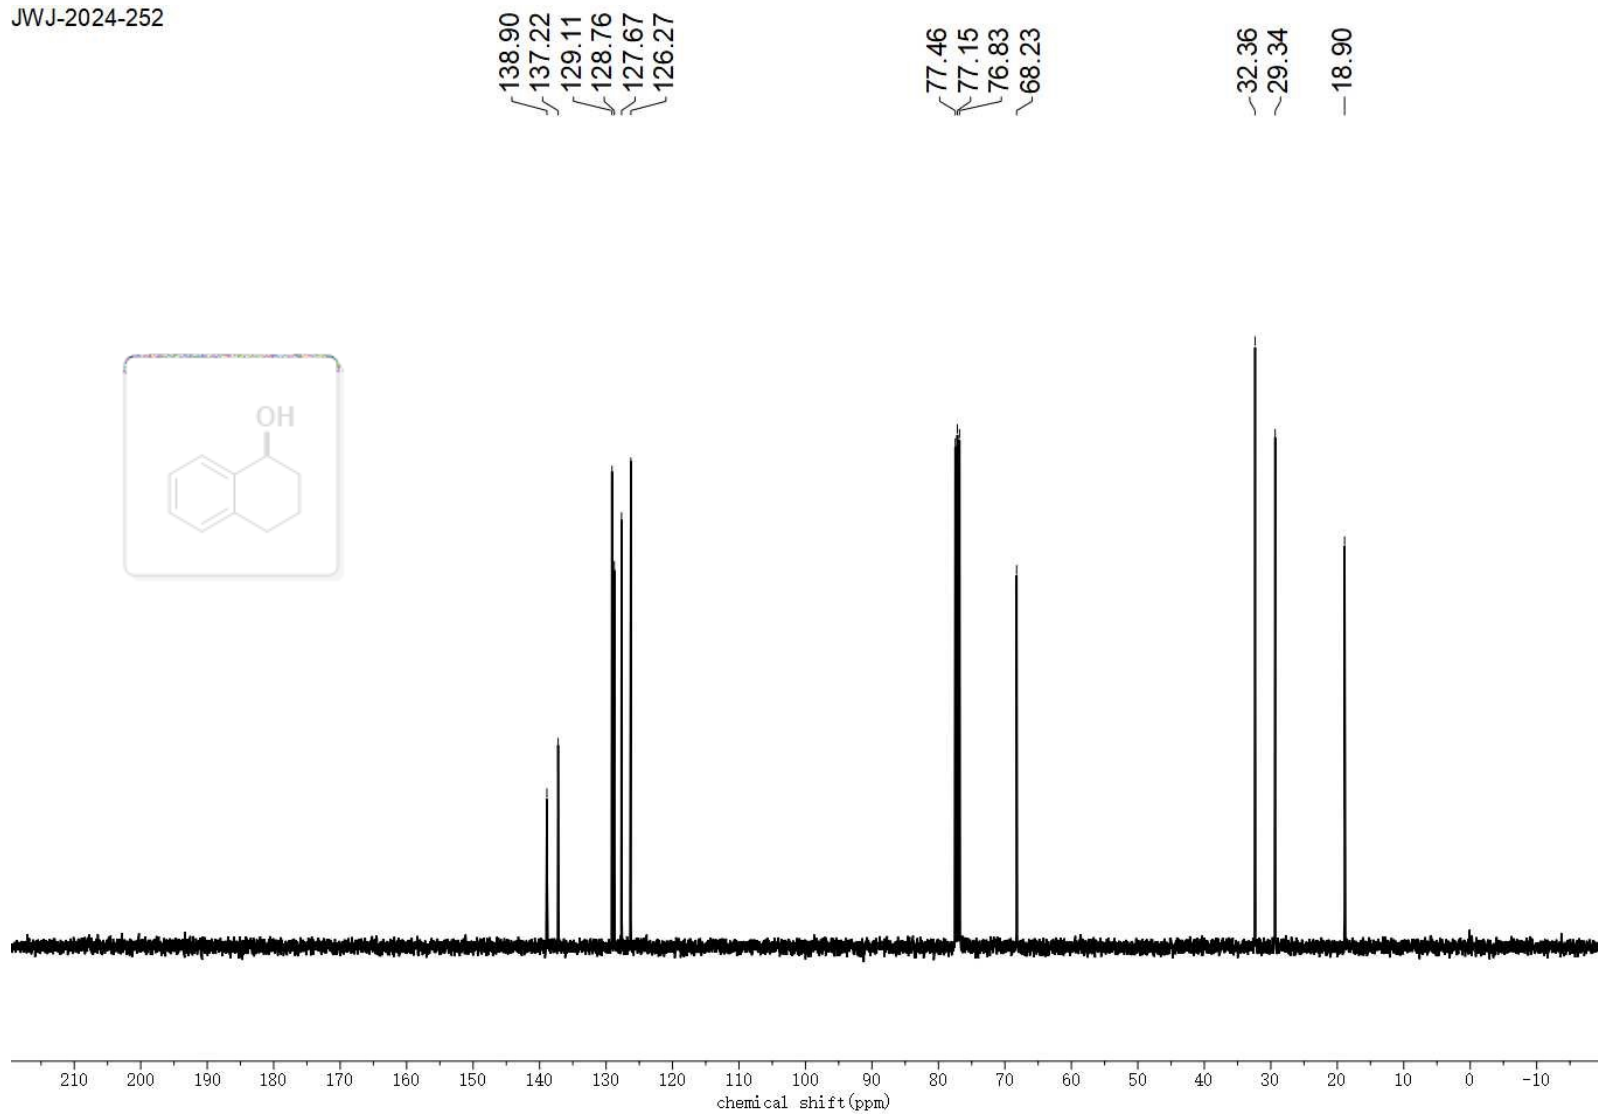



JWJ-2024-259

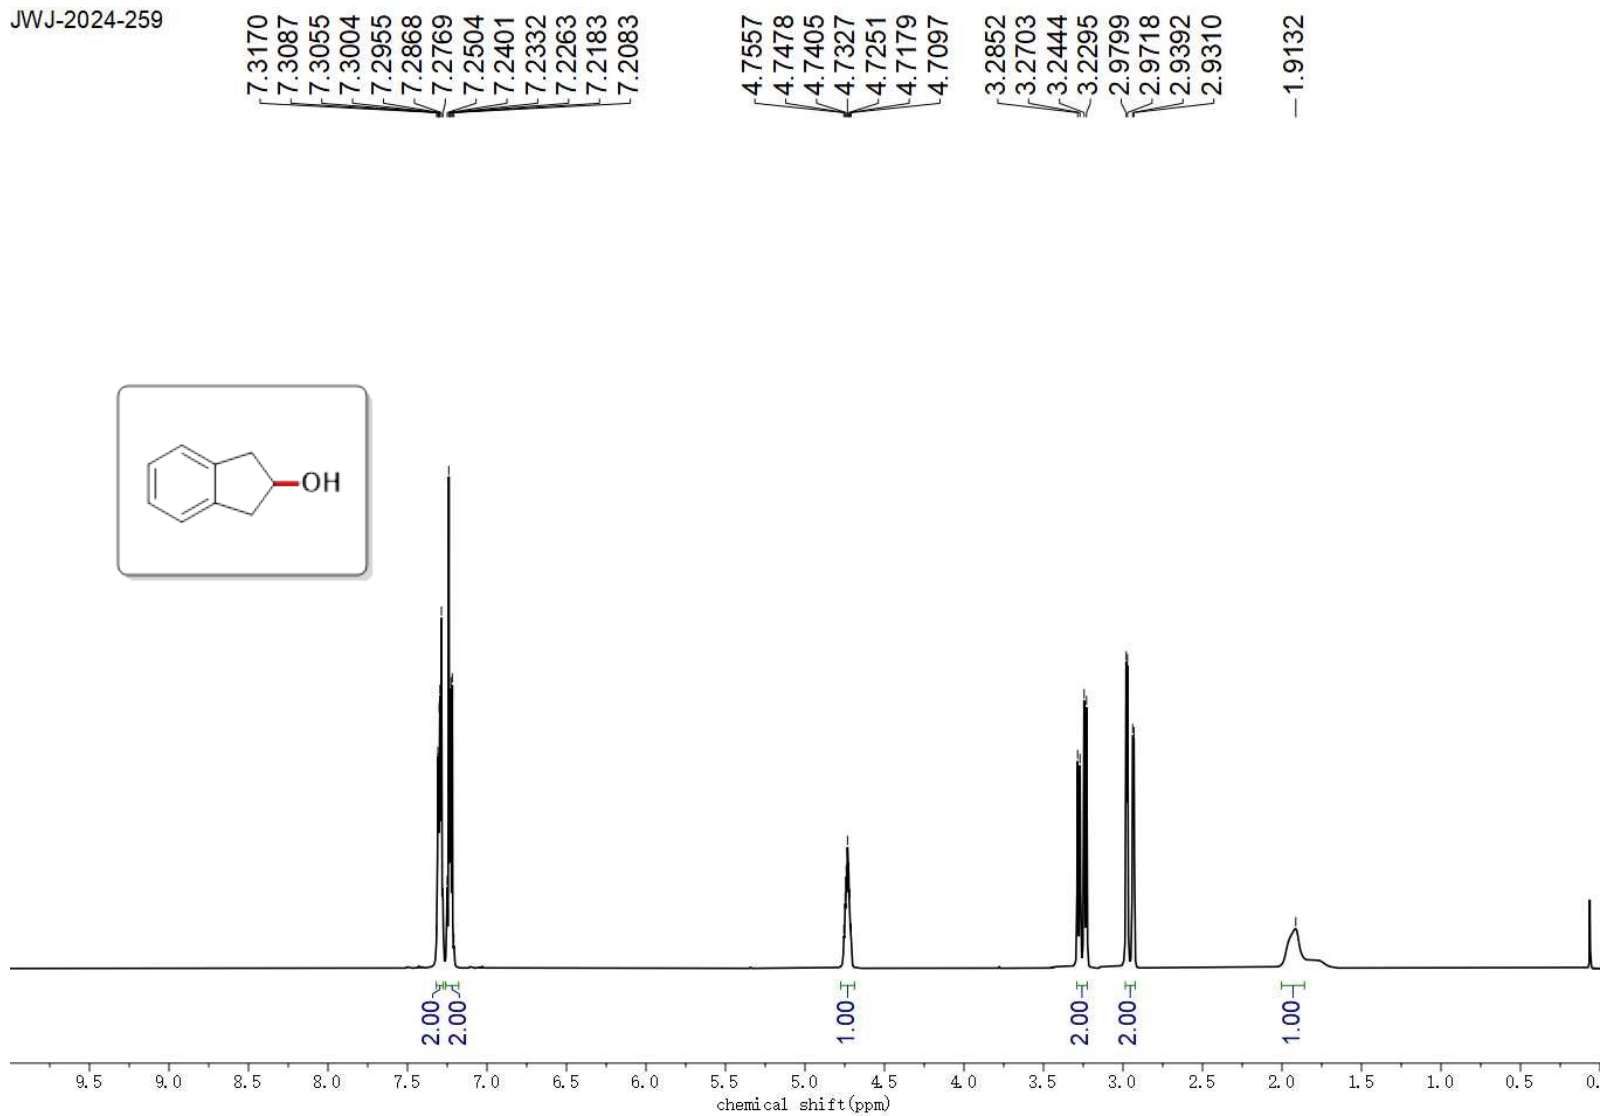

JWJ-2024-259

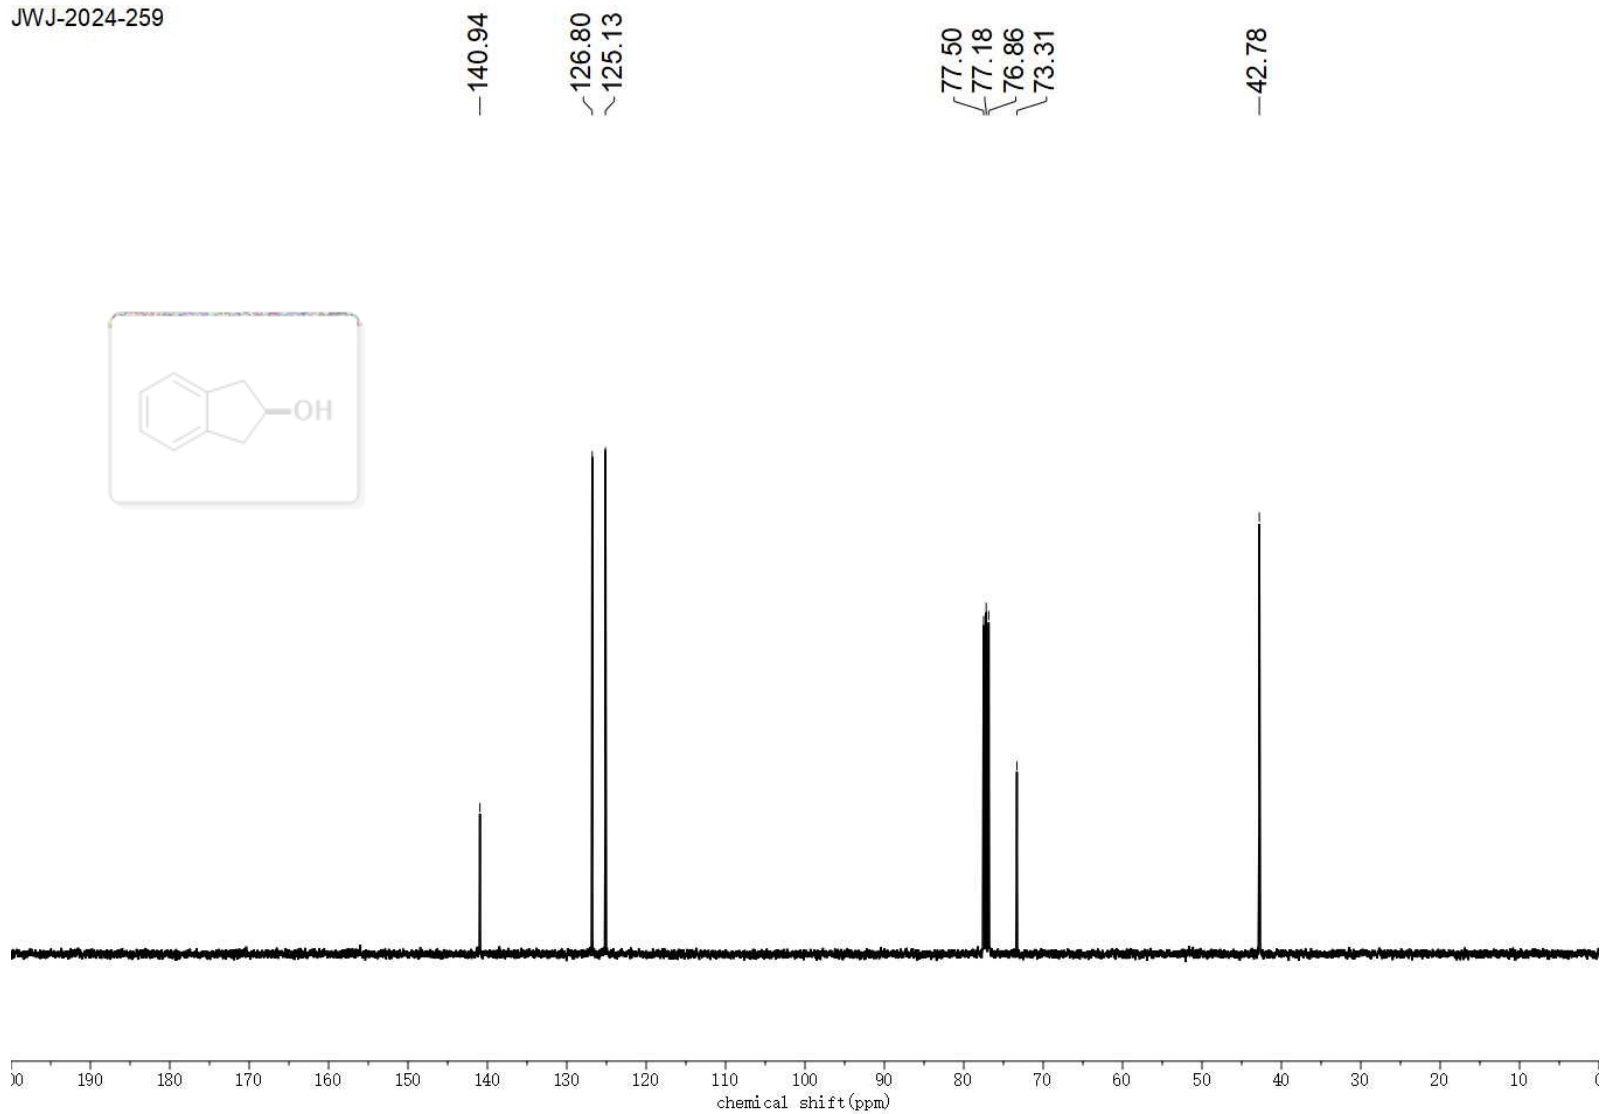

JWJ-2024-253

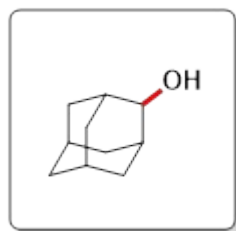

—7.2601

—3.8608

2.0773  
2.0459  
1.8731  
1.8610  
1.8262  
1.8190  
1.8012  
1.7938  
1.7868  
1.7044  
1.6719  
1.5298  
1.5045

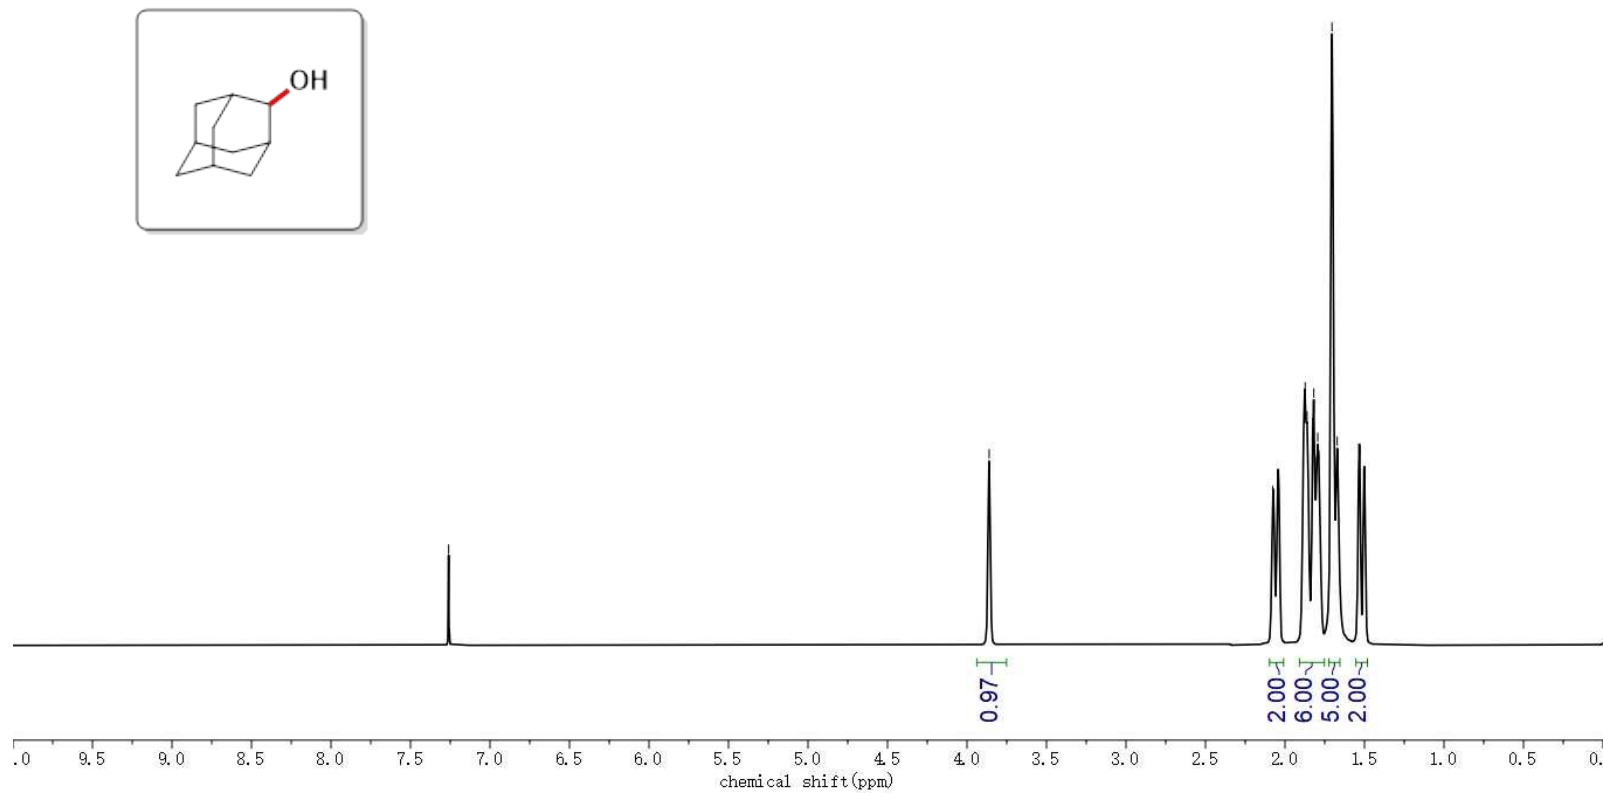

JWJ-2024-253

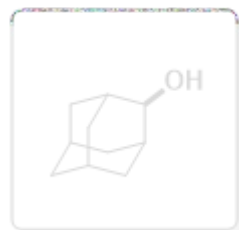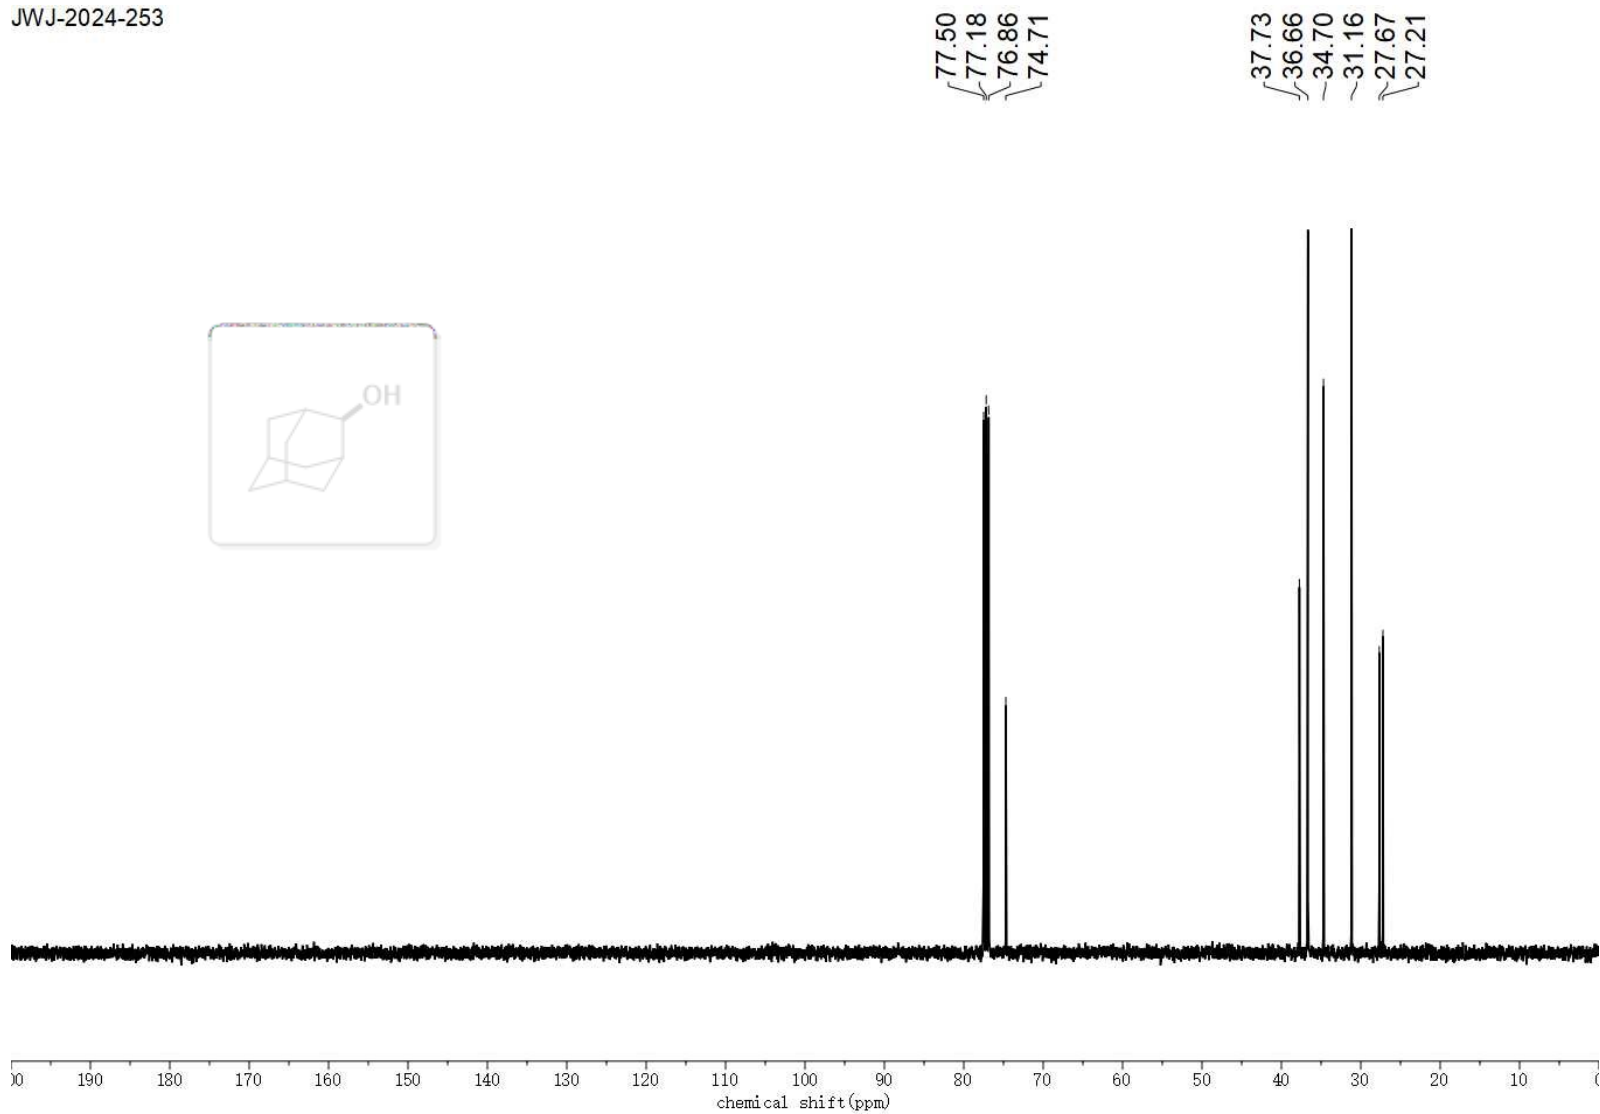

JWJ-2024-321

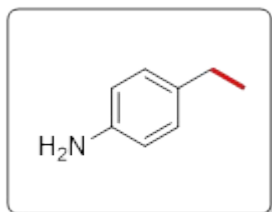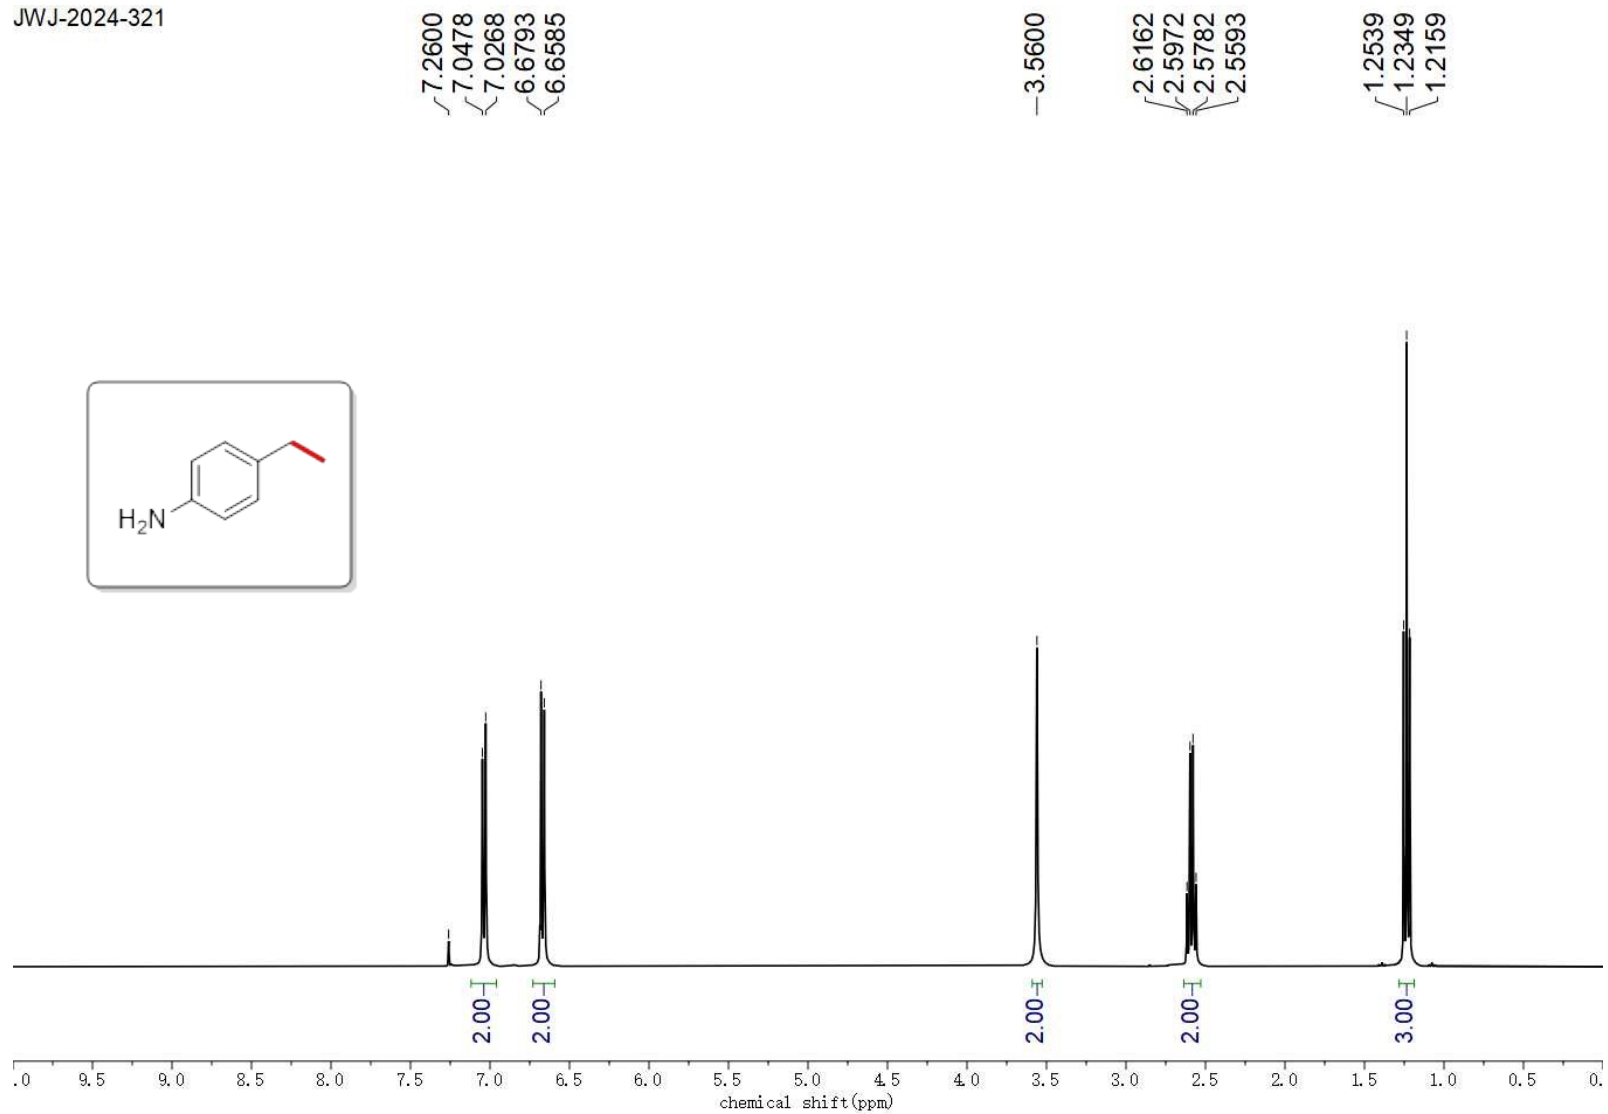

JWJ-2024-321

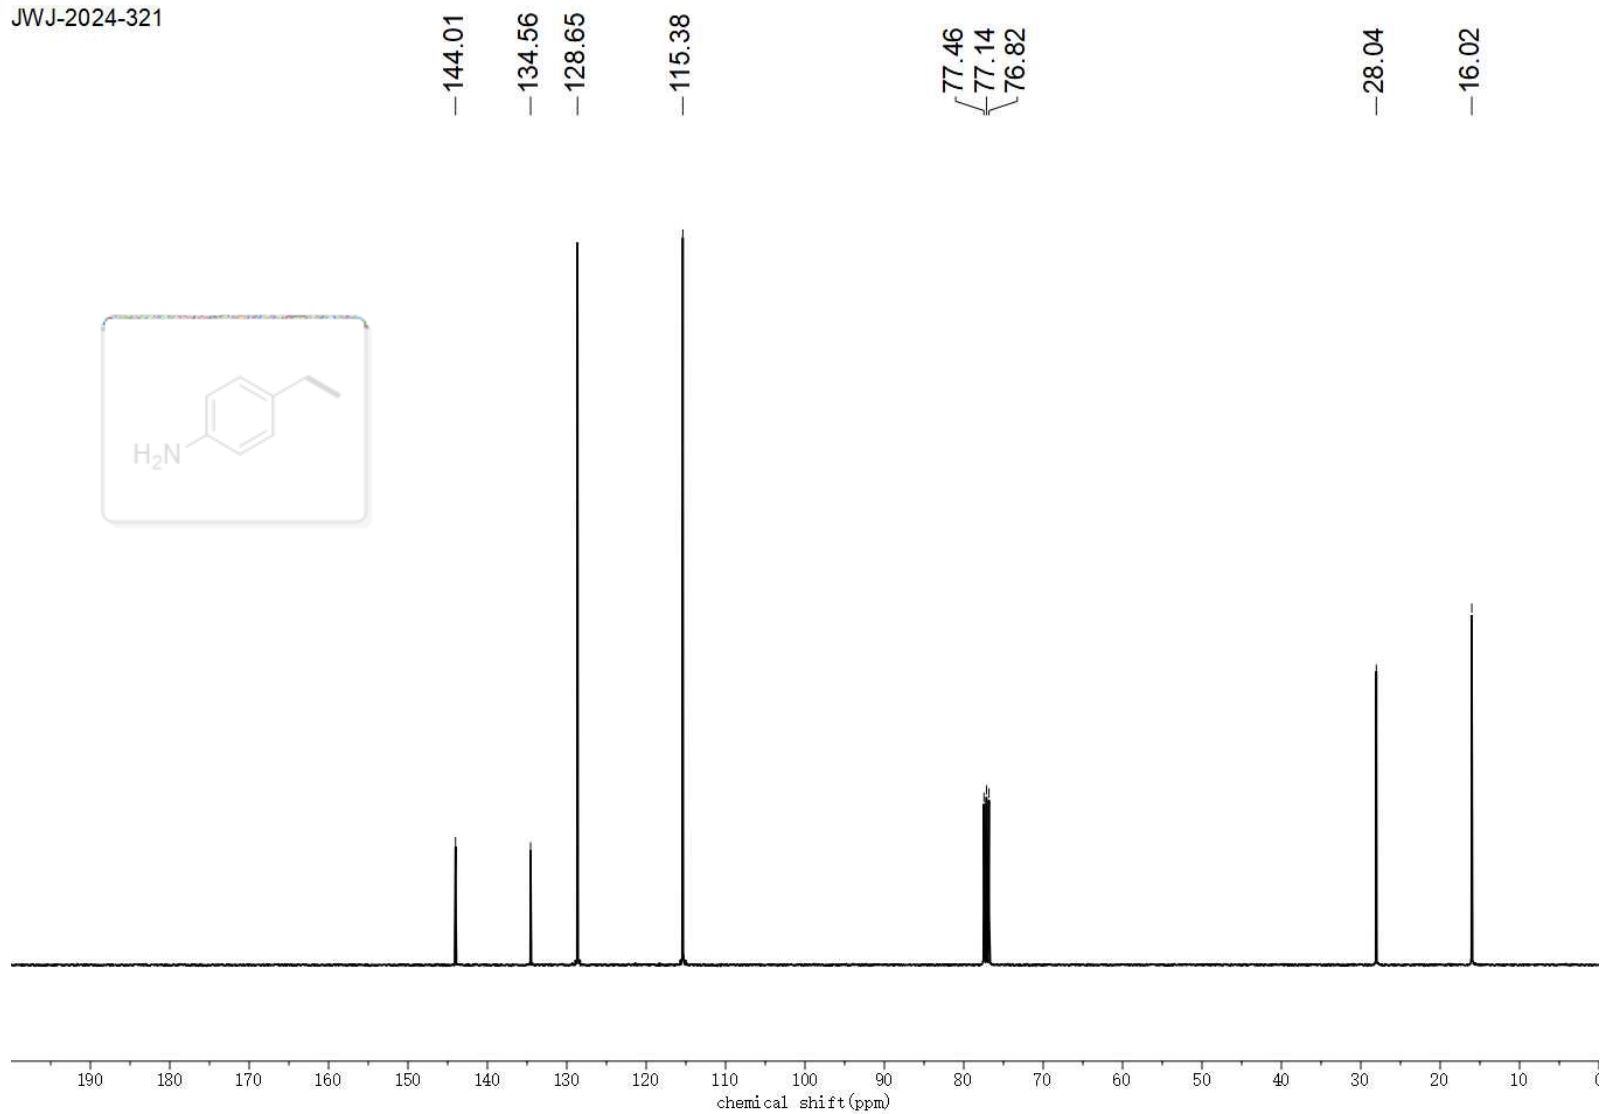

JWJ-2024-352

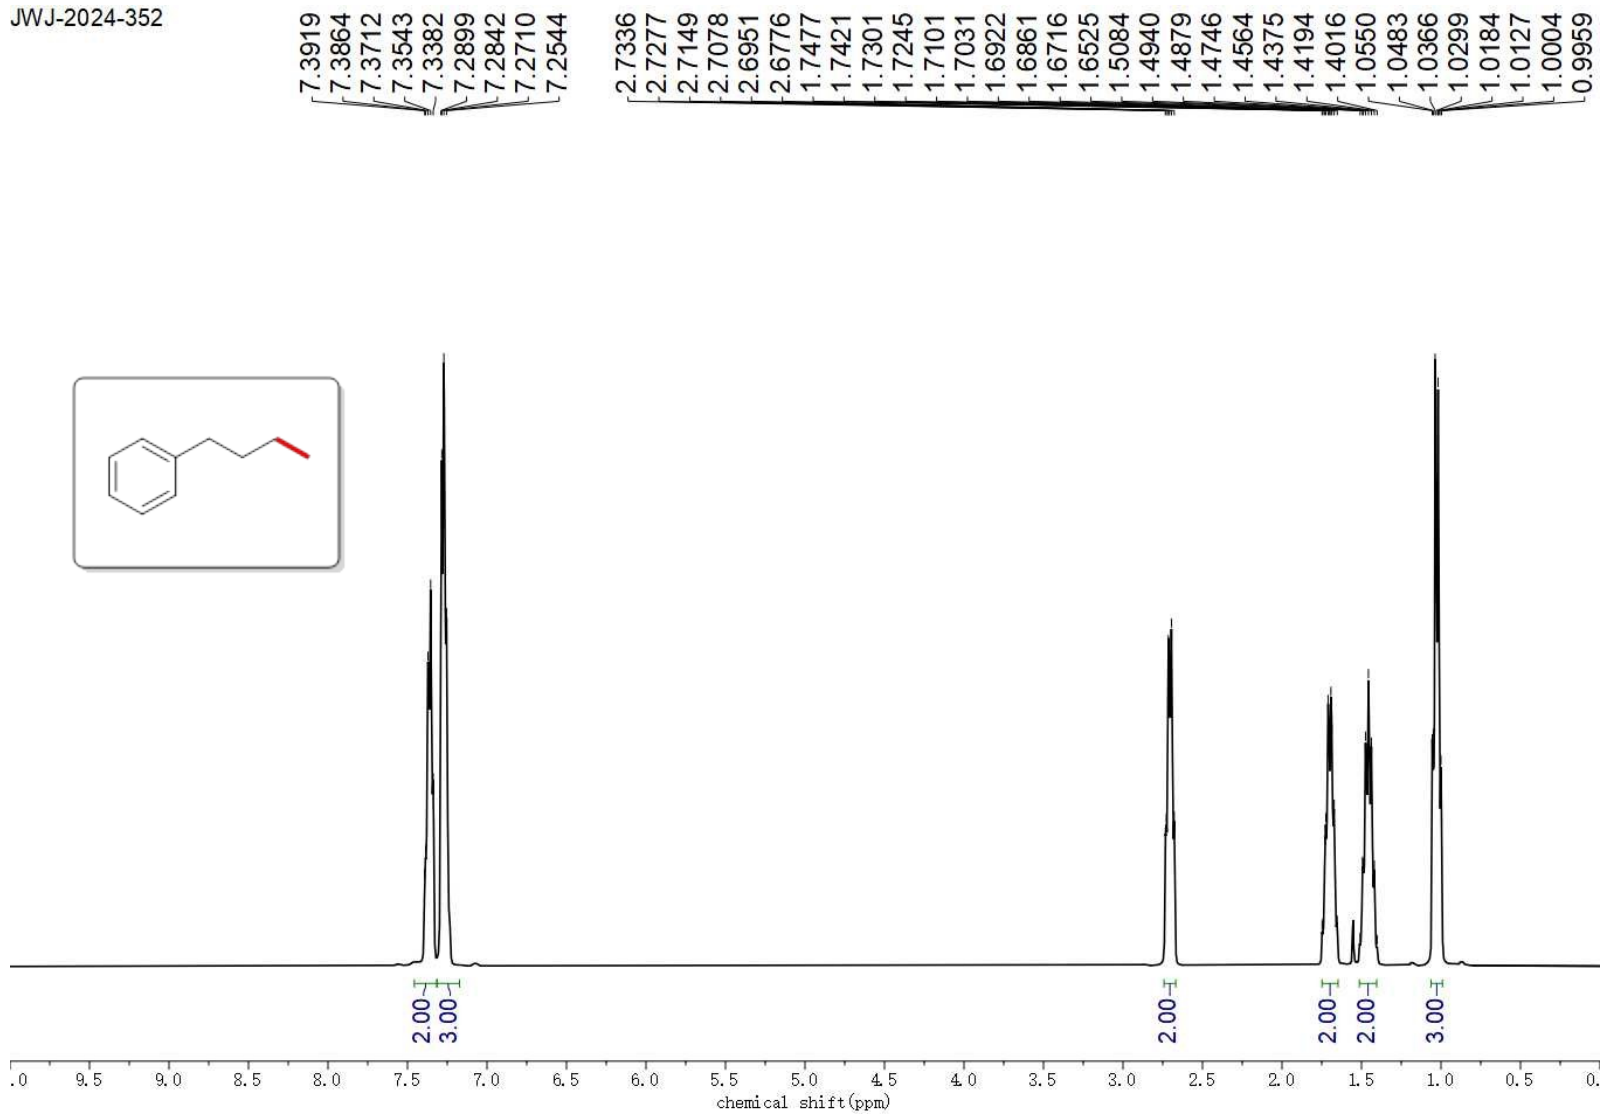

JWJ-2024-352

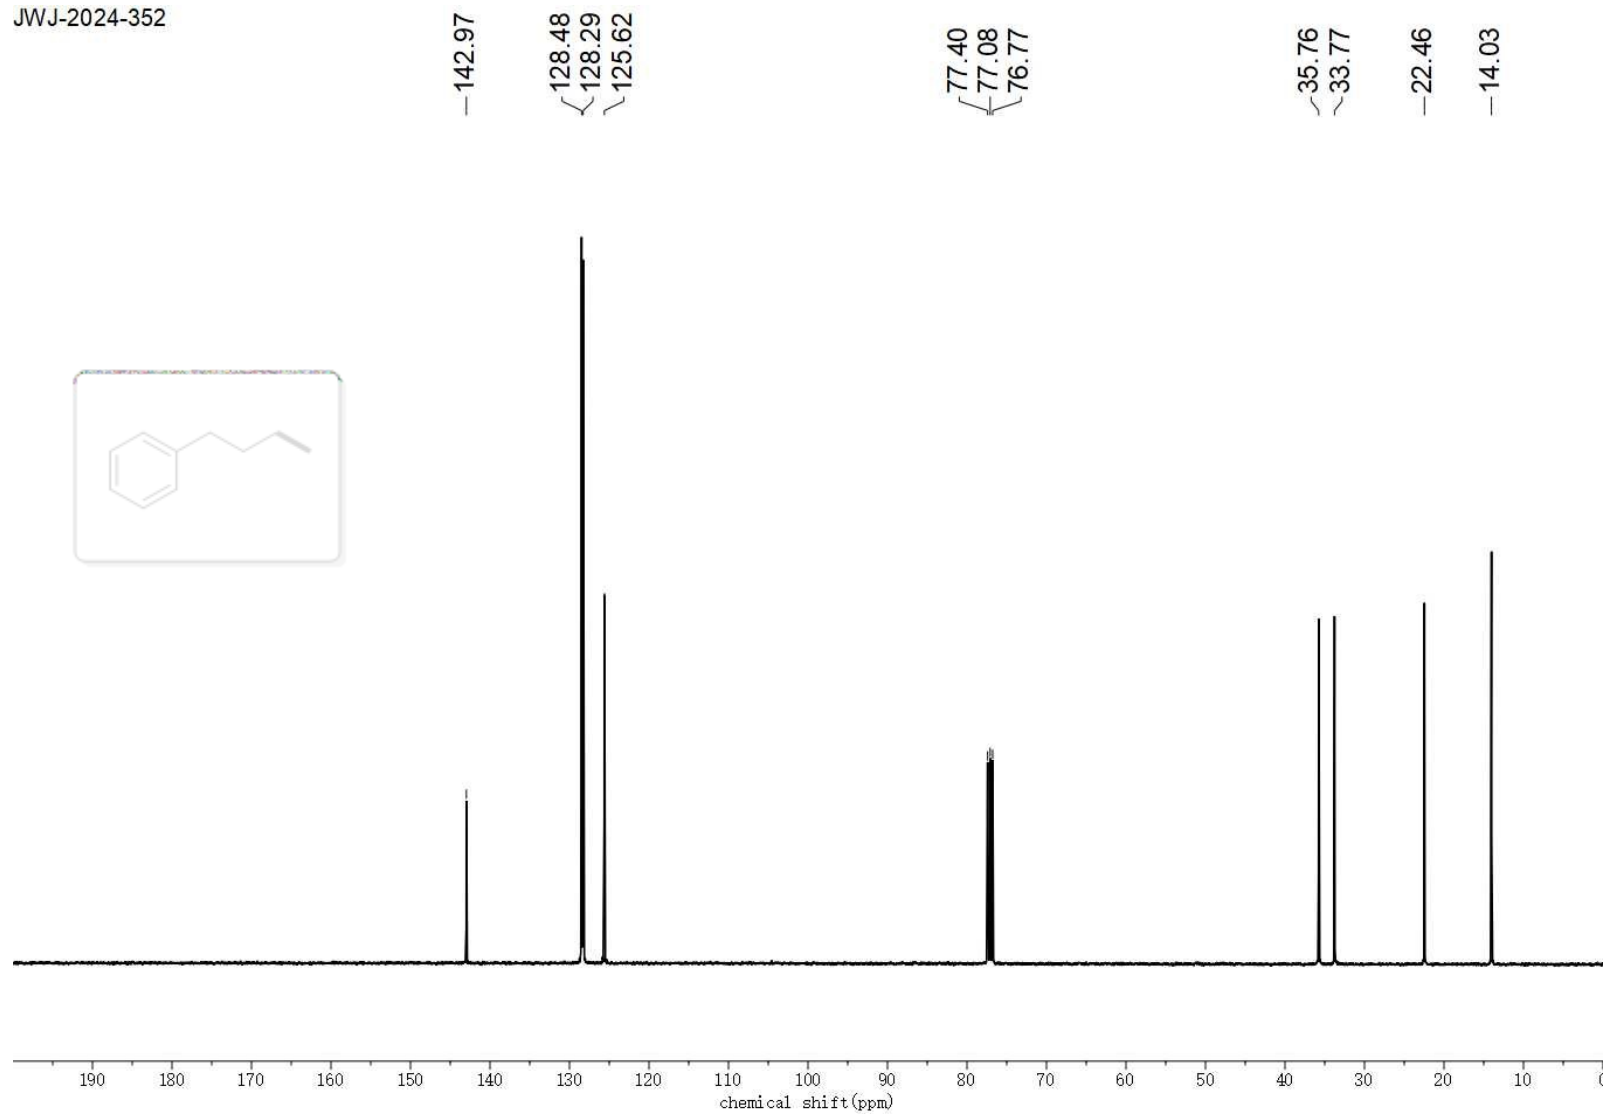



JWJ-2024-407

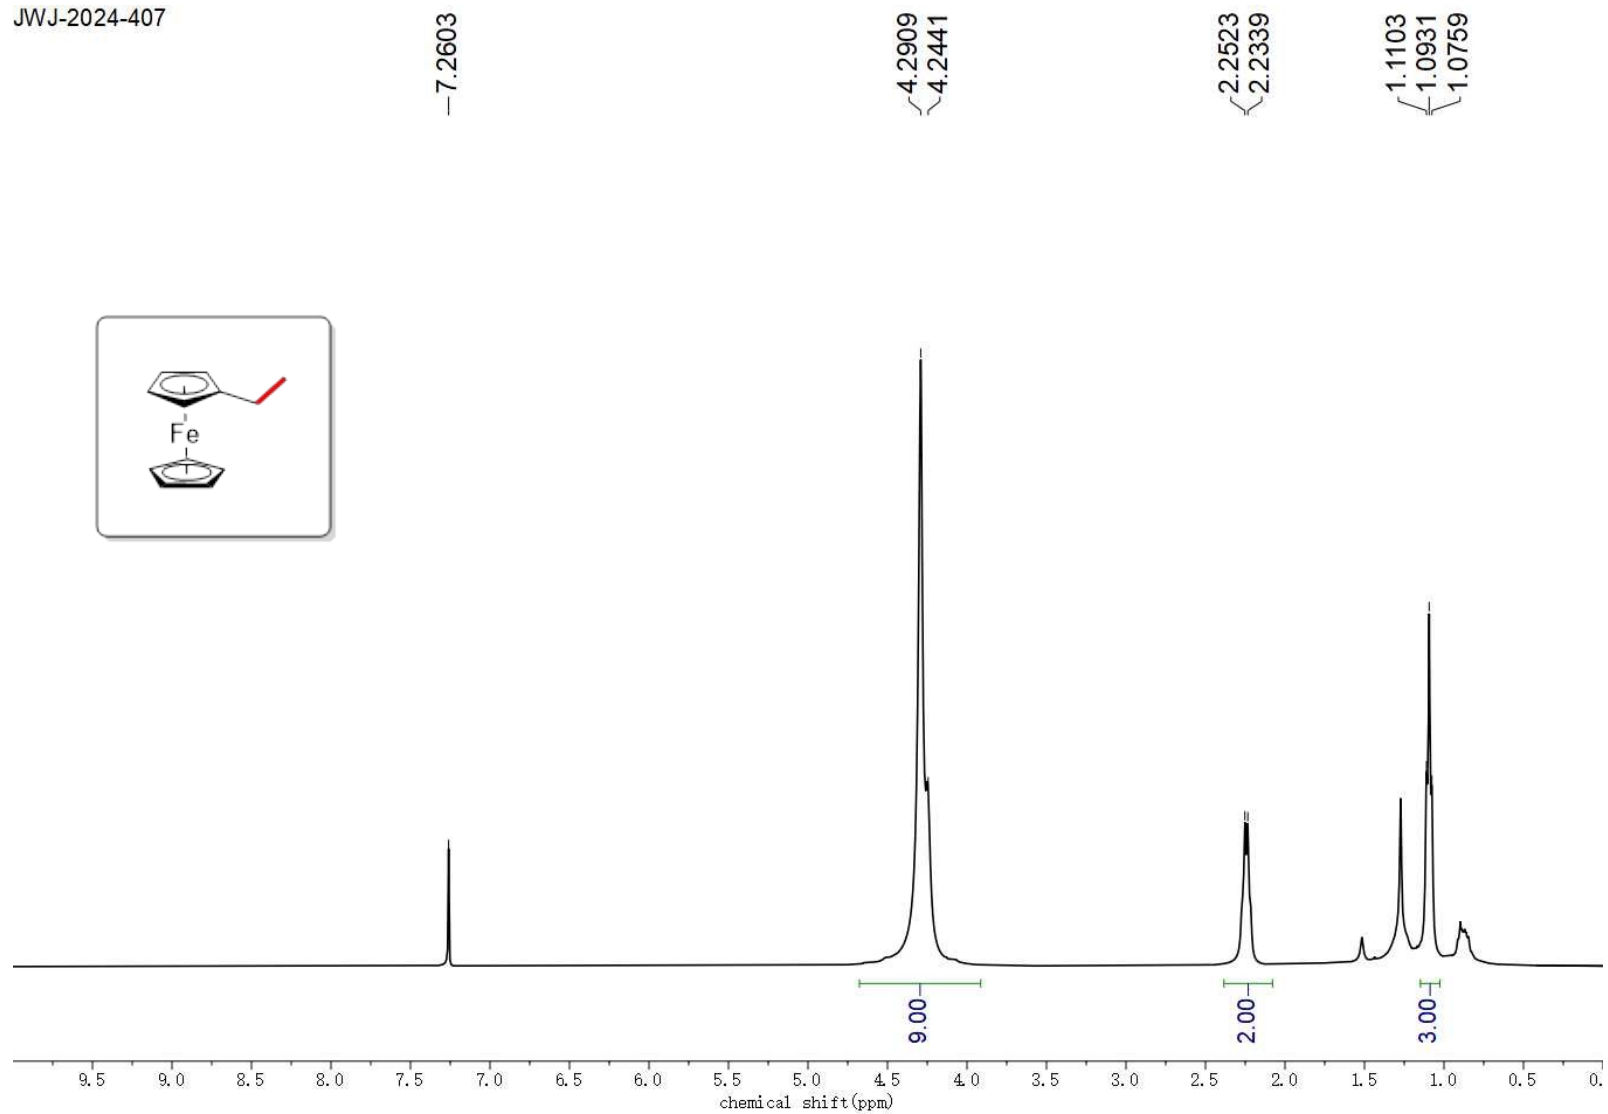

JWJ-2024-407

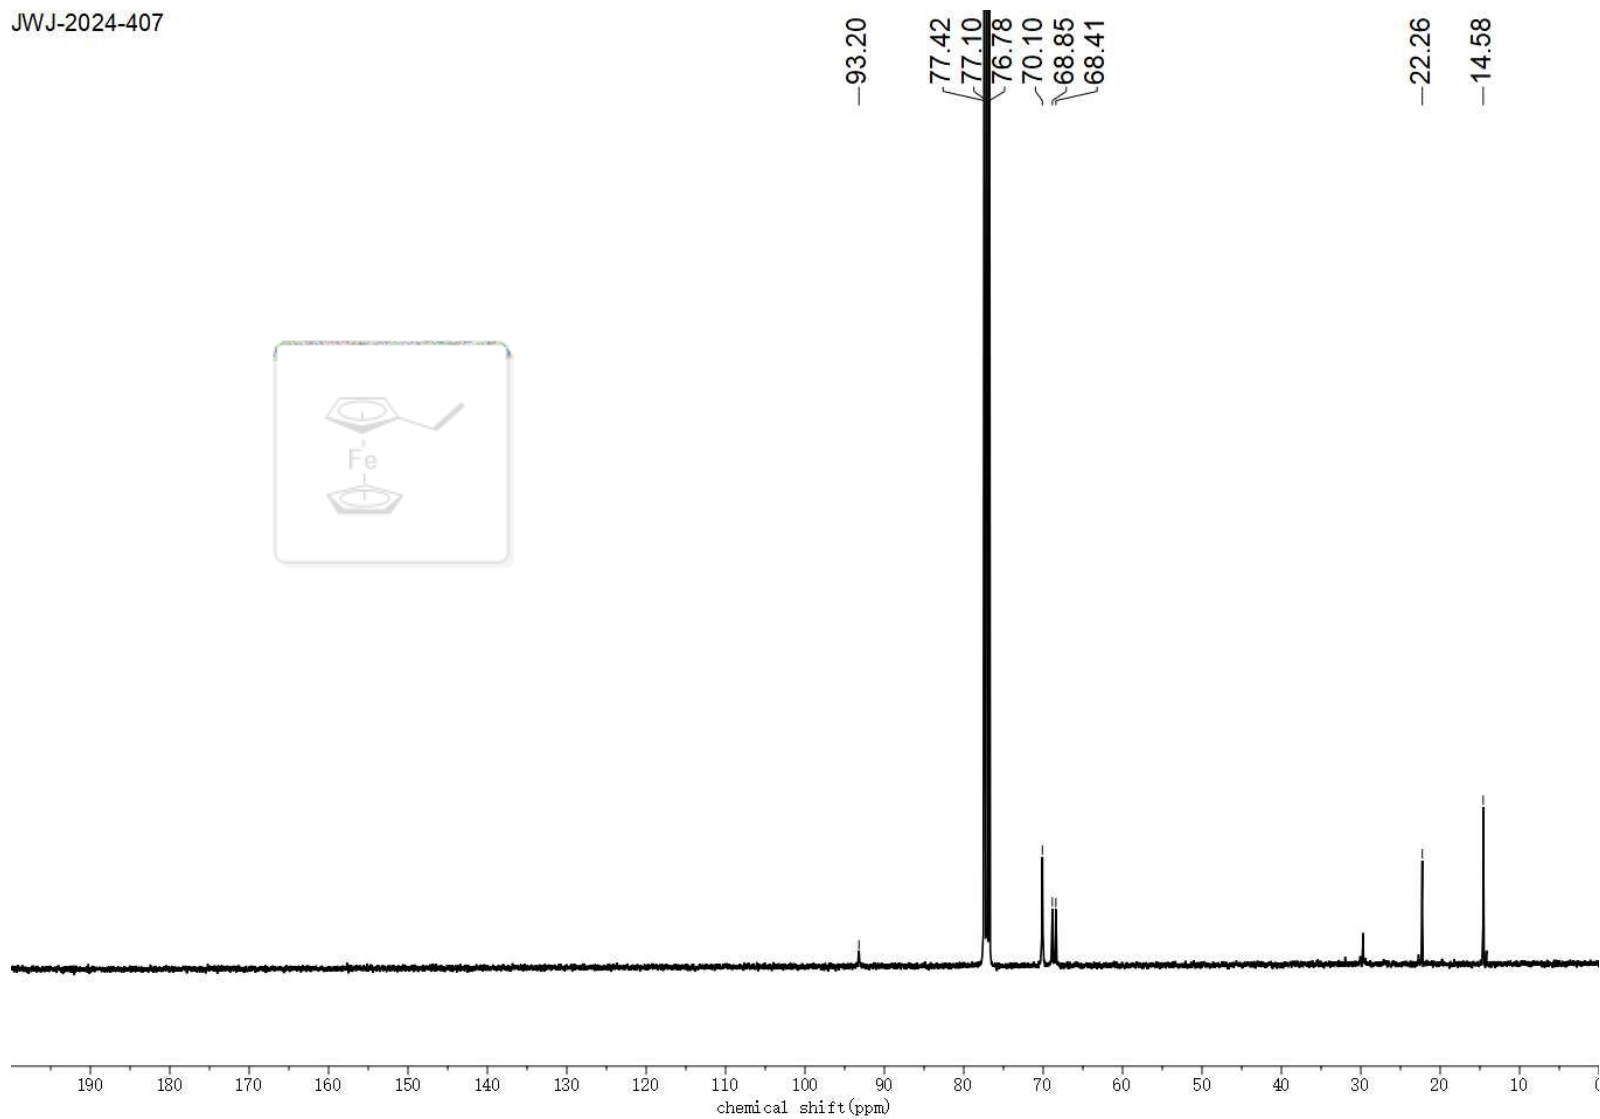

JWJ-2024-350

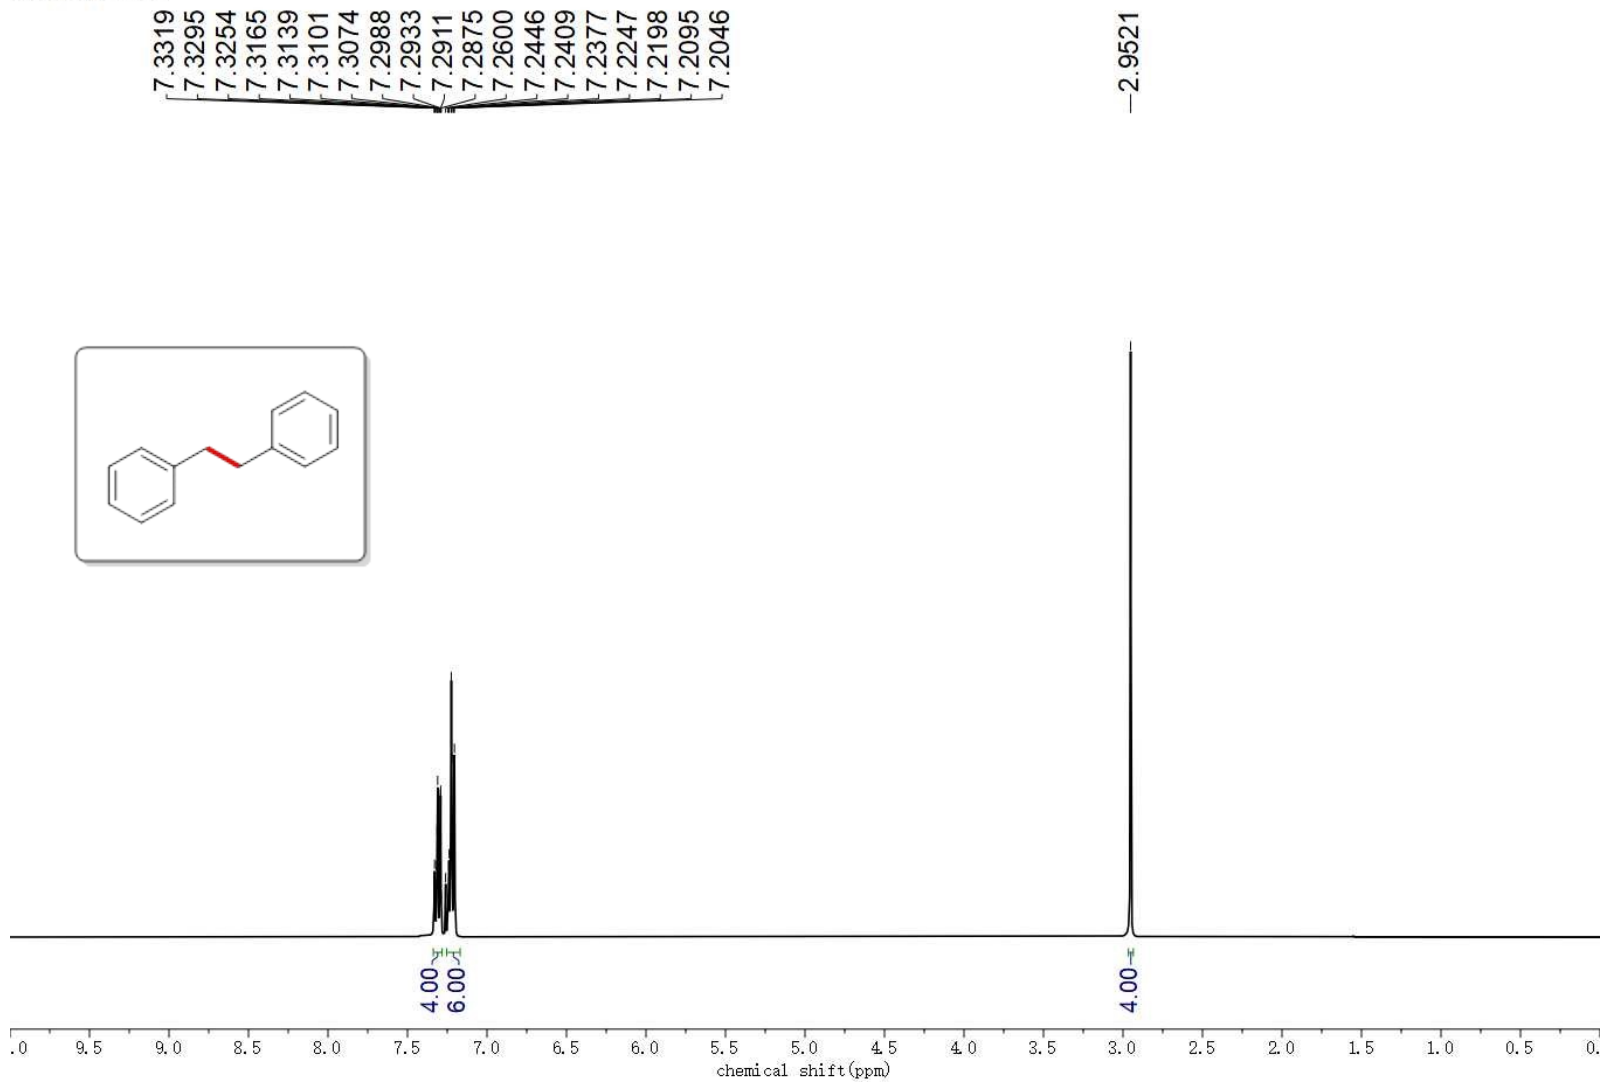

JWJ-2024-350

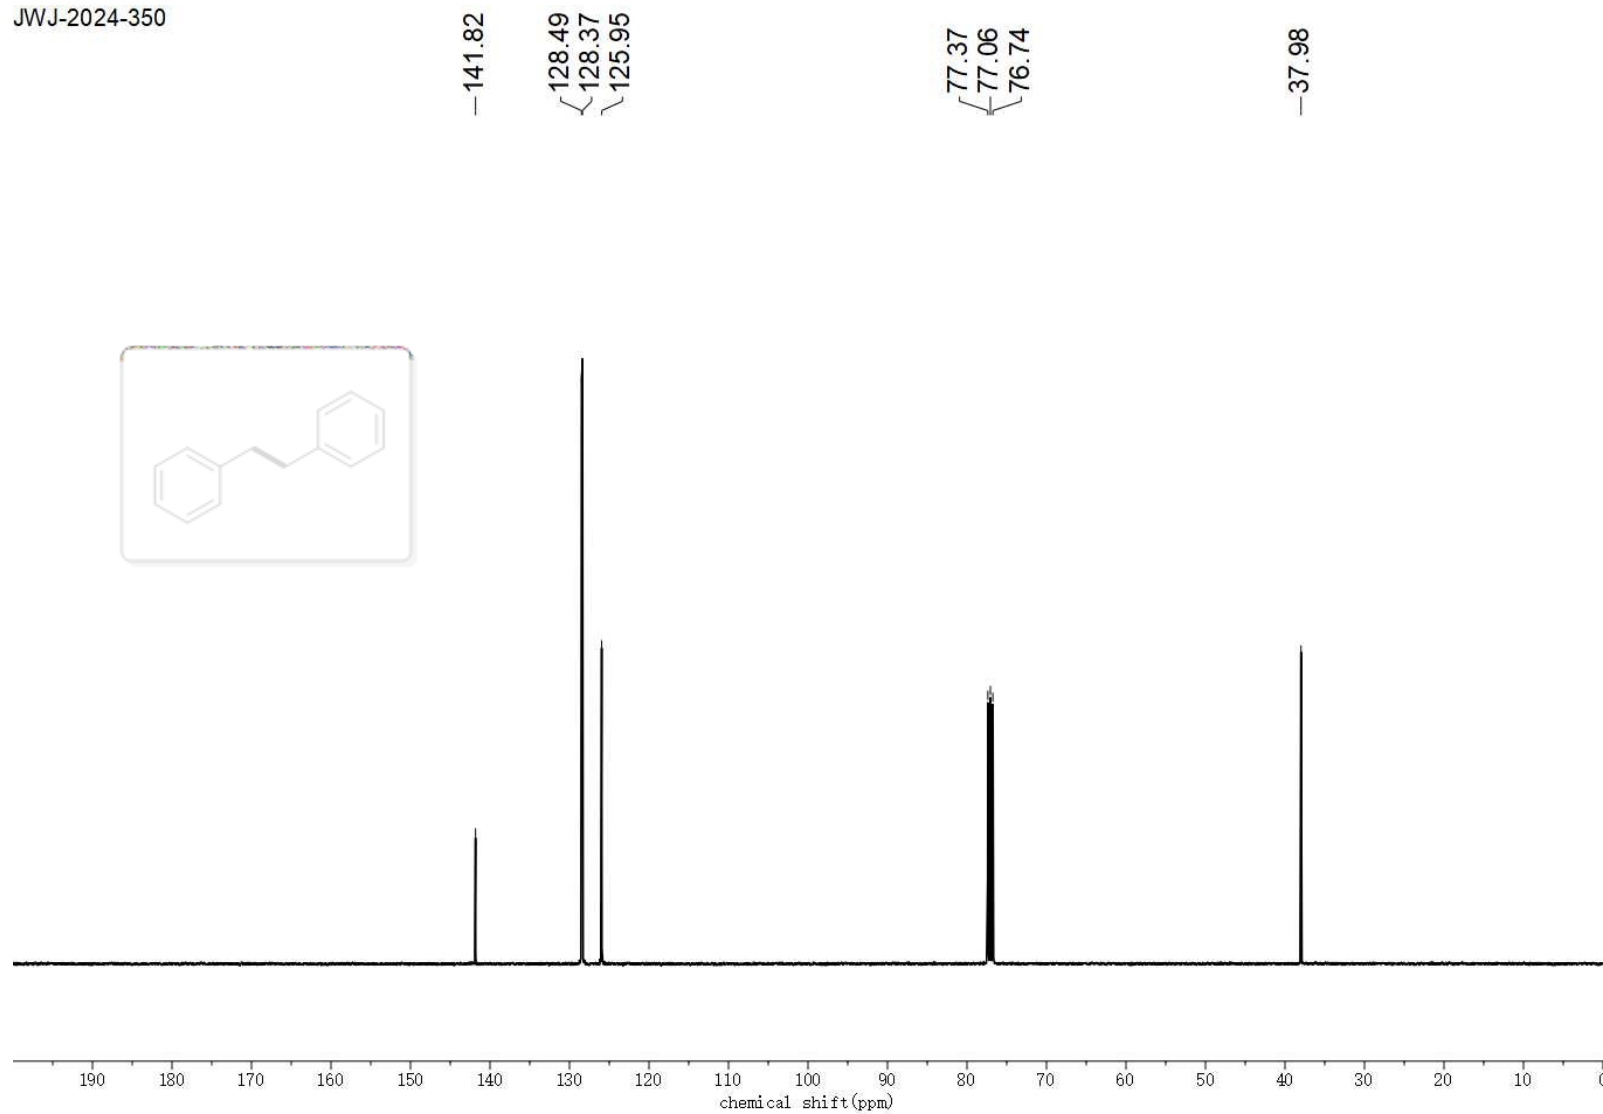

JWJ-2024-264

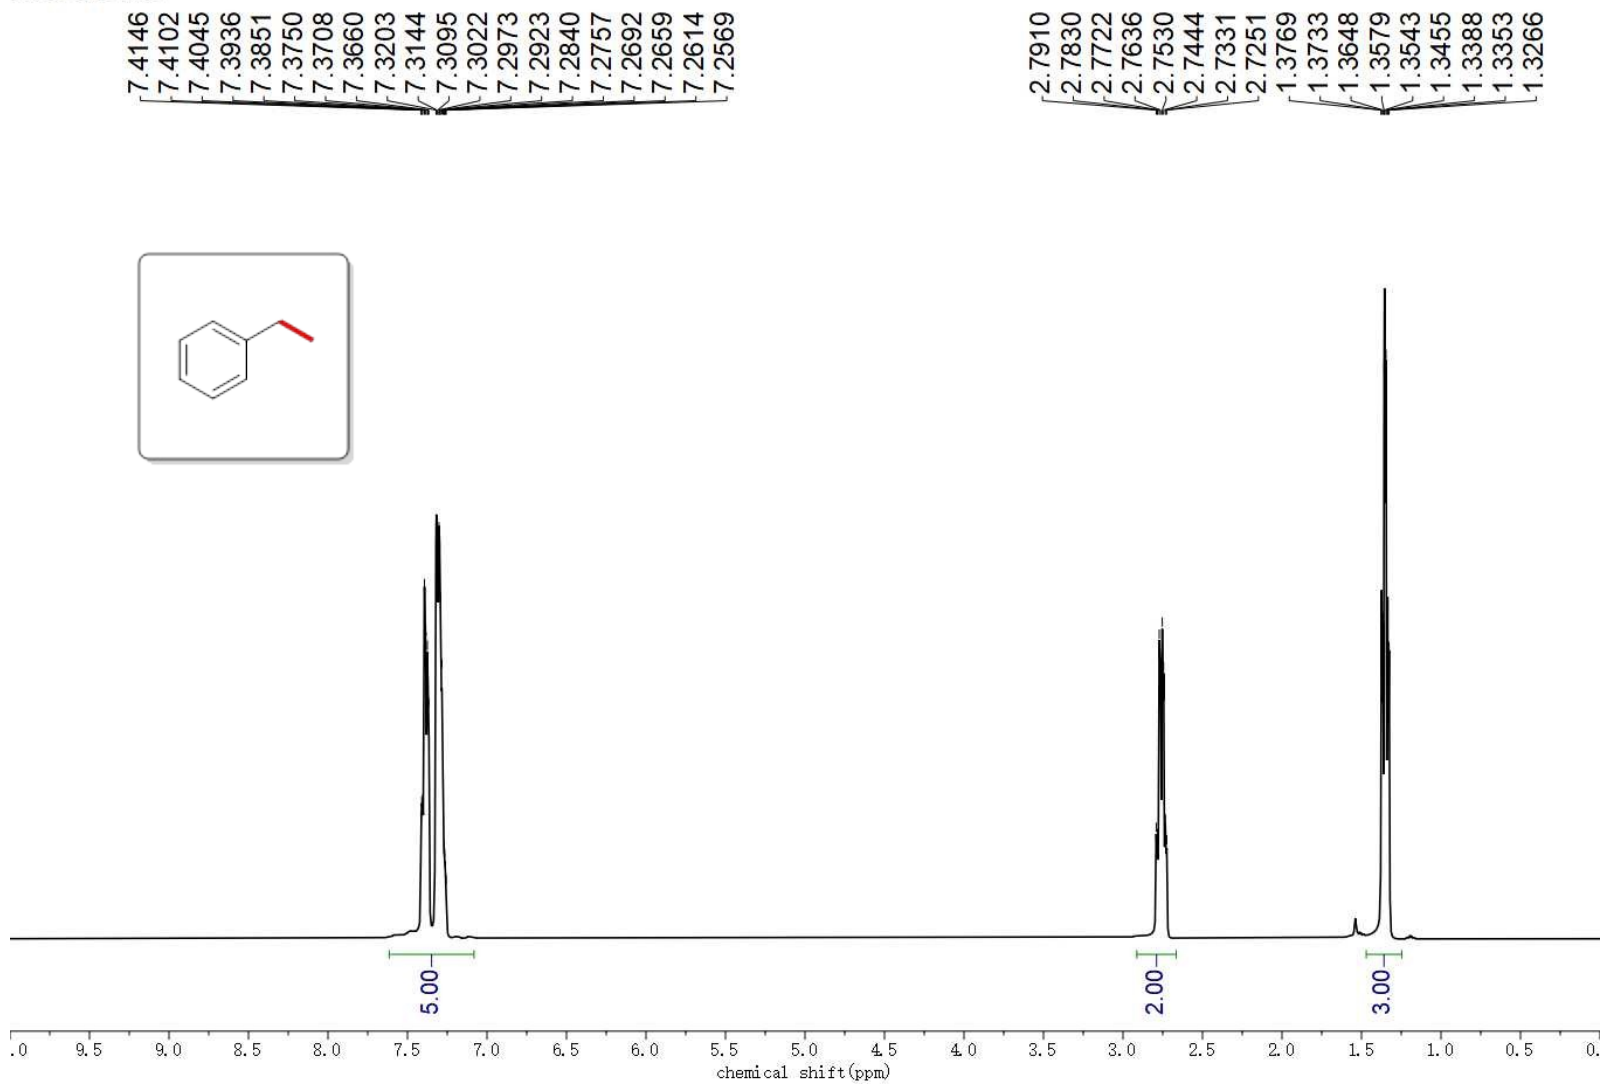

JWJ-2024-264

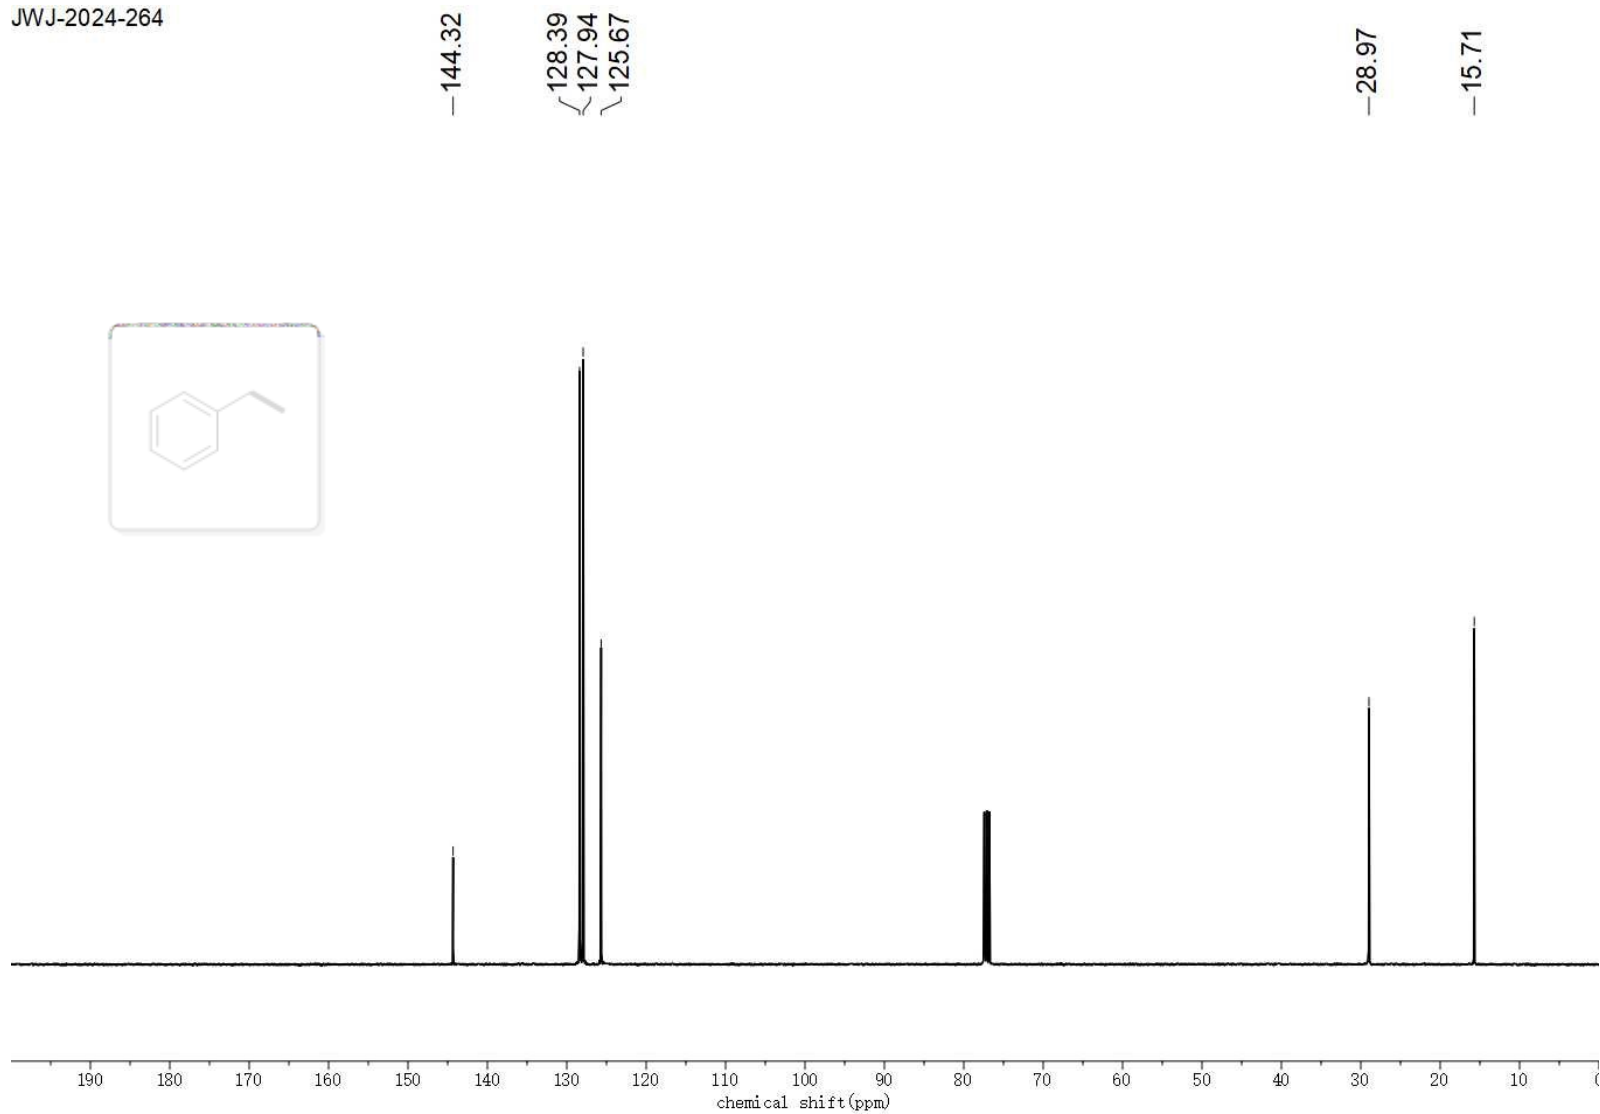

JWJ-2024-266

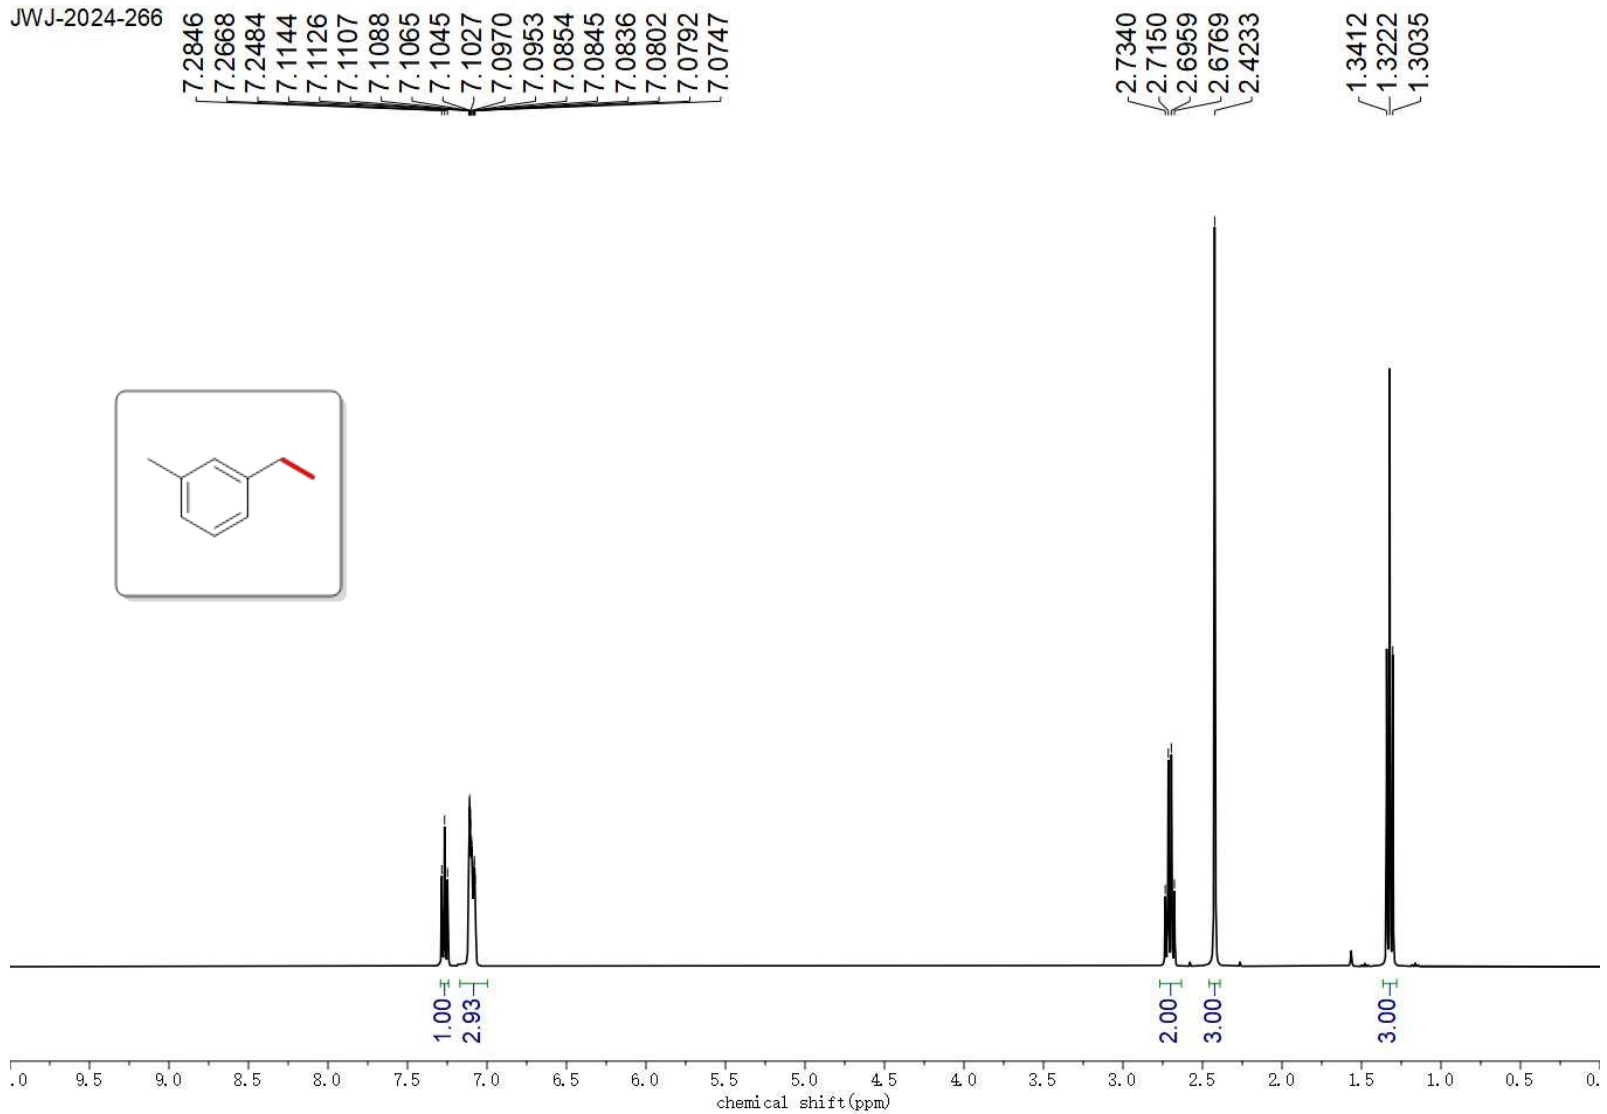

JWJ-2024-266

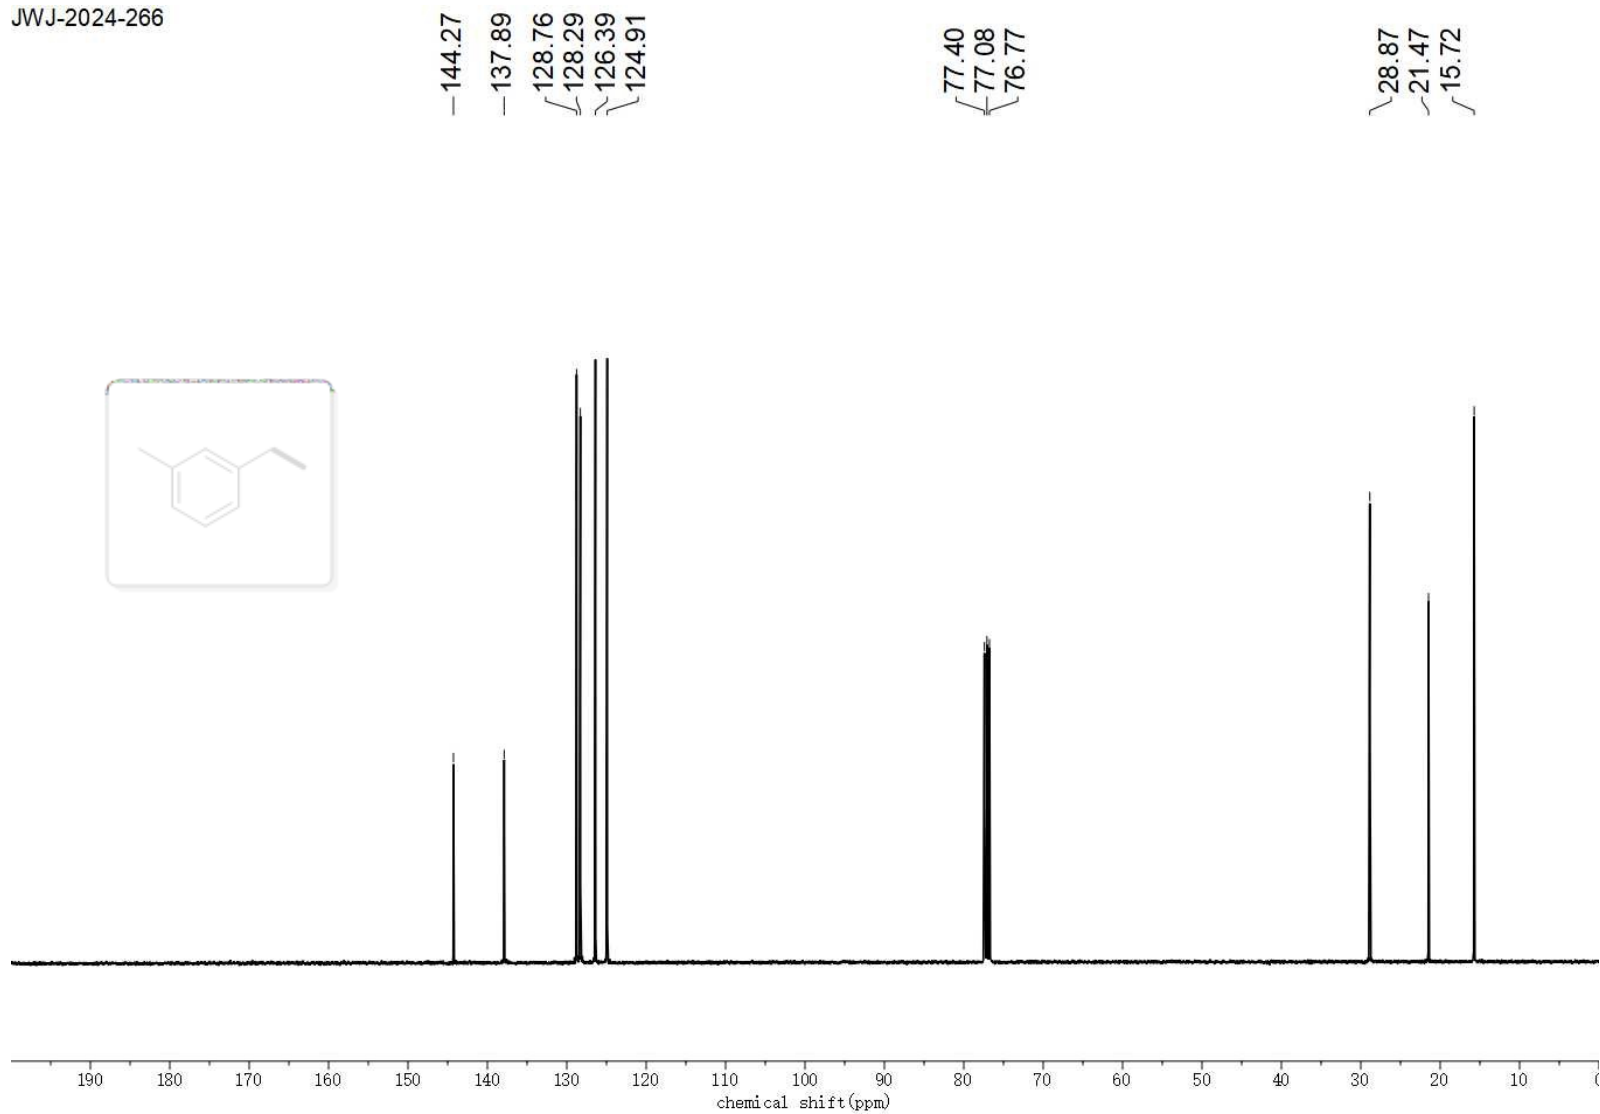



JWJ-2024-440

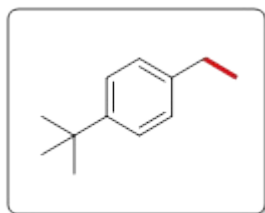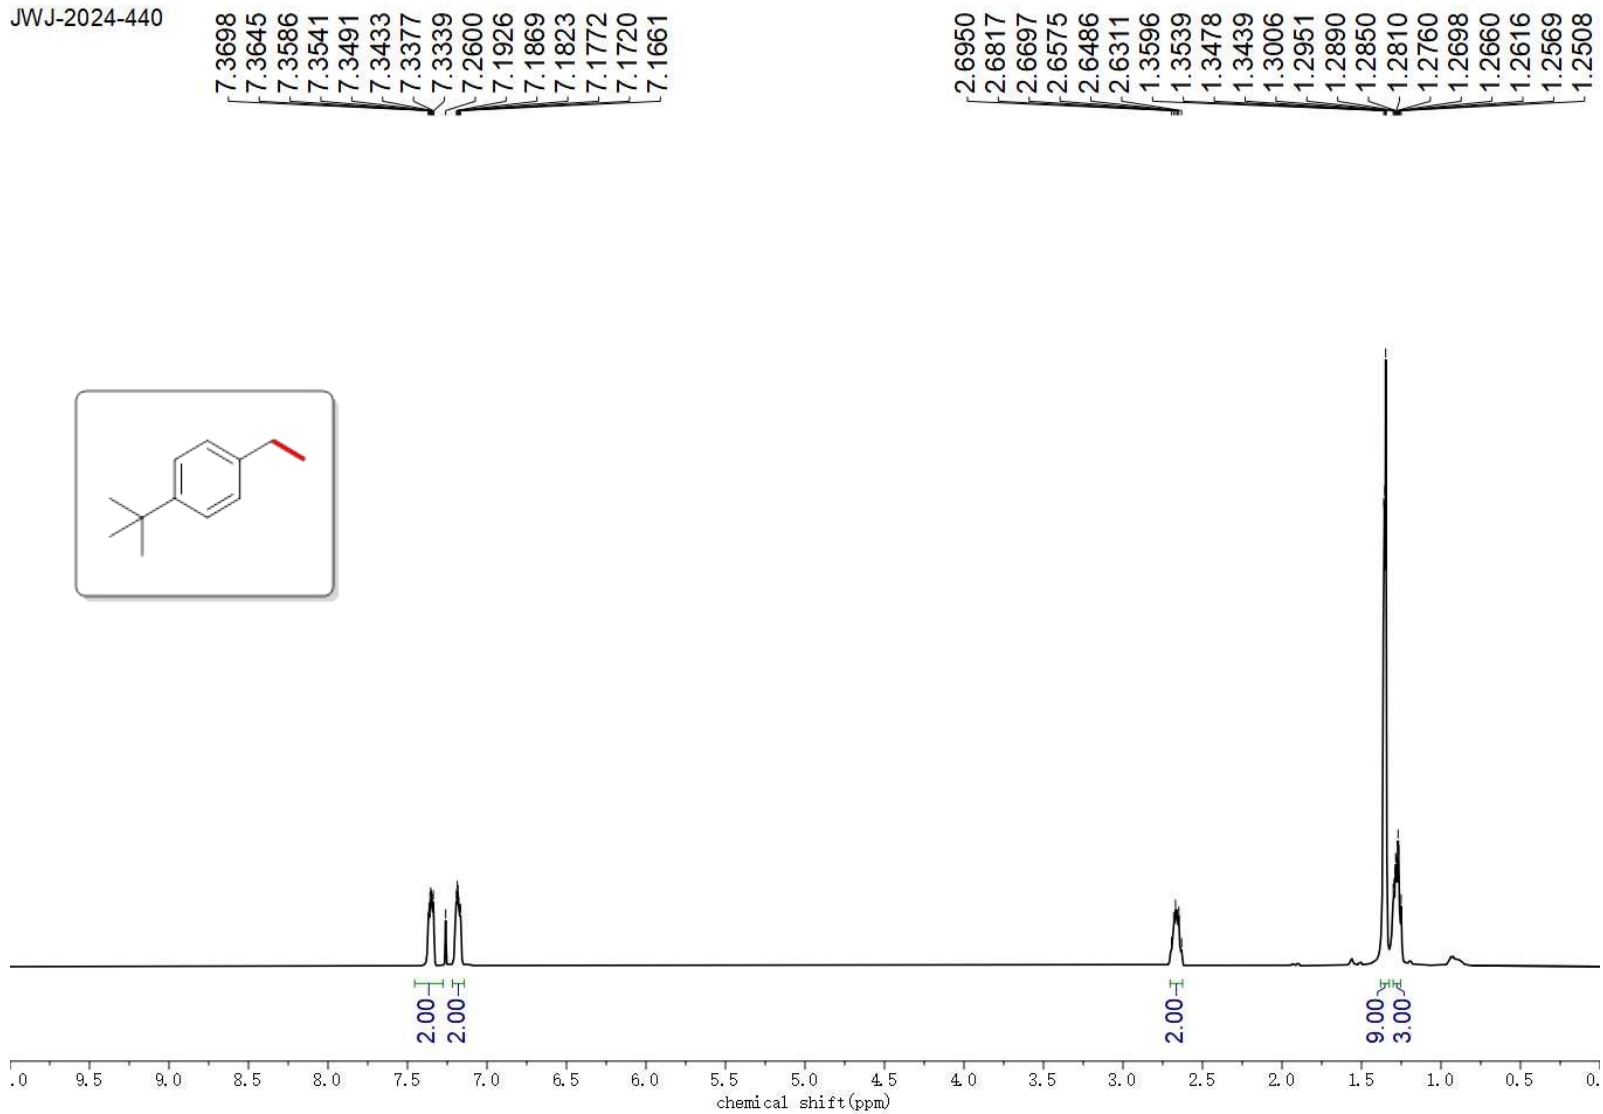

JWJ-2024-440

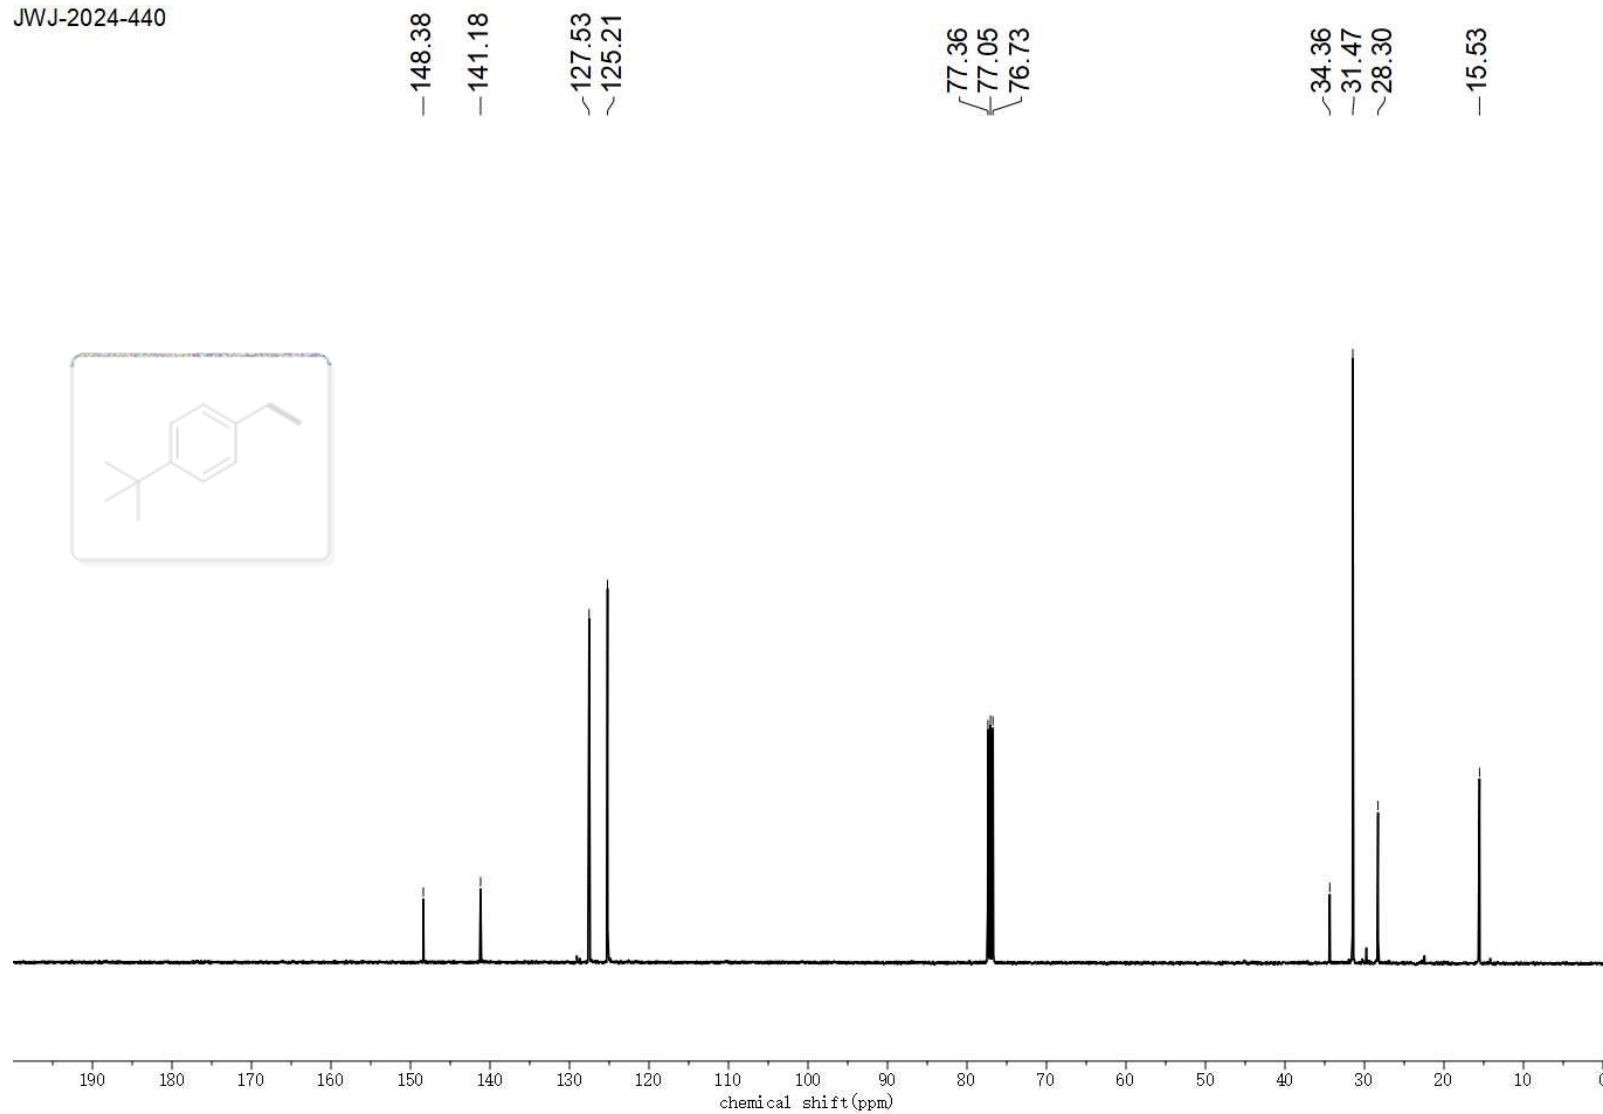

JWJ-2024-265

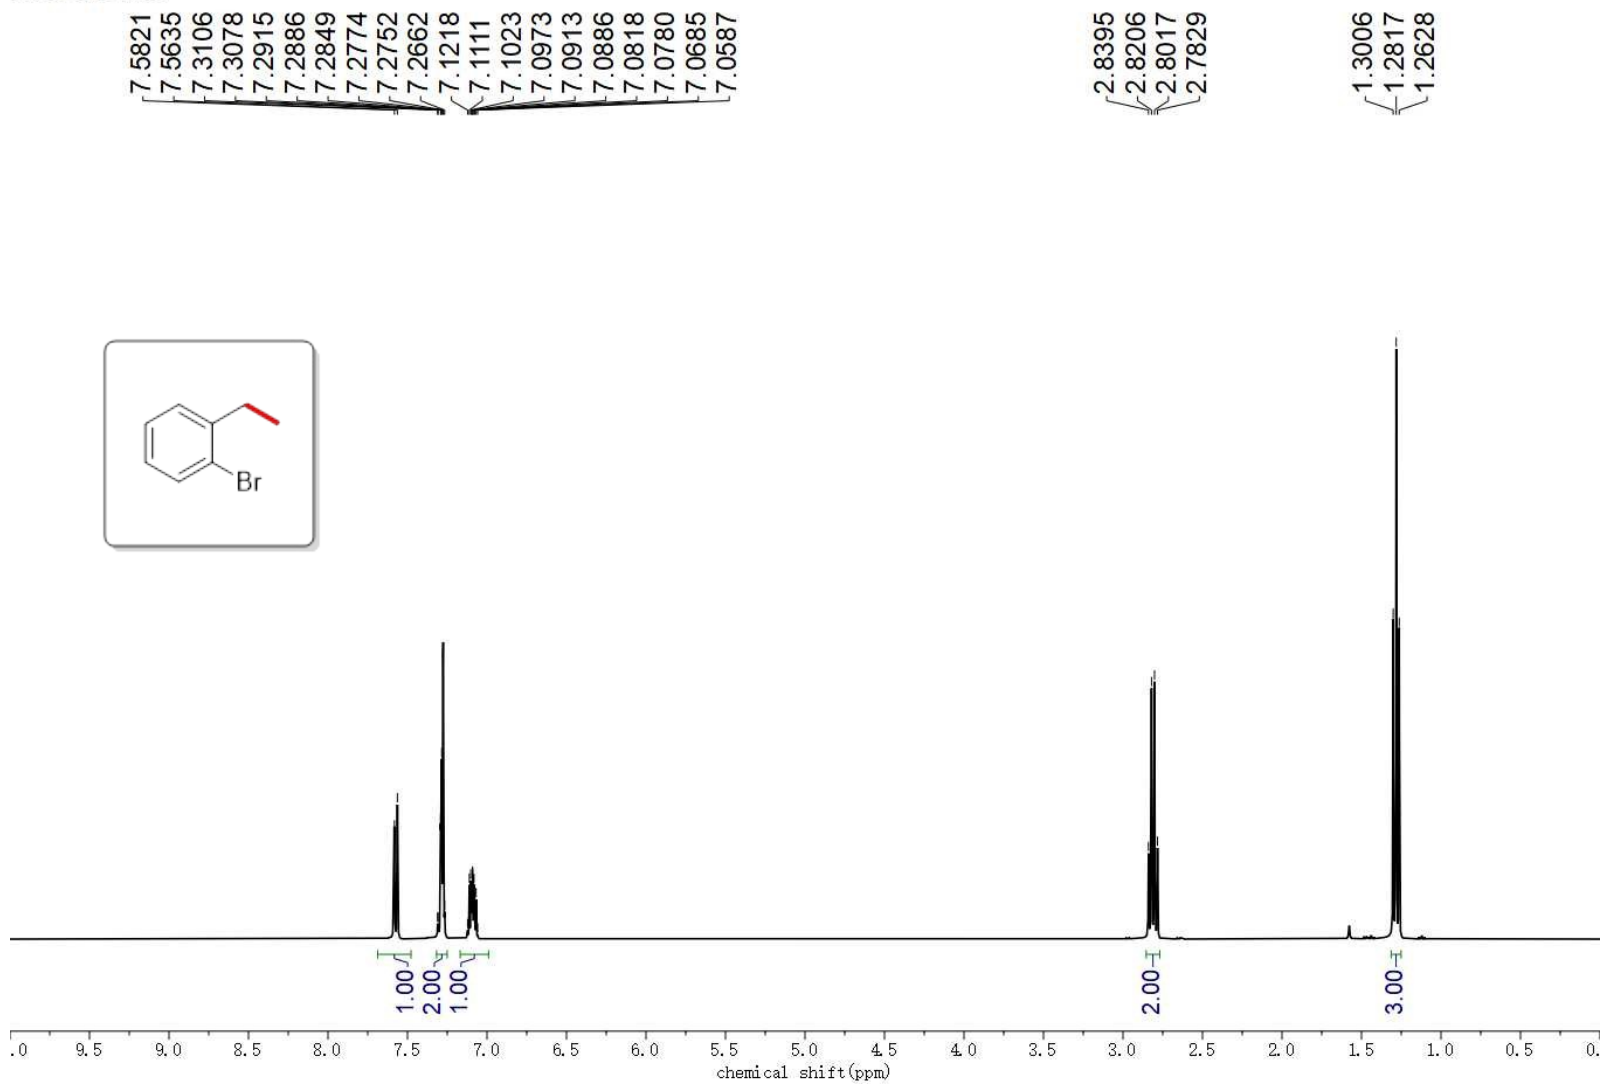

JWJ-2024-265

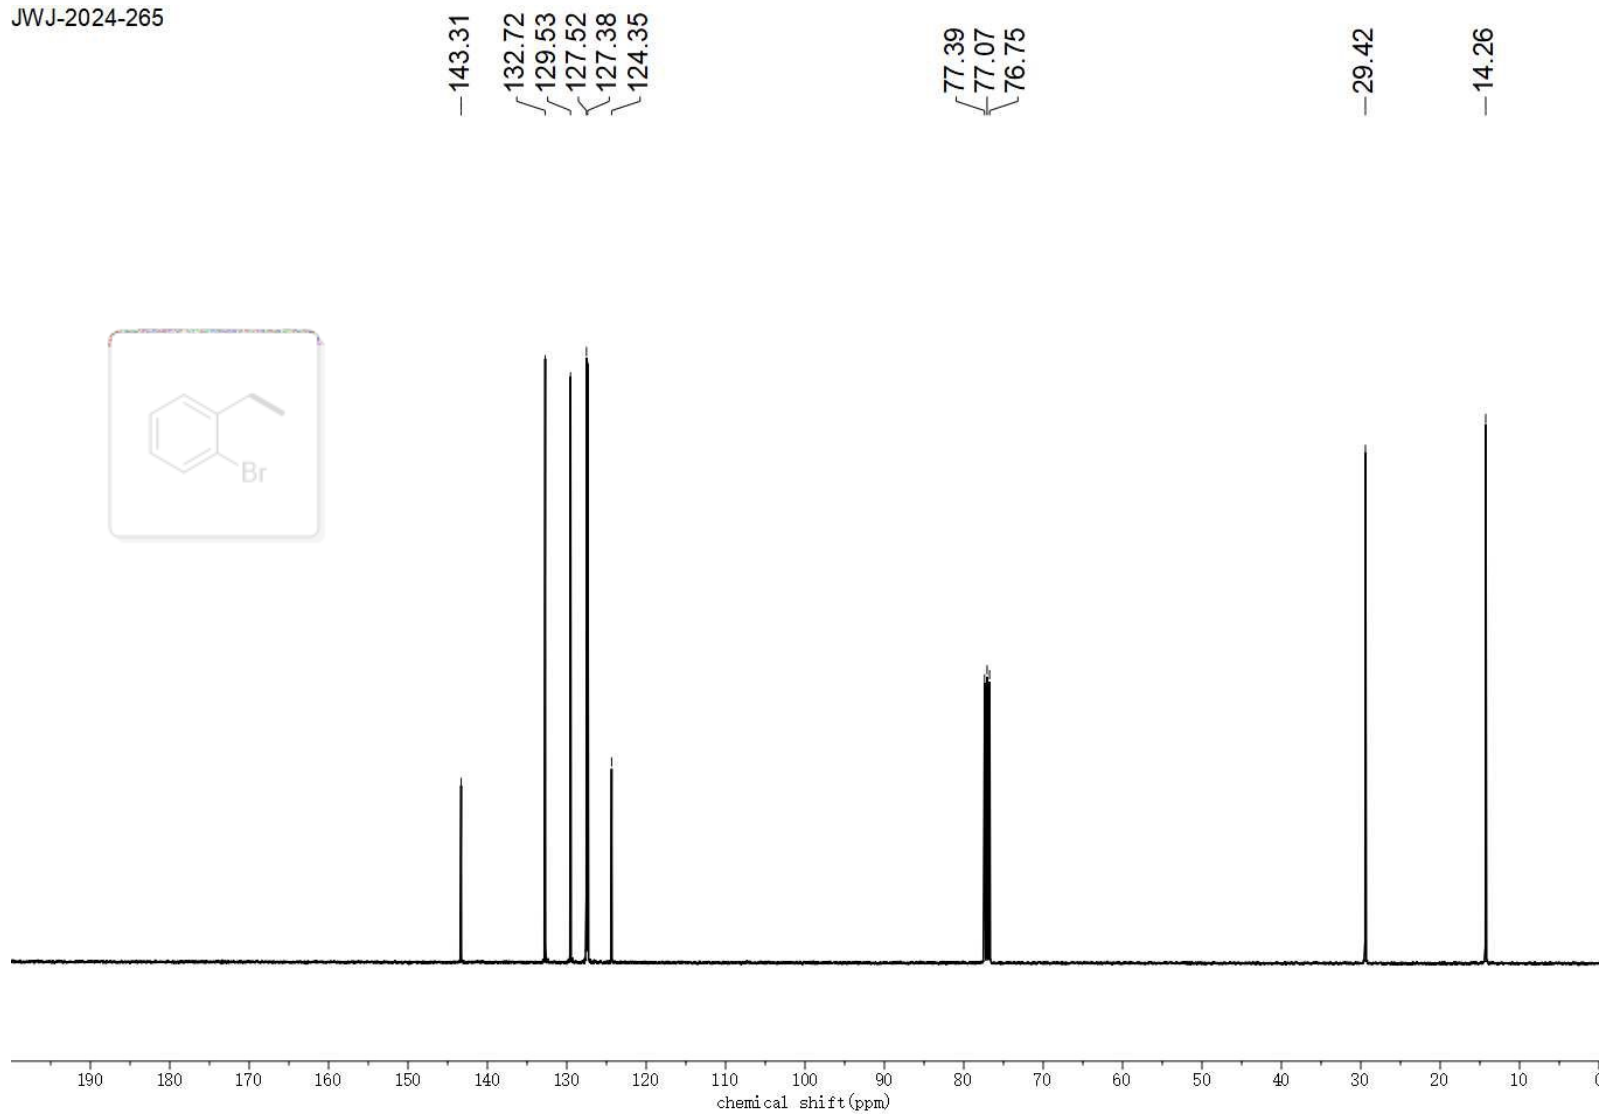

JWJ-2024-268

7.6109  
7.5936  
7.5508  
7.5303  
7.4623  
7.4438  
7.4240  
7.3582  
7.3398  
7.3215  
7.3065  
7.2862  
7.2599

2.7448  
2.7258  
2.7068  
2.6878

1.3183  
1.2992  
1.2801

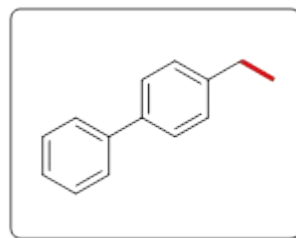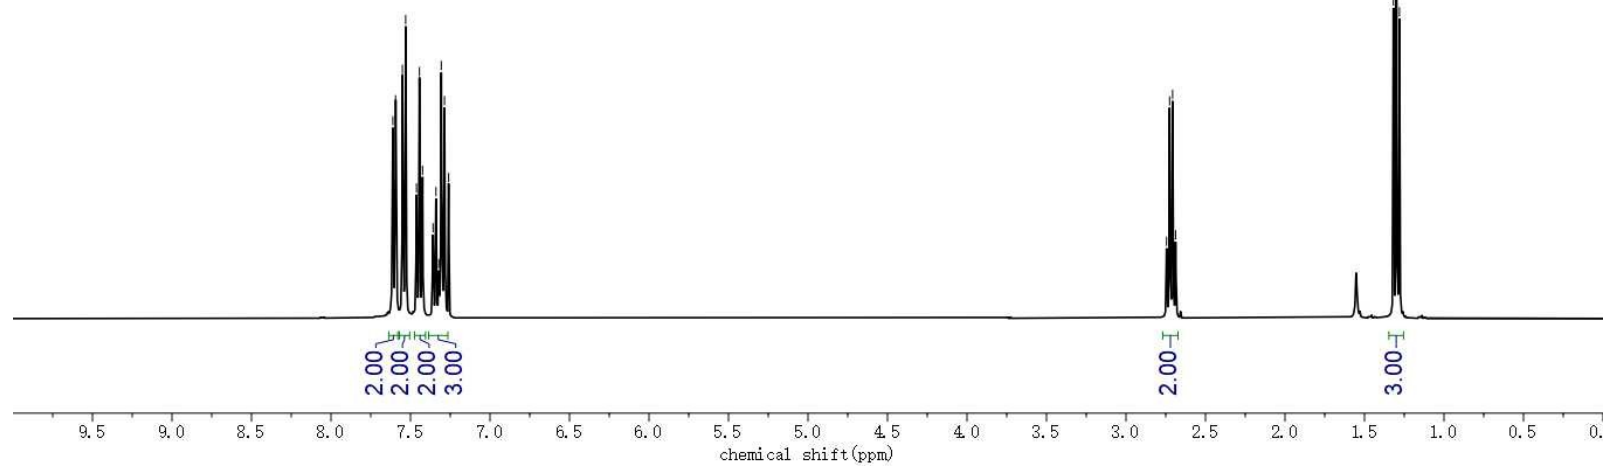

JWJ-2024-268

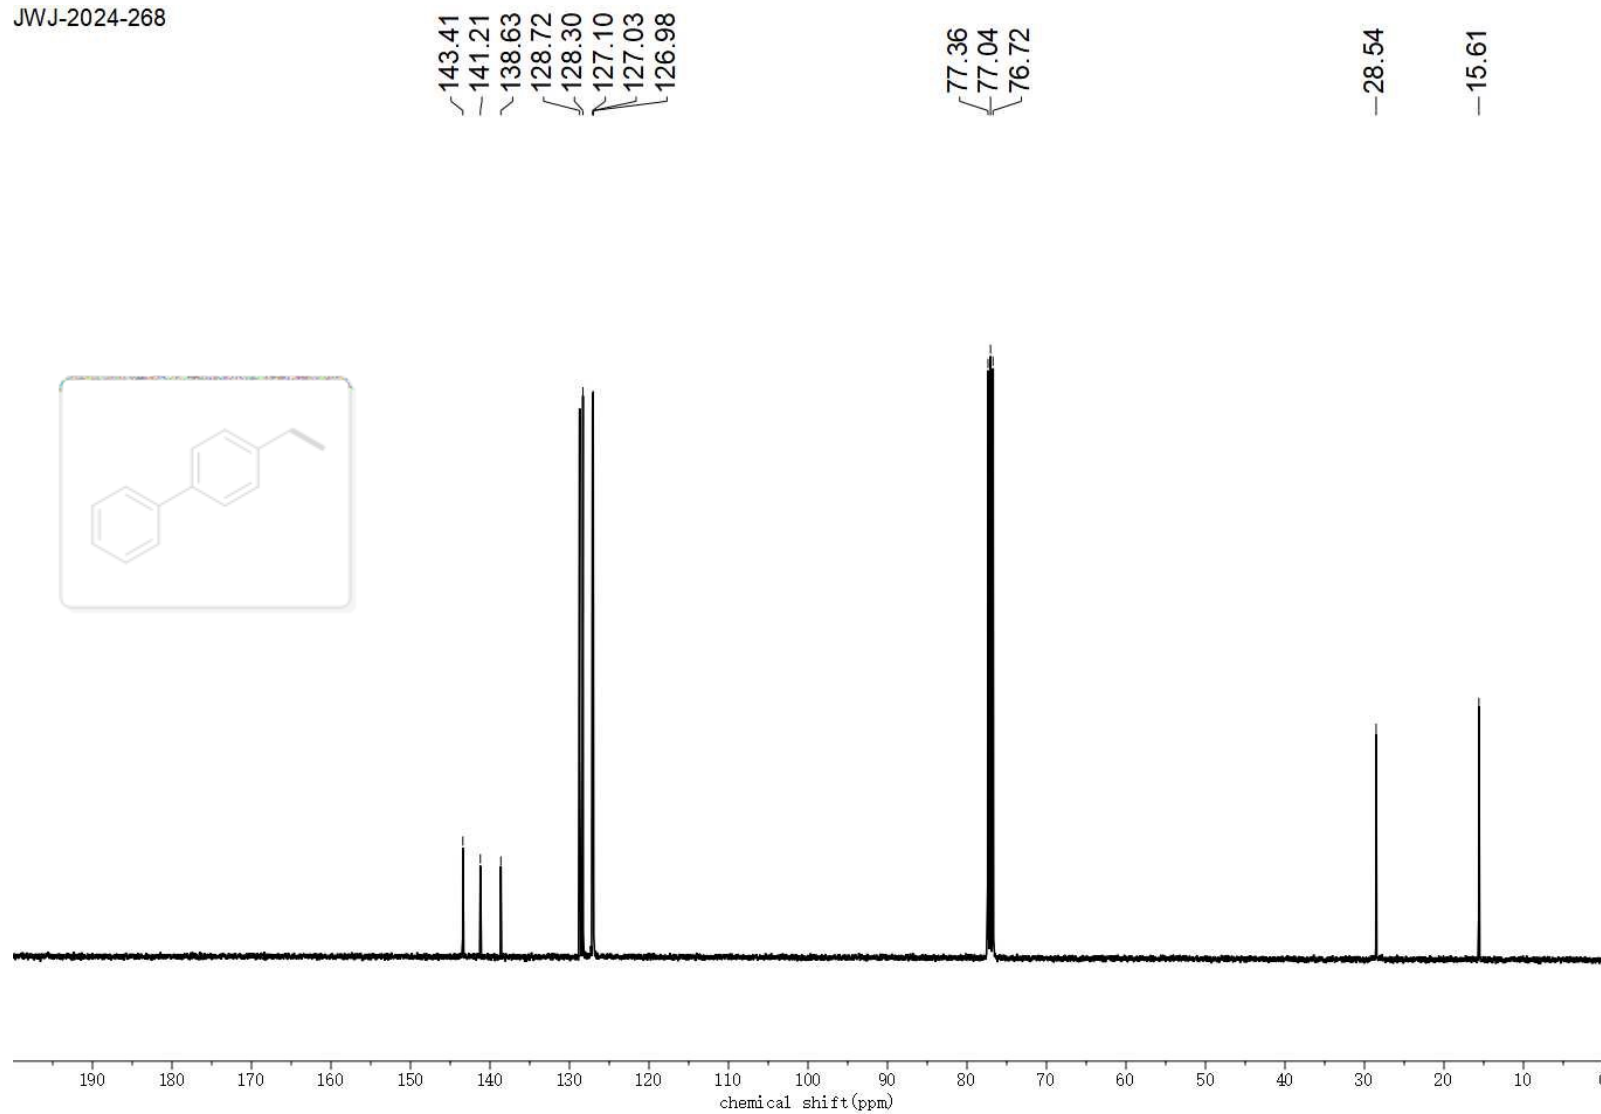

JWJ-2024-271

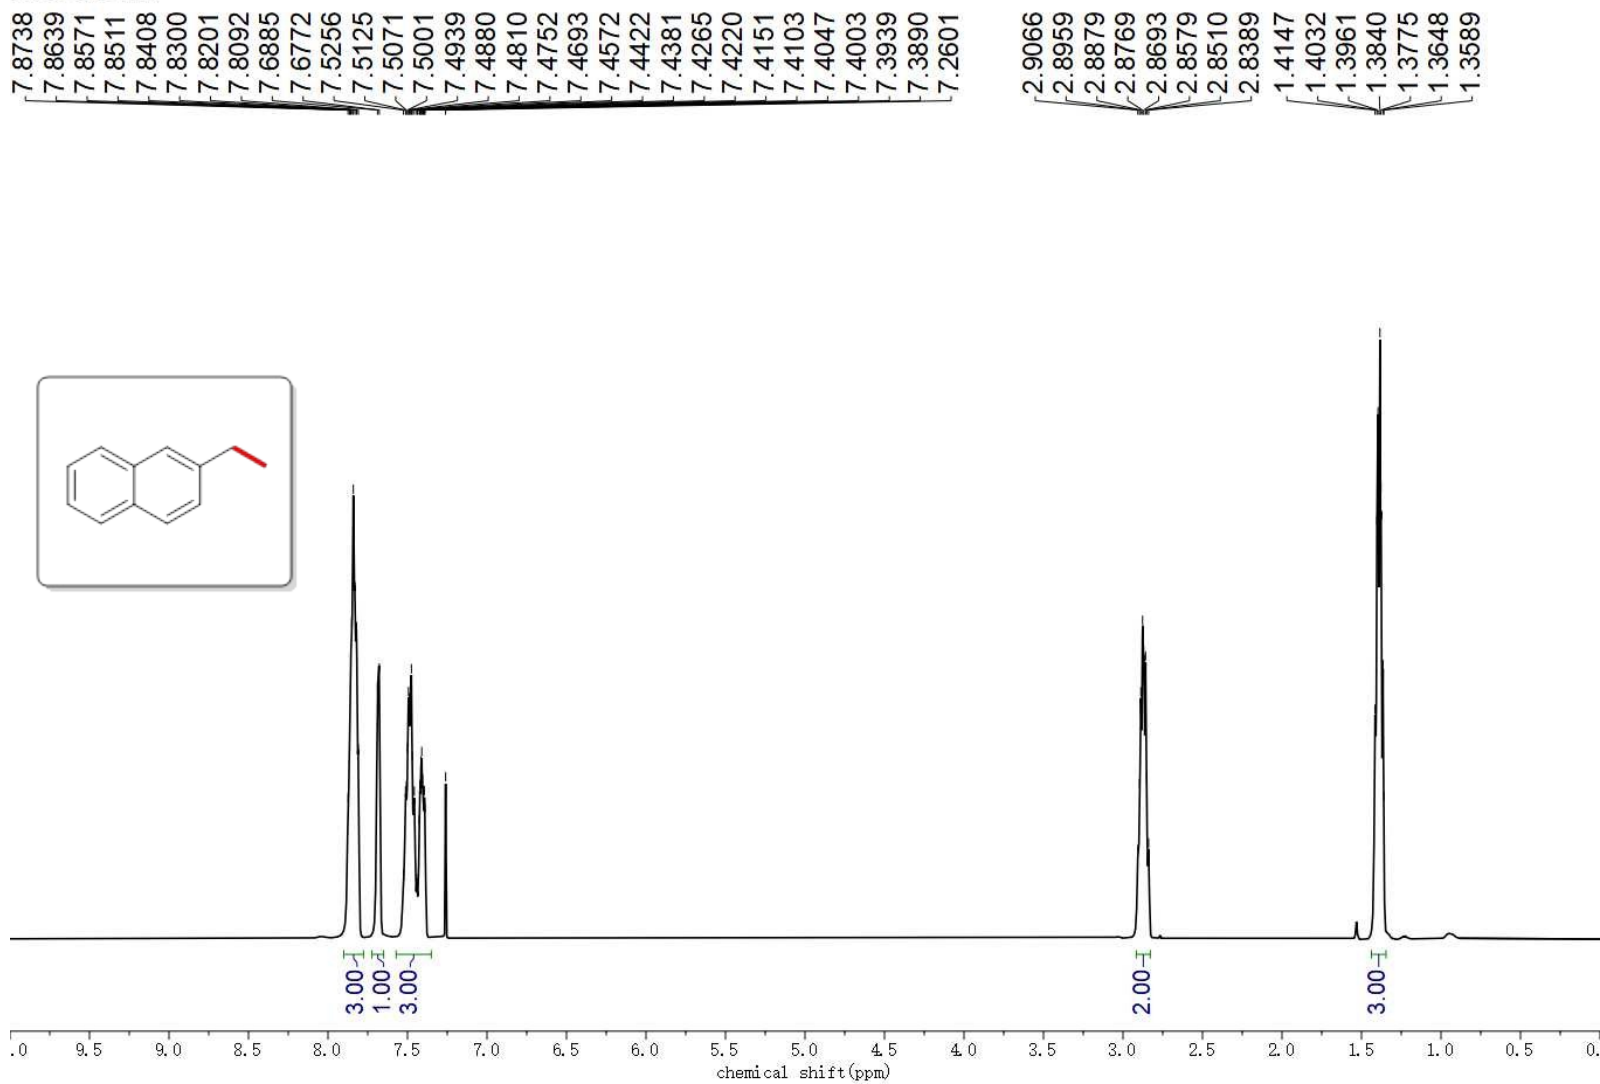

JWJ-2024-271

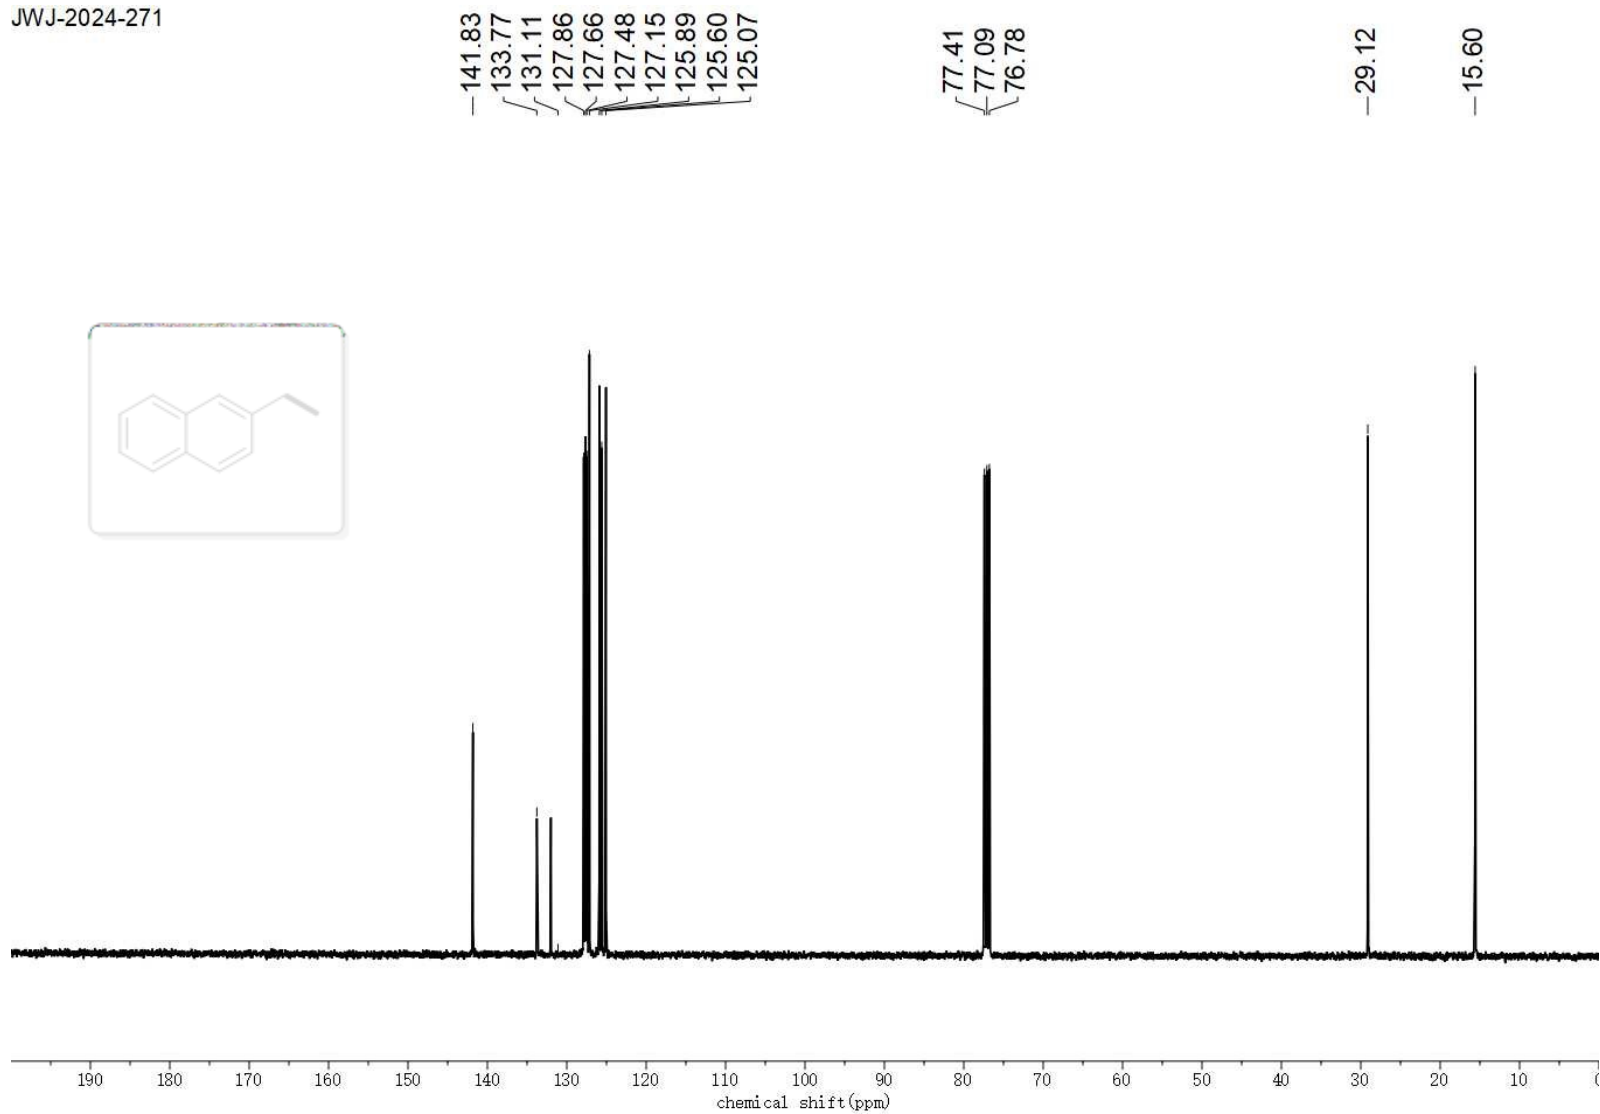



JWJ-2024-272

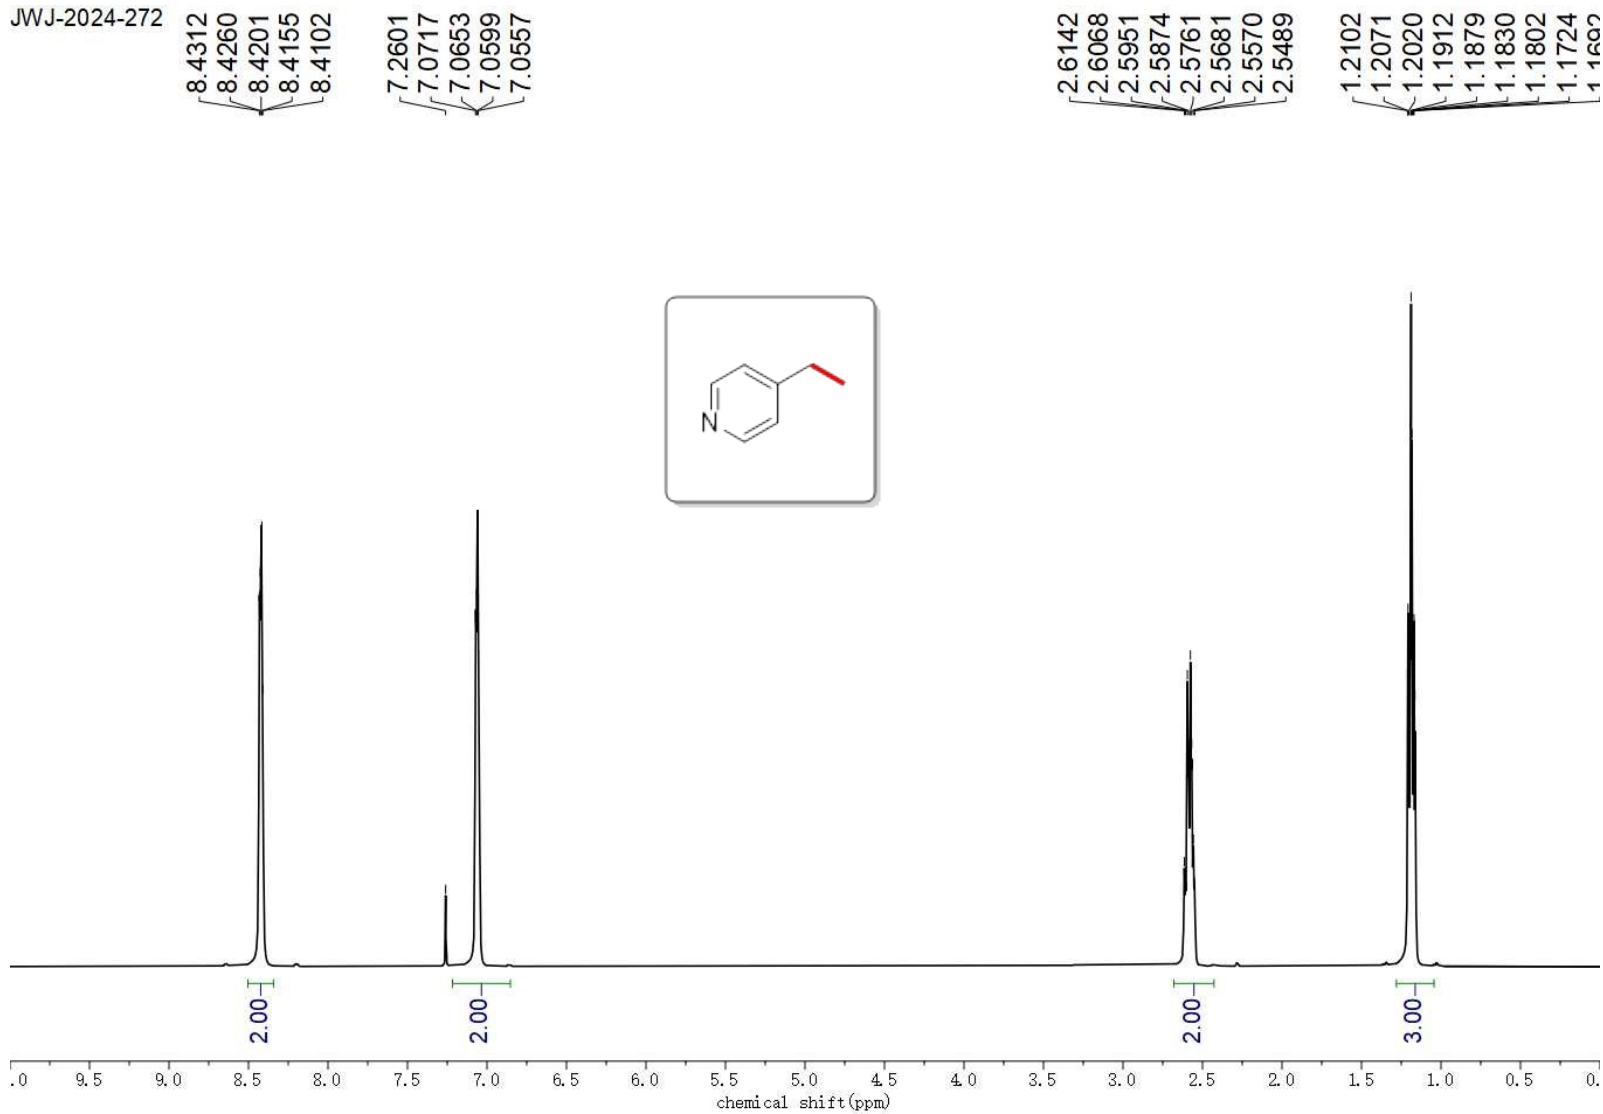

JWJ-2024-272

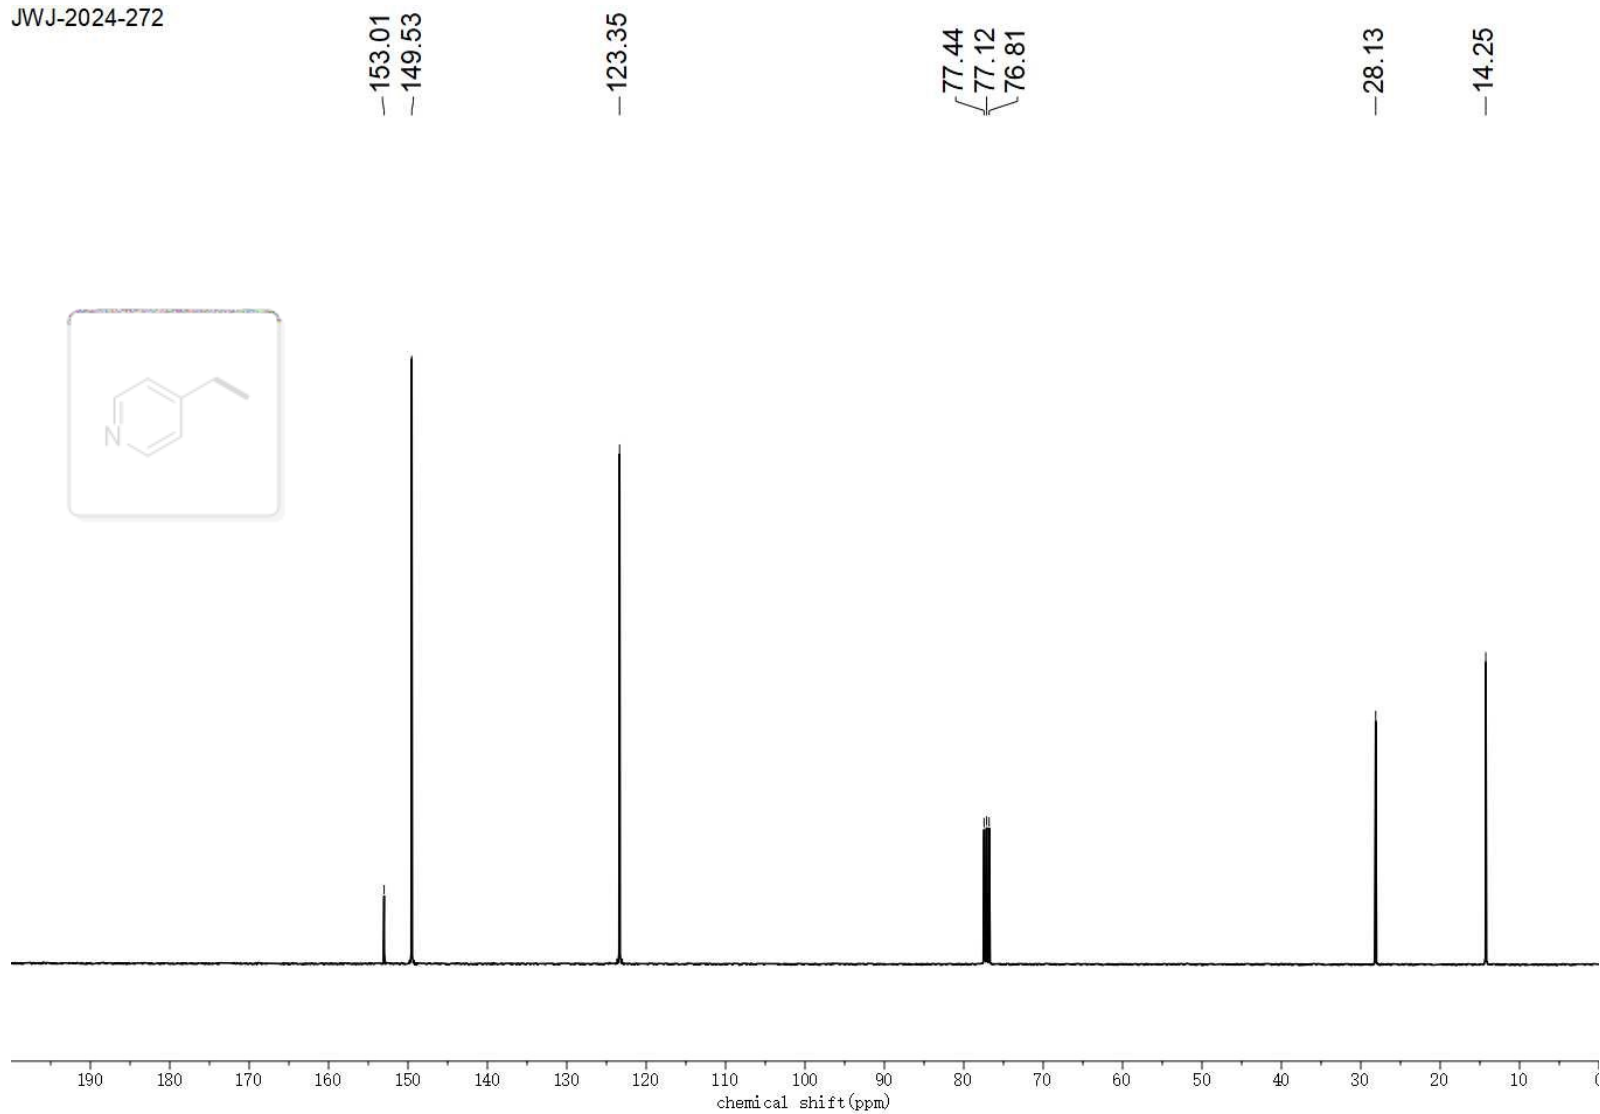

JWJ-2024-269

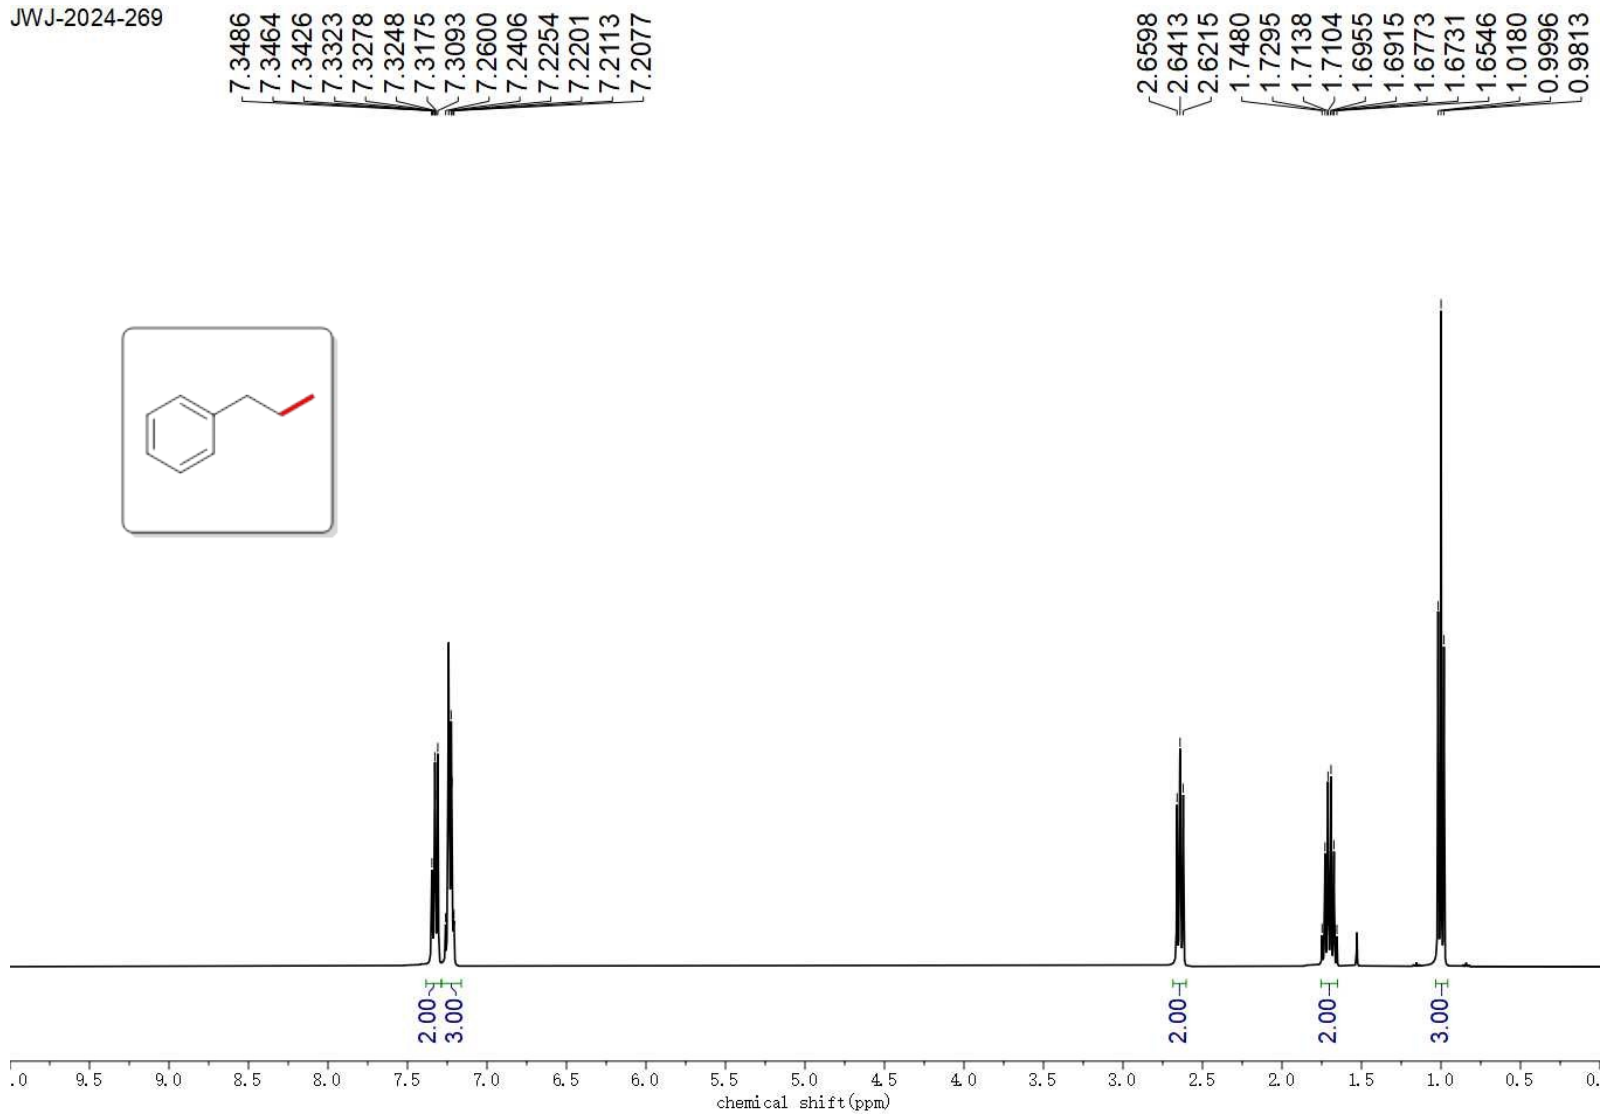

JWJ-2024-269

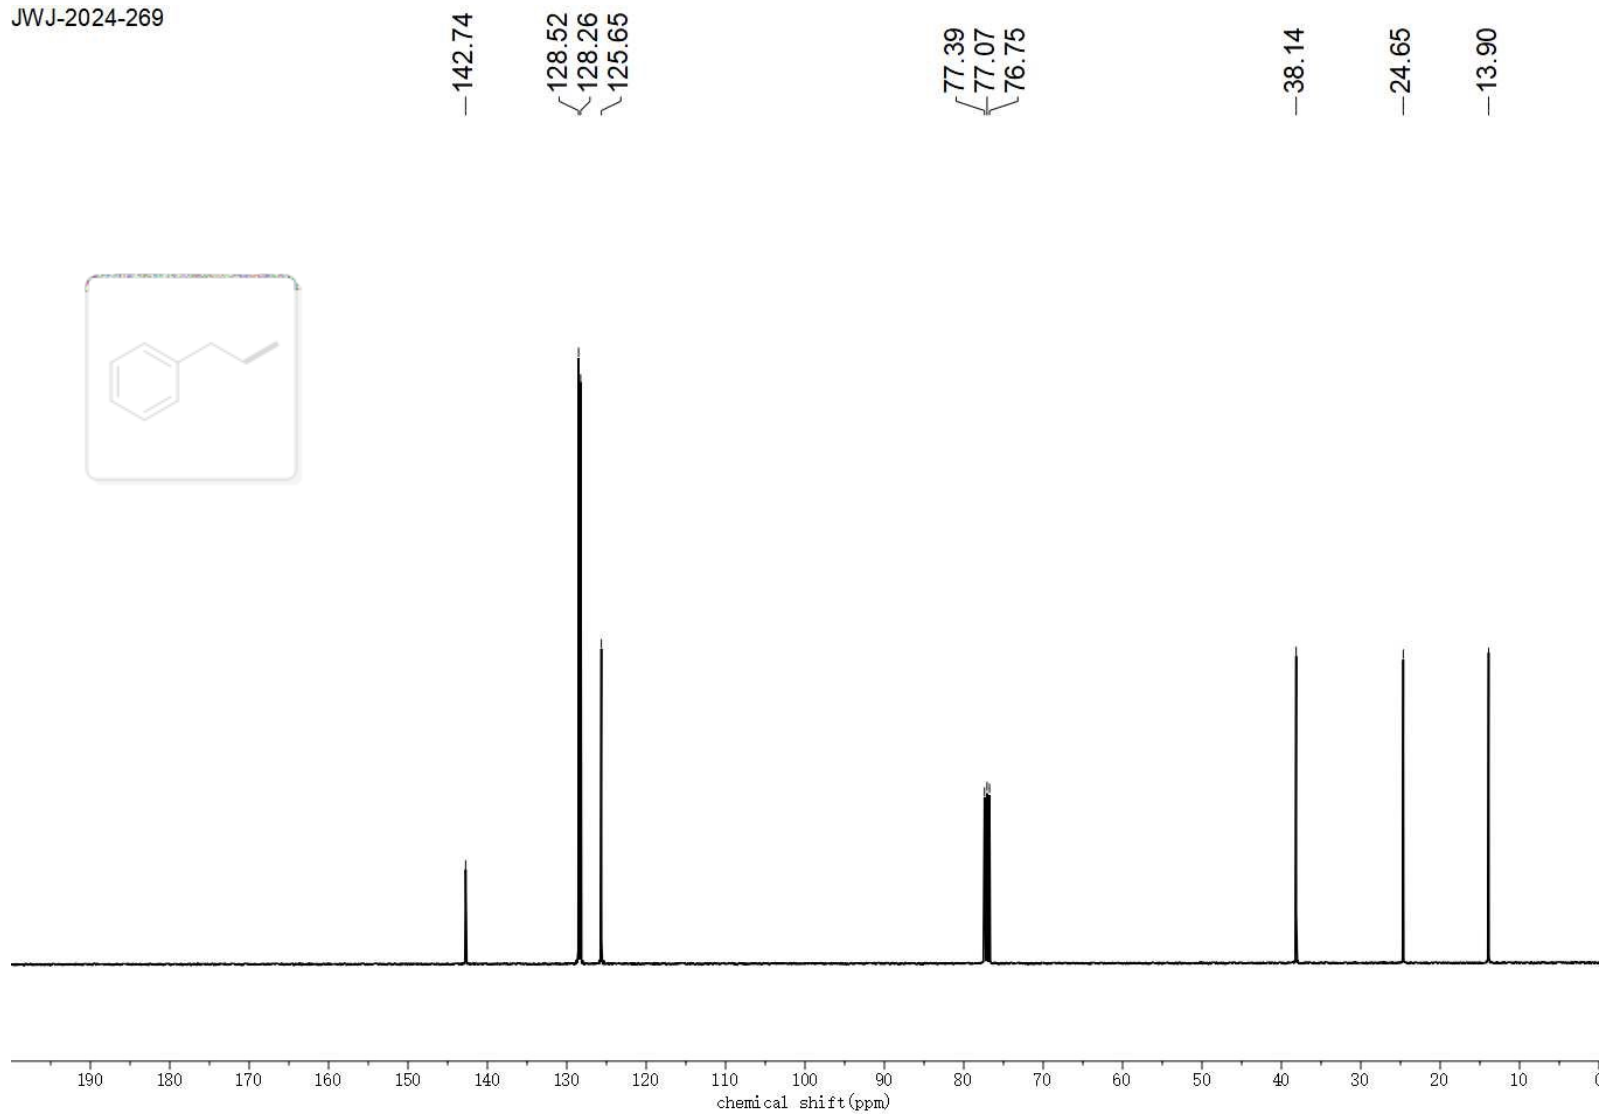

JWJ-2024-273

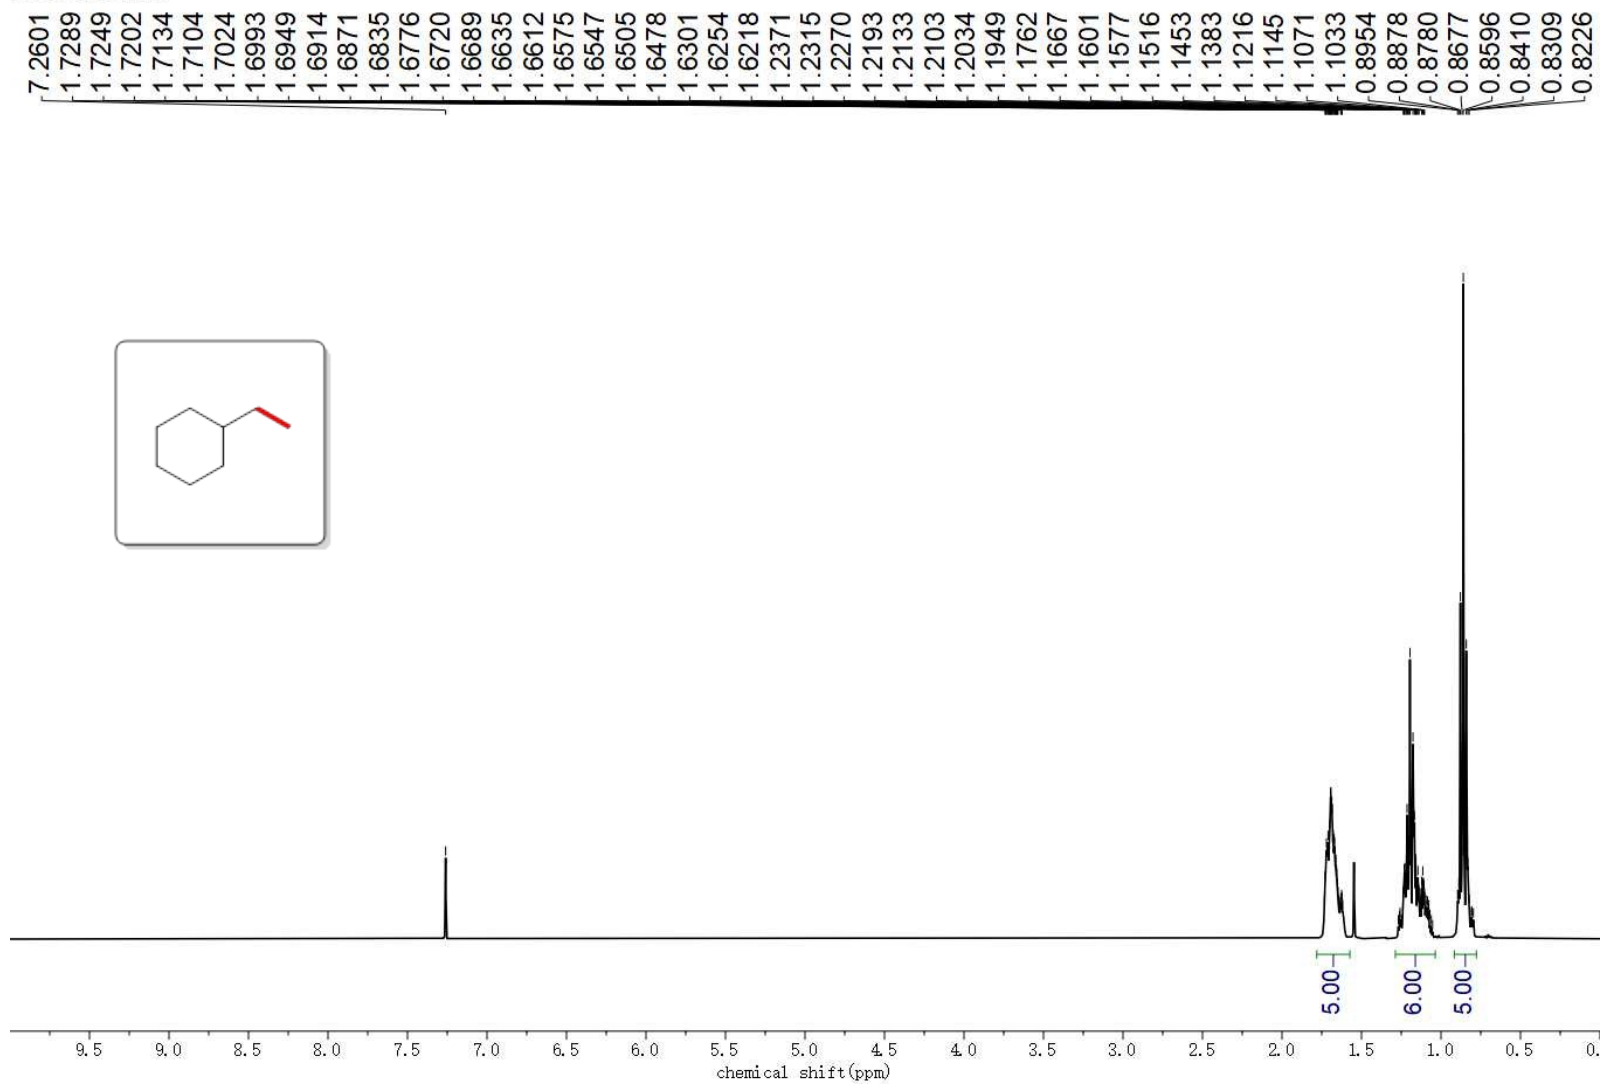

JWJ-2024-273

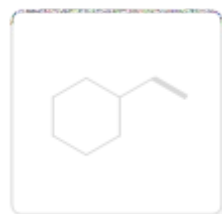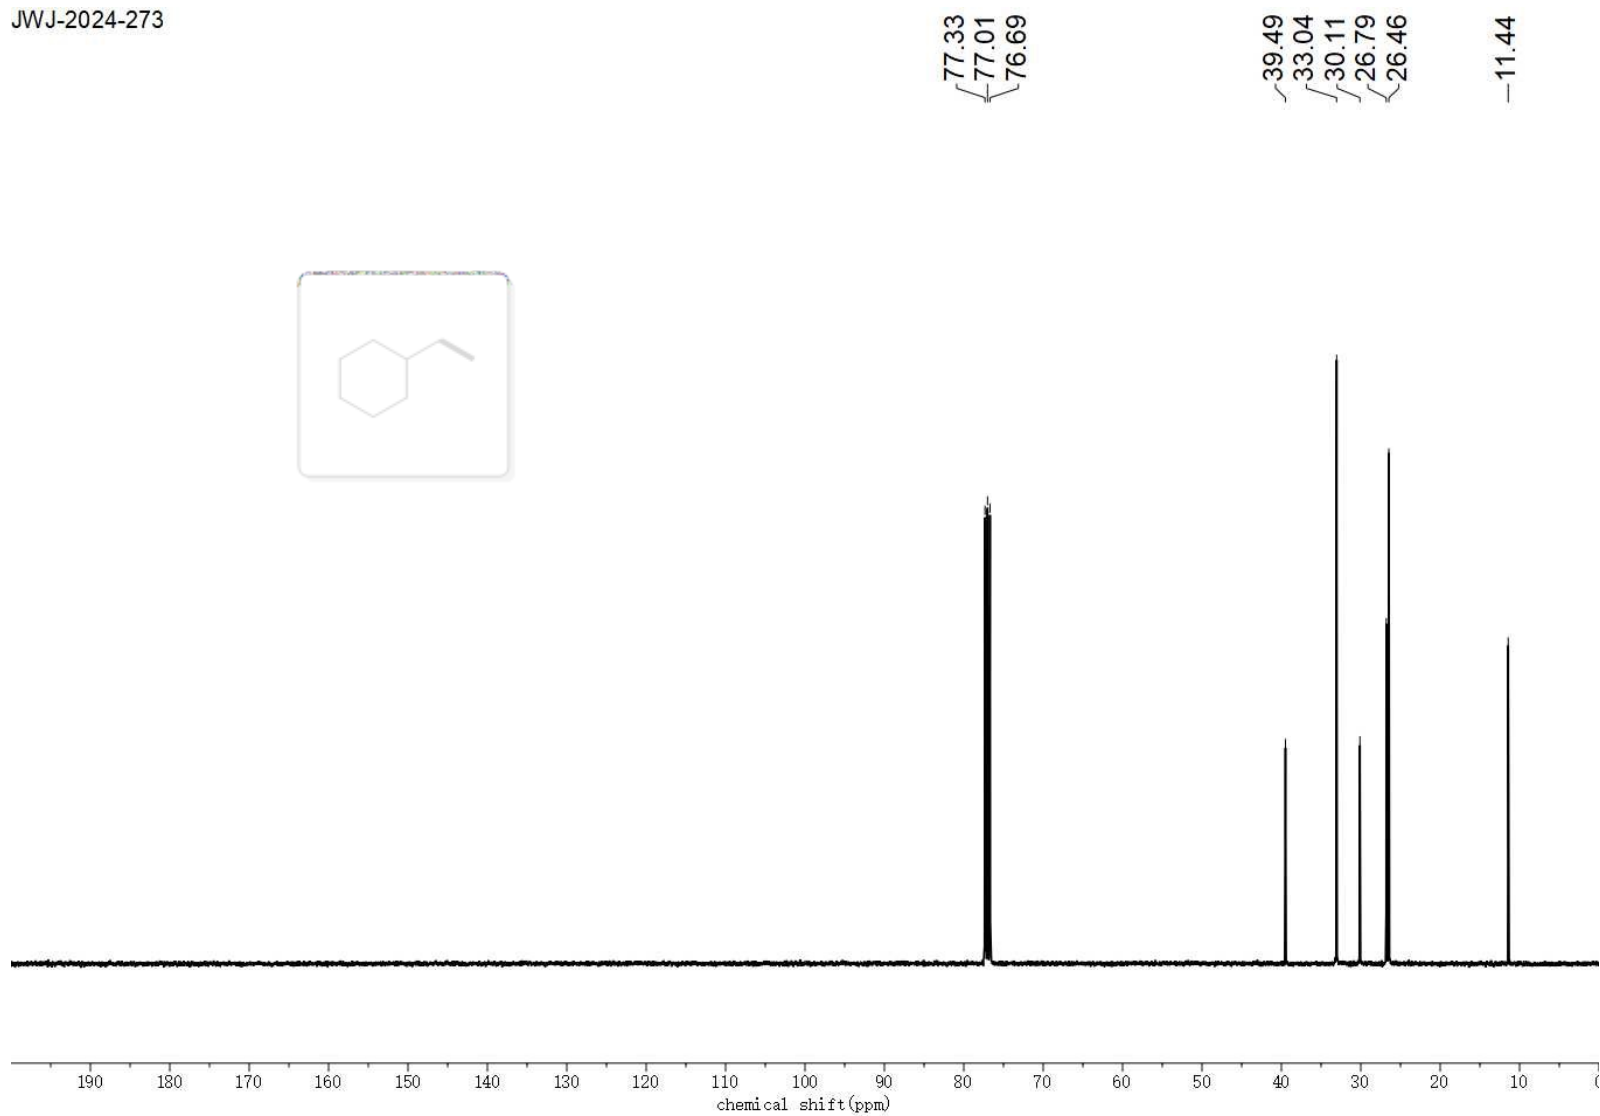

JWJ-2024-441

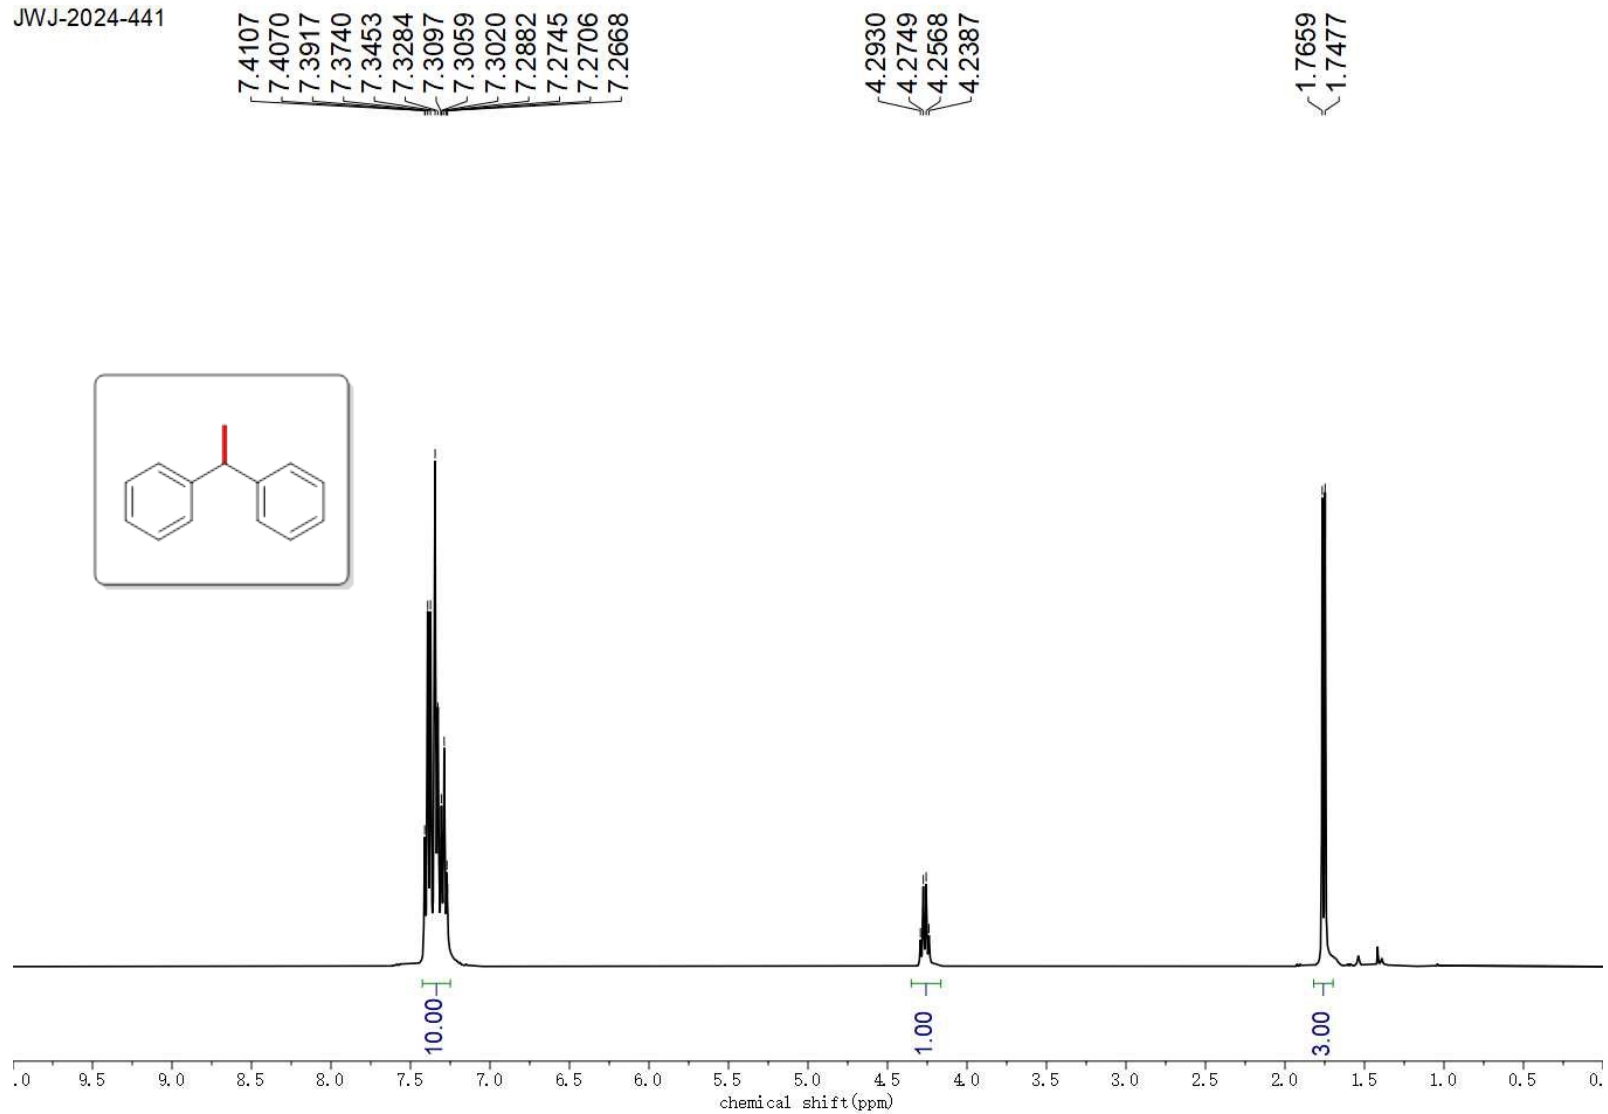

JWJ-2024-441

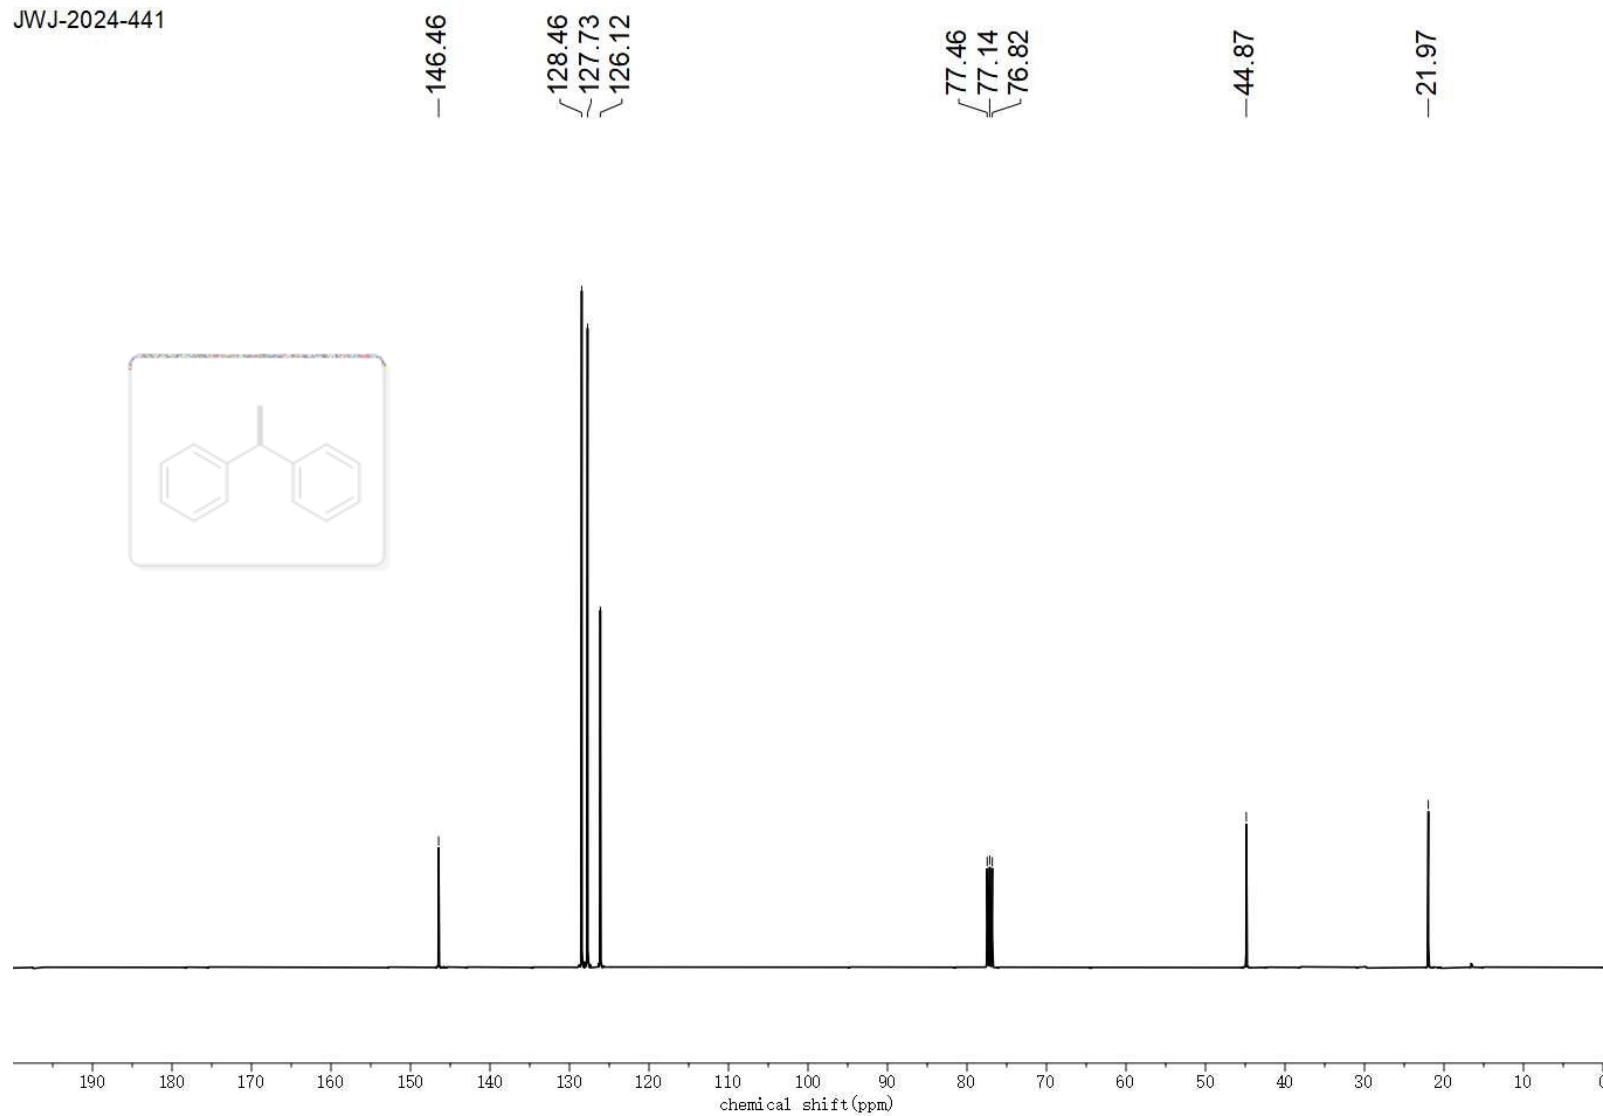



JWJ-2024-383

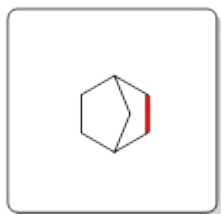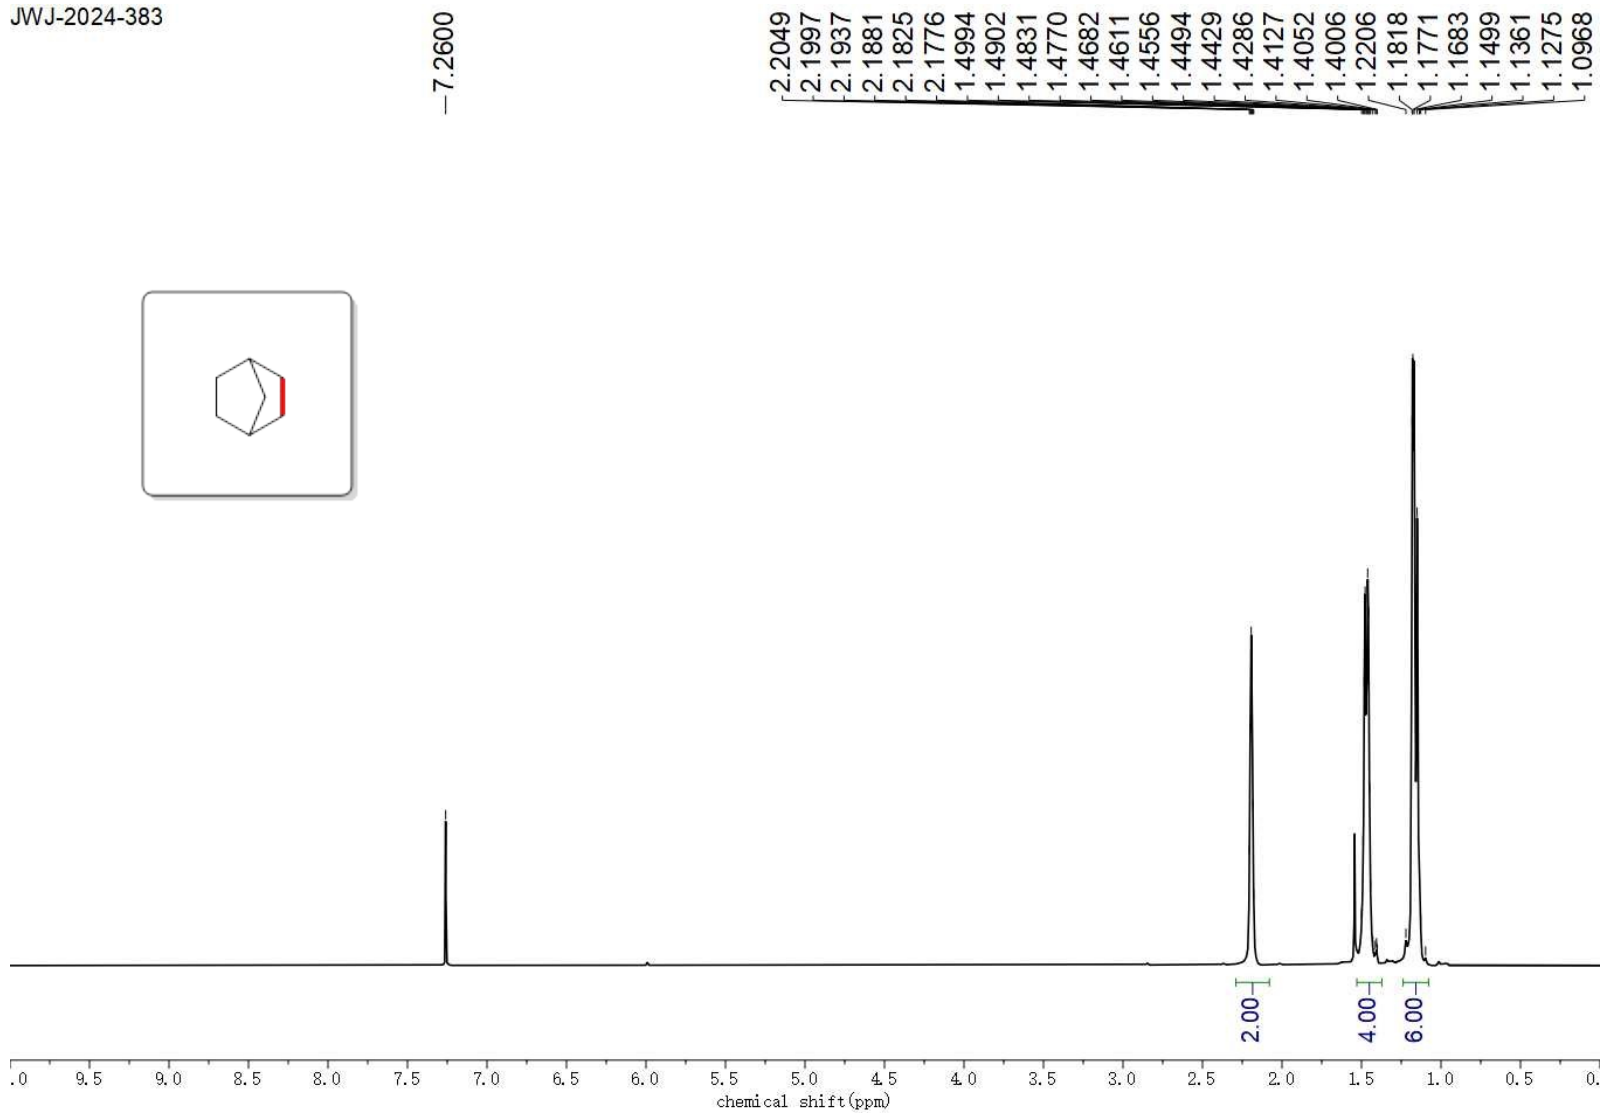

JWJ-2024-383

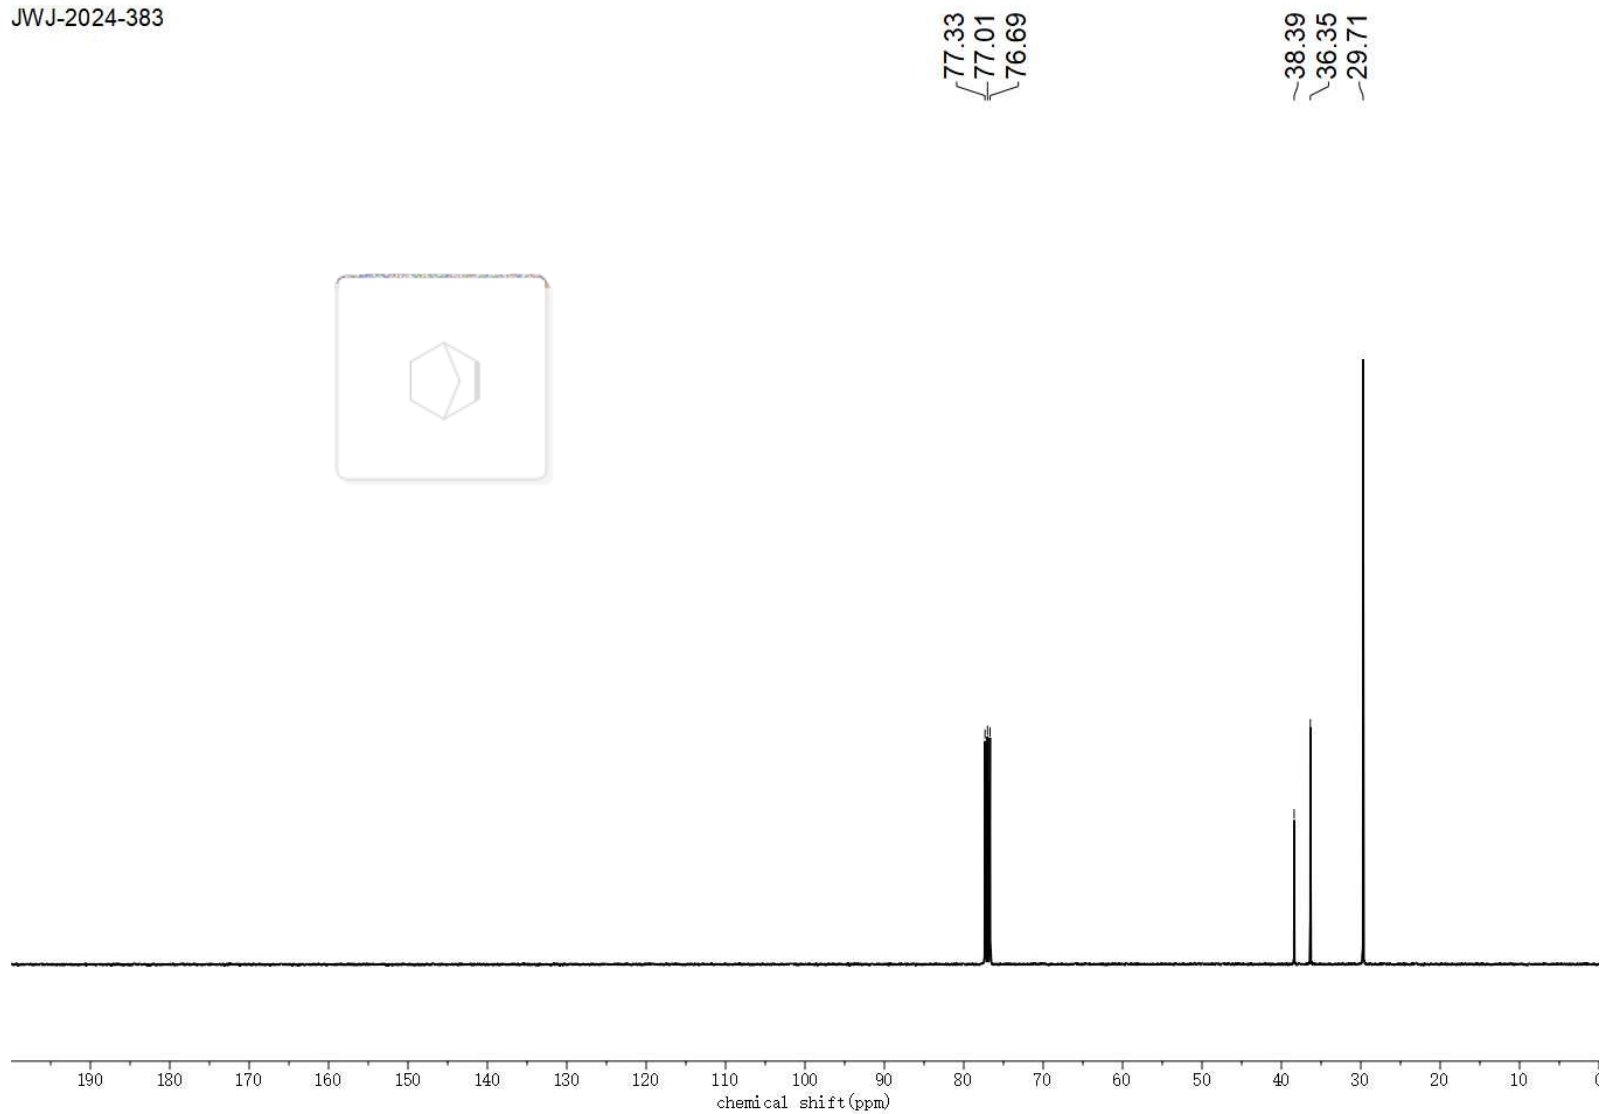

JWJ-2024-438

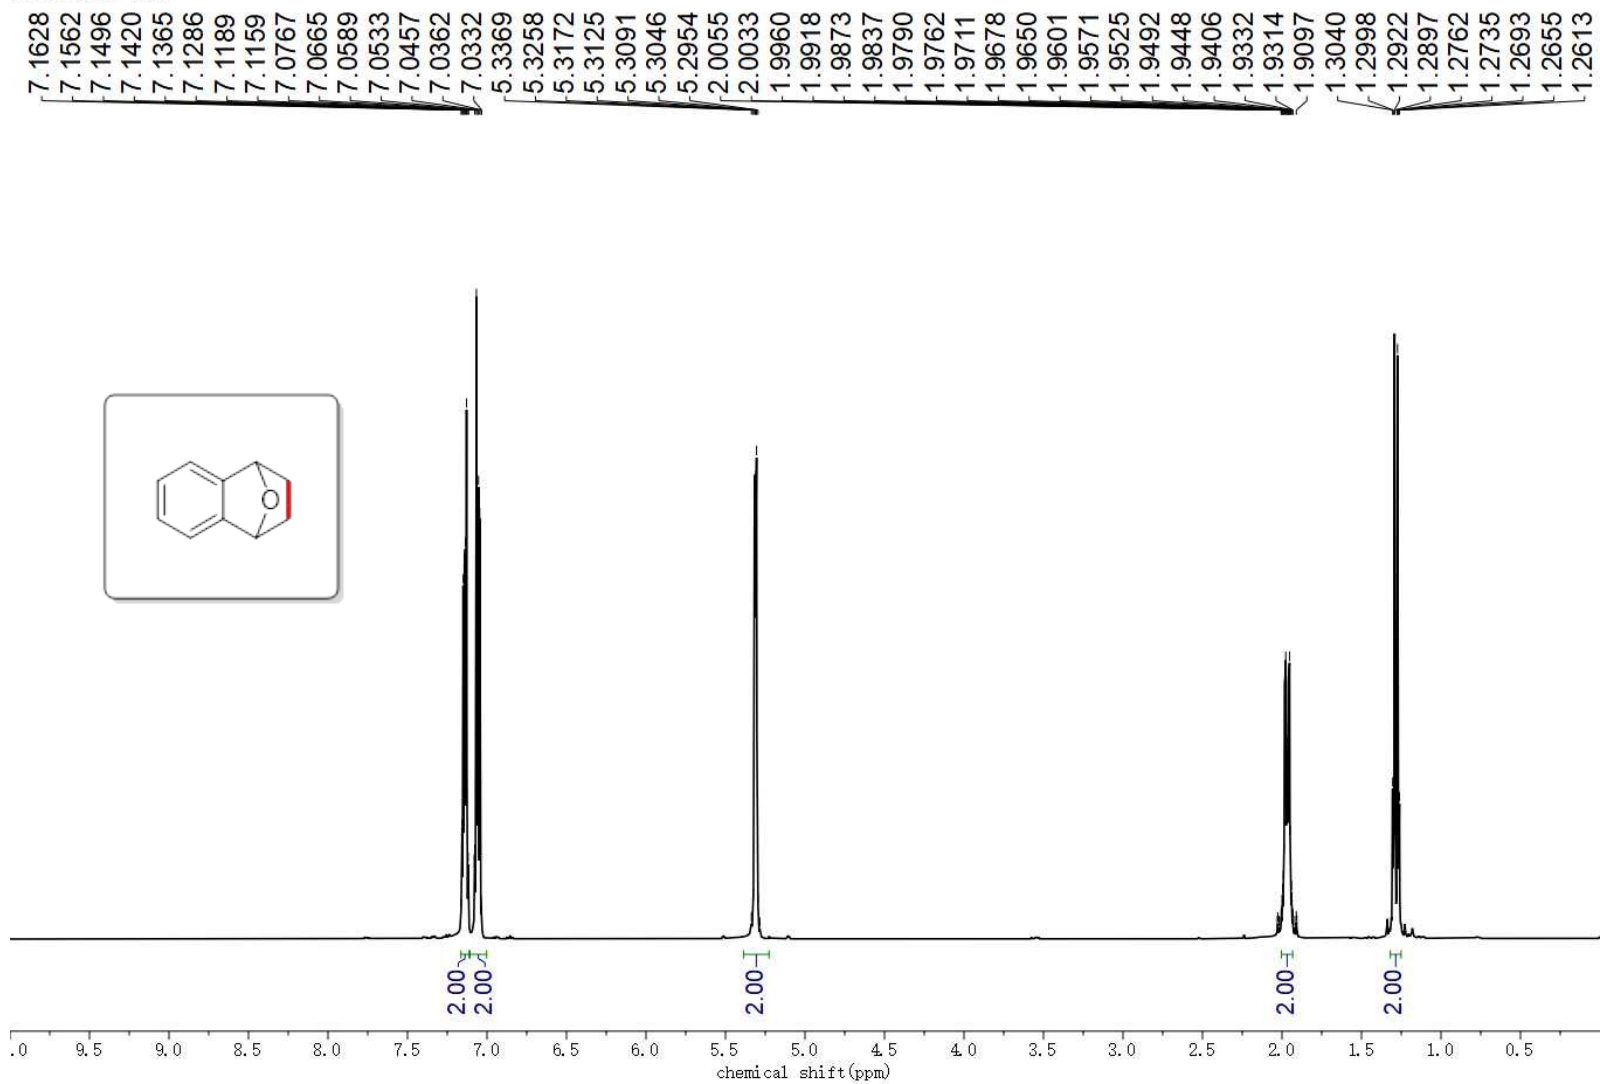

JWJ-2024-438

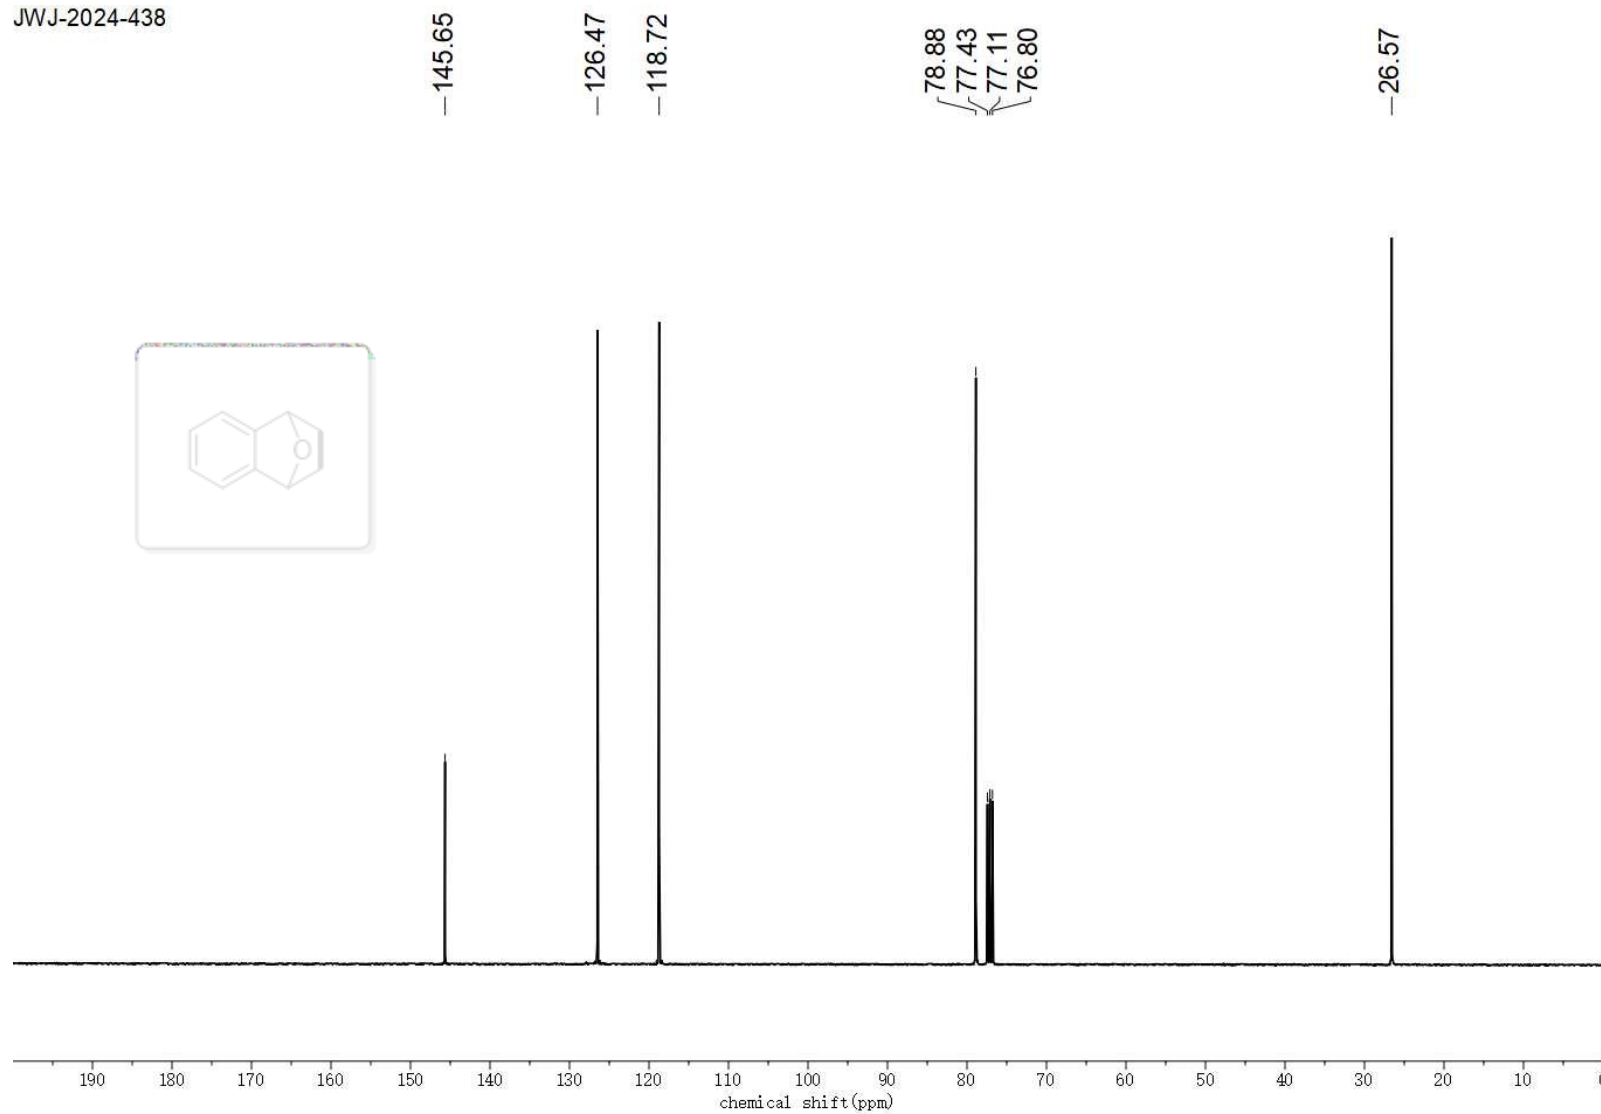

JWJ-2024-364

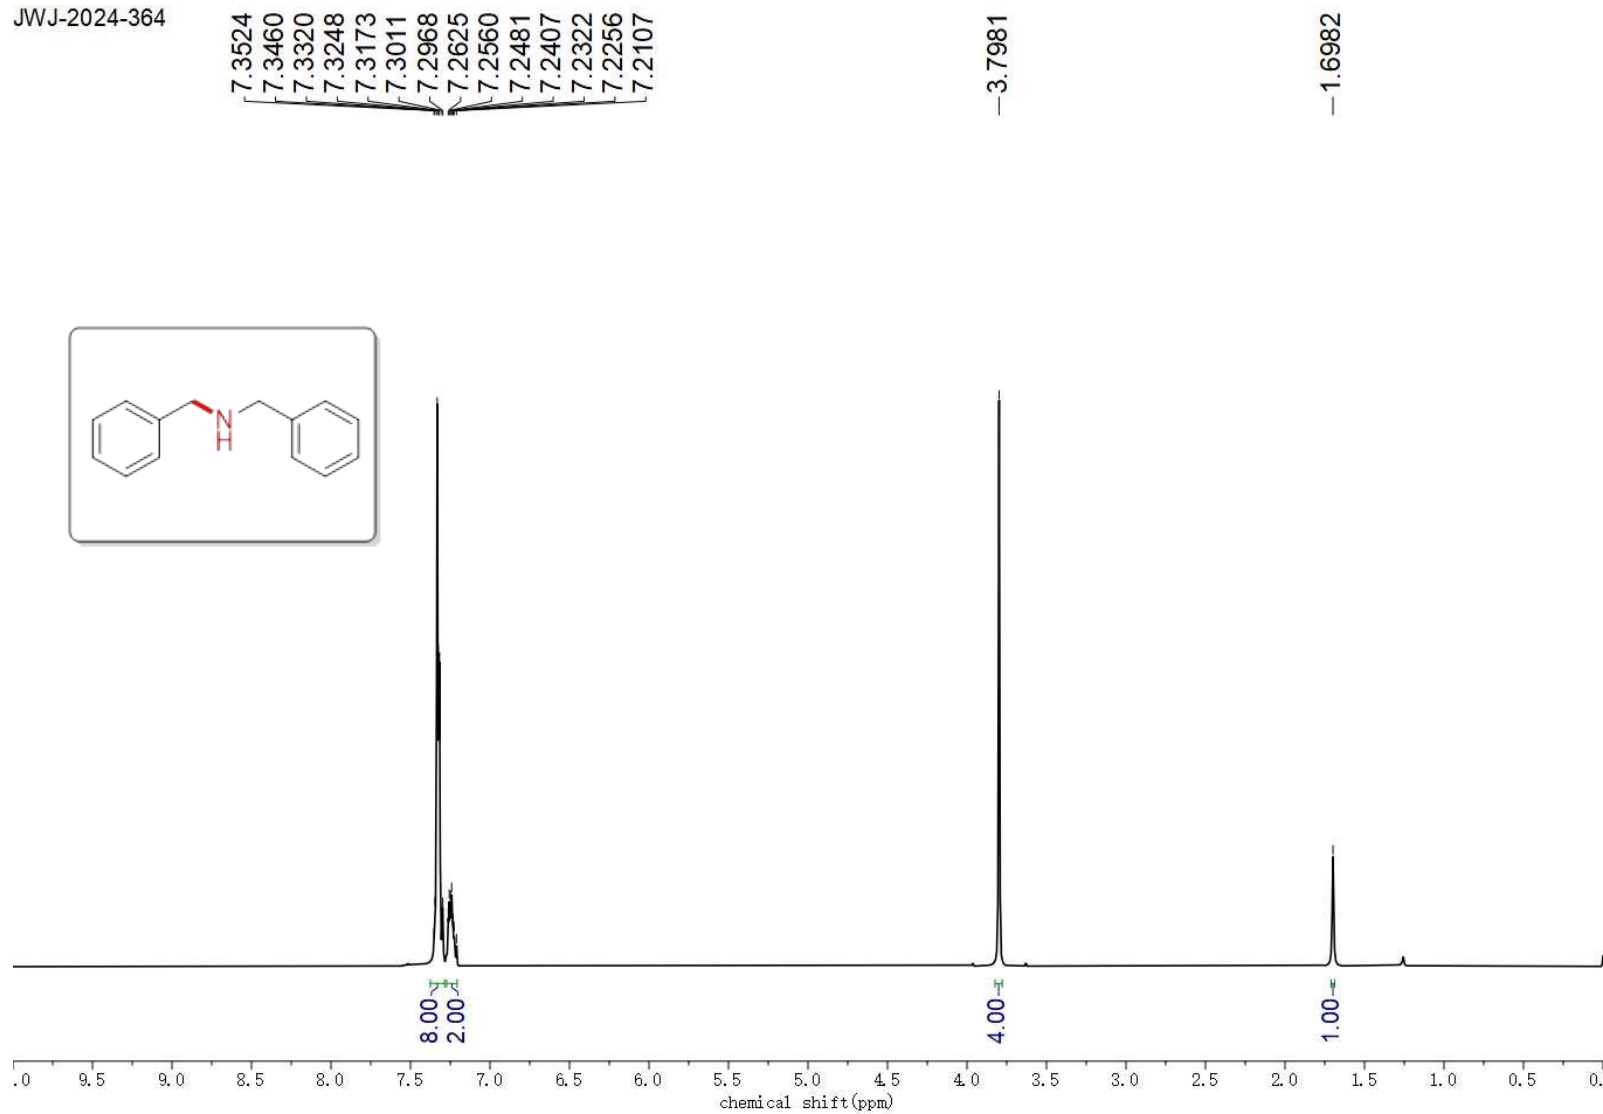

JWJ-2024-364

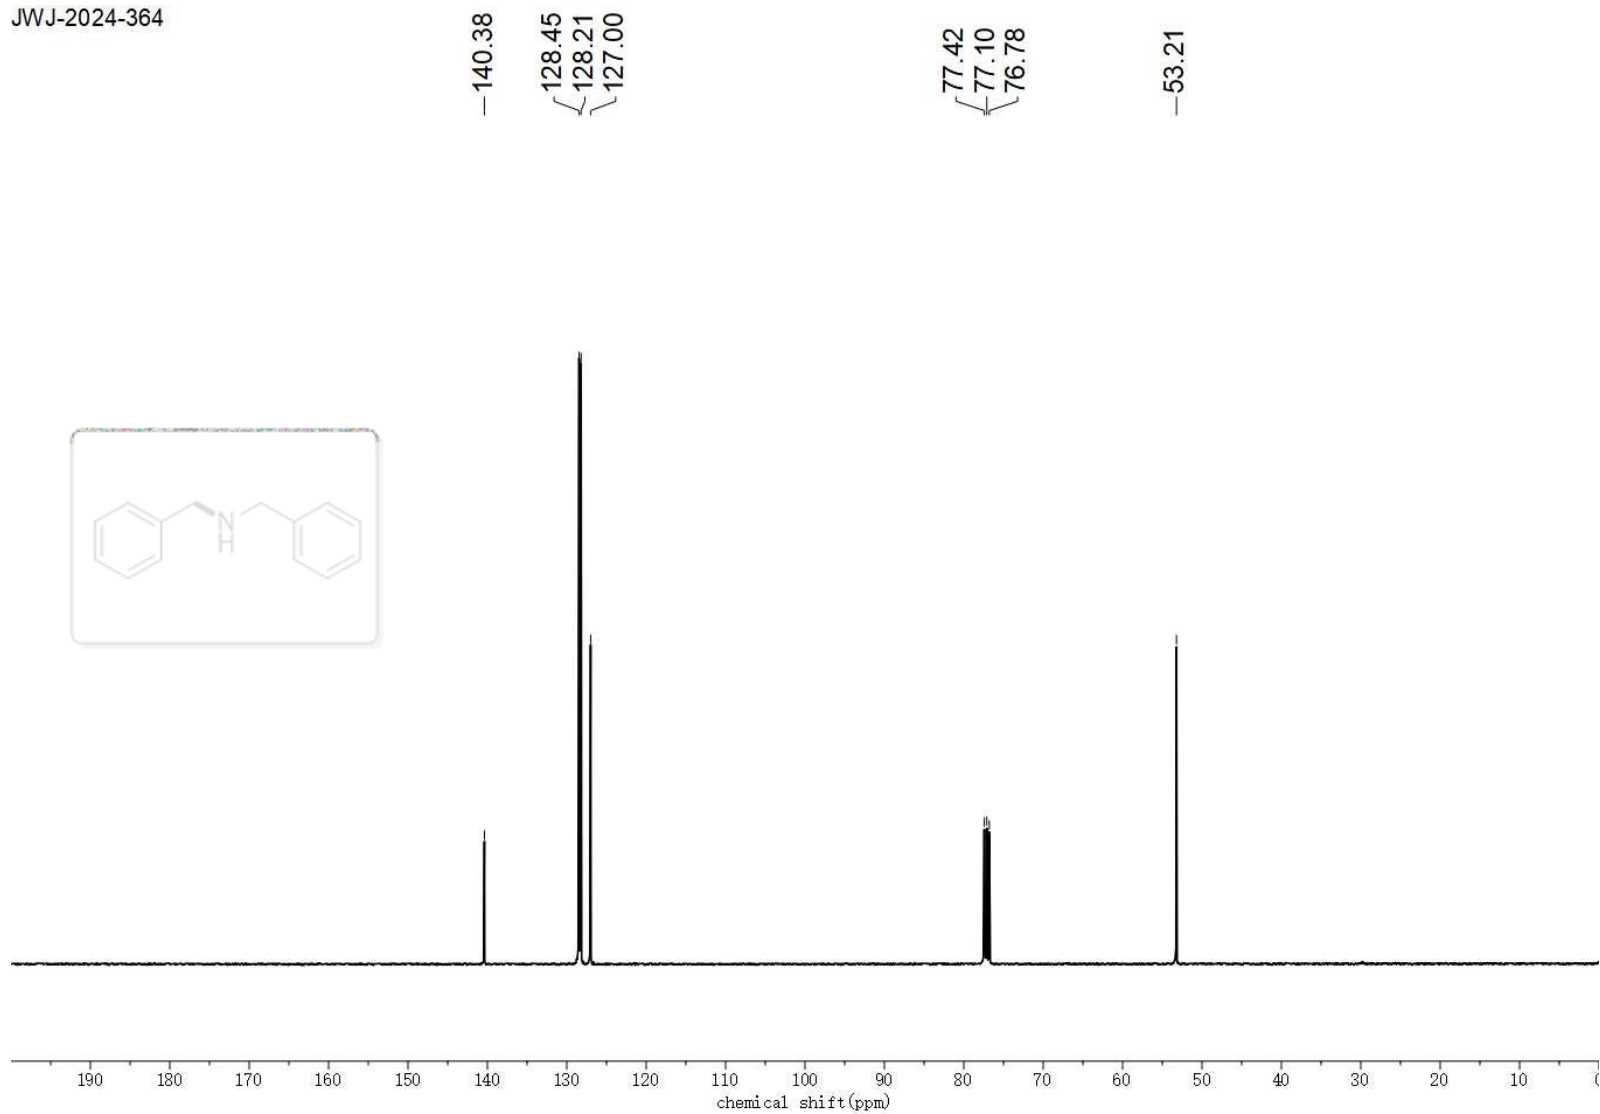

JWJ-2024-366

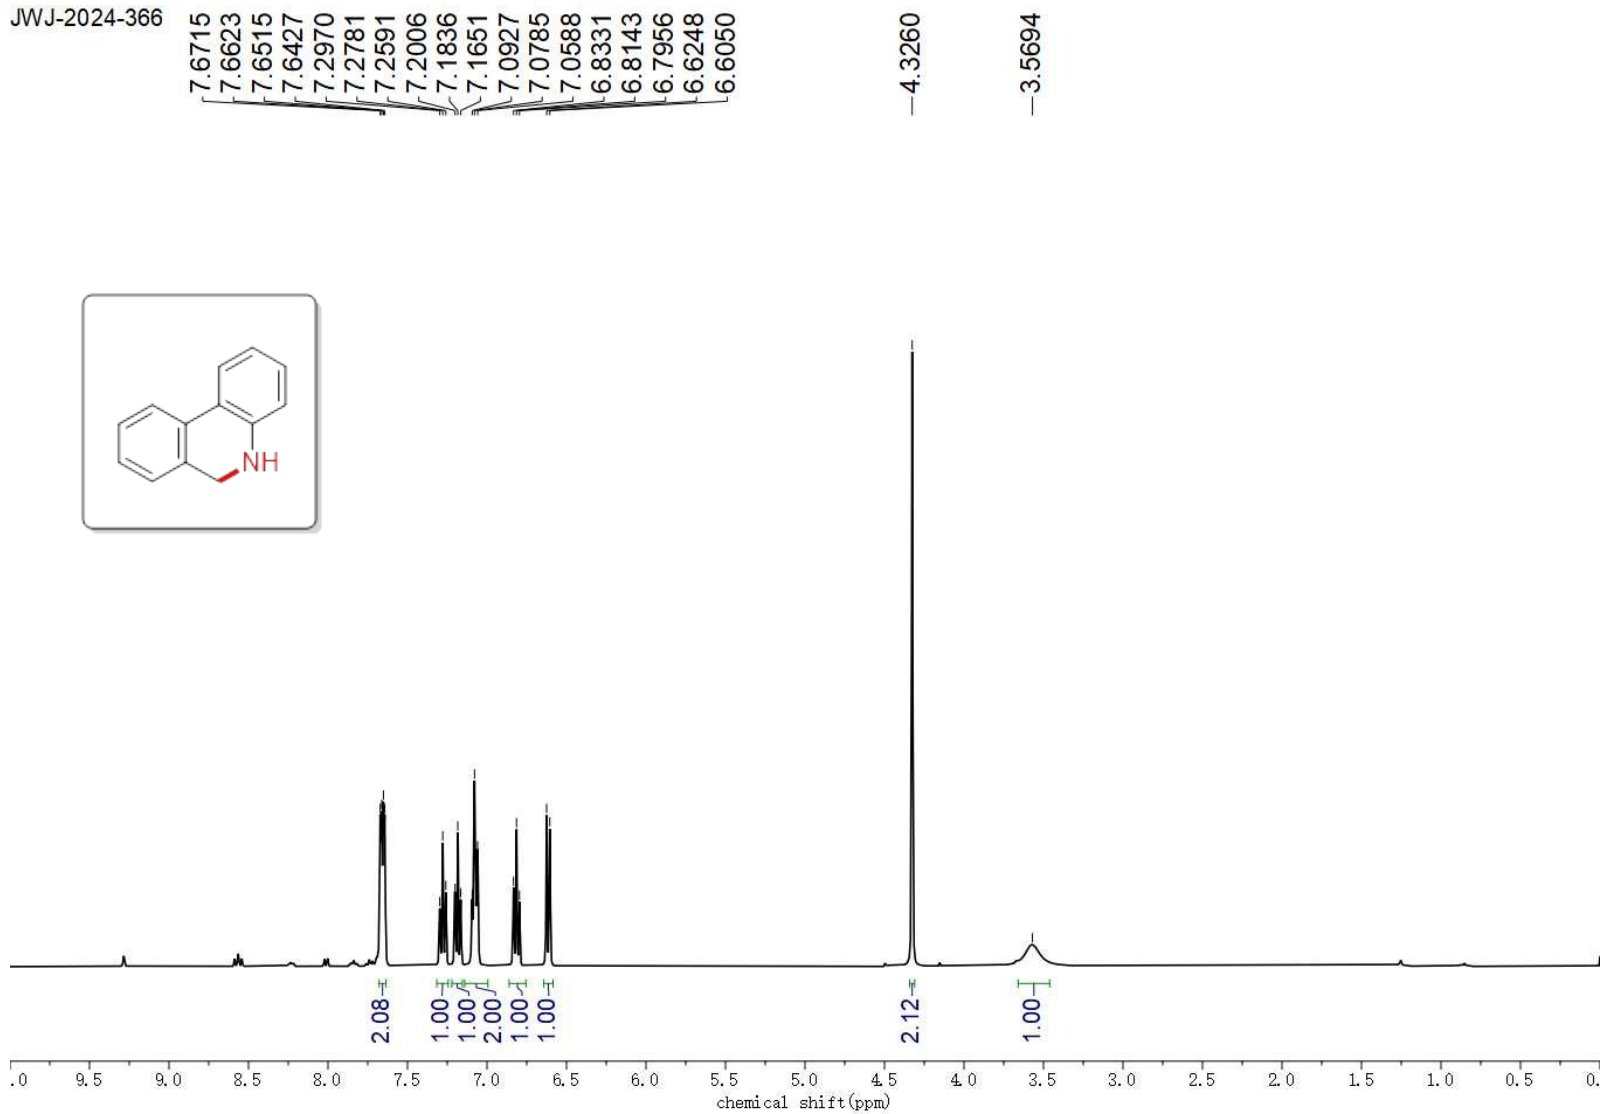

JWJ-2024-366

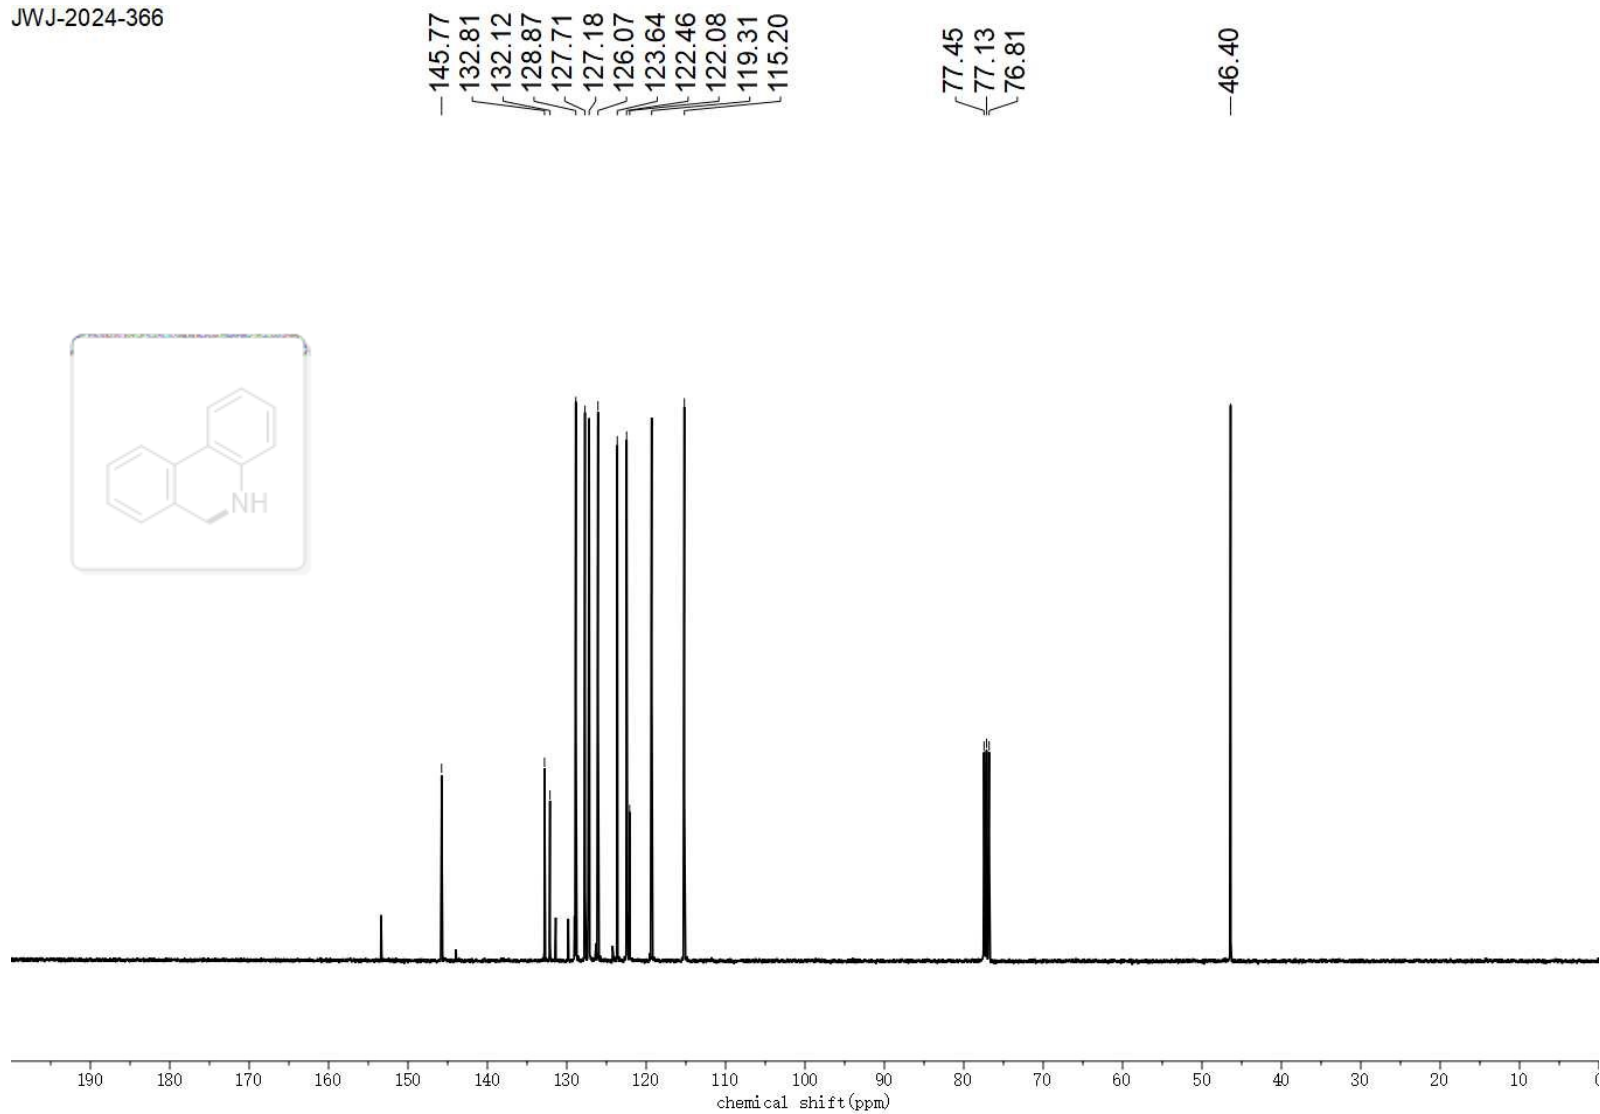



JWJ-2024-386

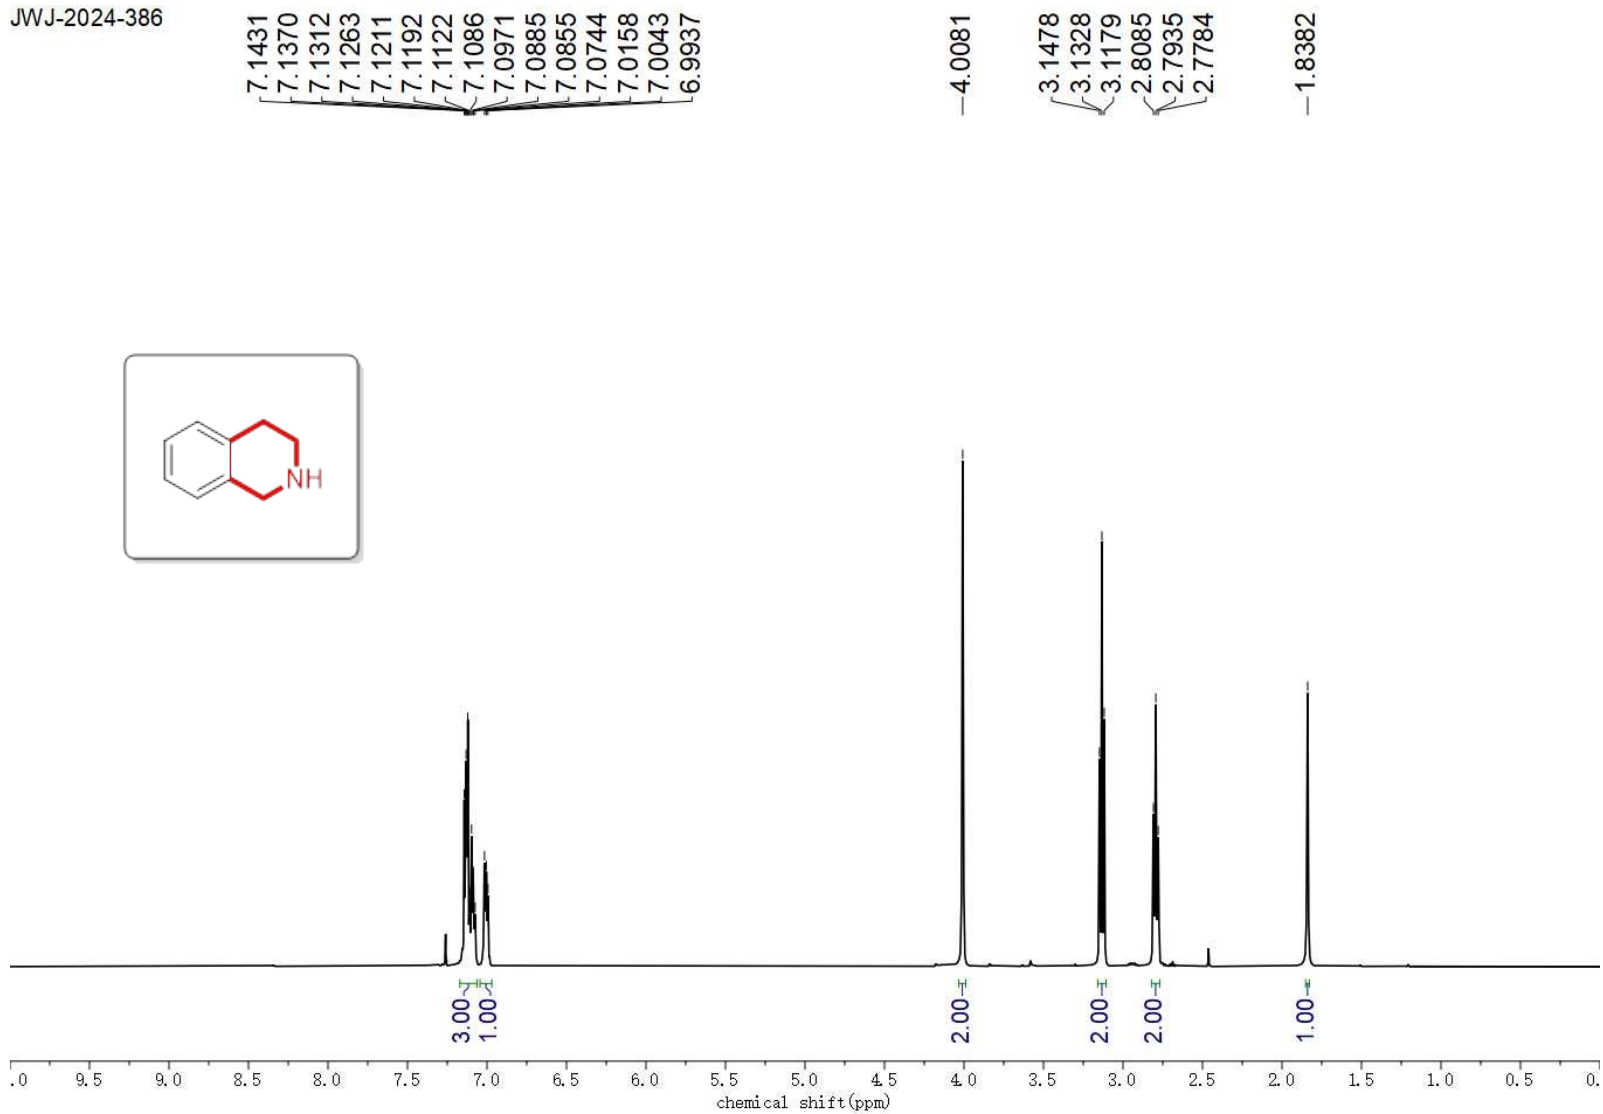

JWJ-2024-386

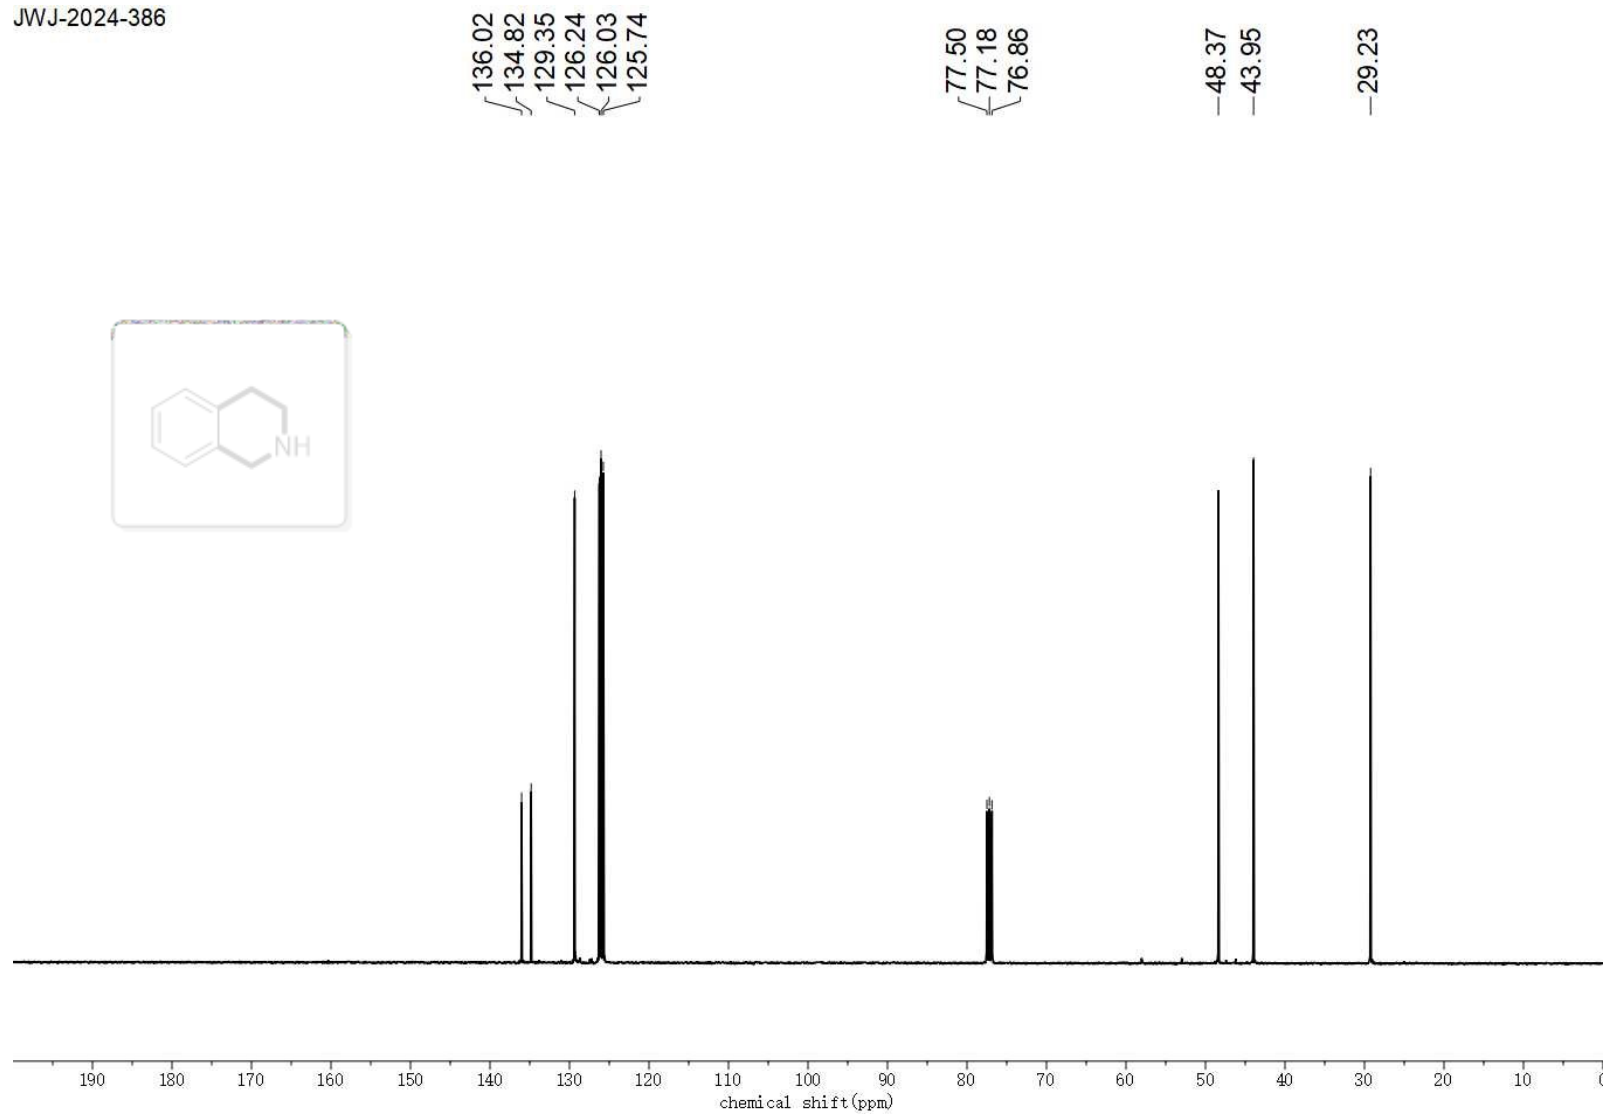

JWJ-2024-345

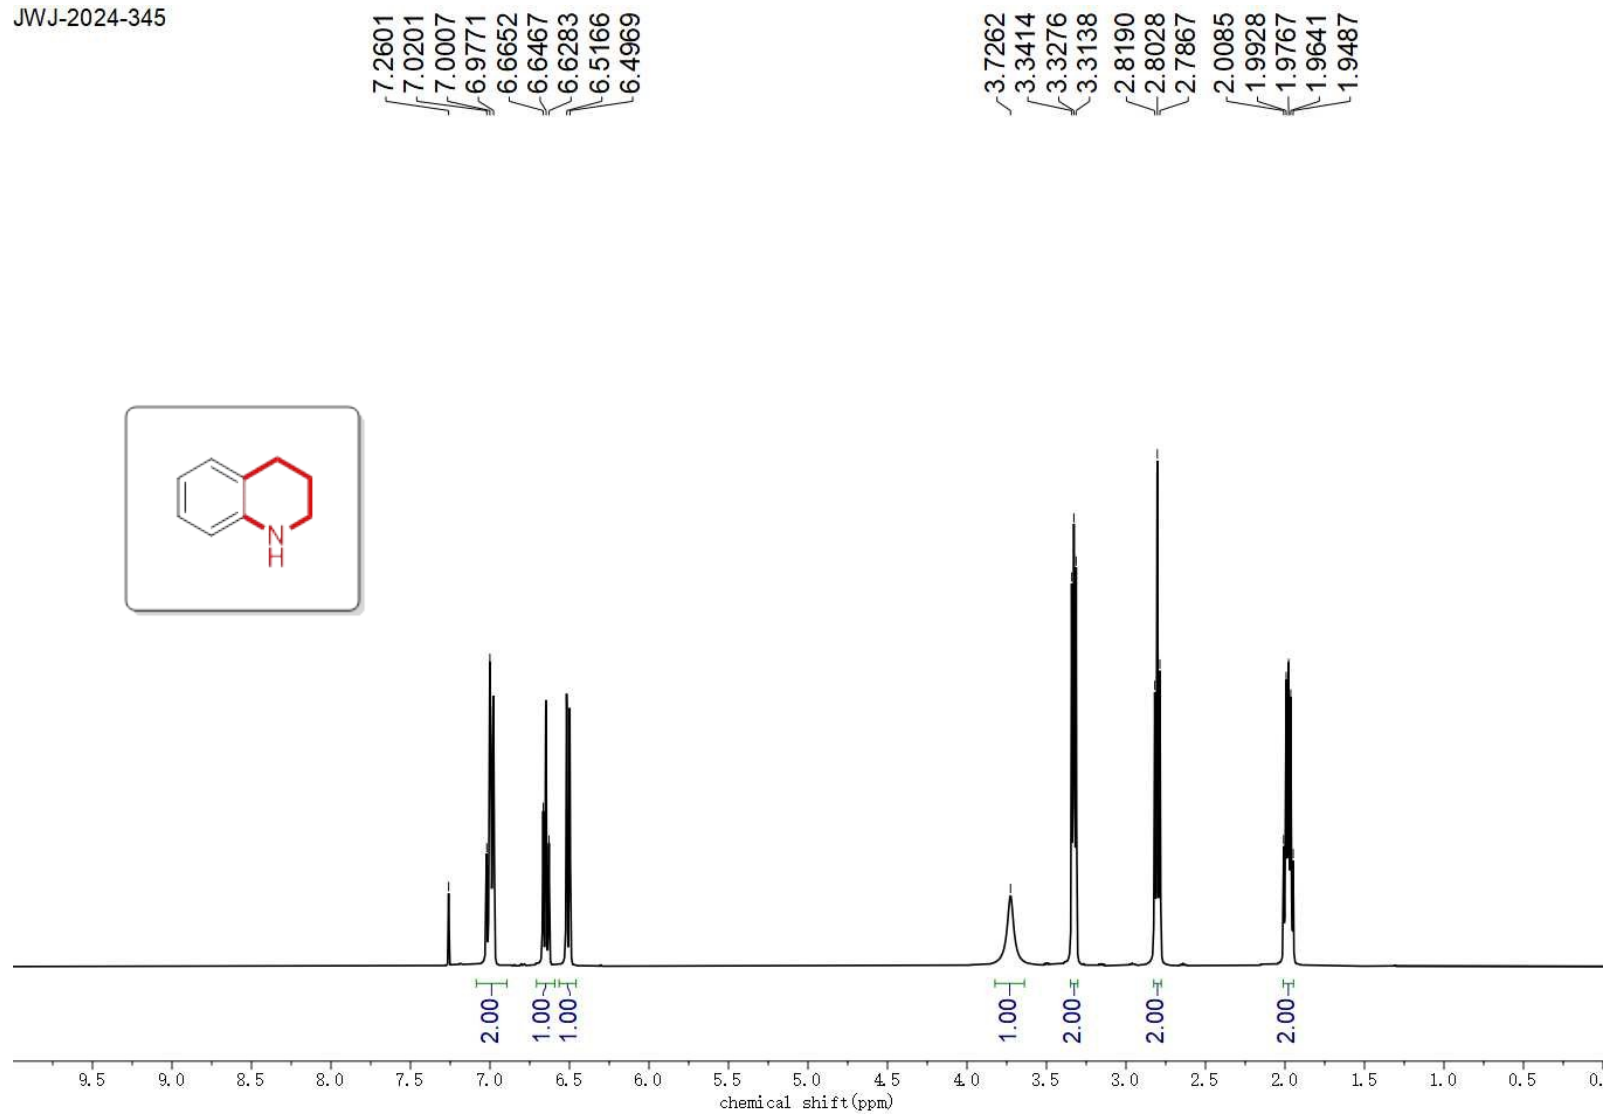

JWJ-2024-345

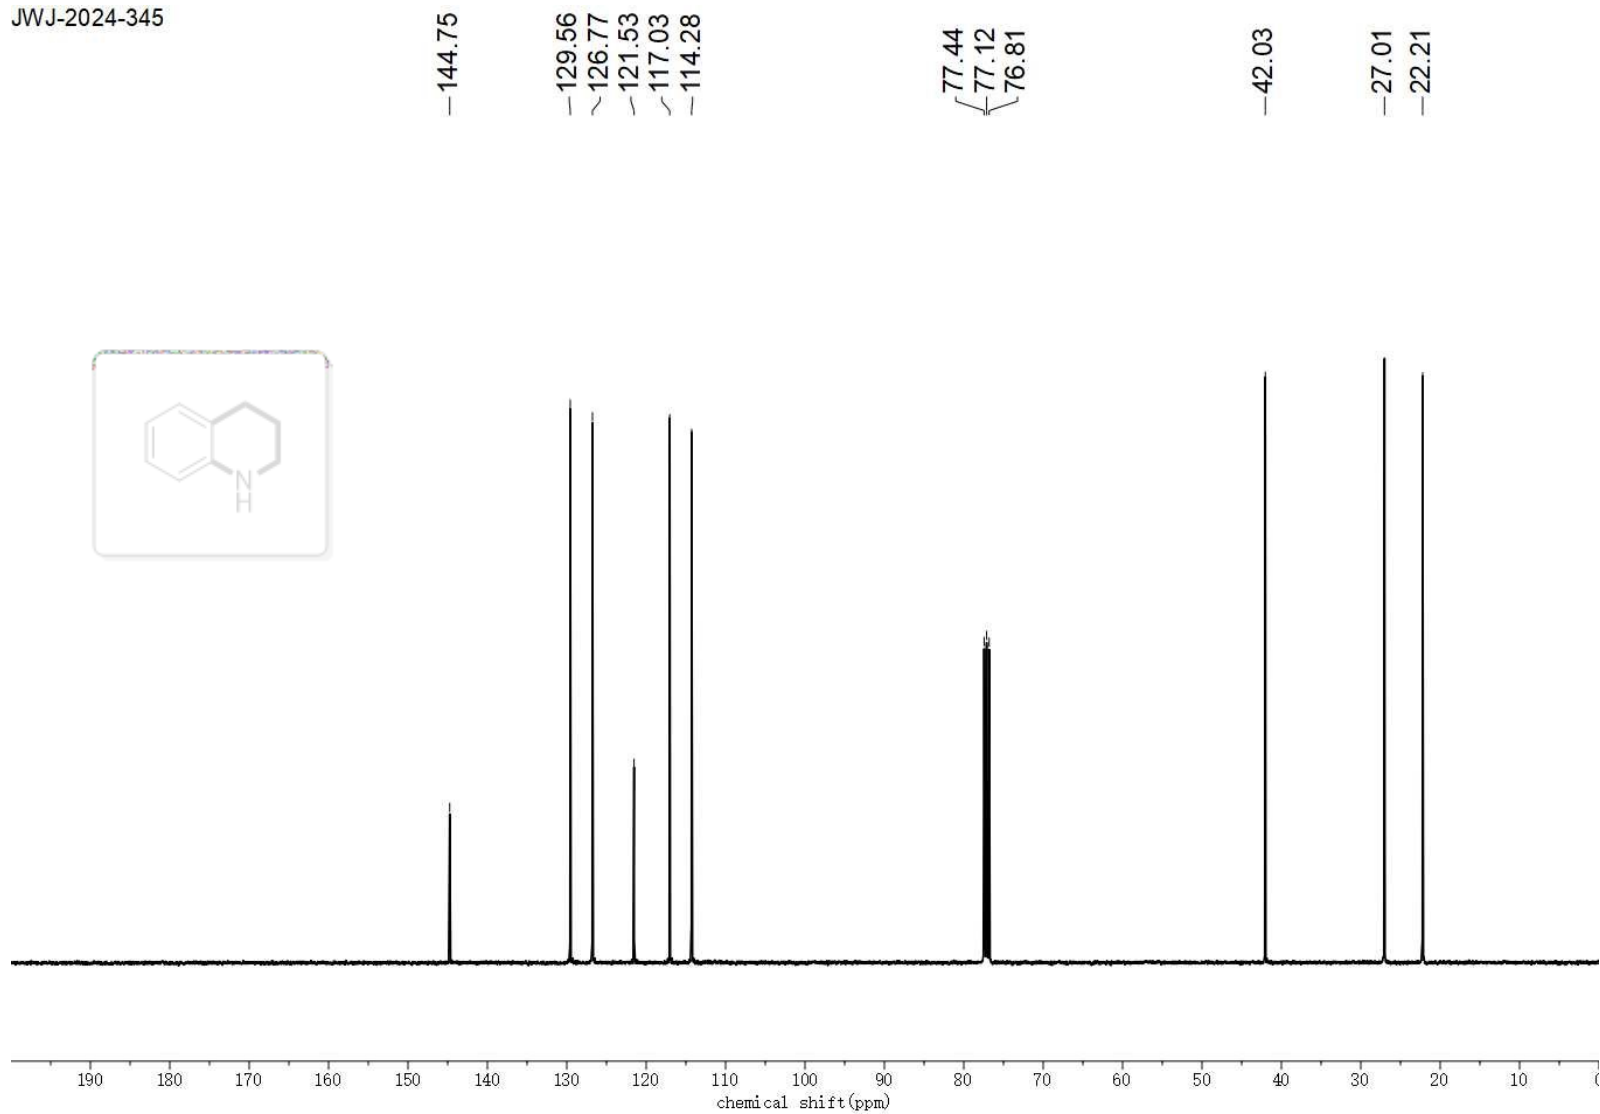

JWJ-2024-359

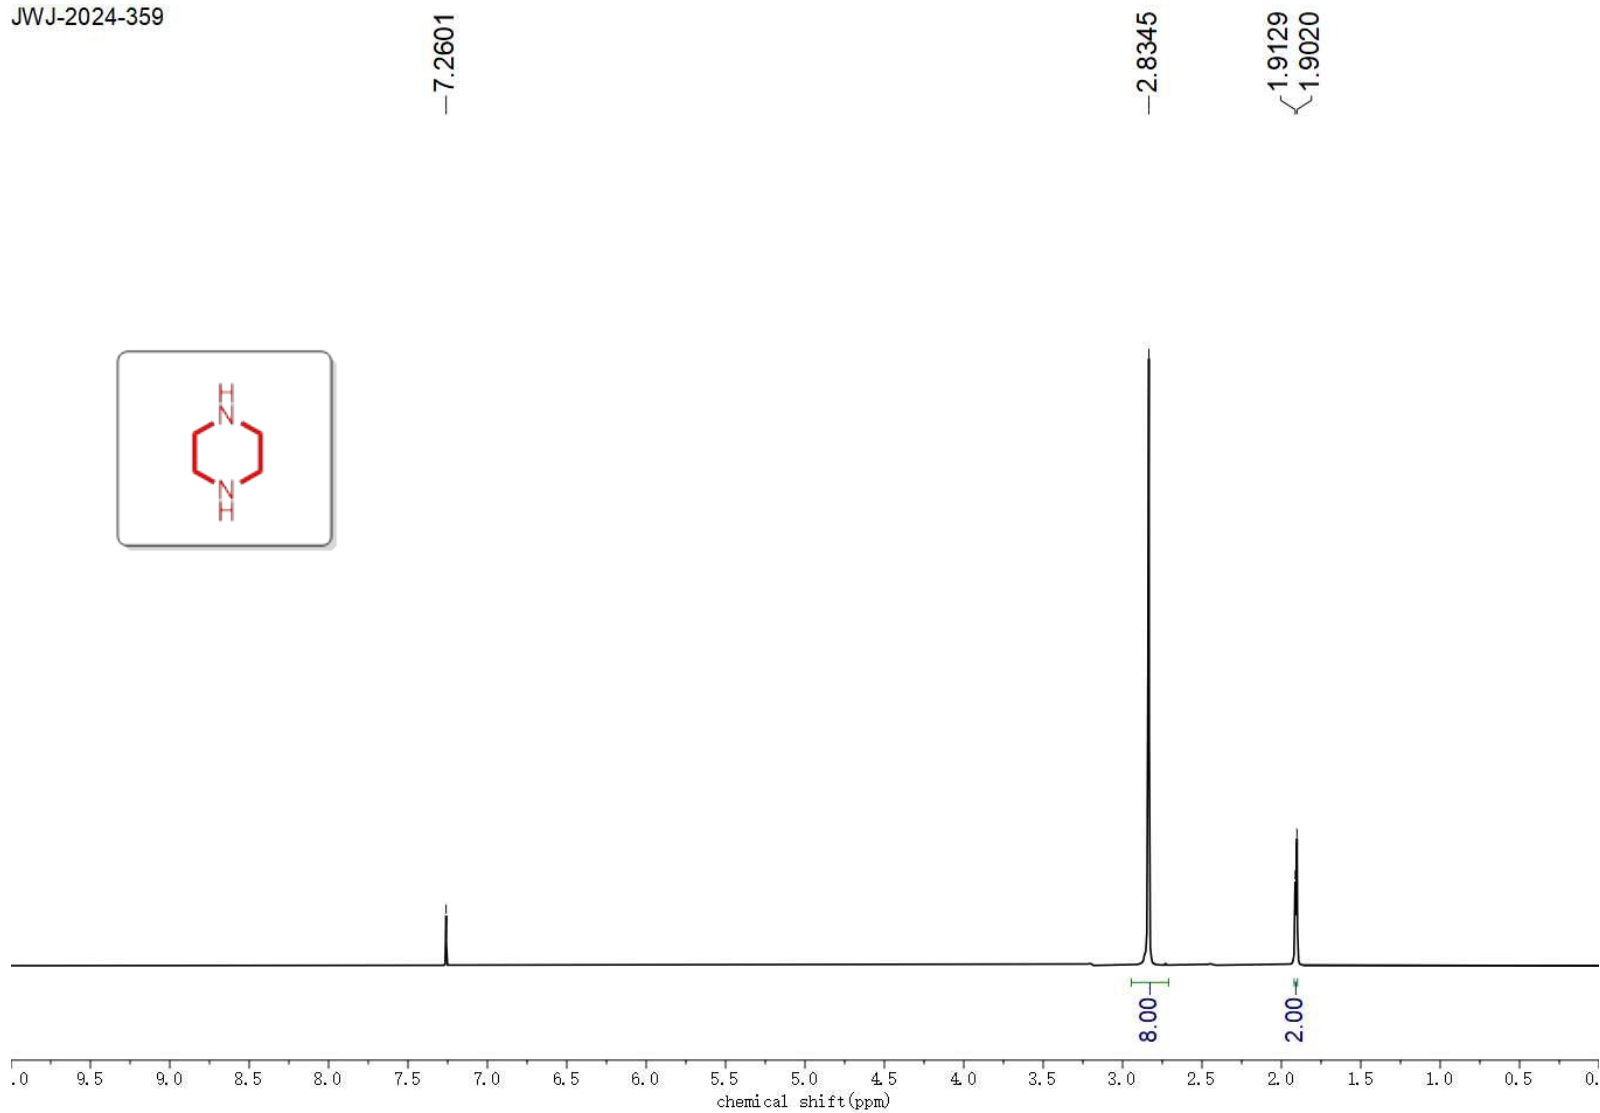

JWJ-2024-359

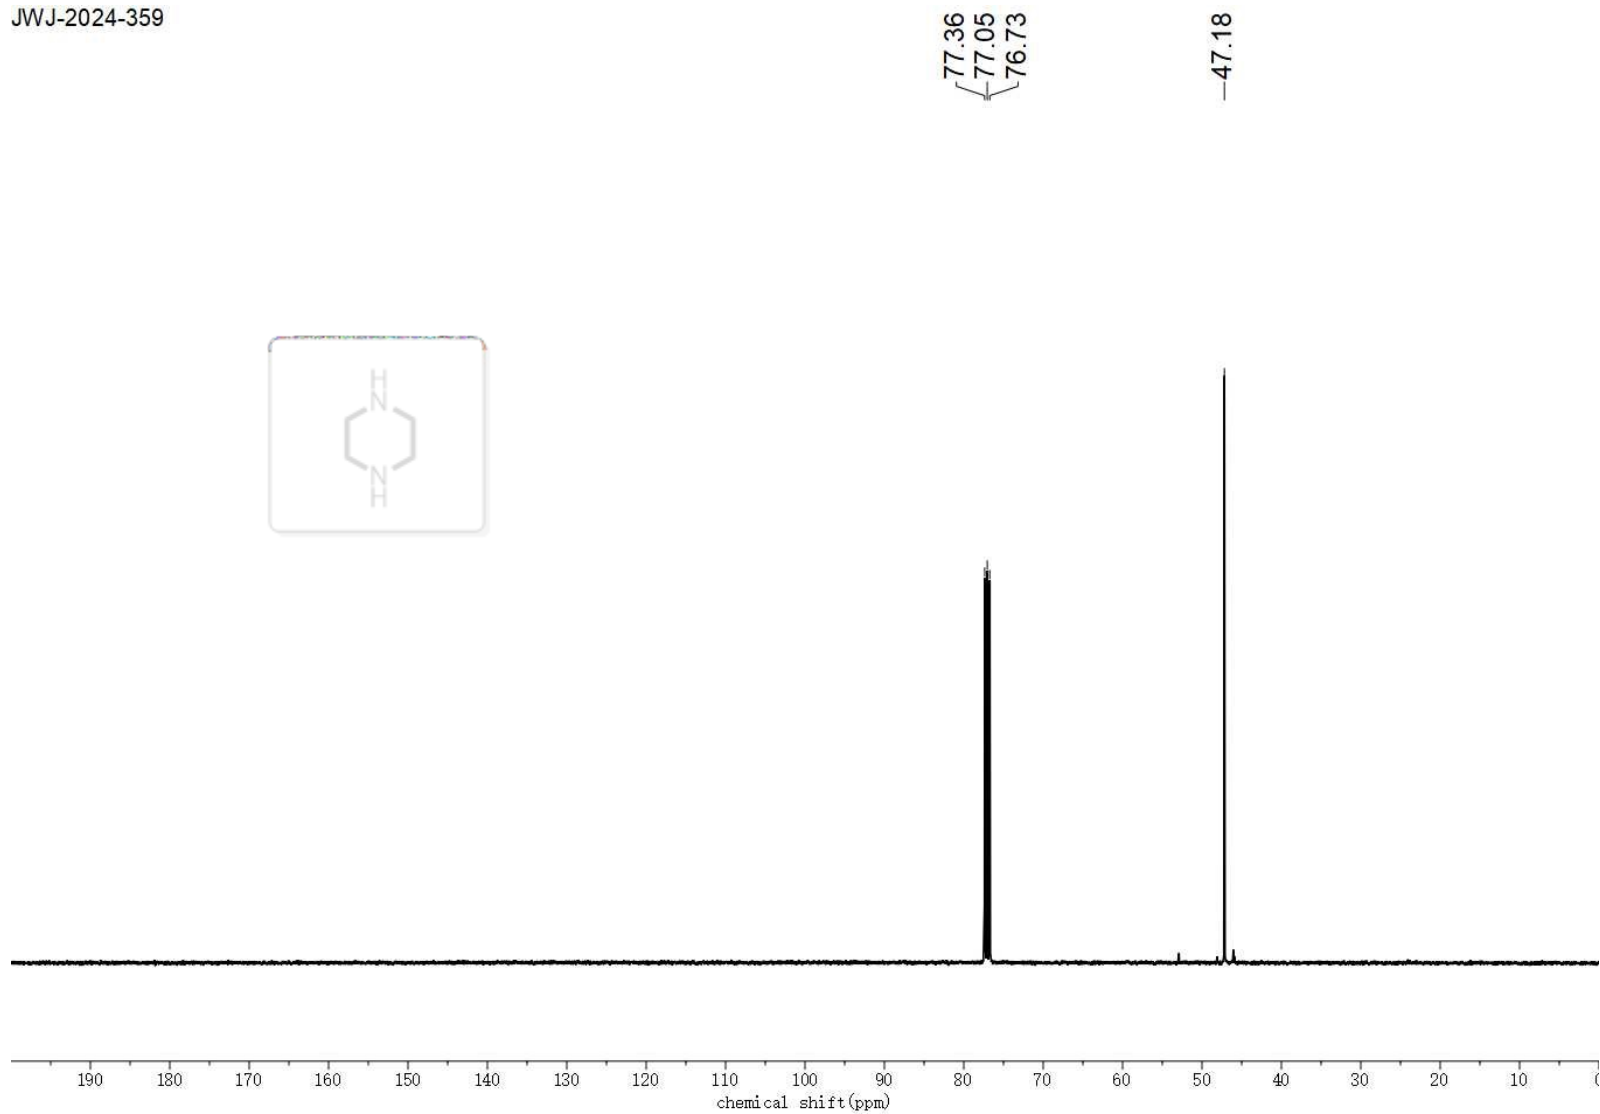

JWJ-2024-280

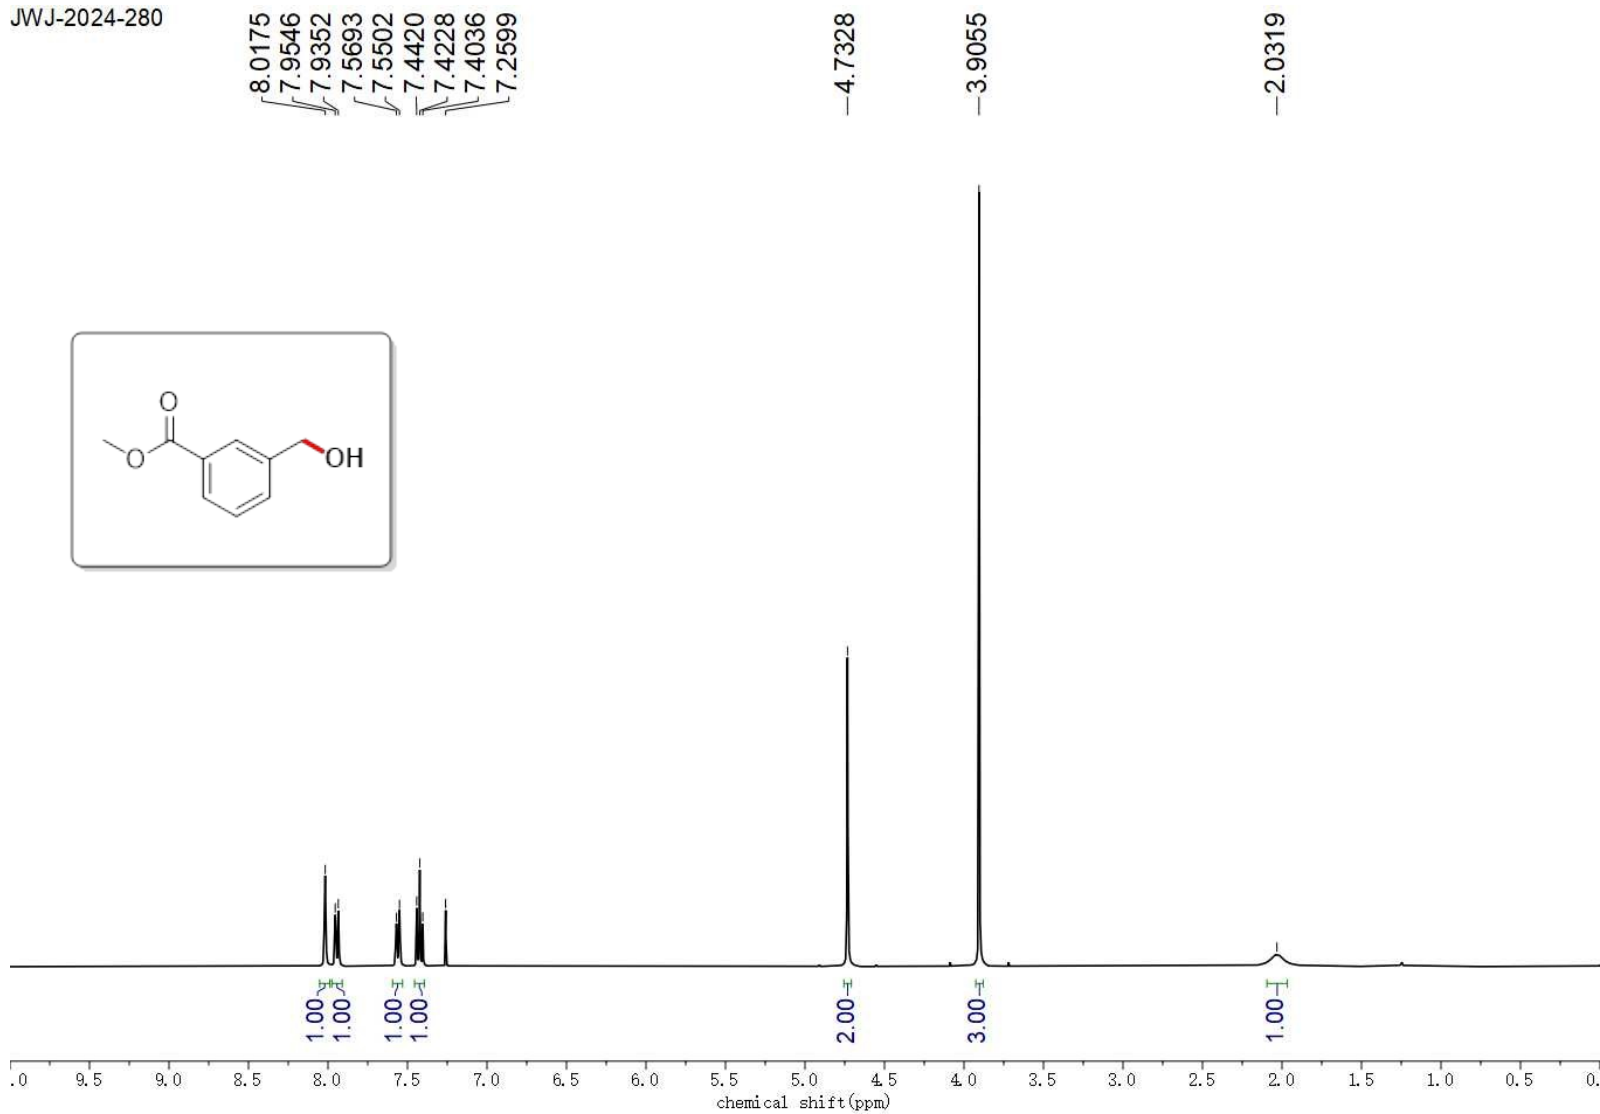

JWJ-2024-280

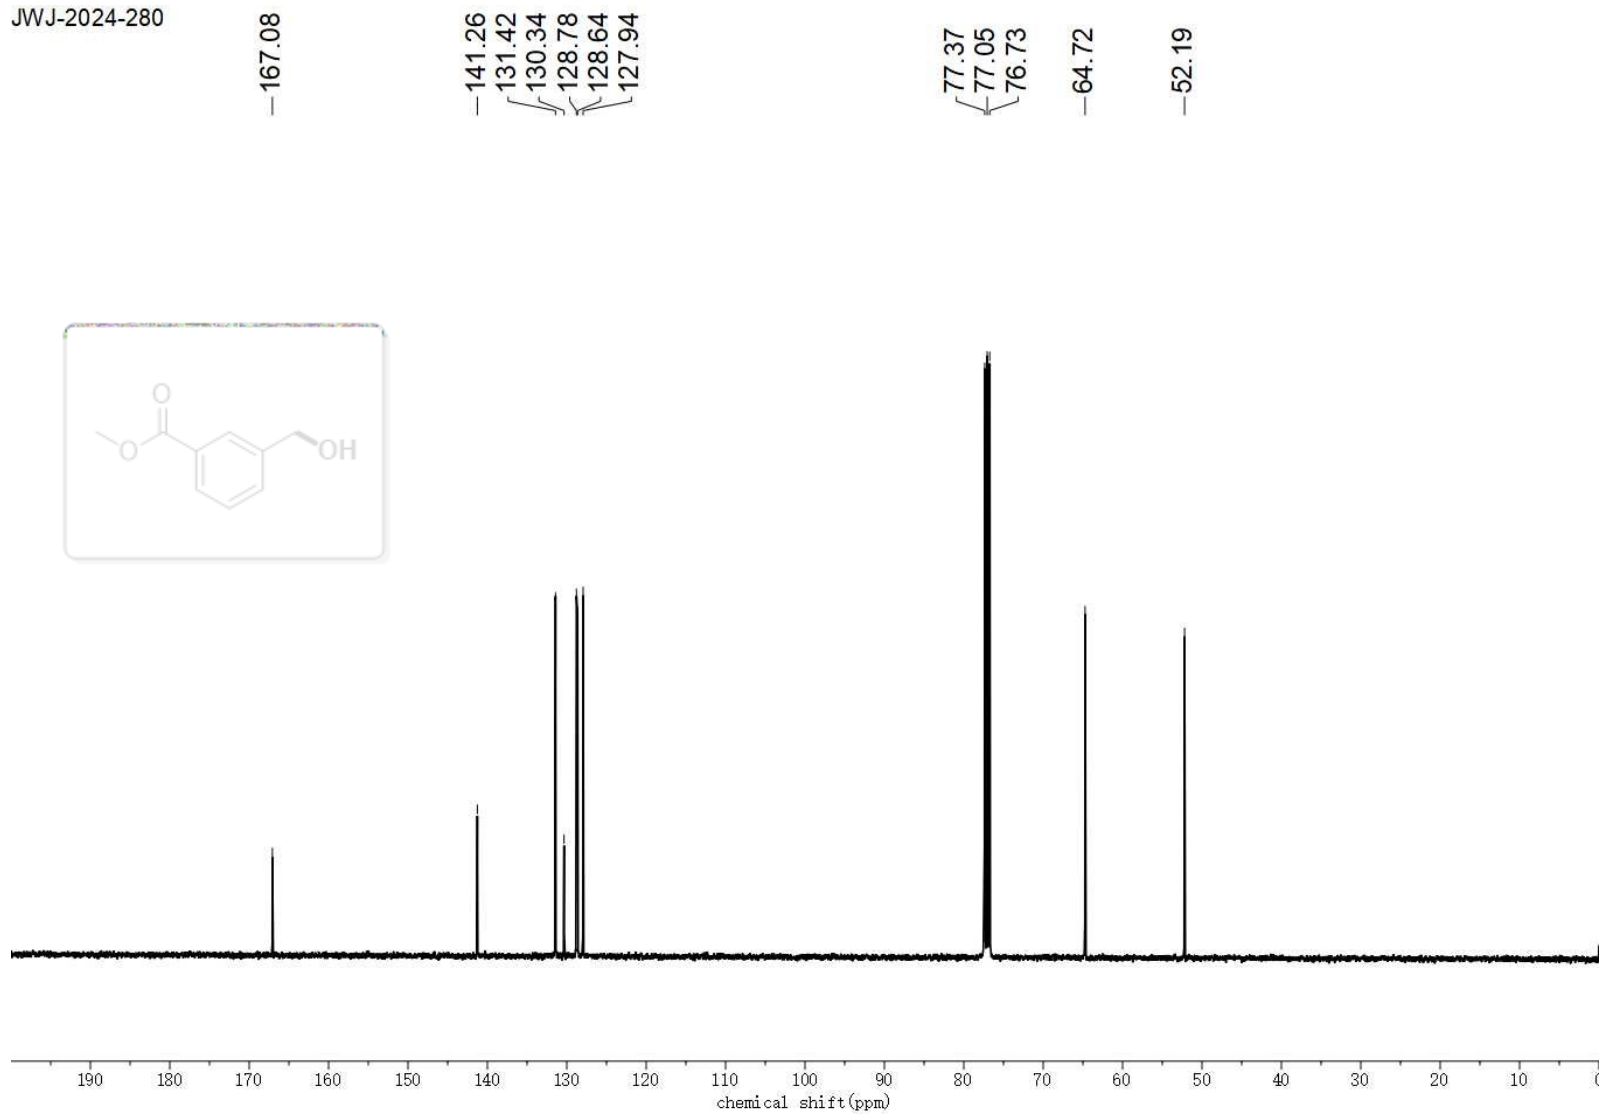



JWJ-2024-170

7.9995  
7.9787  
7.4011  
7.3810  
7.2601

4.7253  
4.3735  
4.3557  
4.3378  
4.3200

-2.4762

1.3949  
1.3769  
1.3592

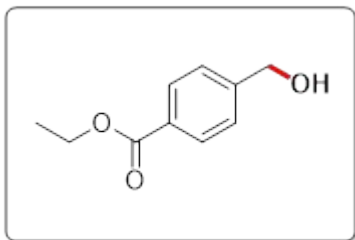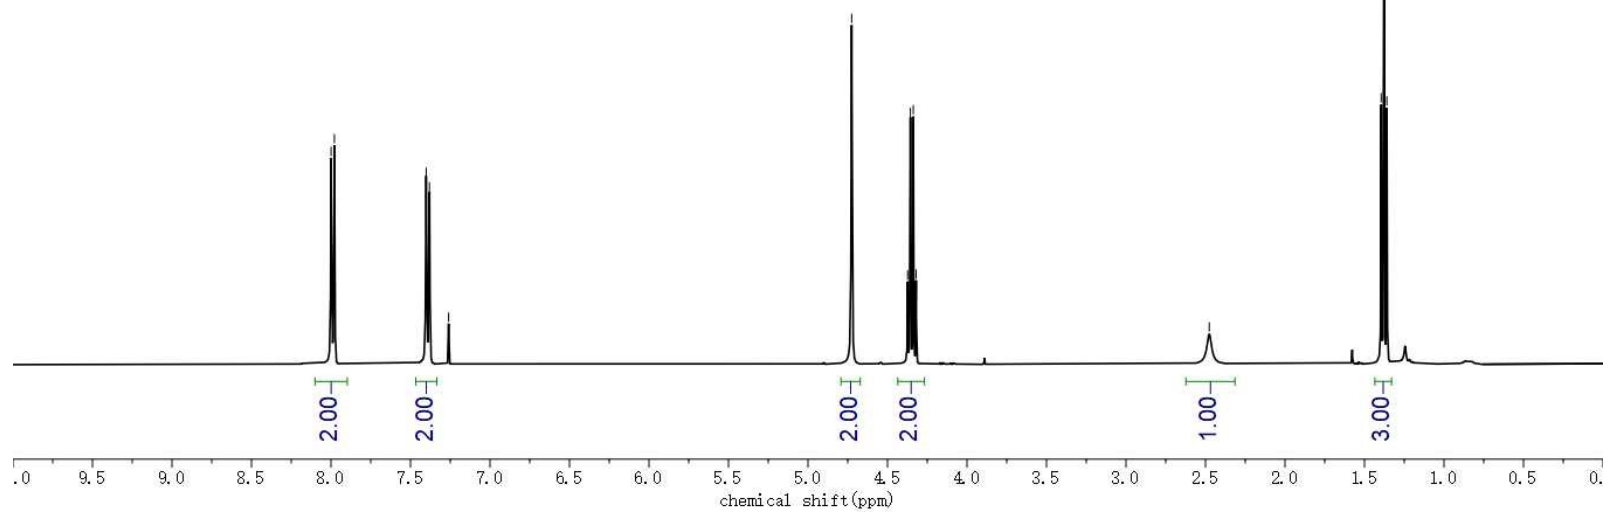

JWJ-2024-170

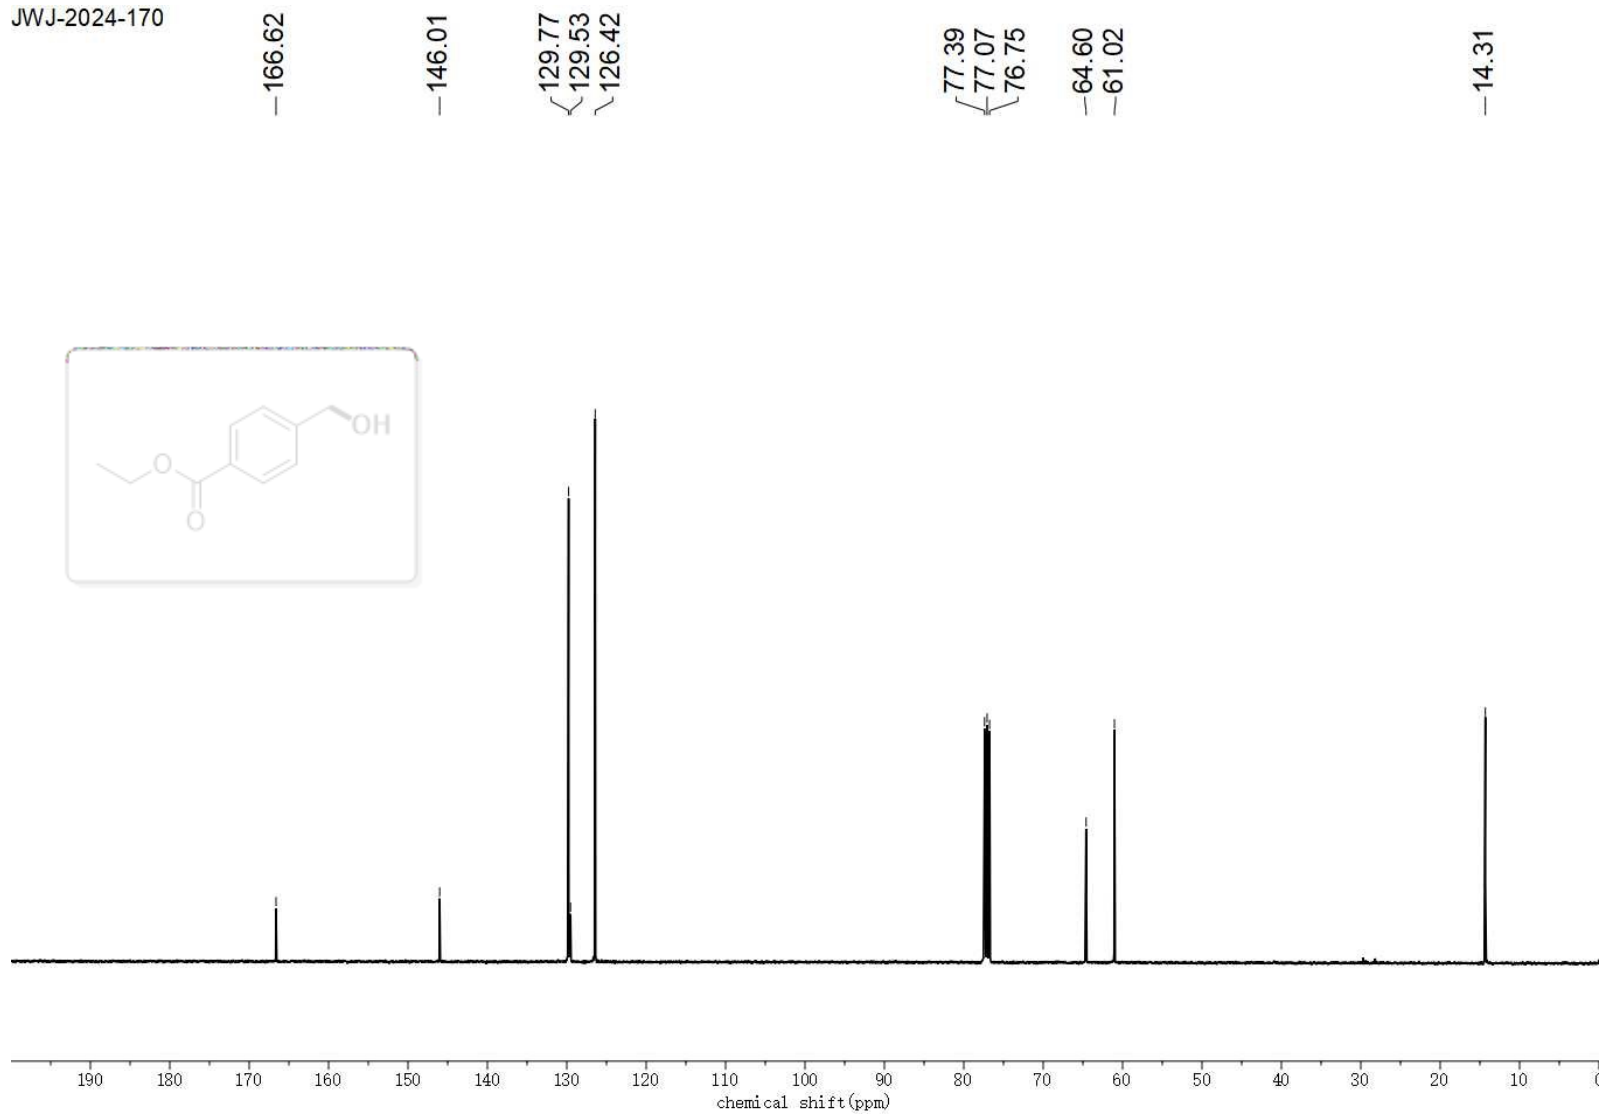

JWJ-2024-340

7.9899  
7.9694  
7.4221  
7.4037  
7.2598

4.9552  
4.9390  
4.9228  
4.9065

3.8889

2.2077

1.4869  
1.4708

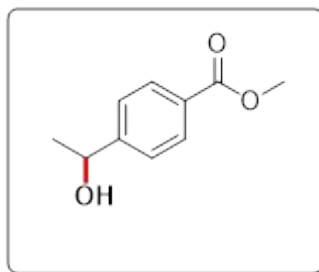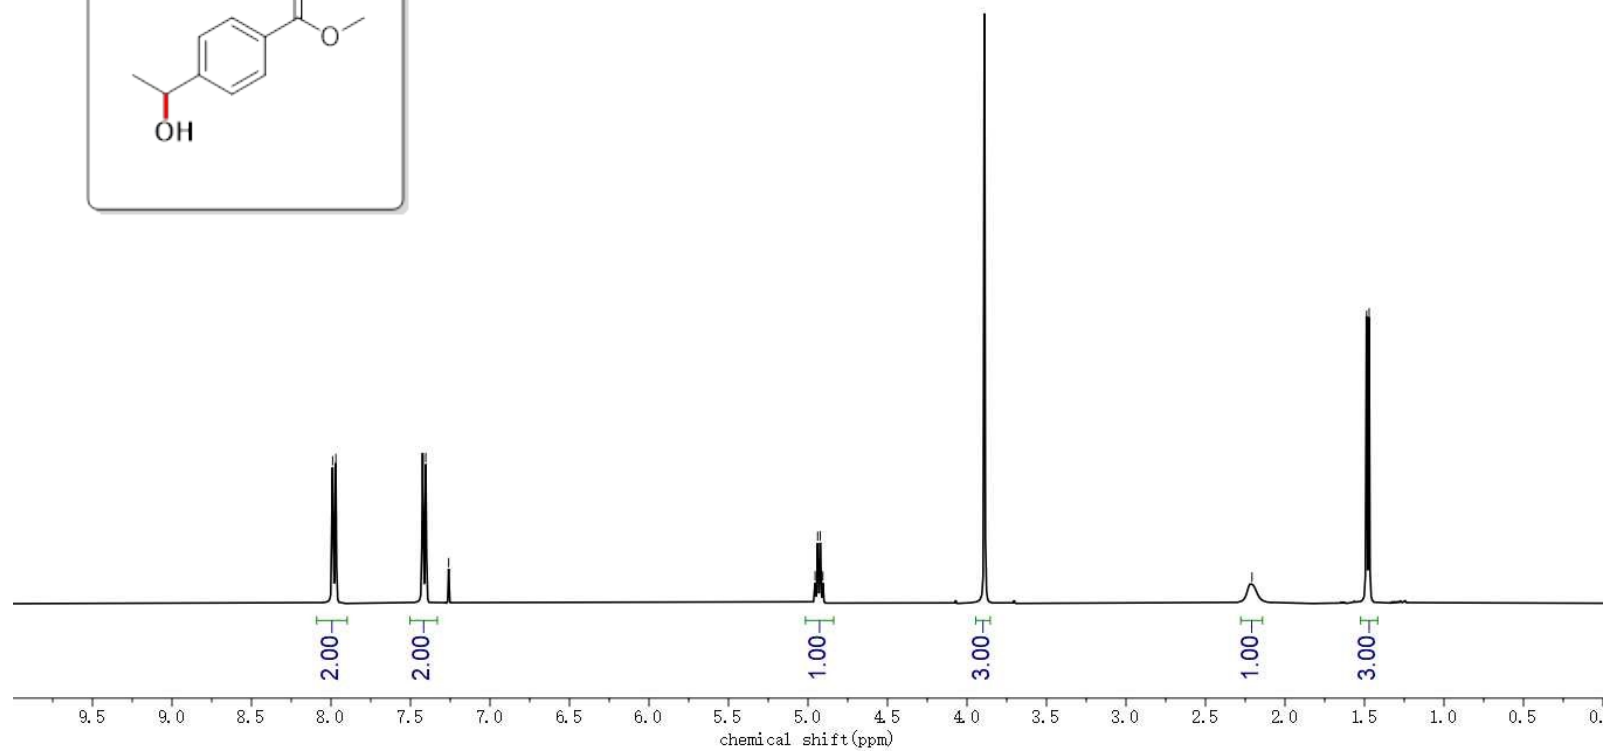

JWJ-2024-340

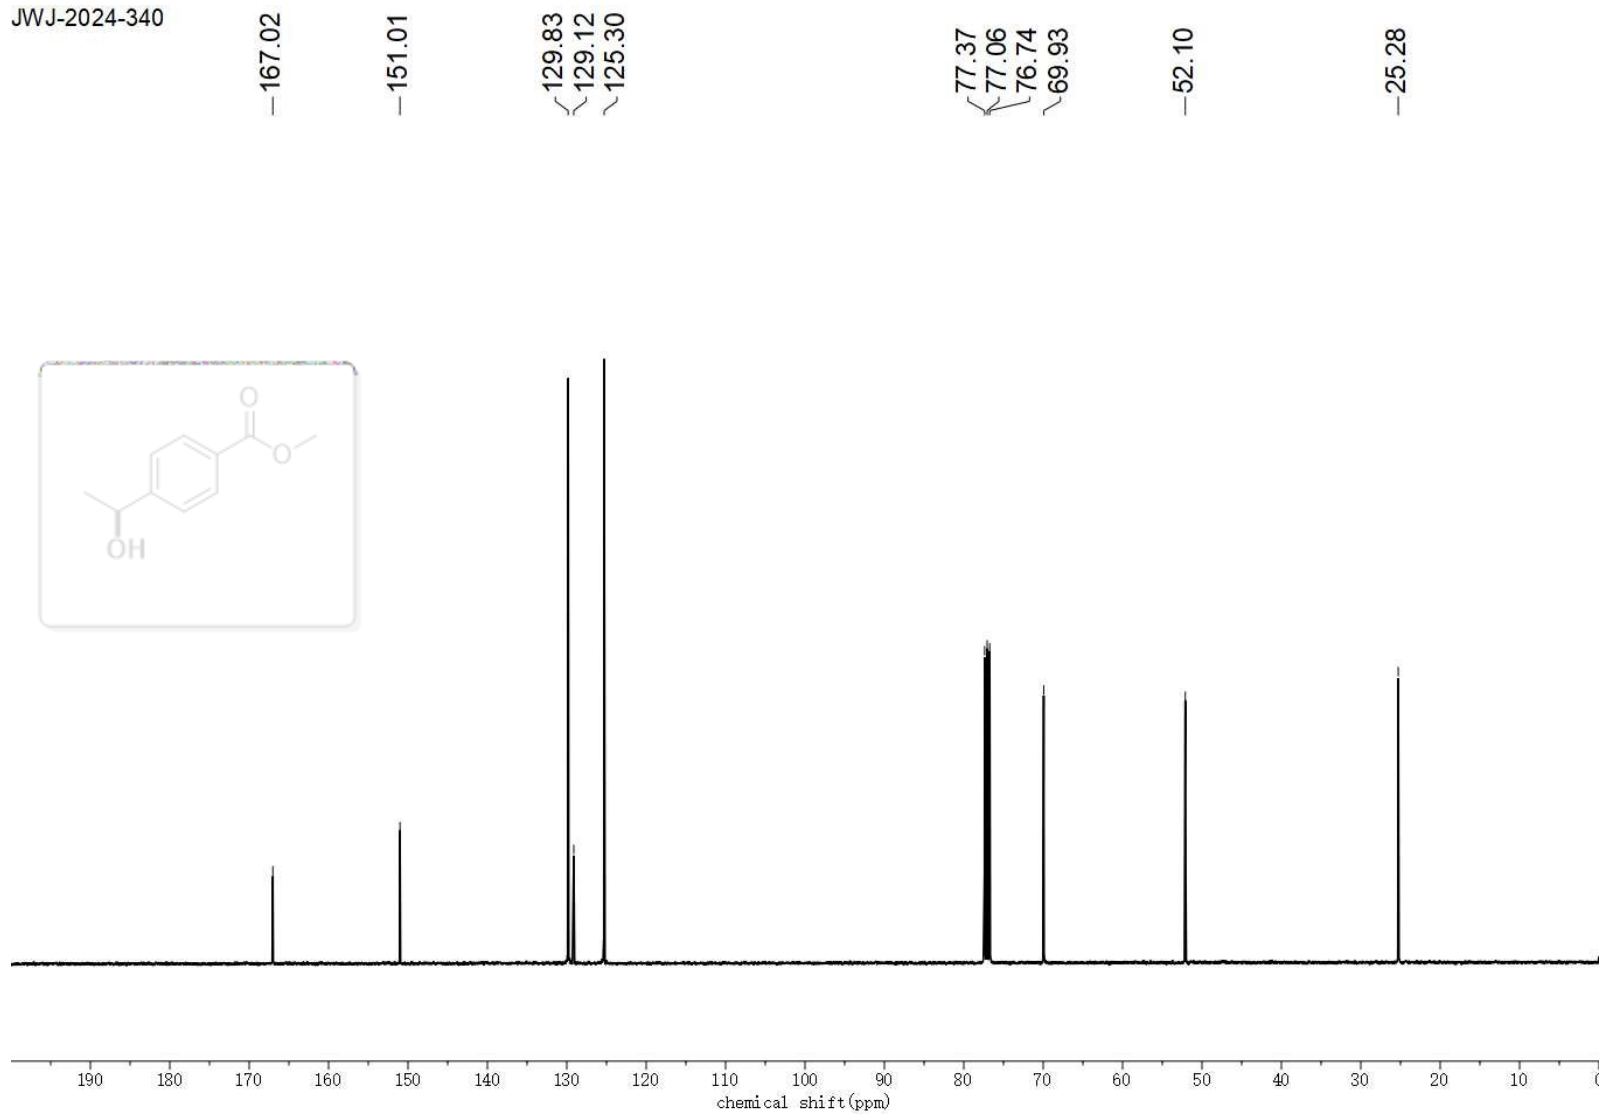

JWJ-2024-342

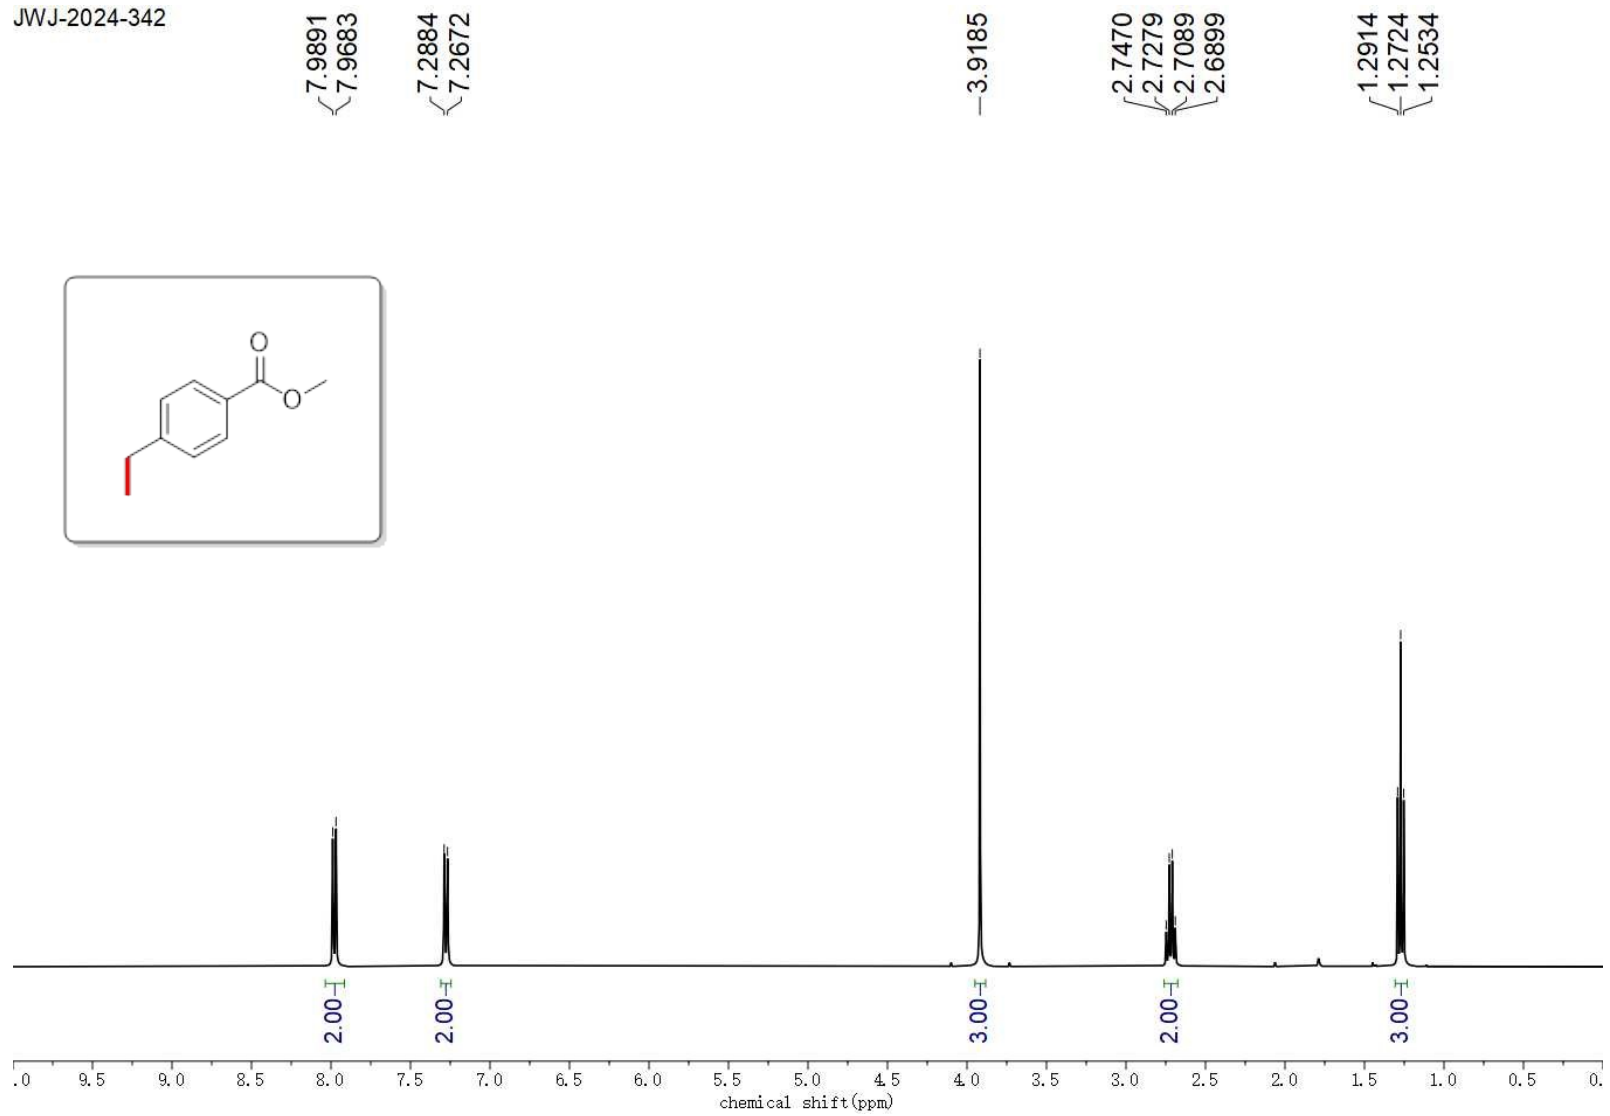

JWJ-2024-342

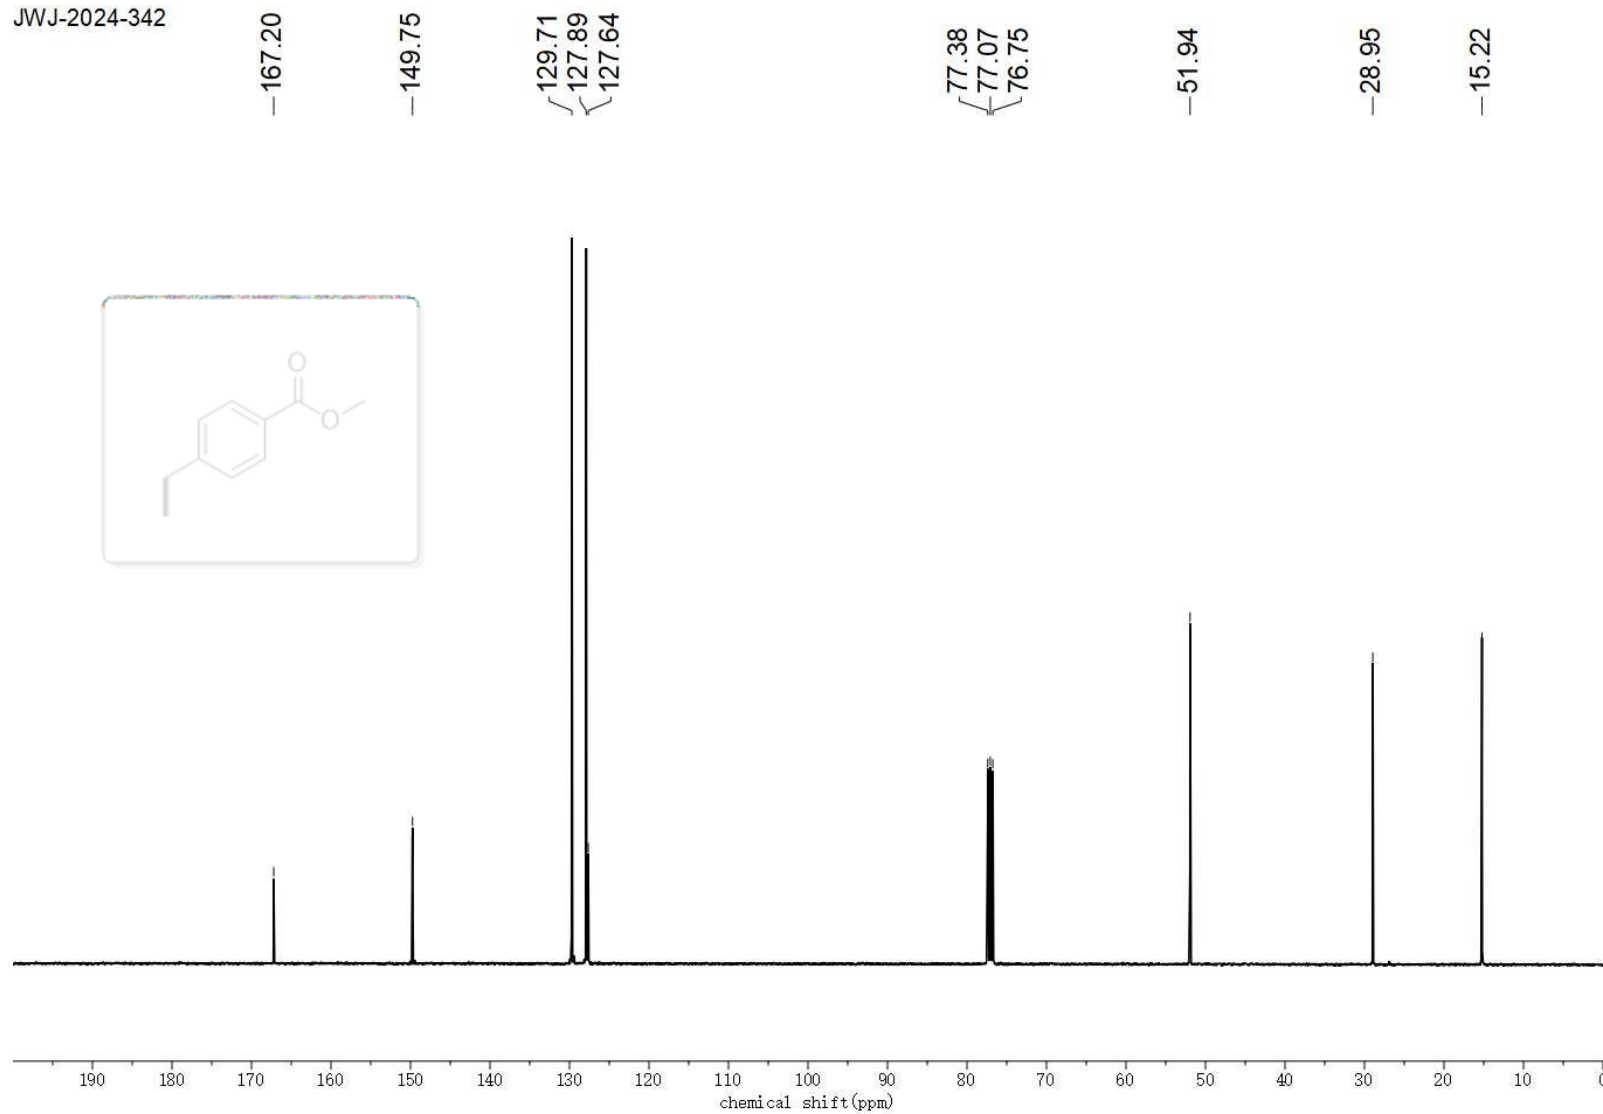

JWJ-2024-339

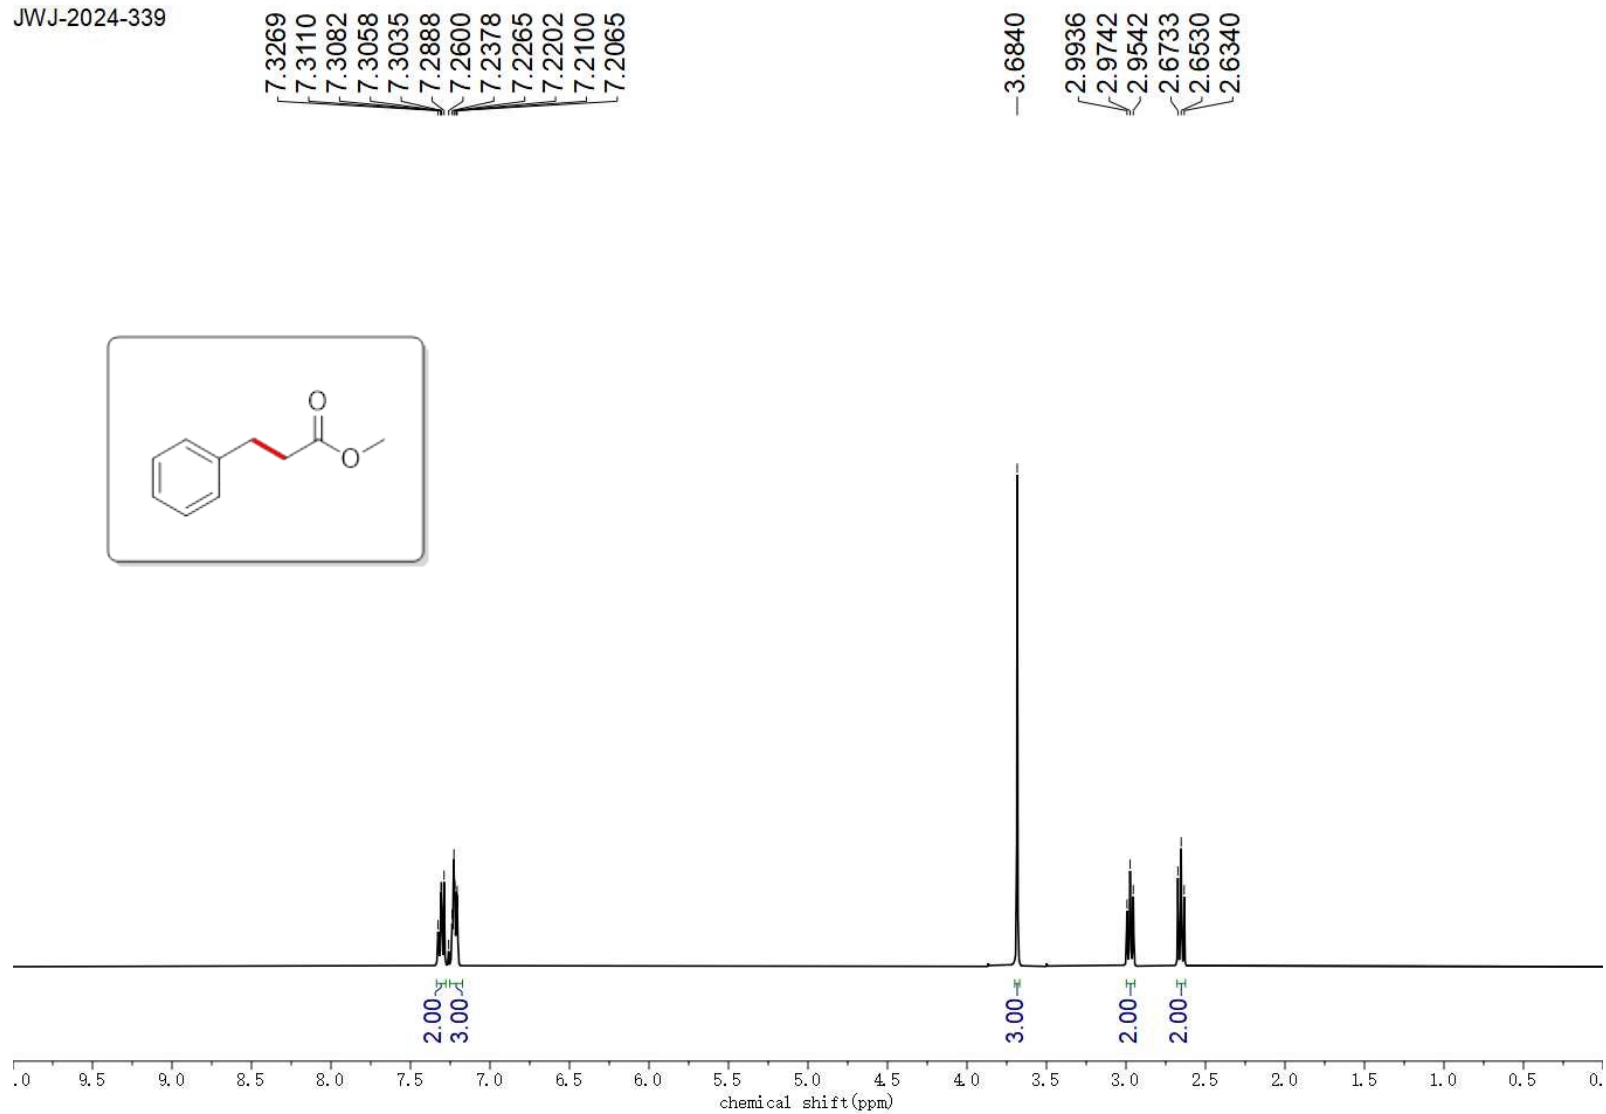

JWJ-2024-339

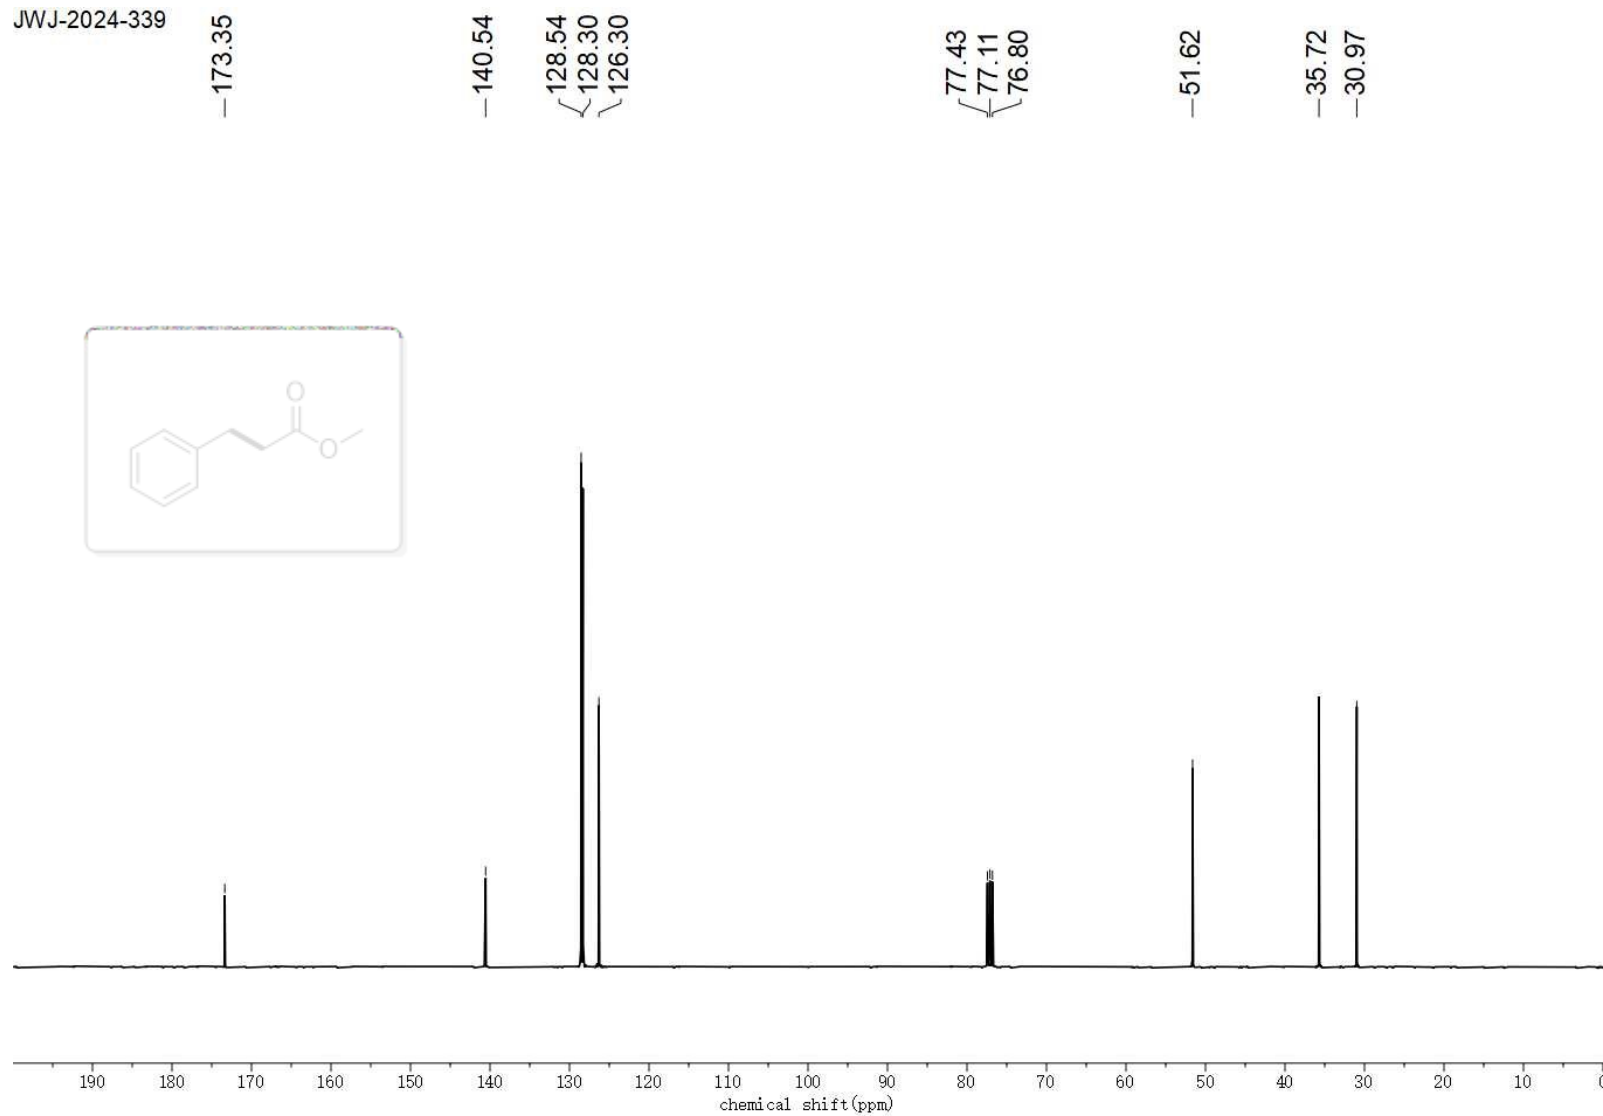



JWJ-2024-337

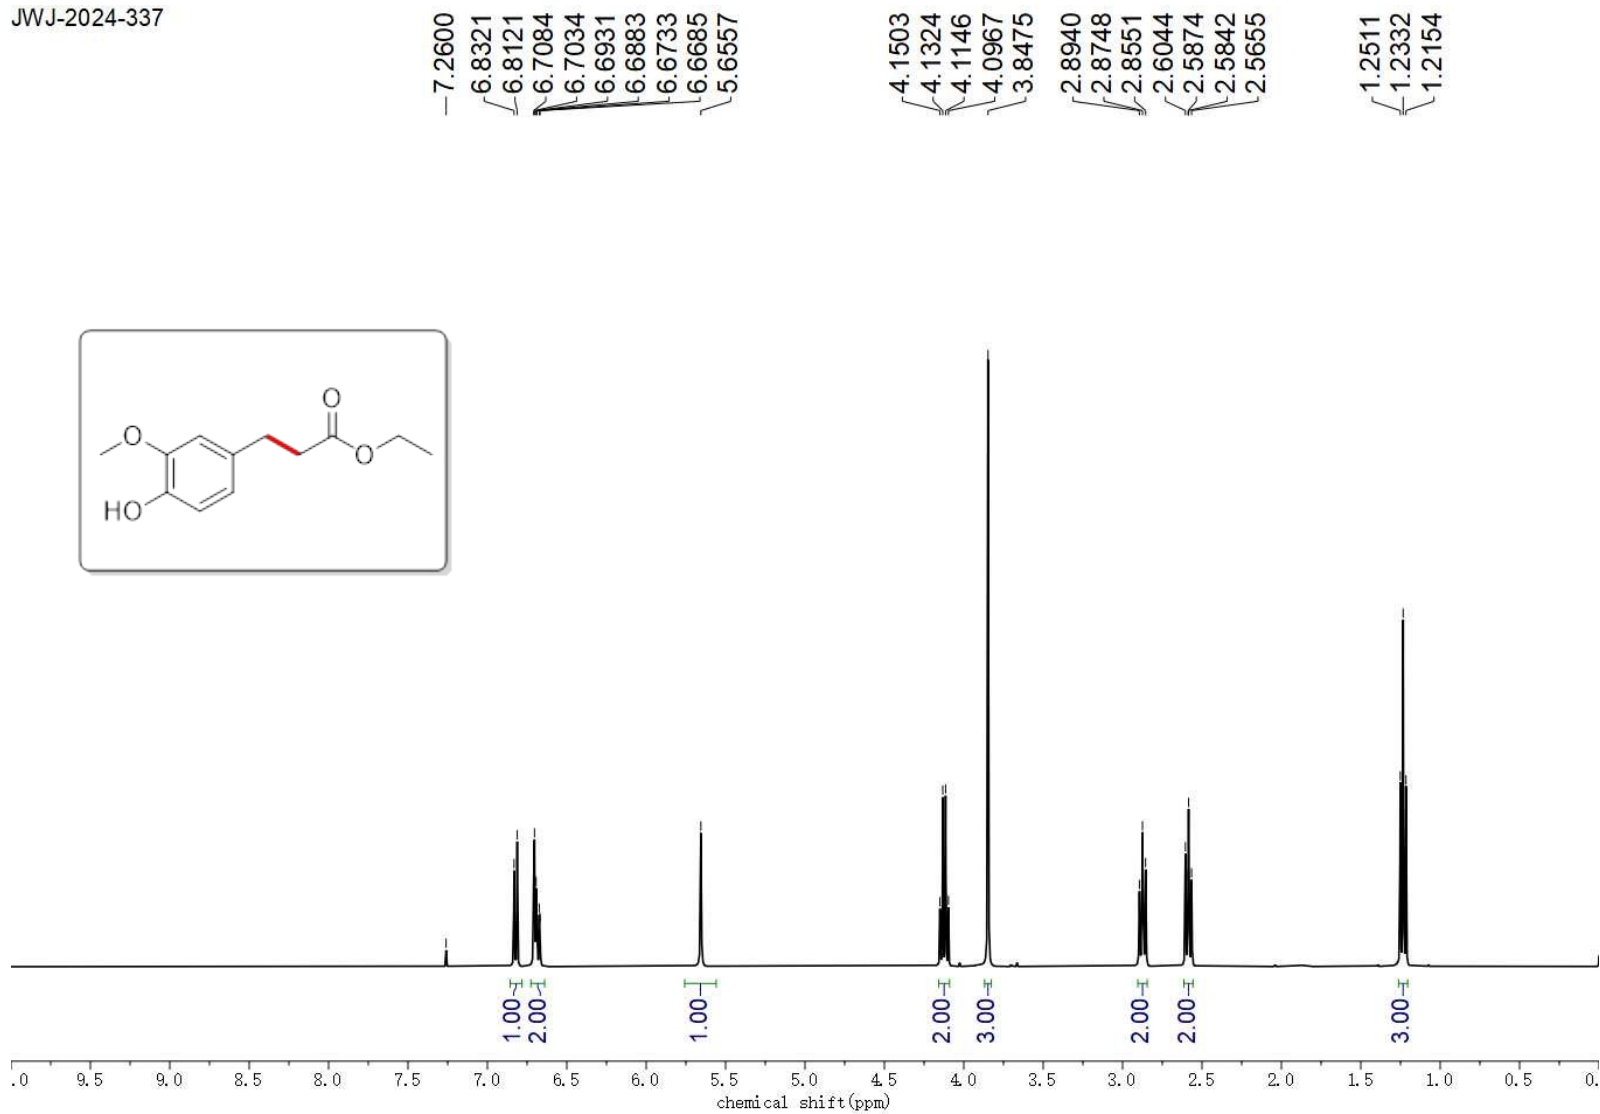

JWJ-2024-337

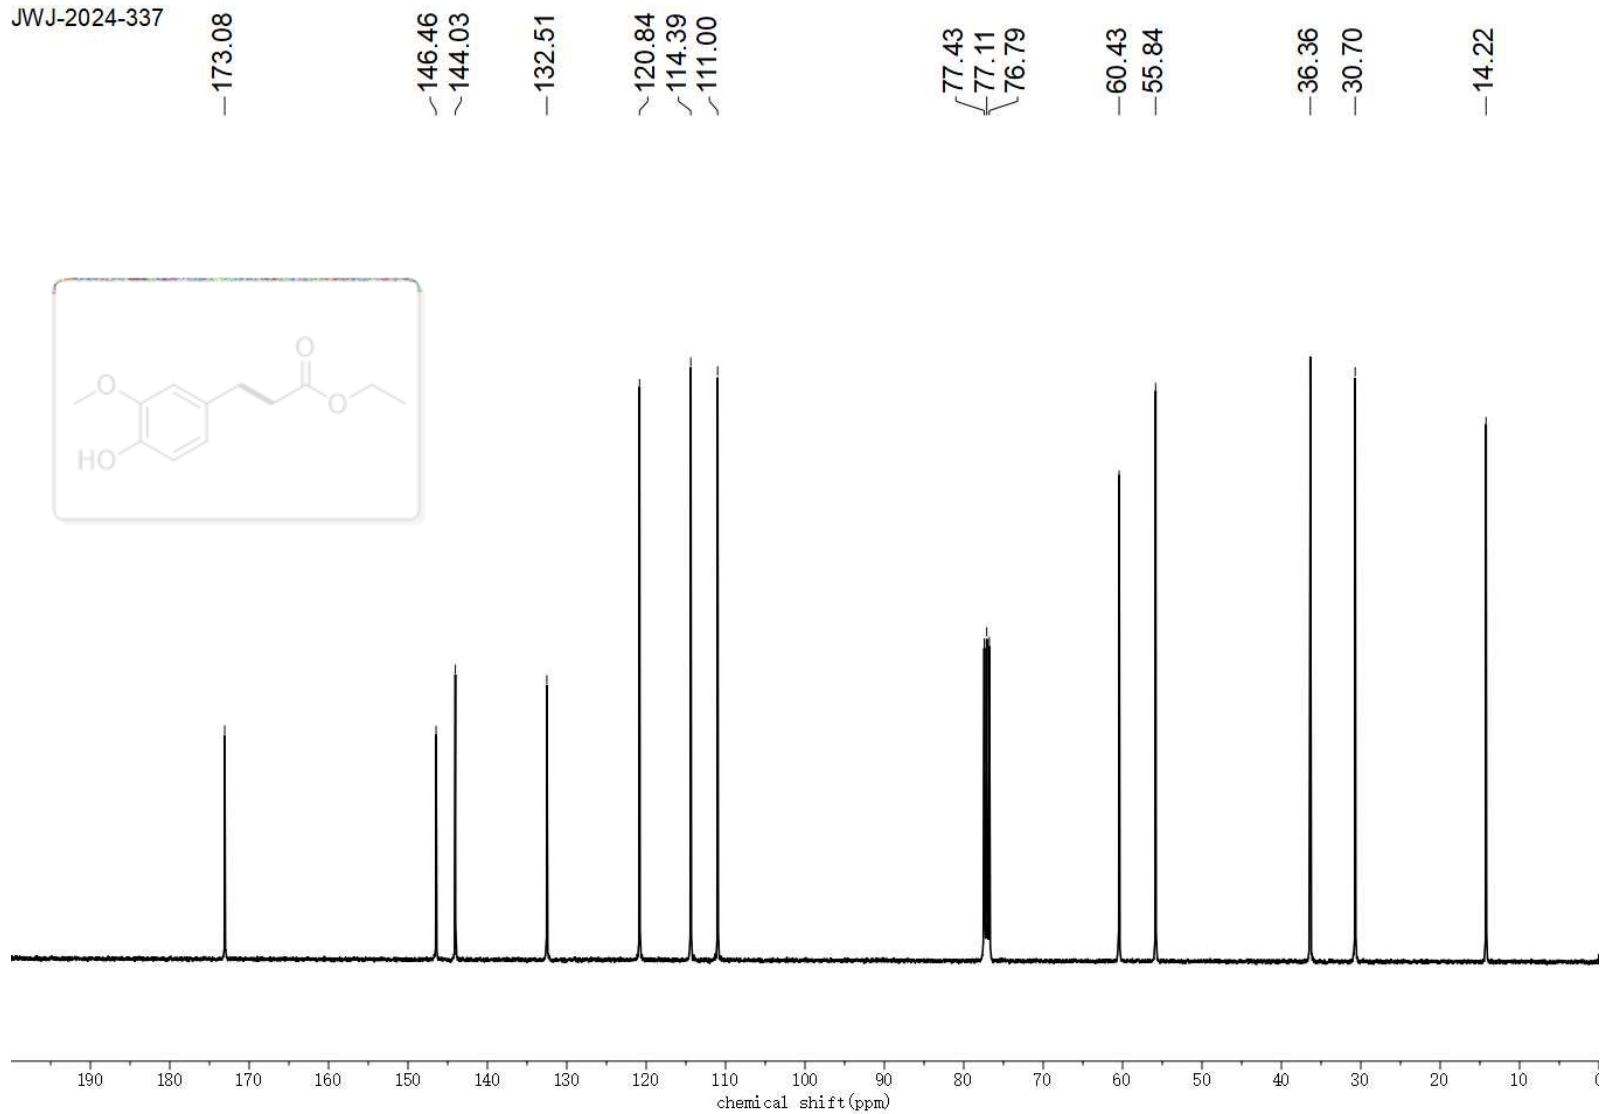

JWJ-2024-343

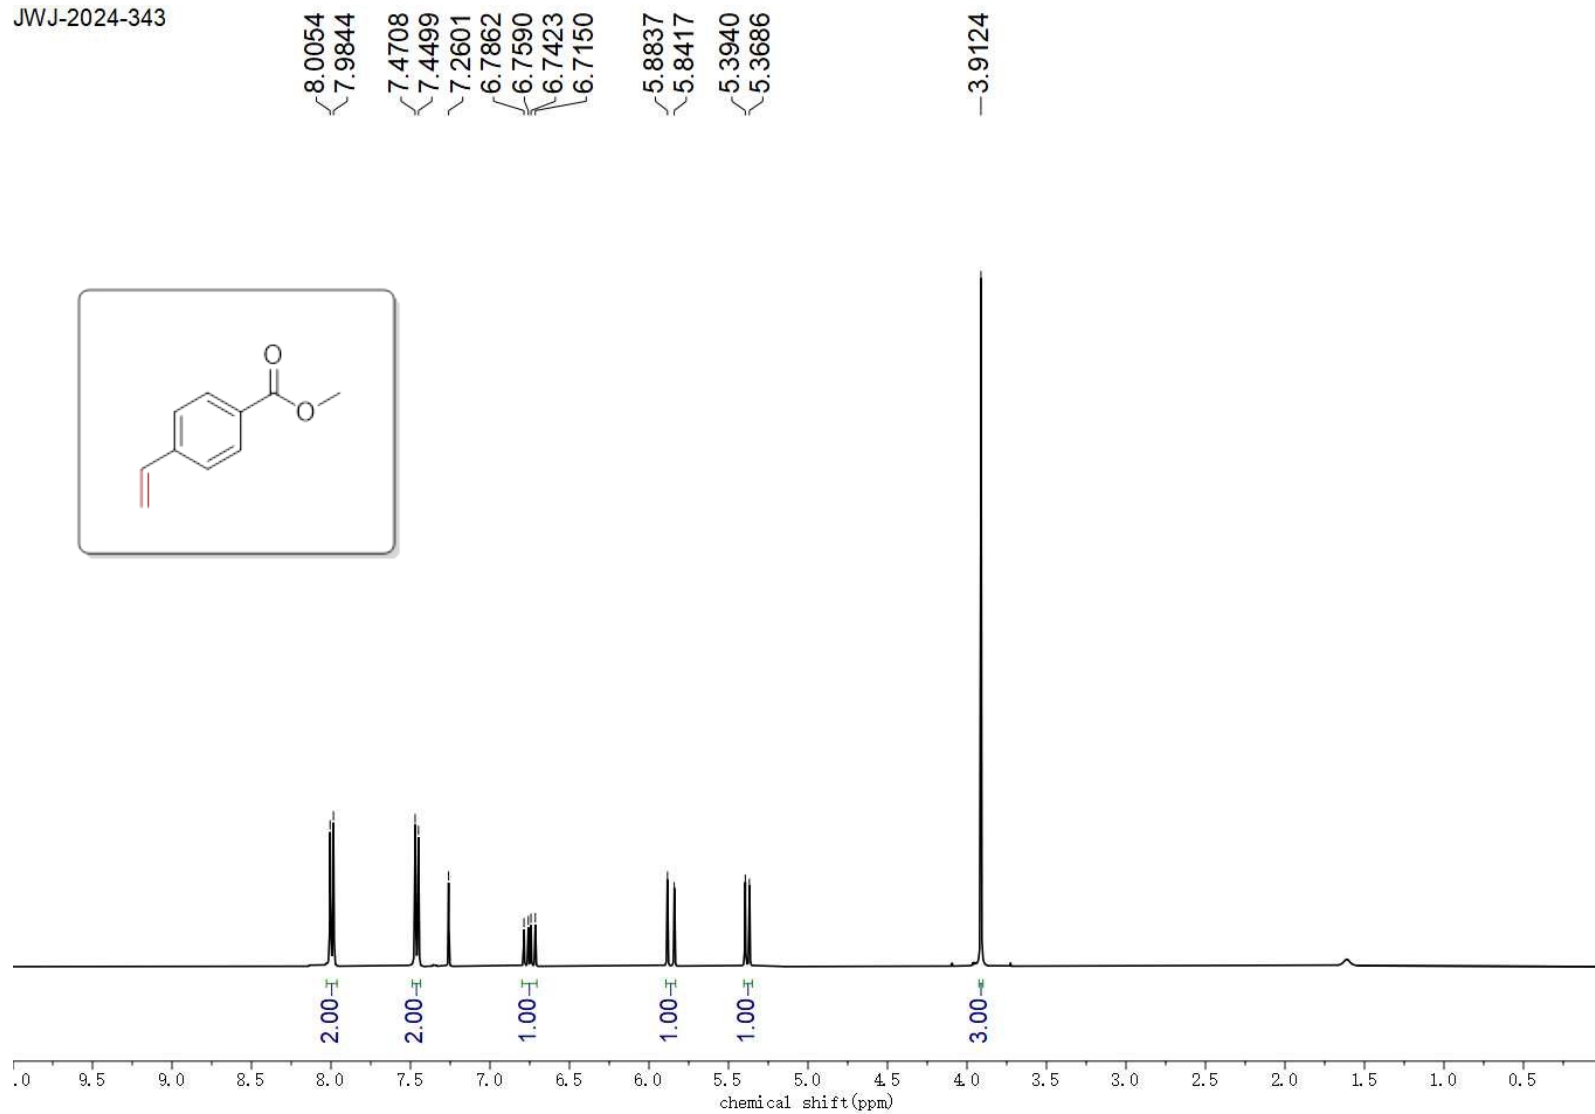

JWJ-2024-343

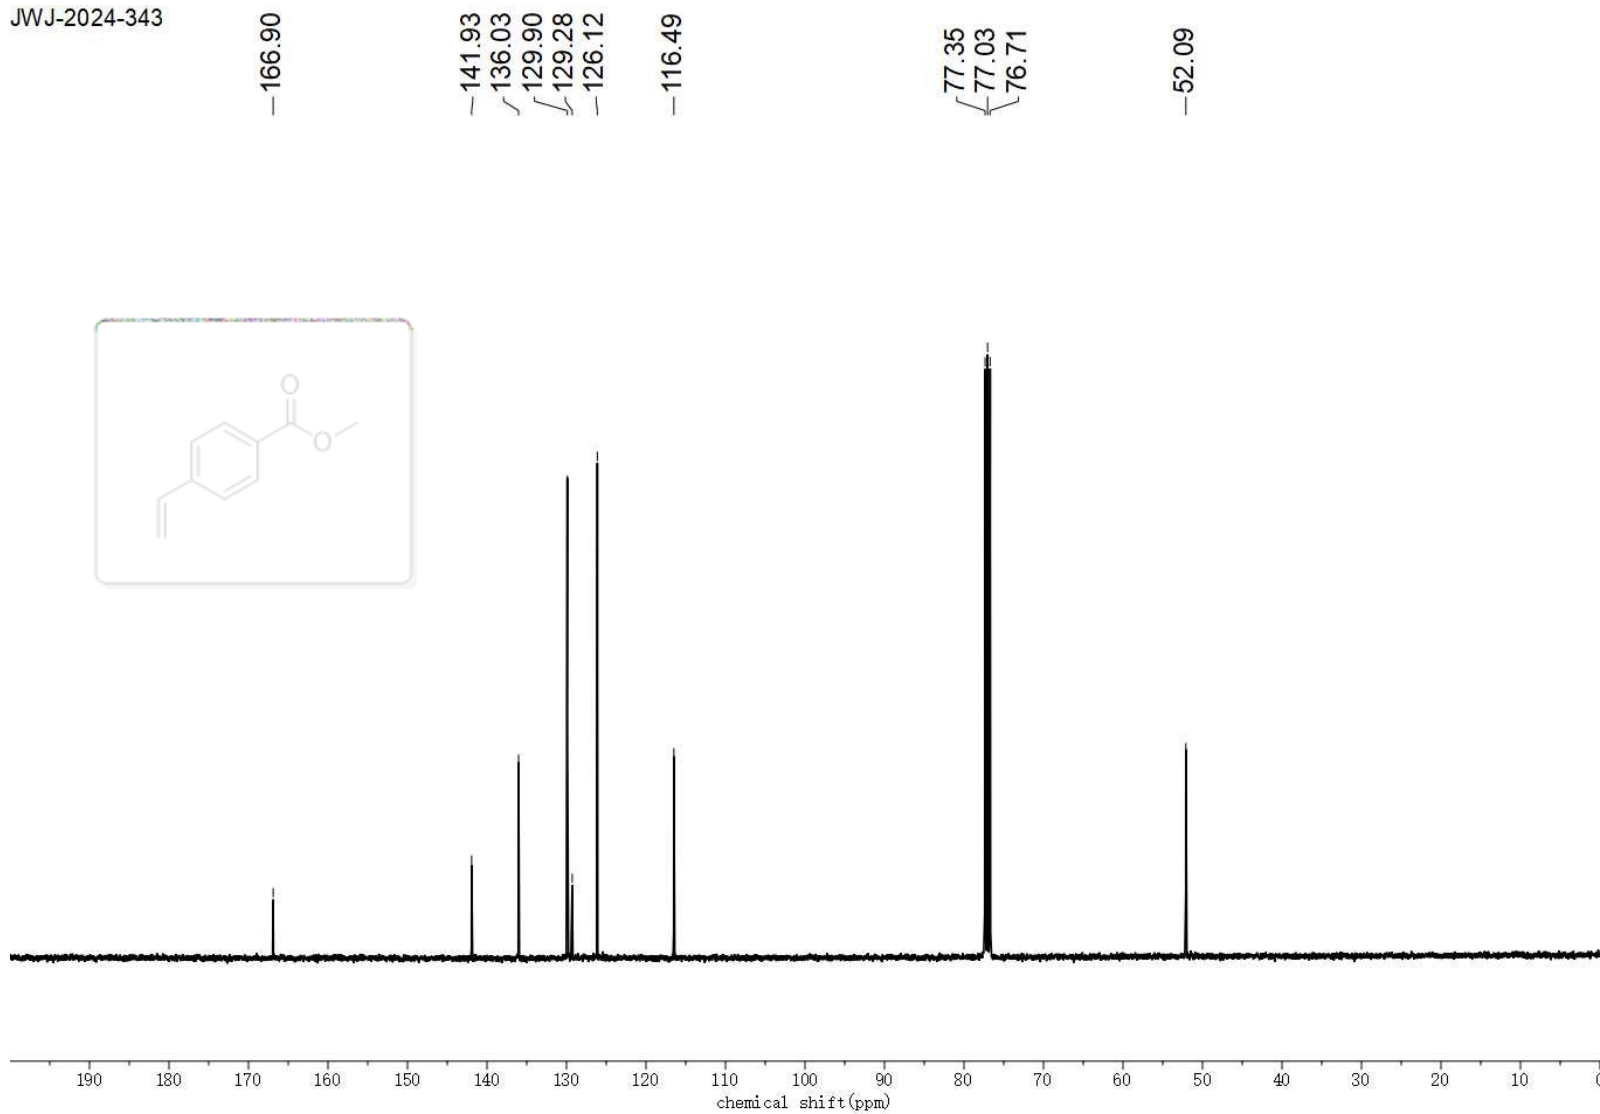

JWJ-2024-353

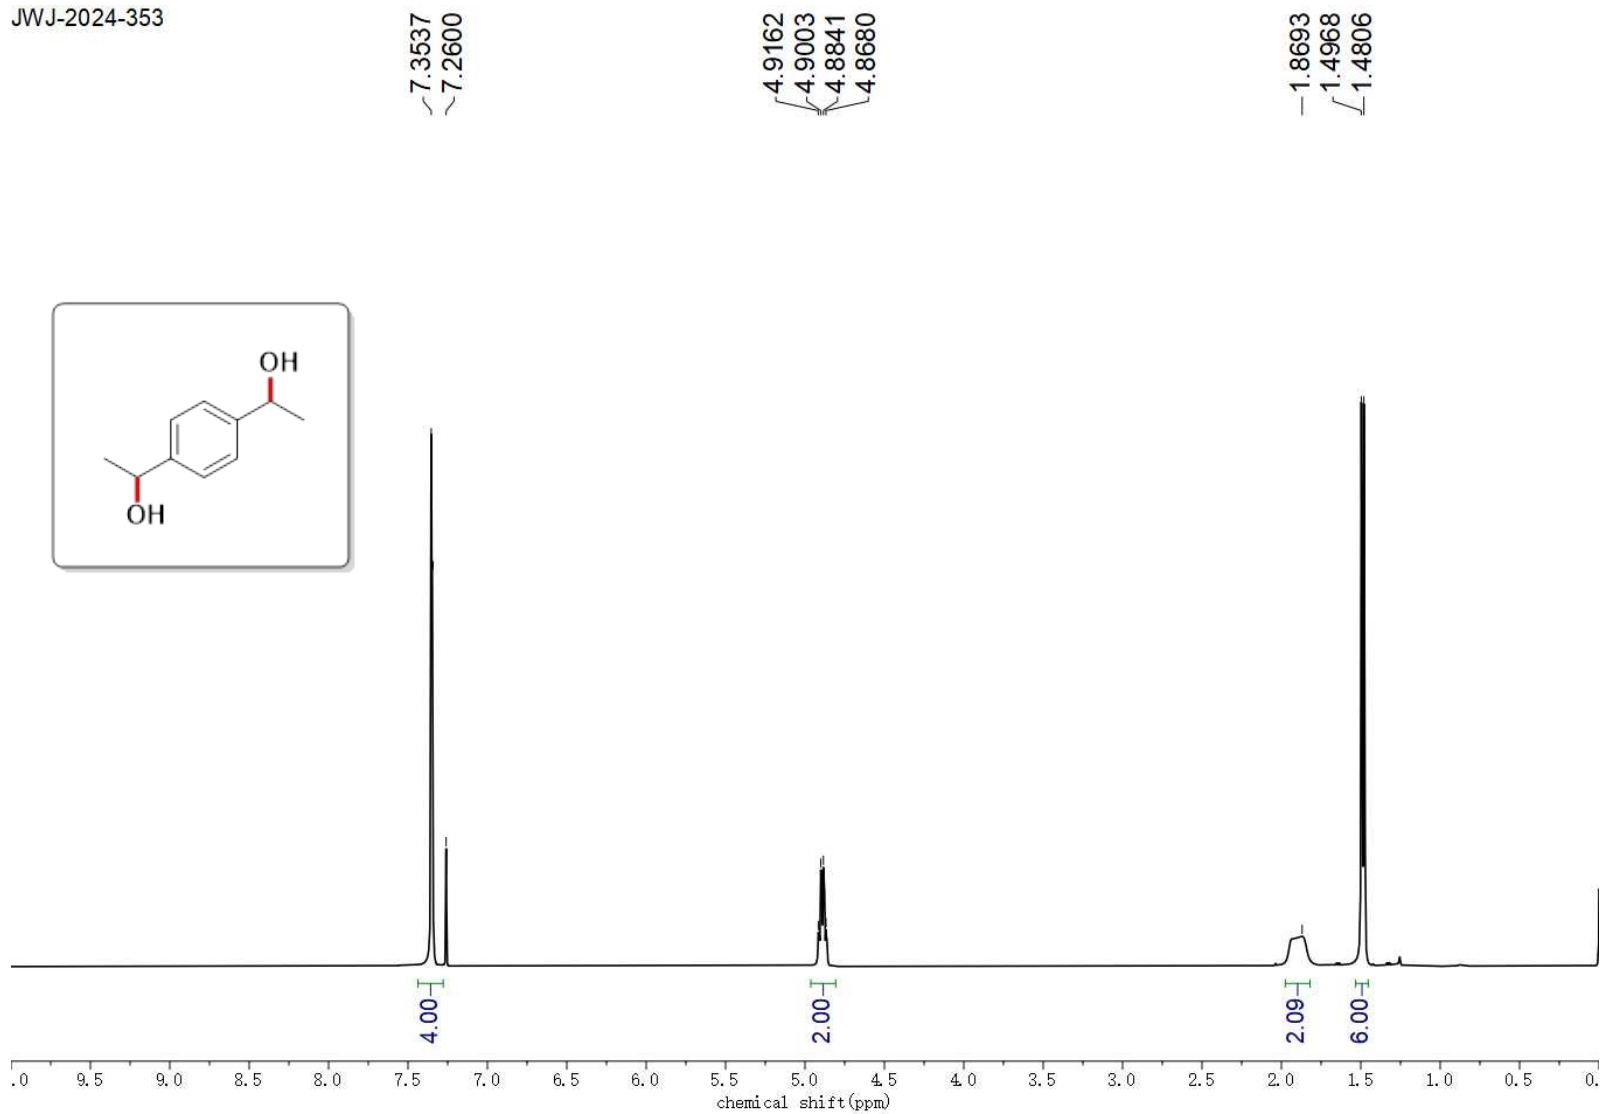

JWJ-2024-353

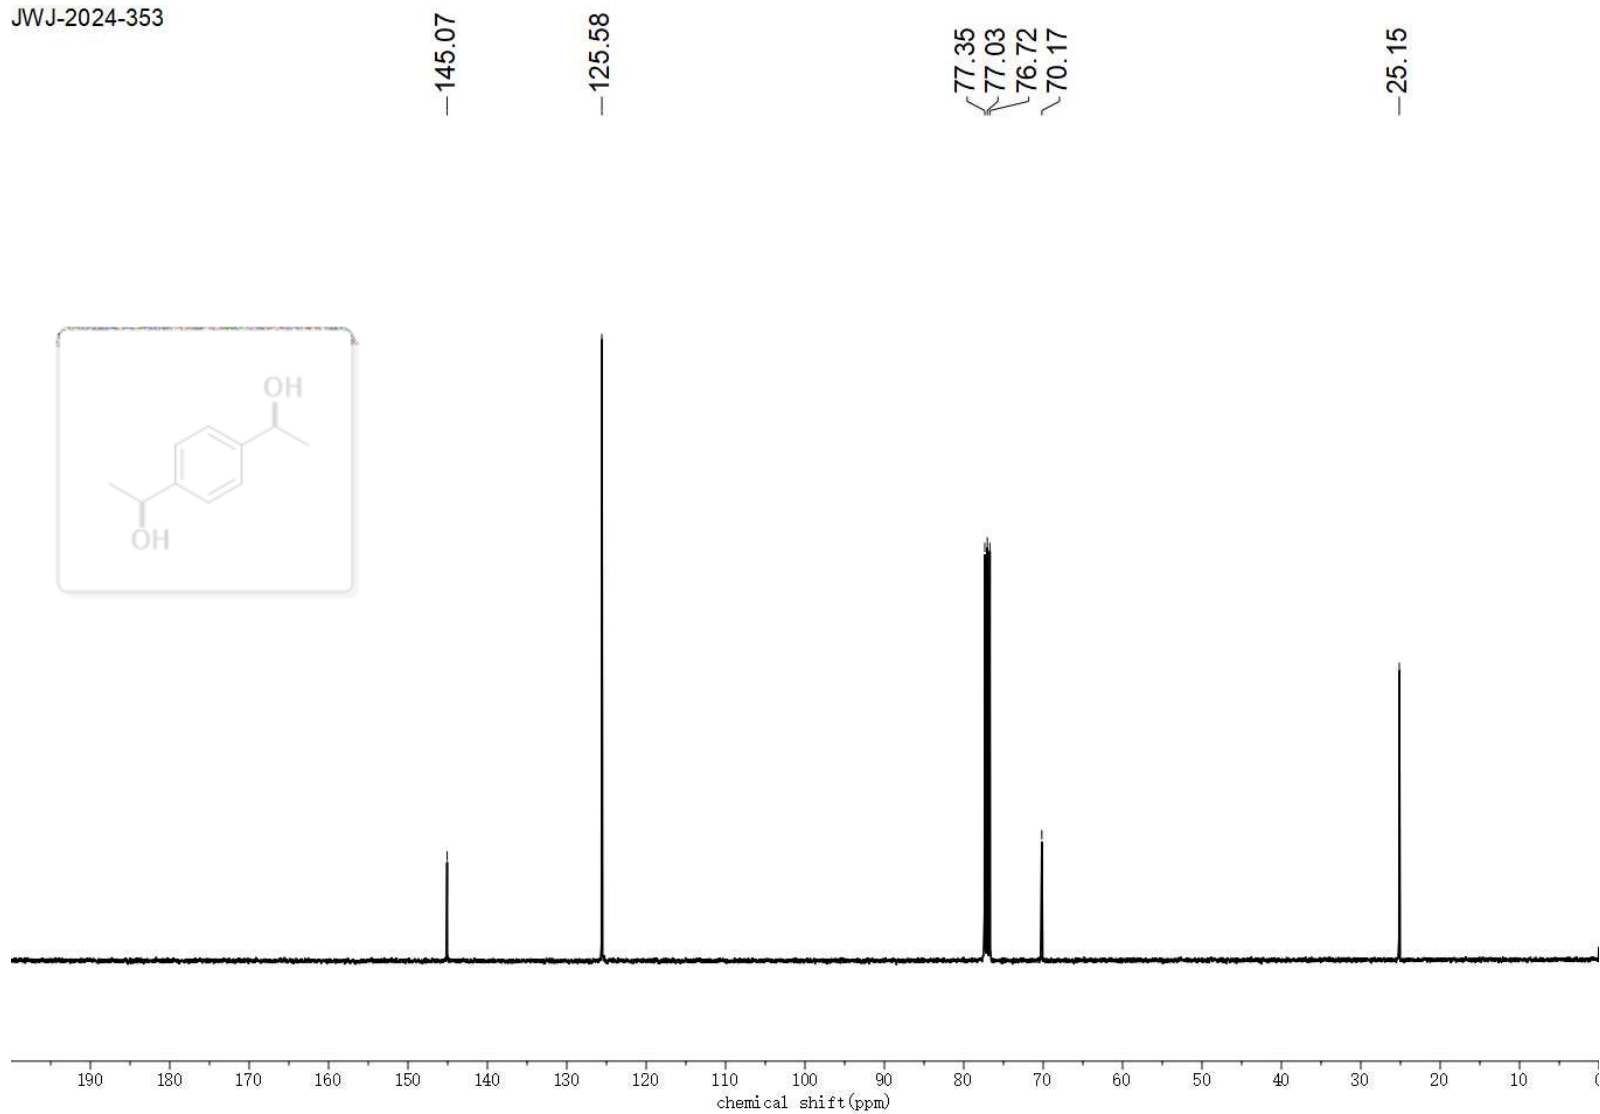

JWJ-2024-430

7.9198  
7.8989  
7.4357  
7.4156  
7.2602

4.7457

2.5738  
2.4283

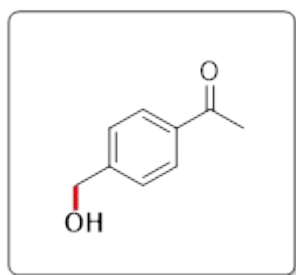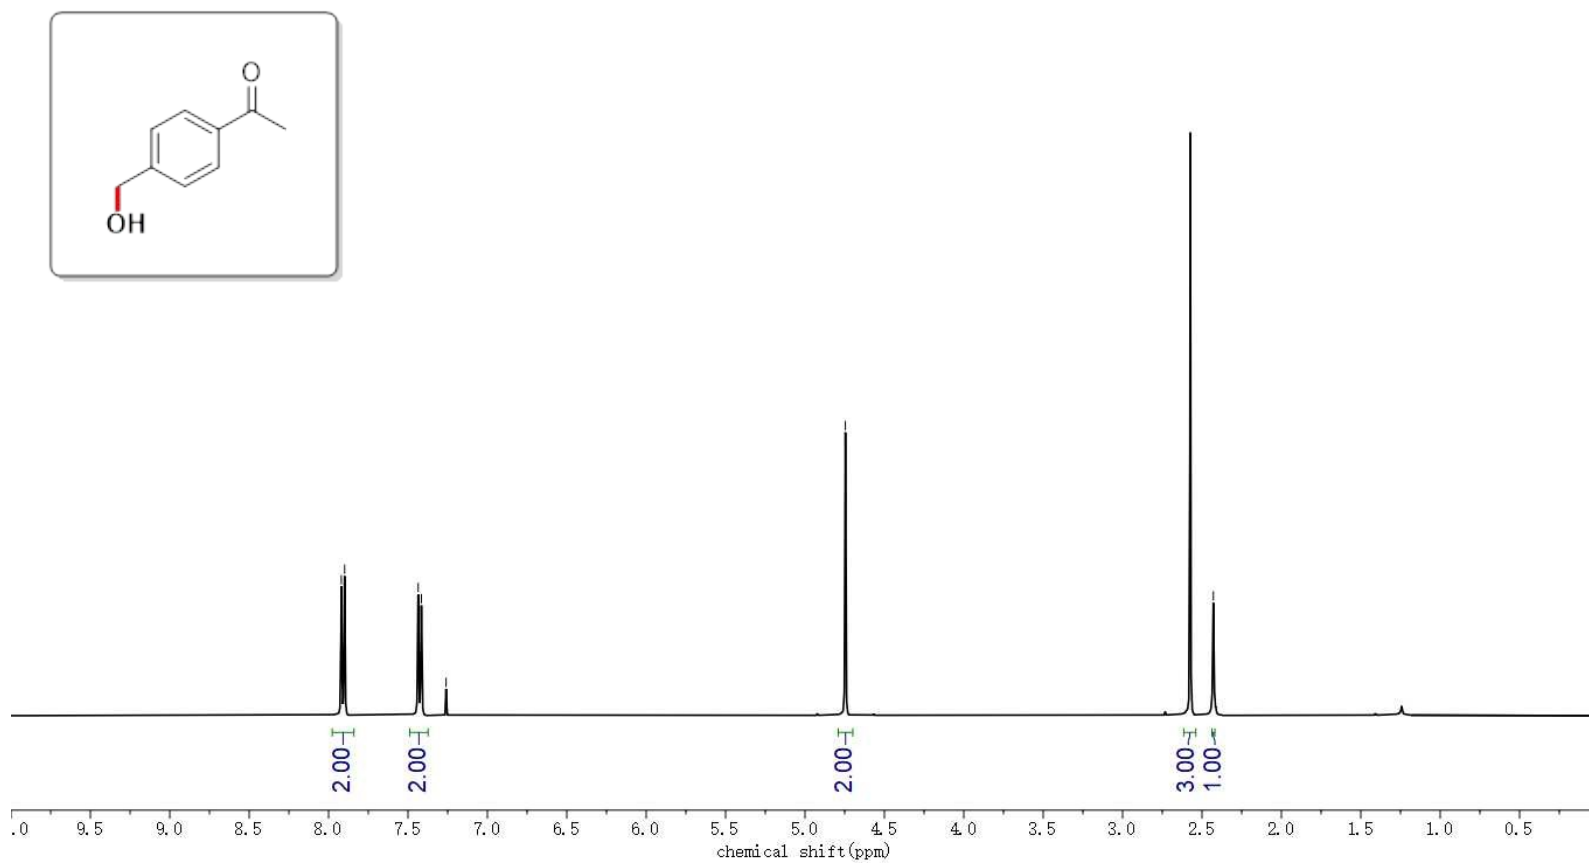

JWJ-2024-430

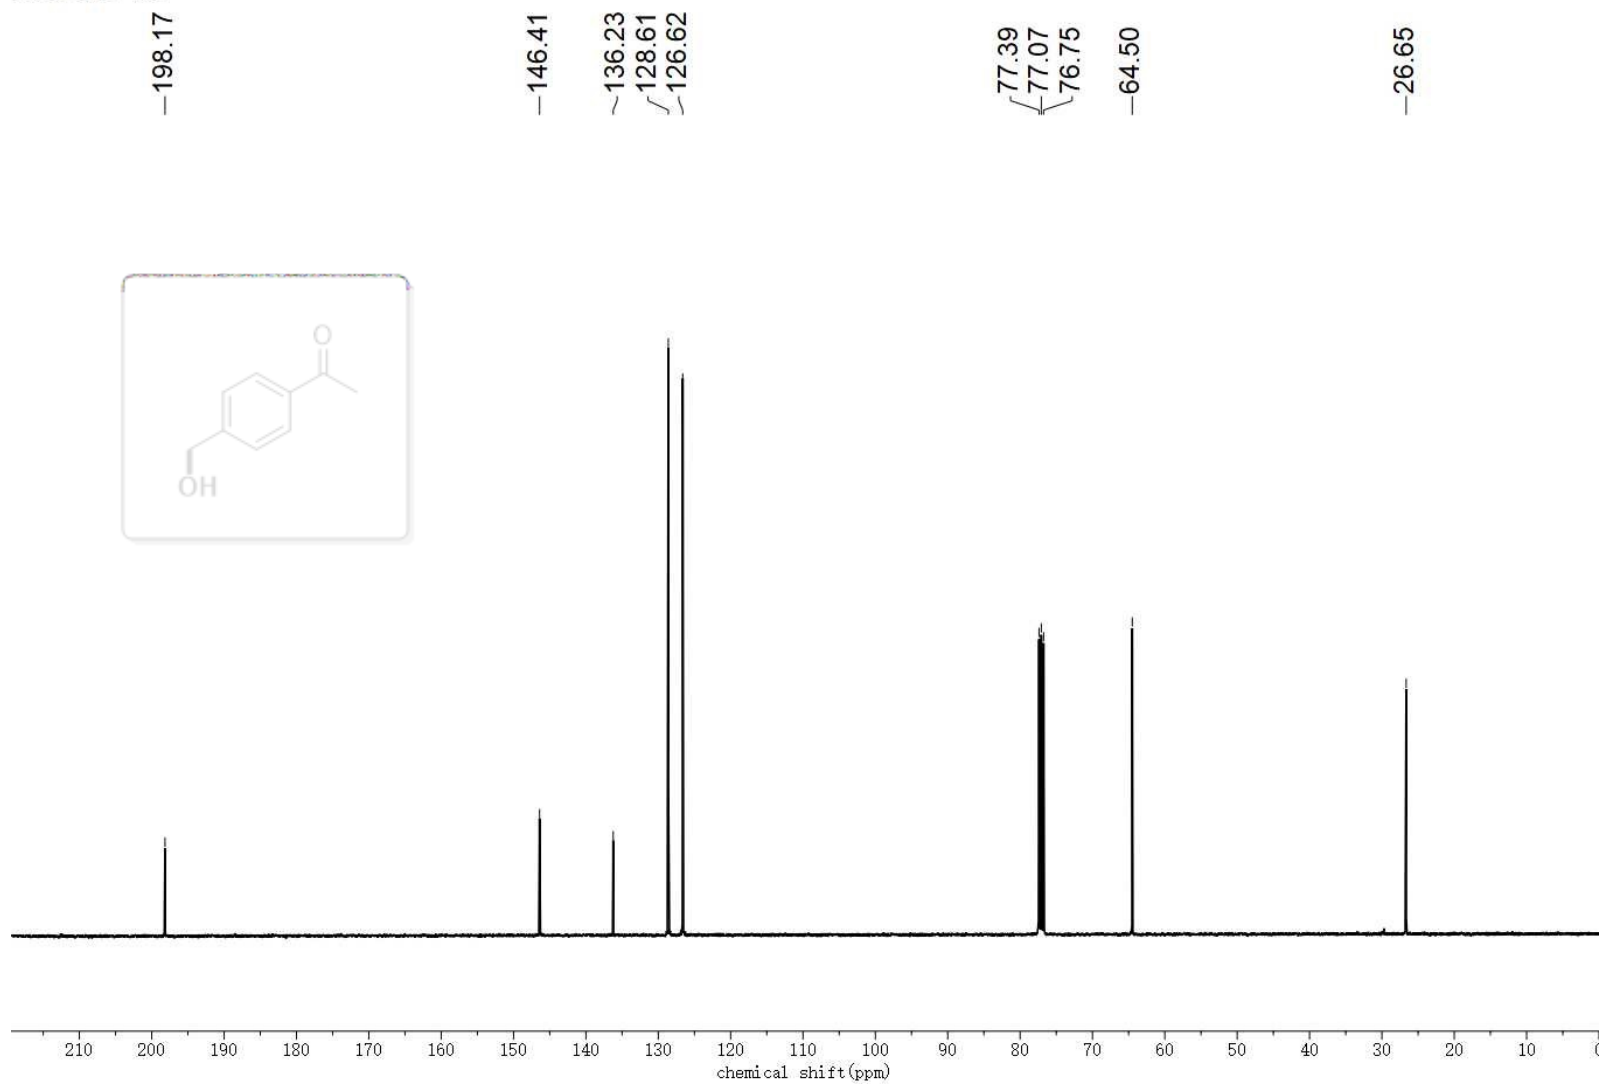



JWJ-2024-369

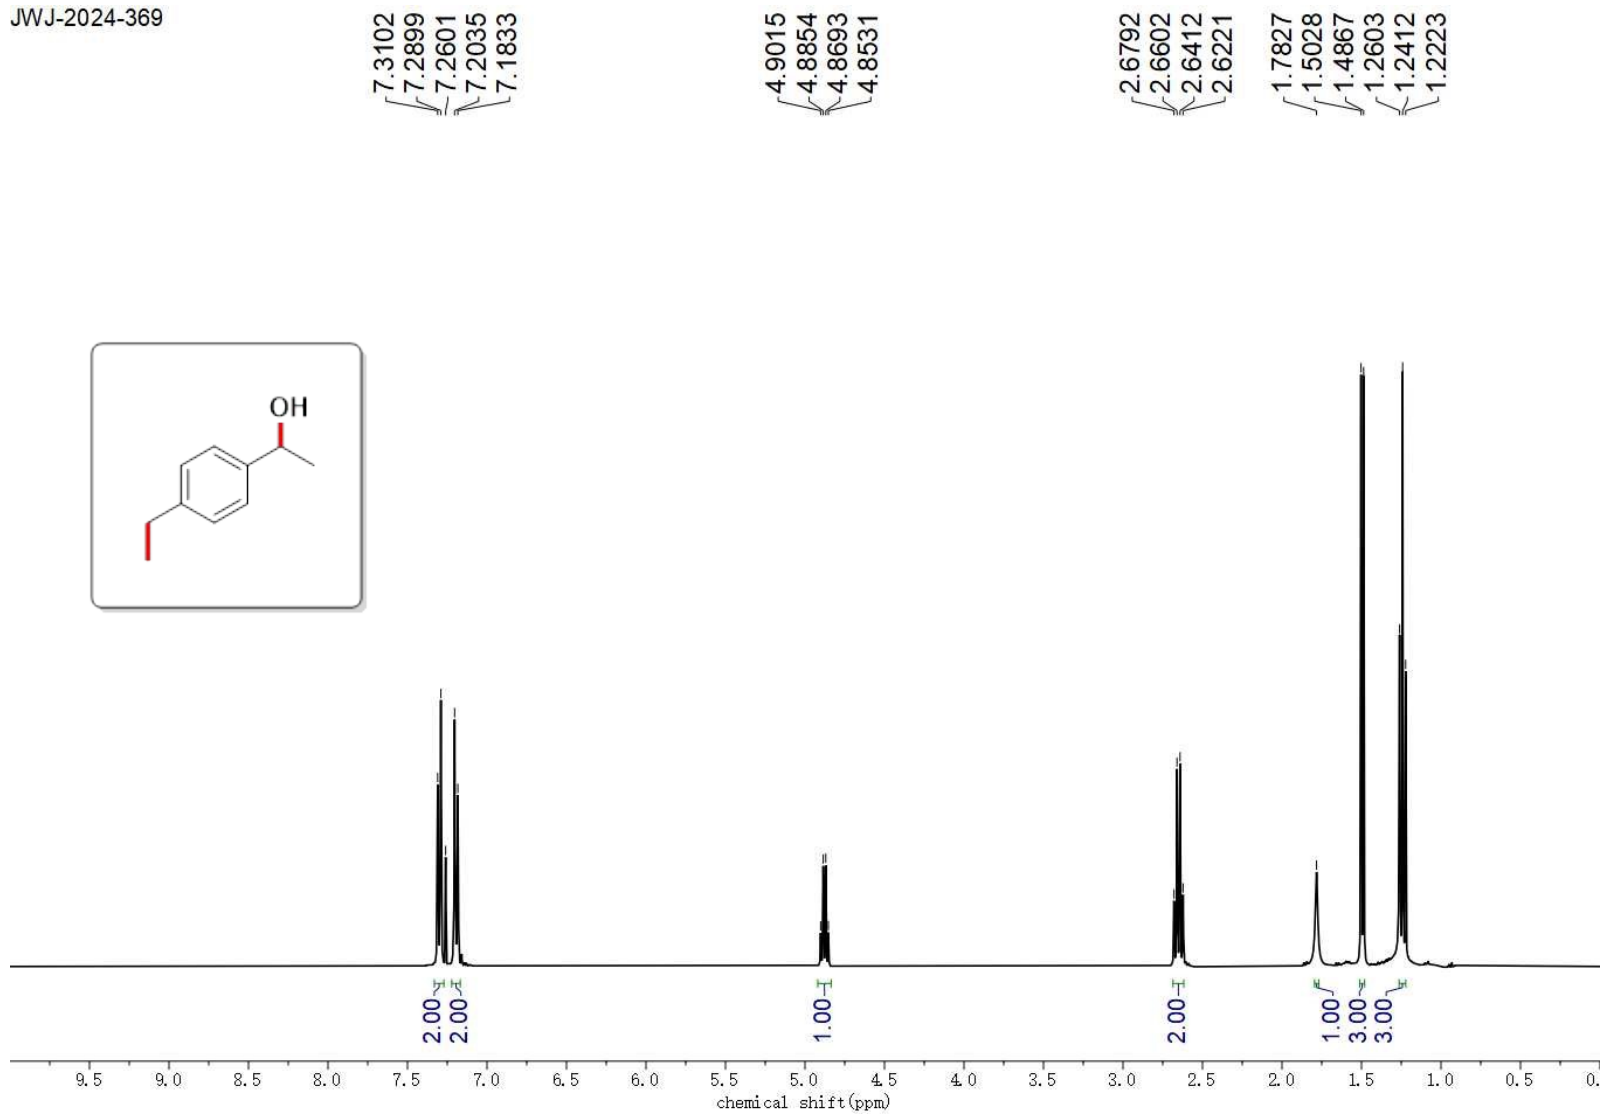

JWJ-2024-369

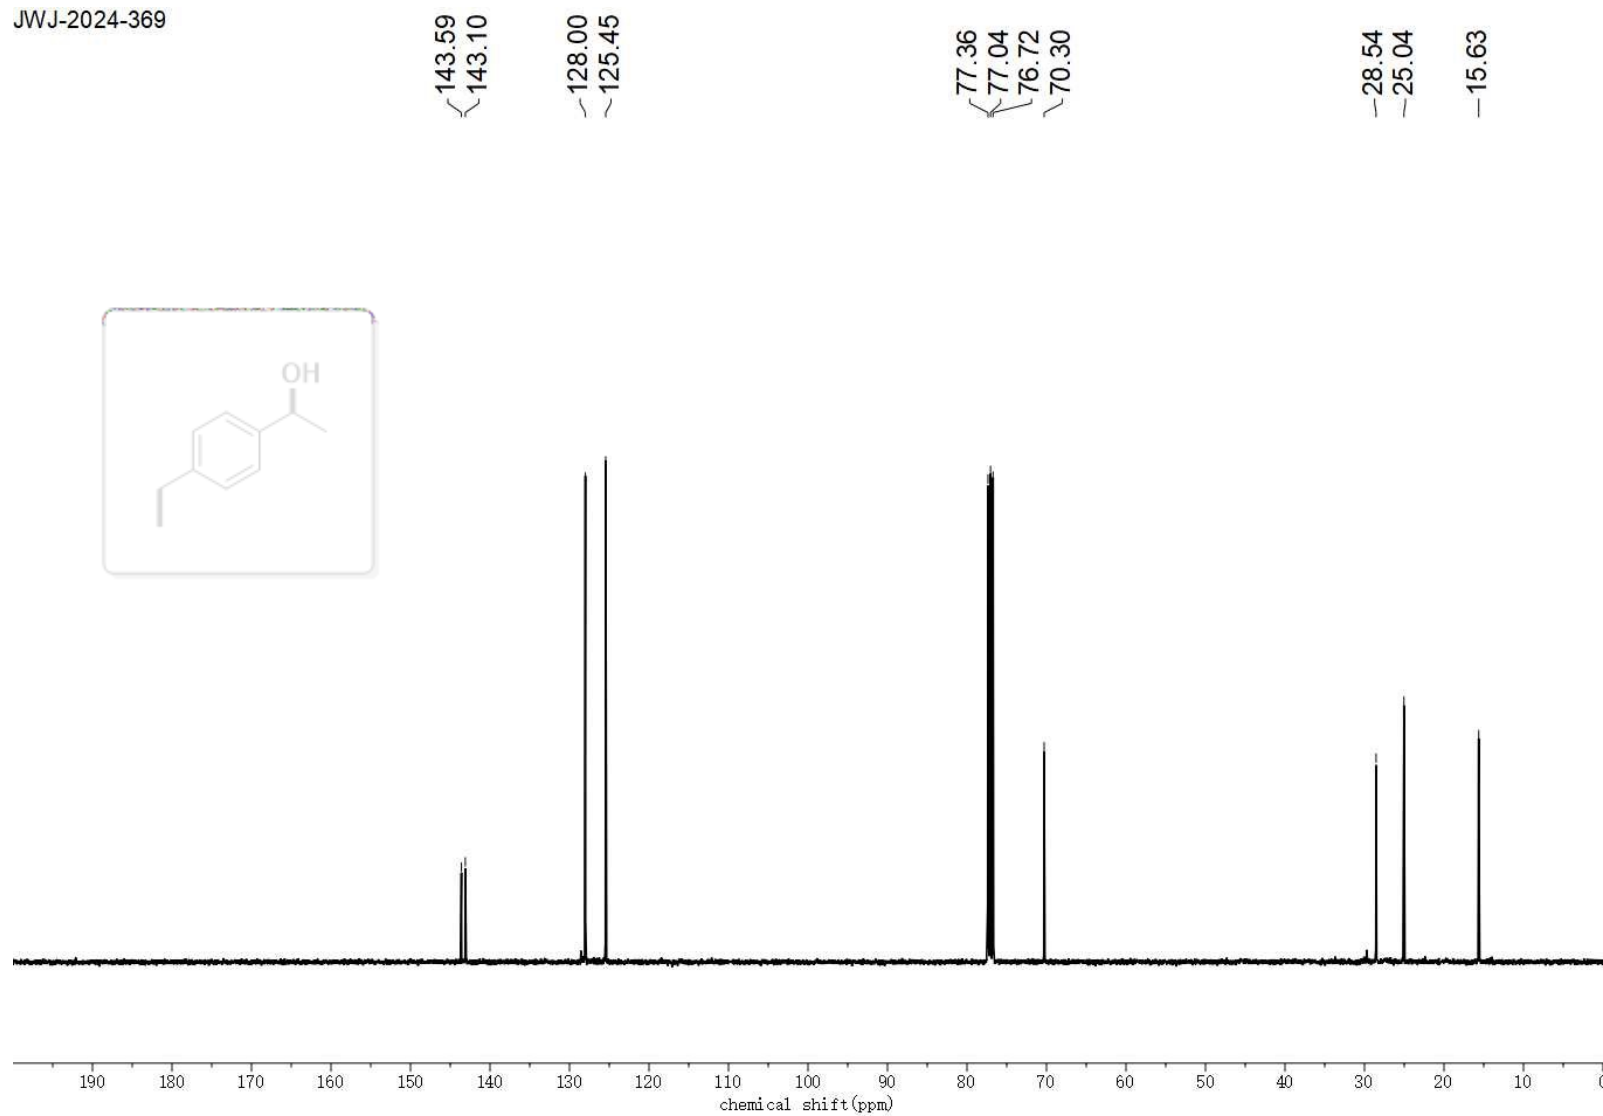

JWJ-2024-341

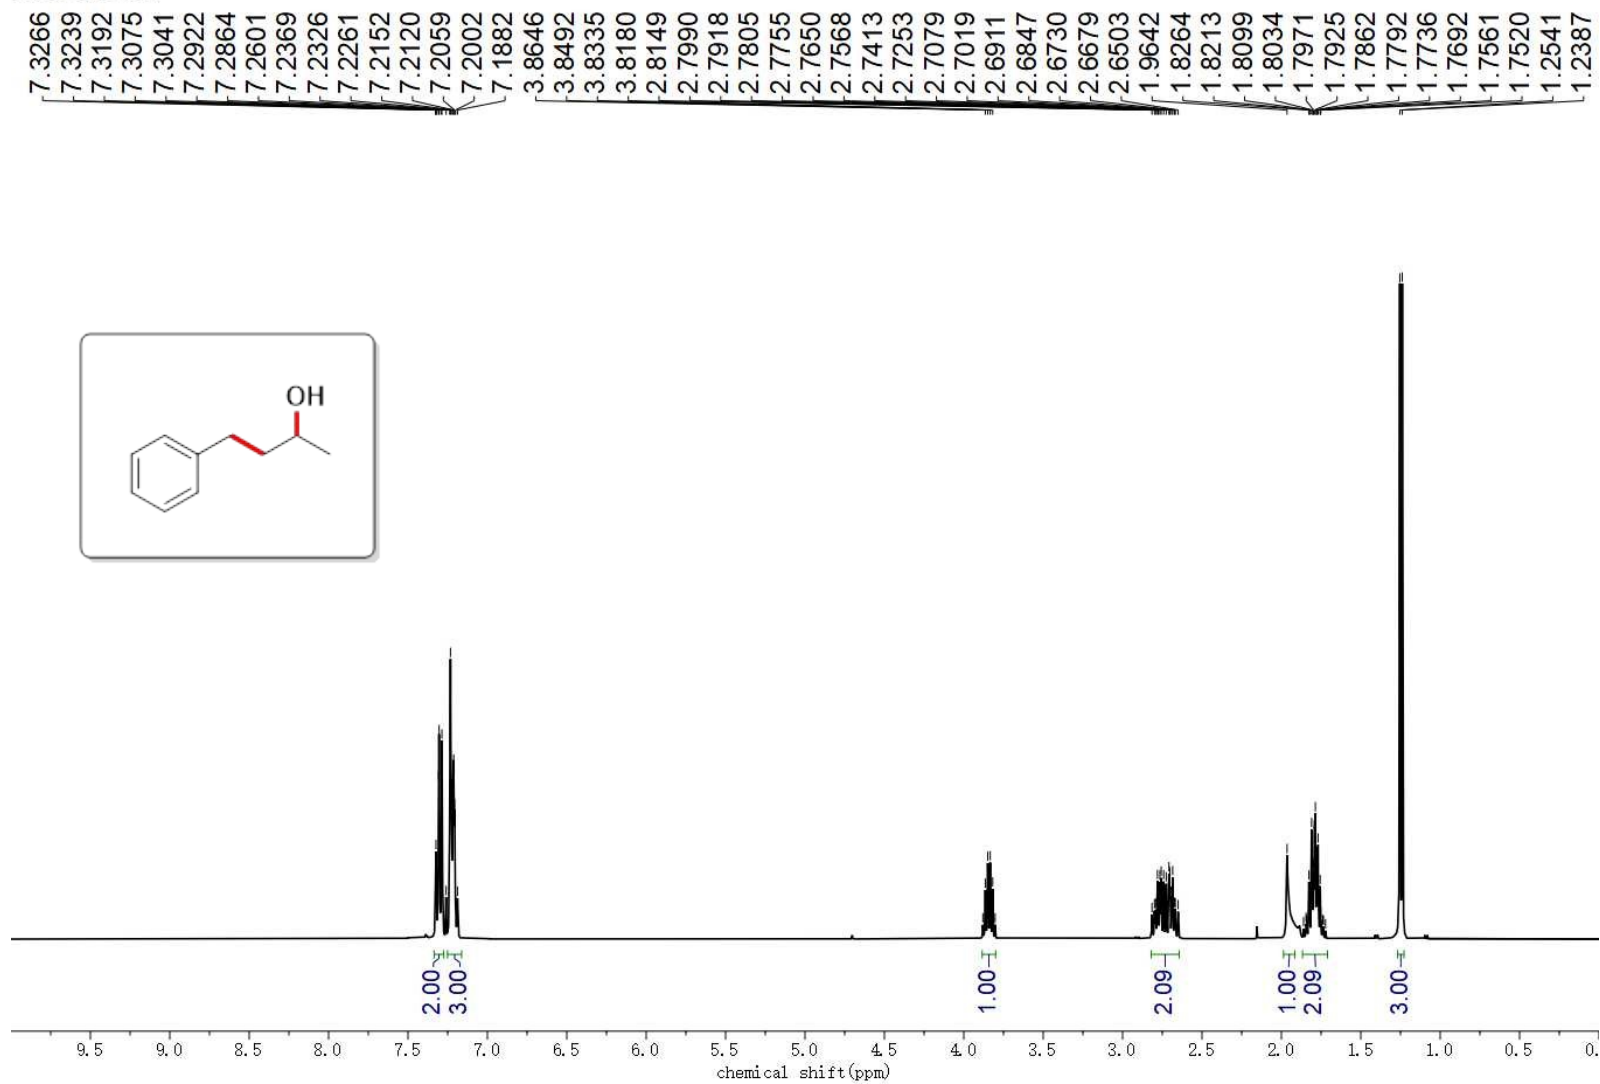

JWJ-2024-341

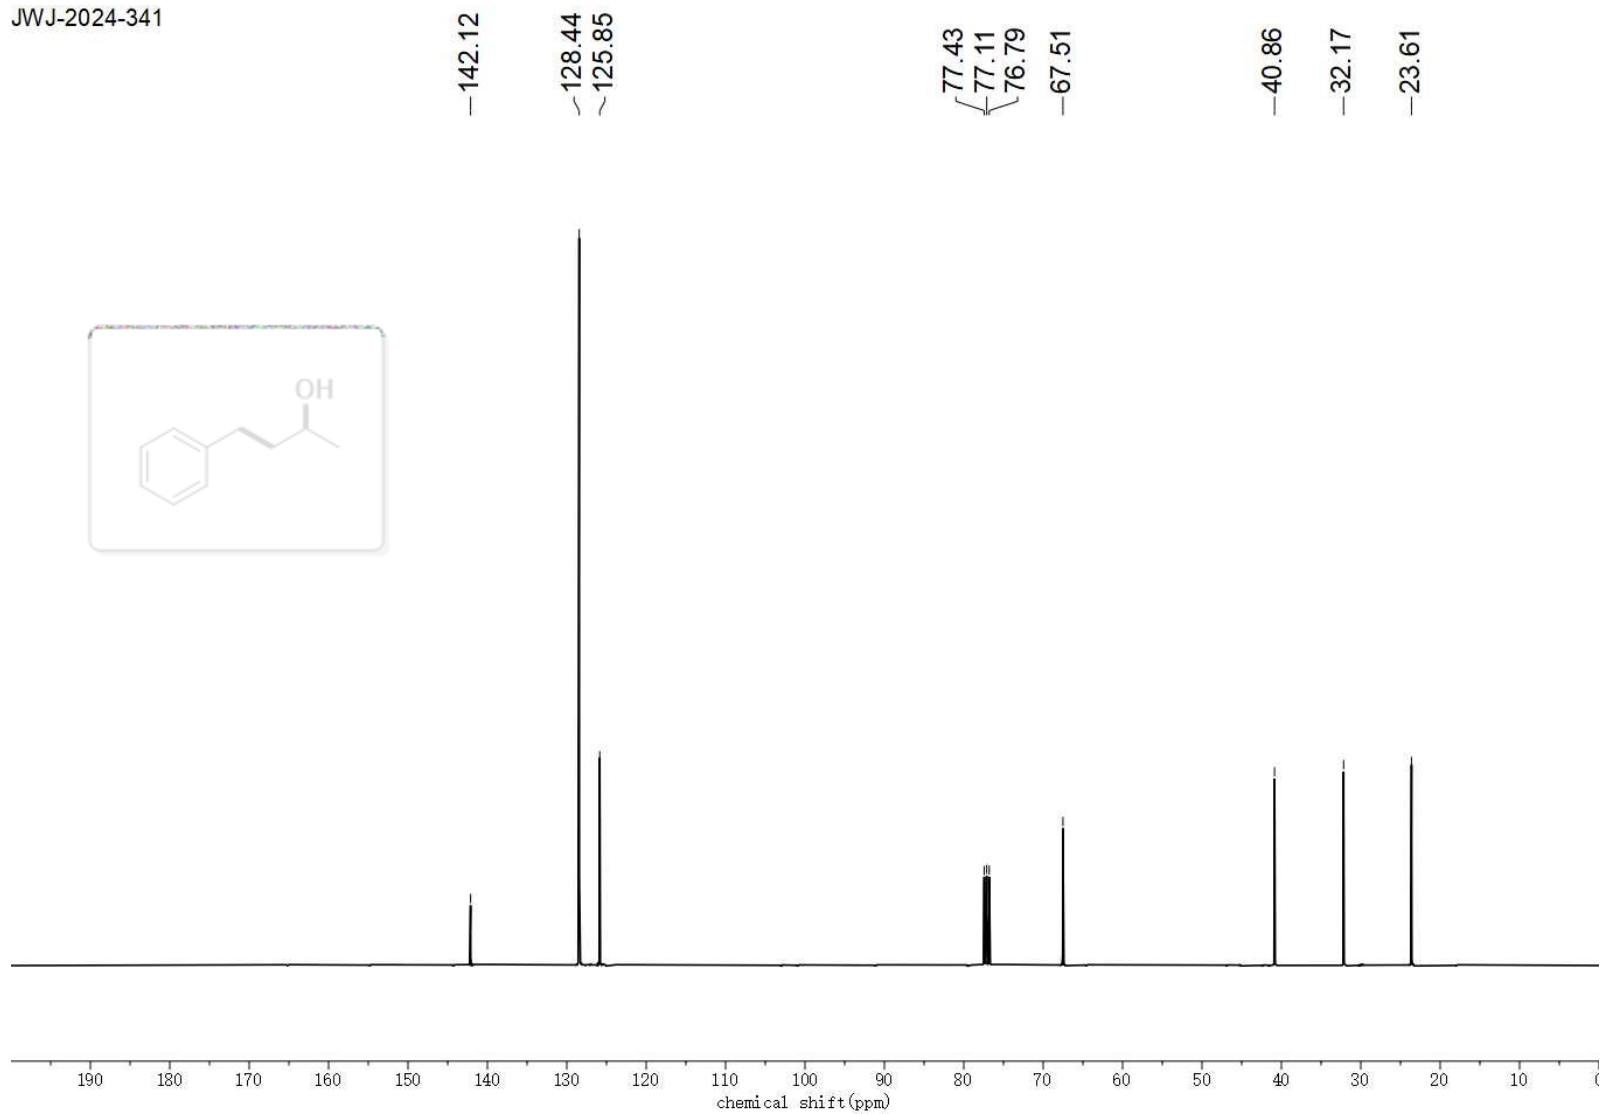

JWJ-2024-439

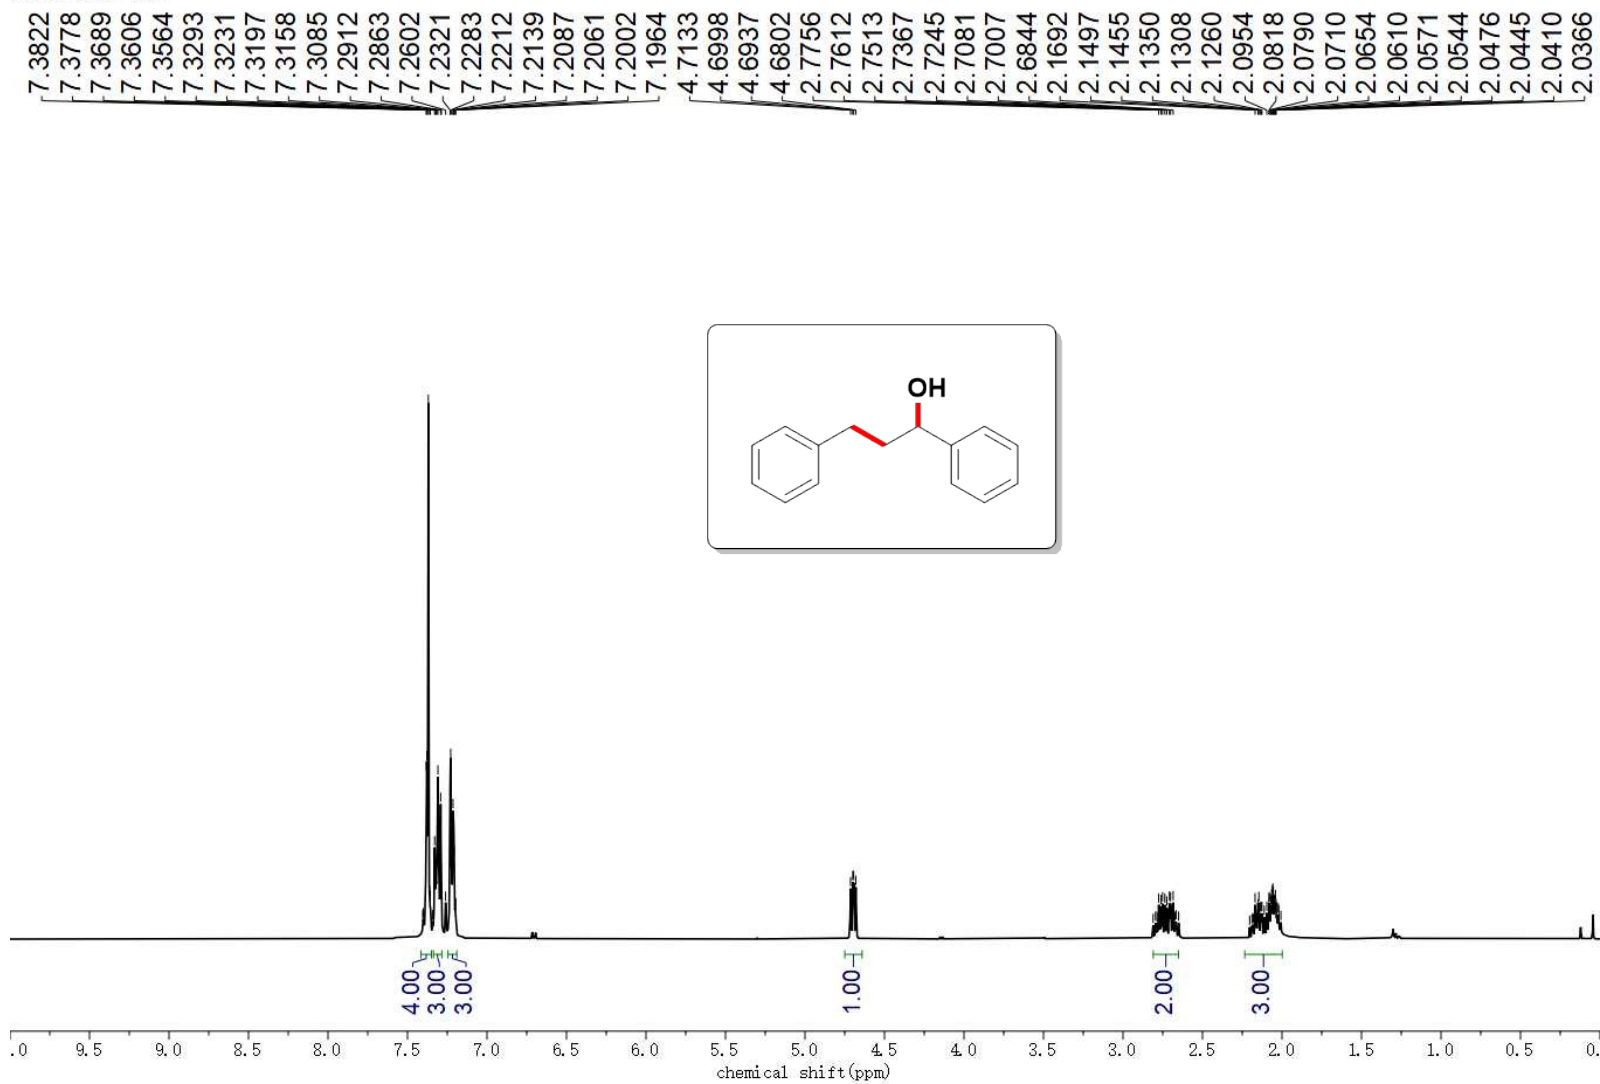

JWJ-2024-439

144.58  
141.82

128.56  
128.49  
128.44  
127.69  
125.99  
125.91

77.42  
77.10  
76.78  
73.93

40.48  
32.09

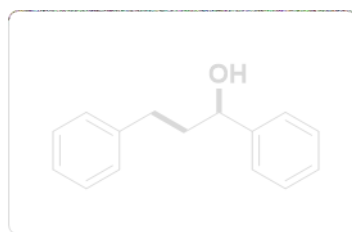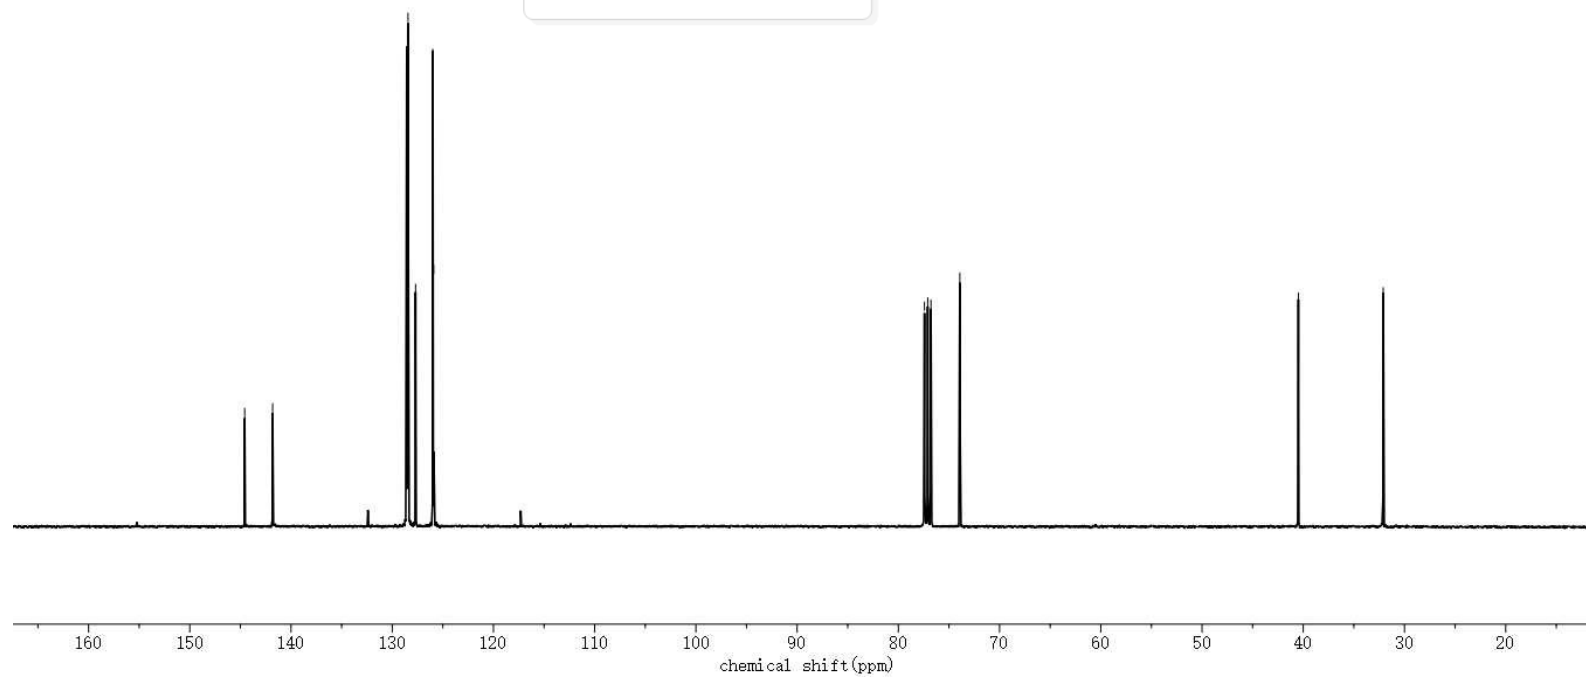

JWJ-2024-436

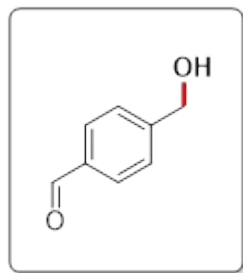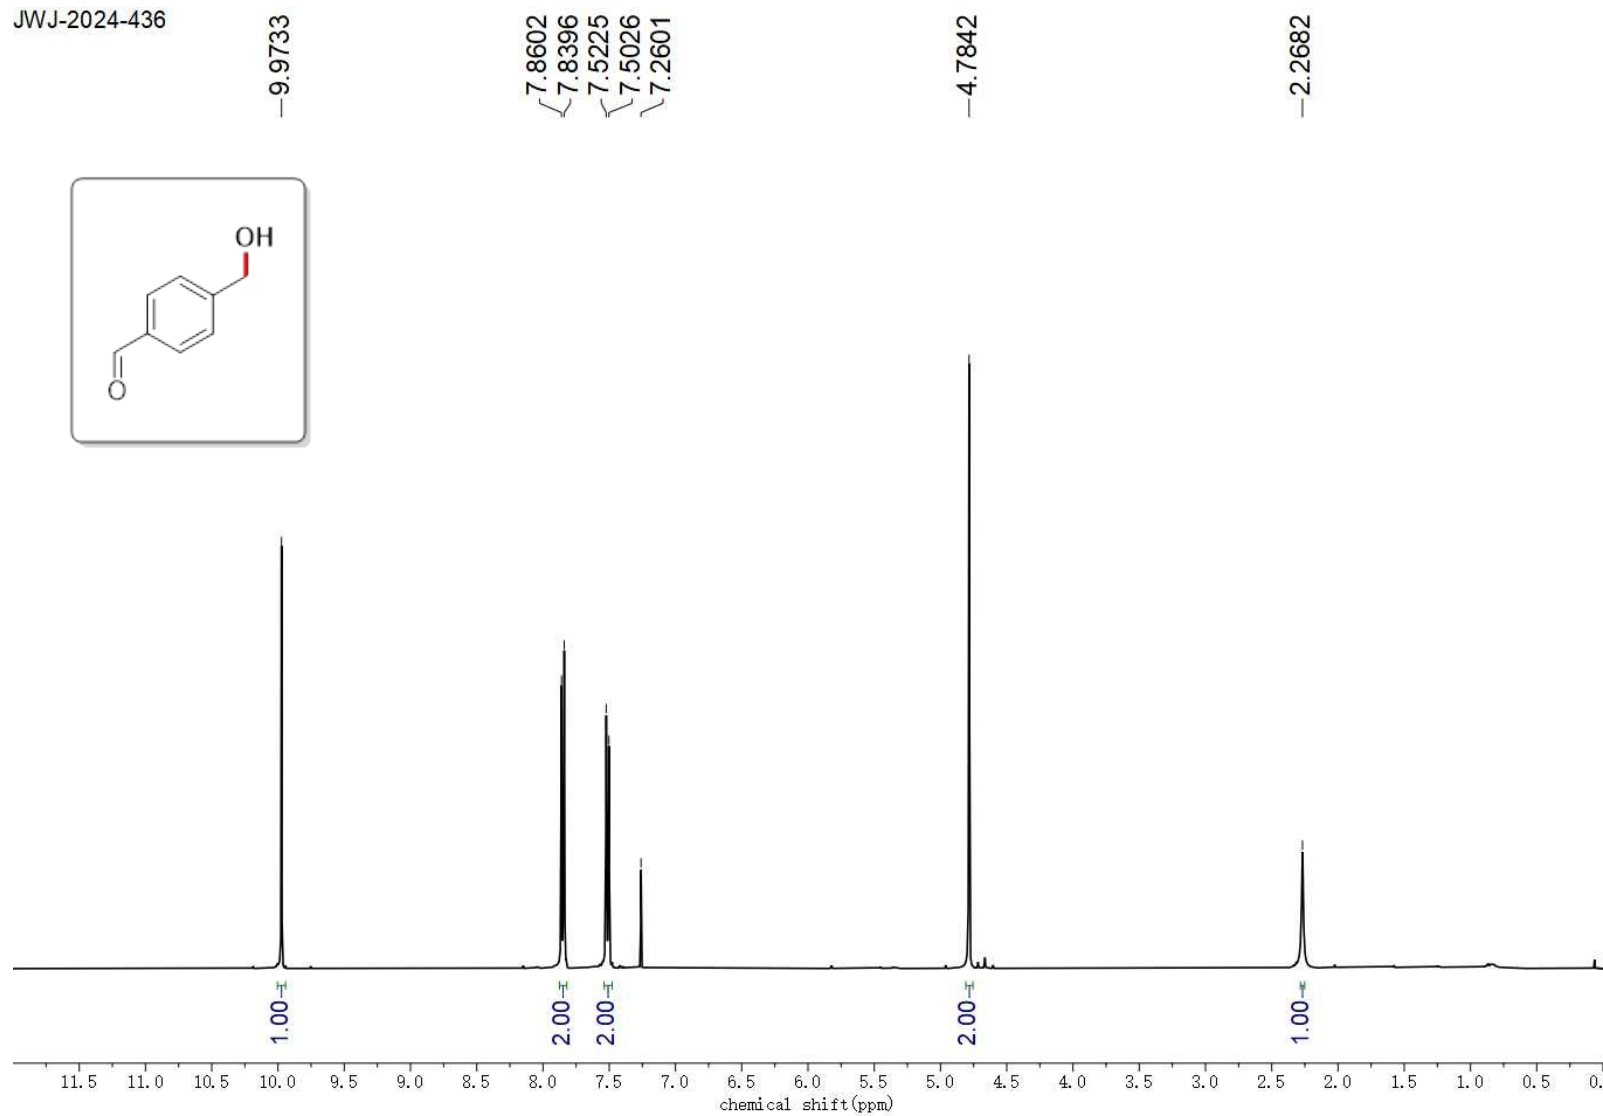

JWJ-2024-436

-192.16

-147.89

-135.63

-130.04

-126.97

77.37

77.06

76.74

-64.52

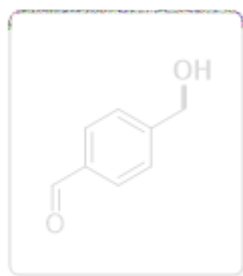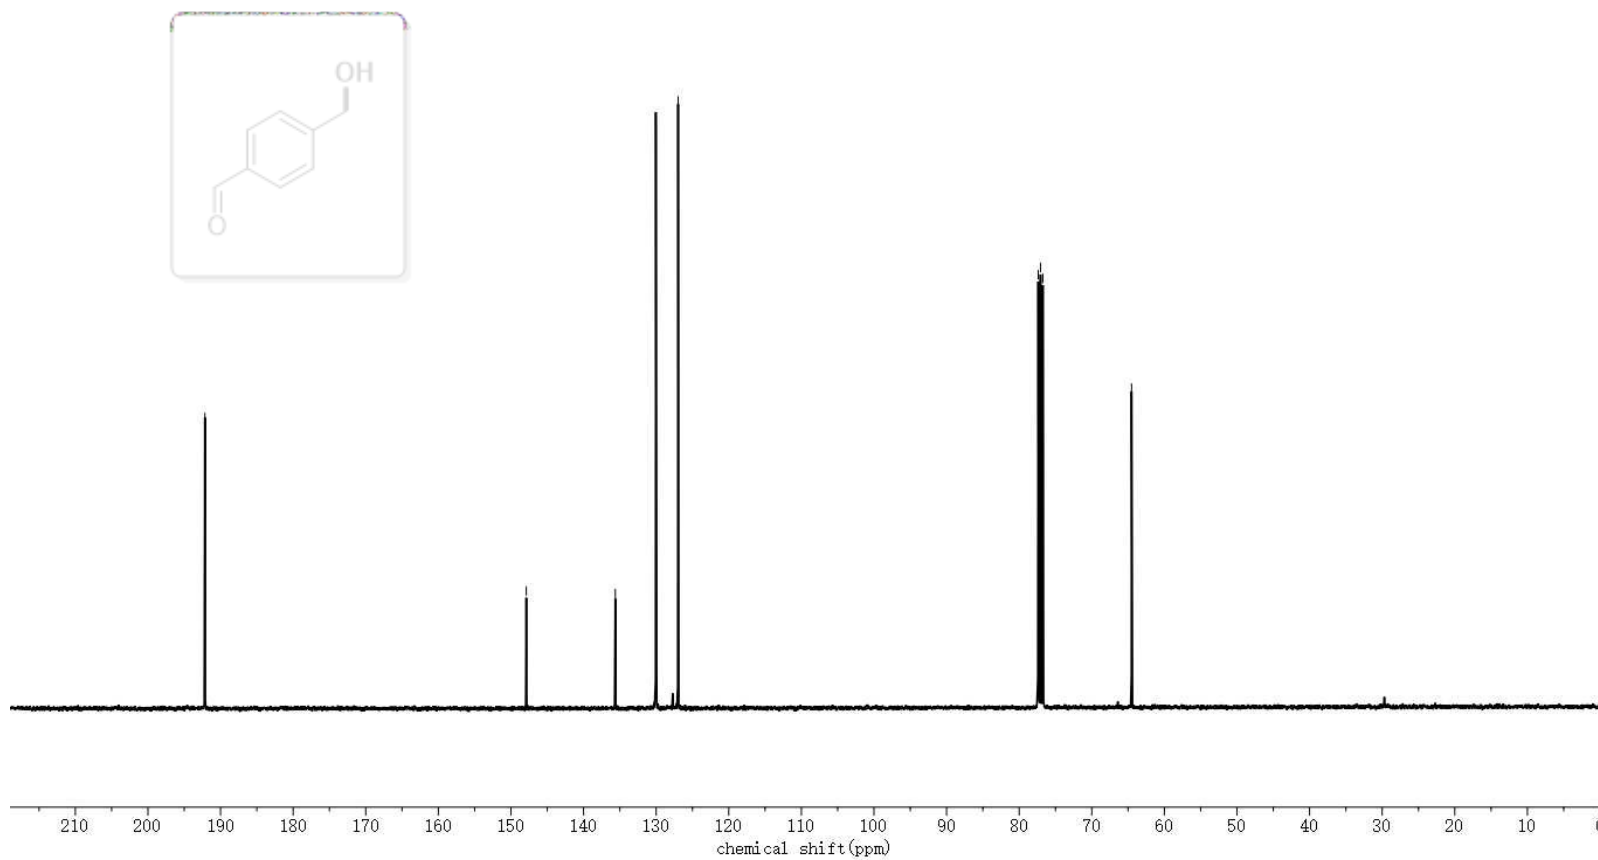



JWJ-2024-354

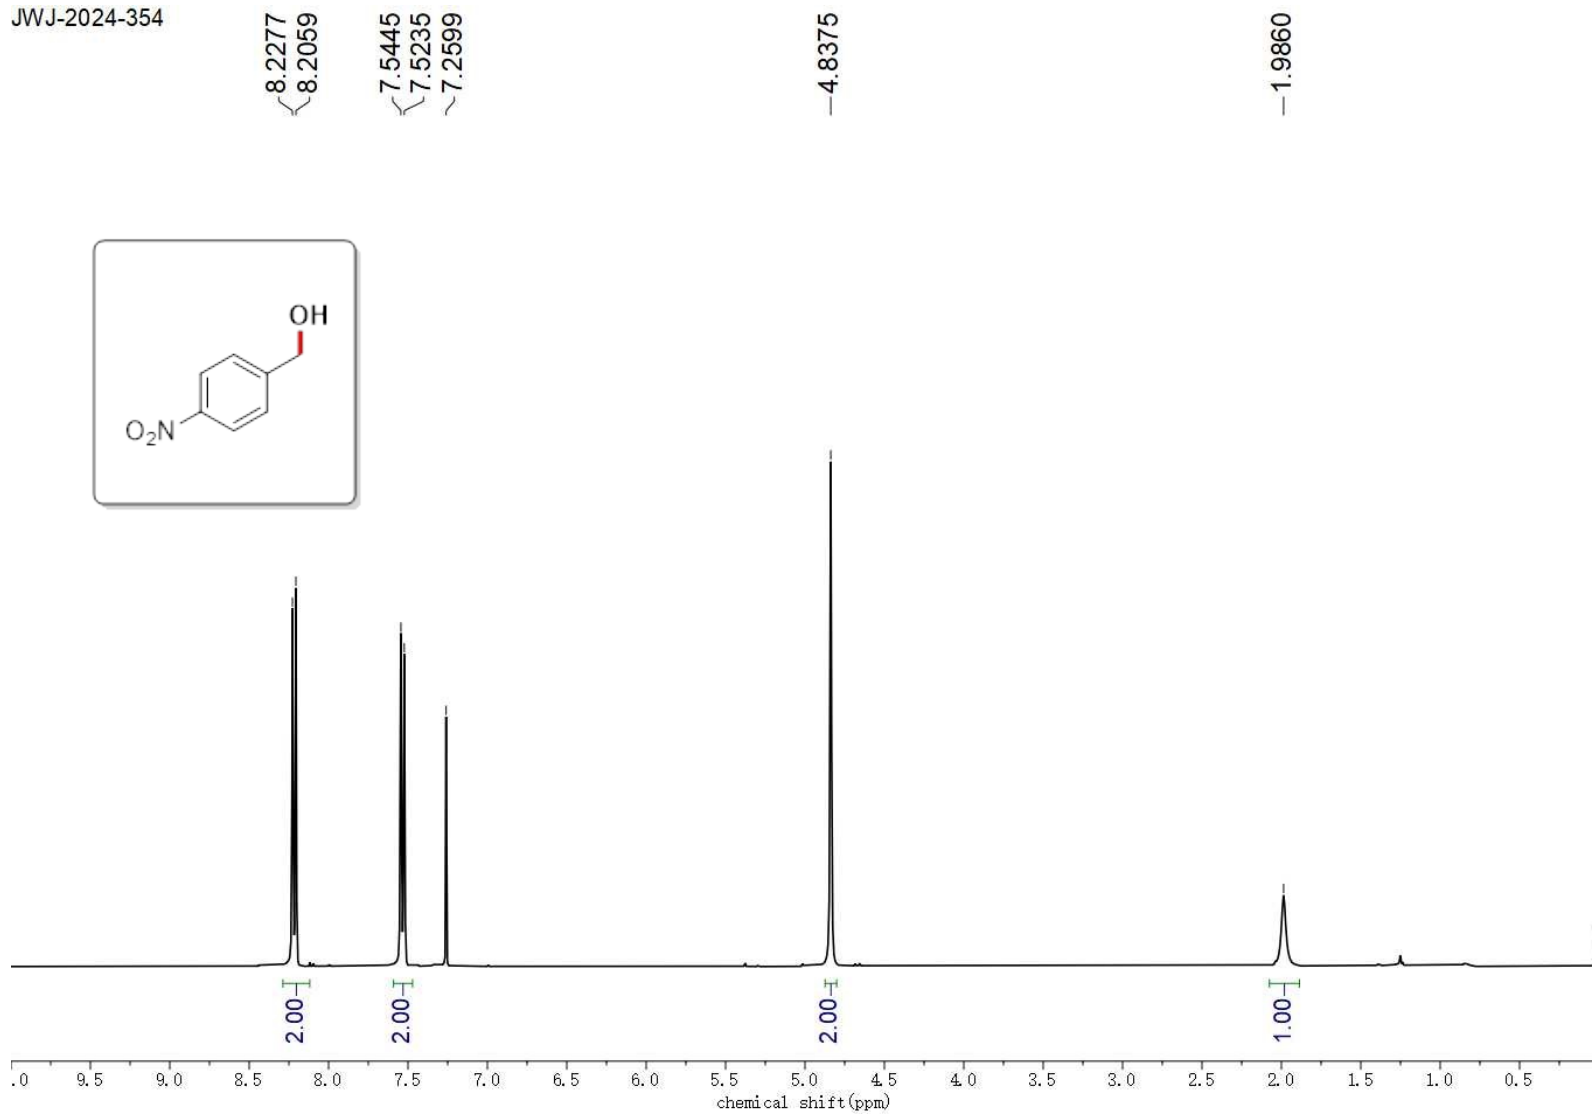

JWJ-2024-354

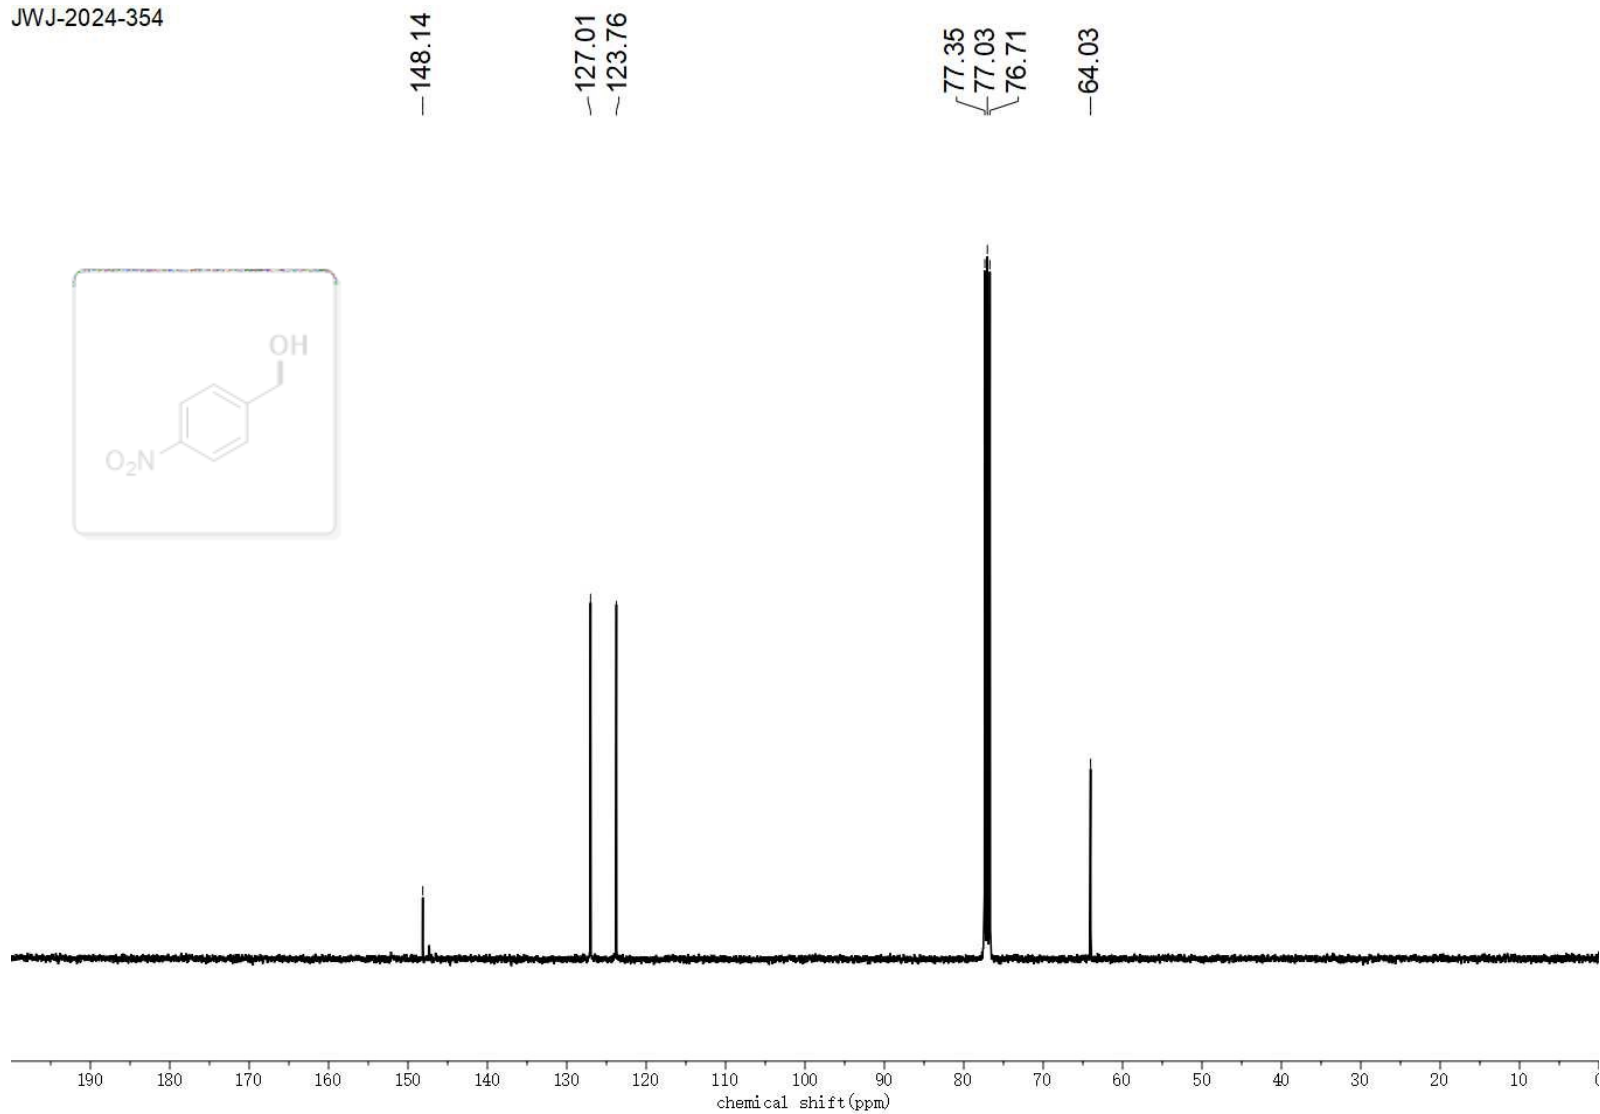

JWJ-2024-450

7.6501  
7.6295  
7.4825  
7.4620  
7.2601

4.7770

2.0347

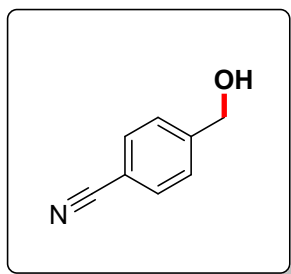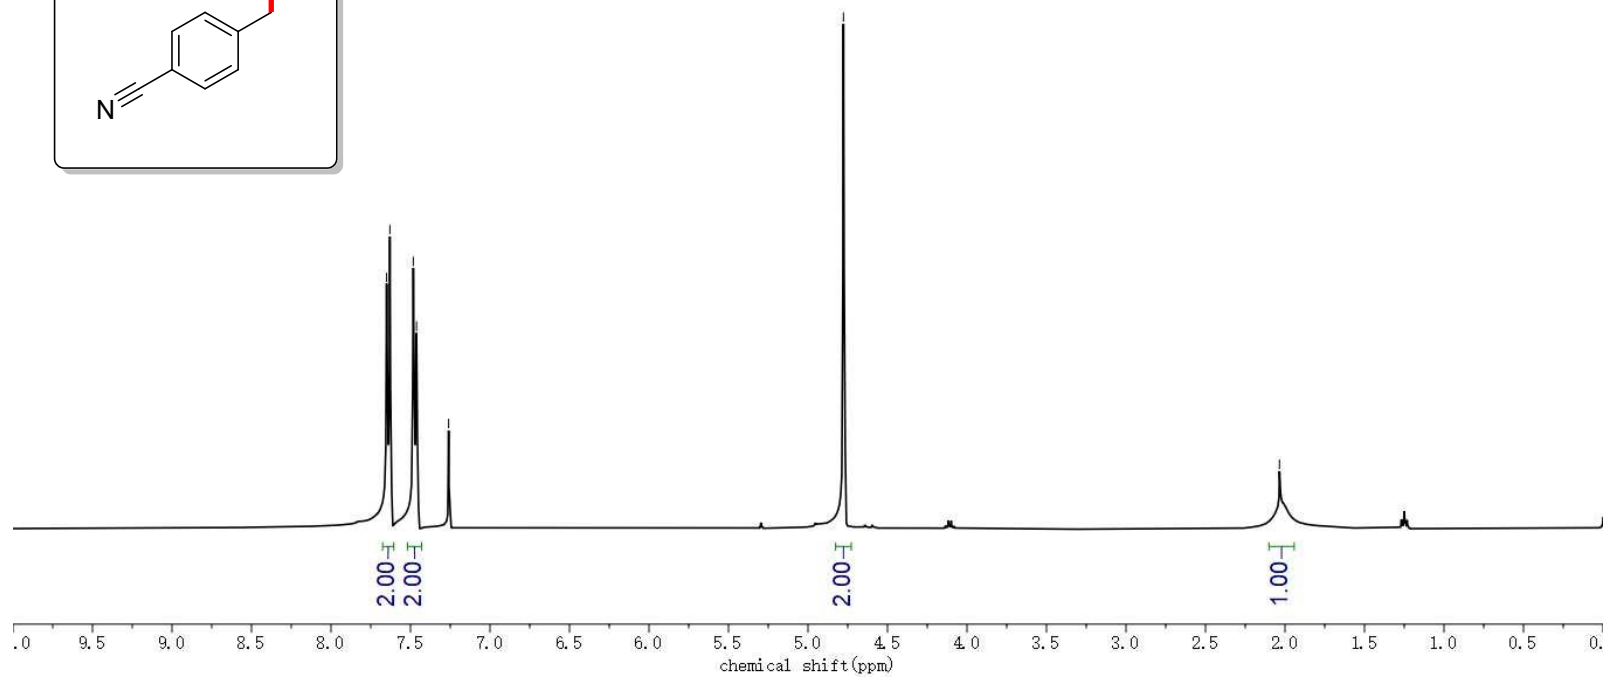

JWJ-2024-450

-146.21

-132.34

-127.03

-118.87

-111.17

77.36

77.04

76.73

-64.23

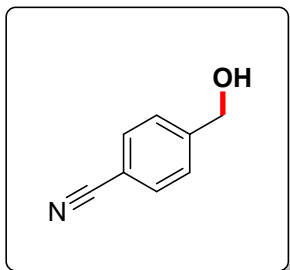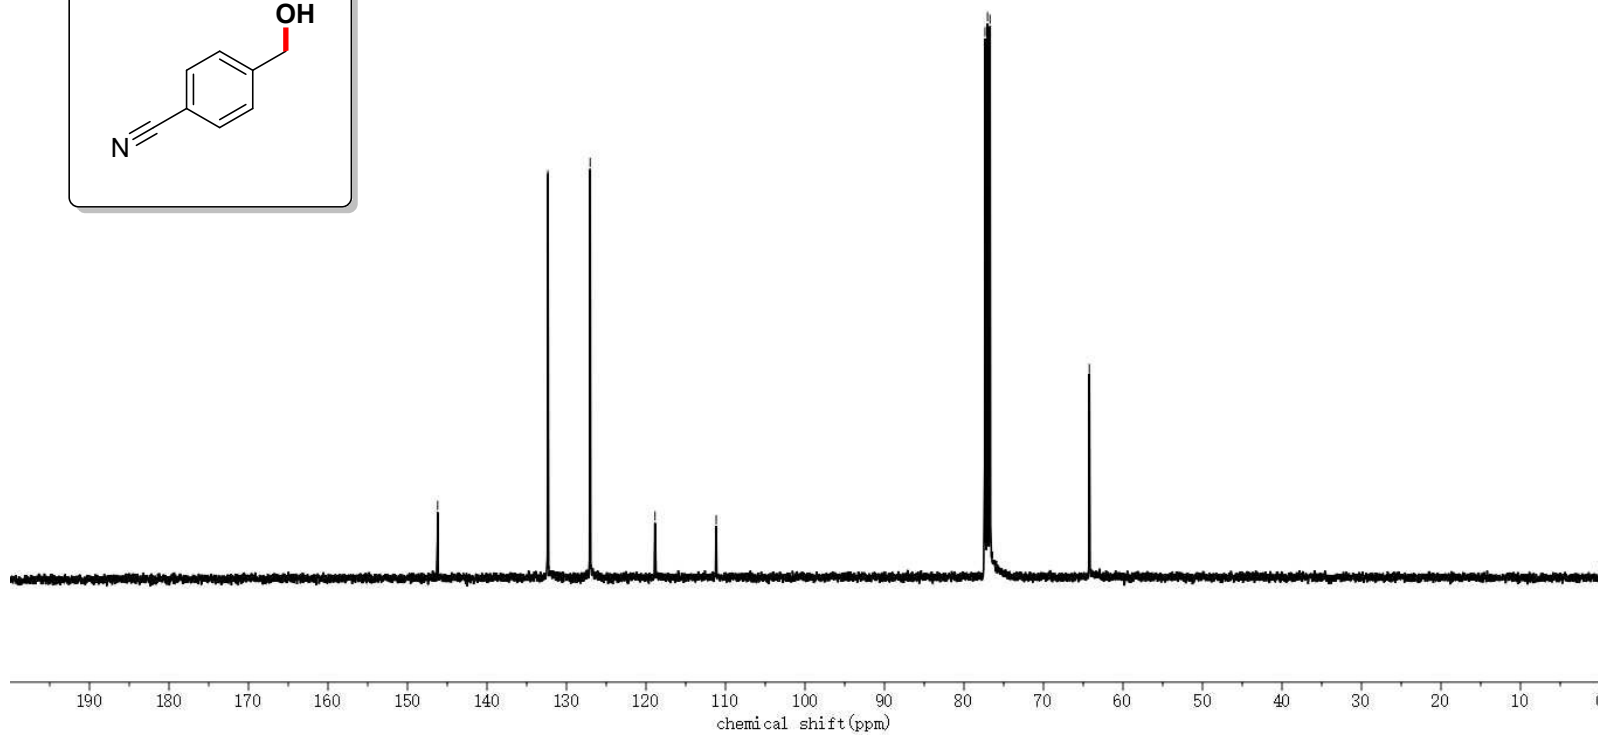

JWJ-2024-351

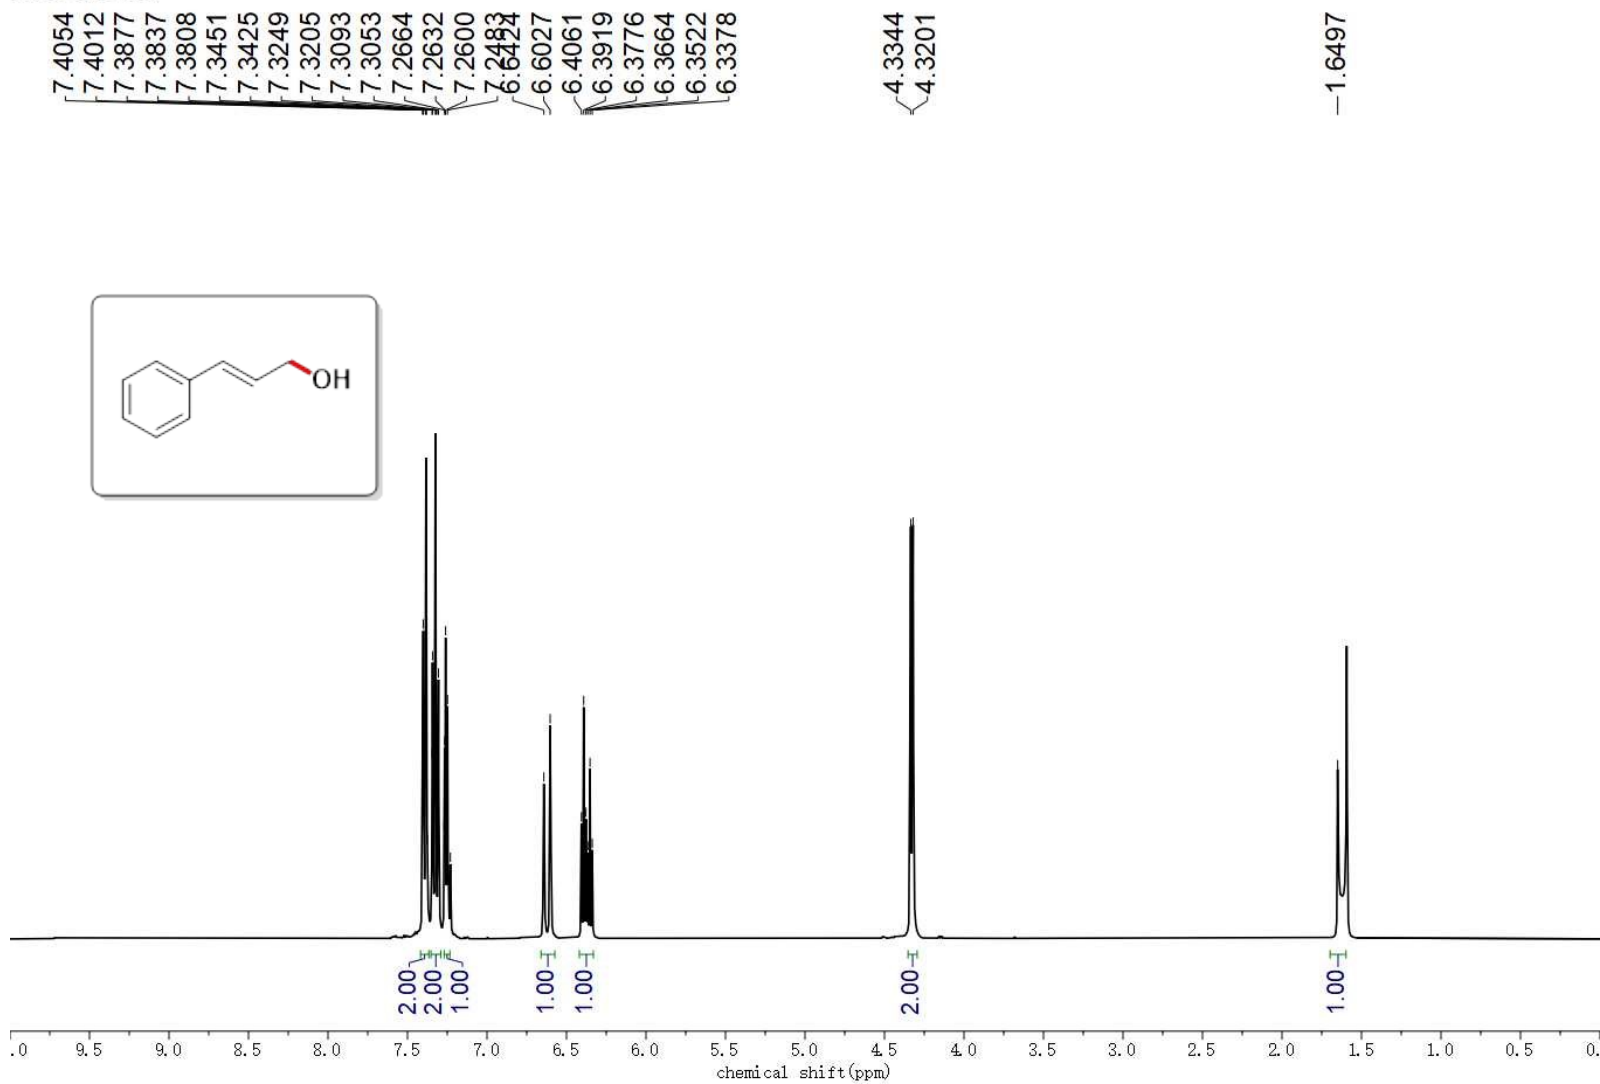

JWJ-2024-351

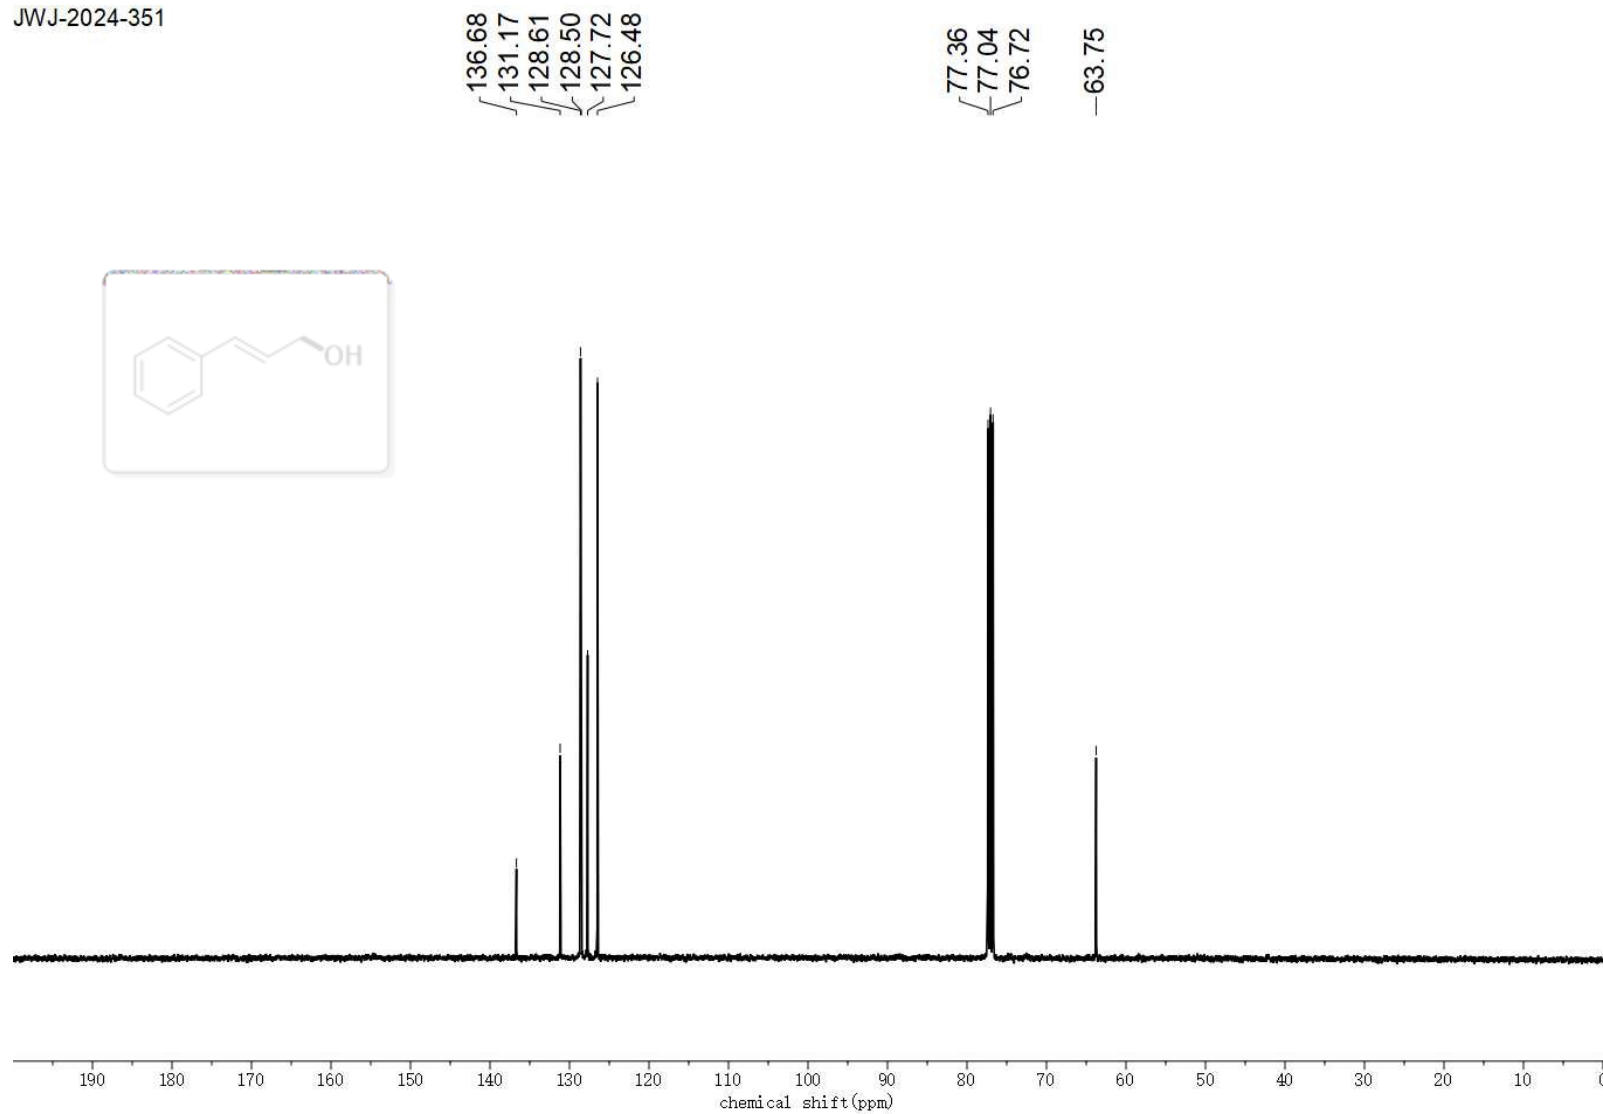

JWJ-2024-351

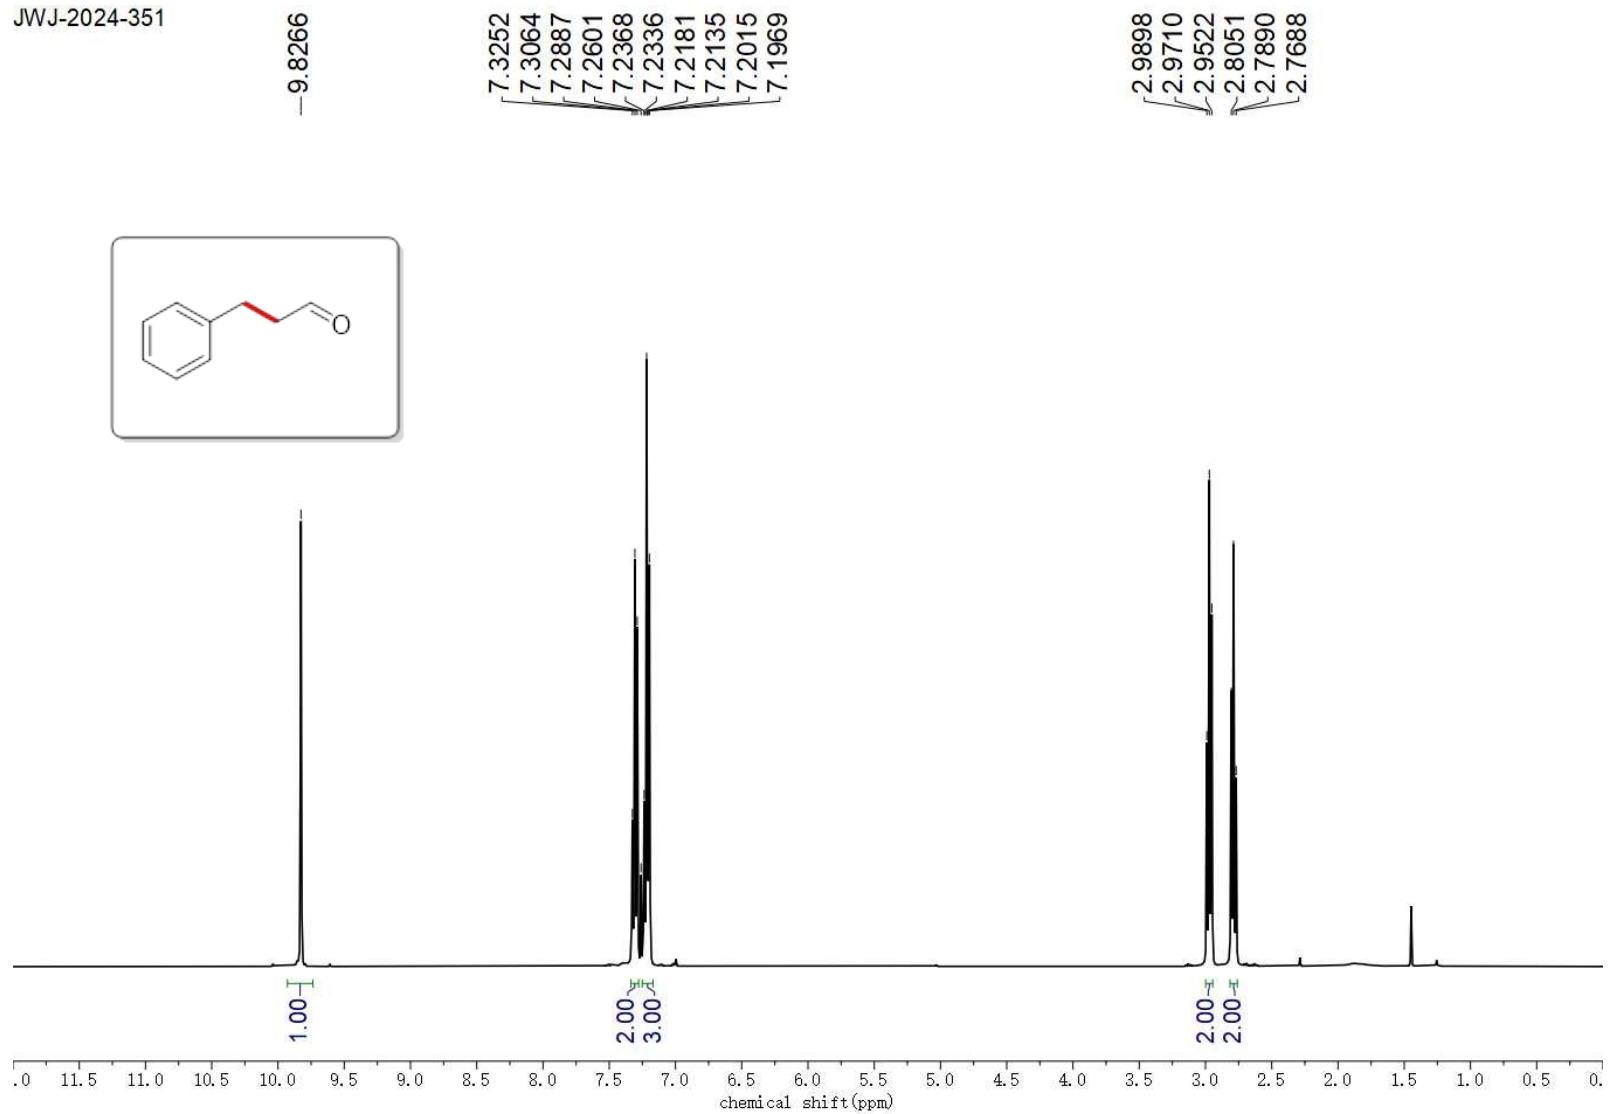

JWJ-2024-351

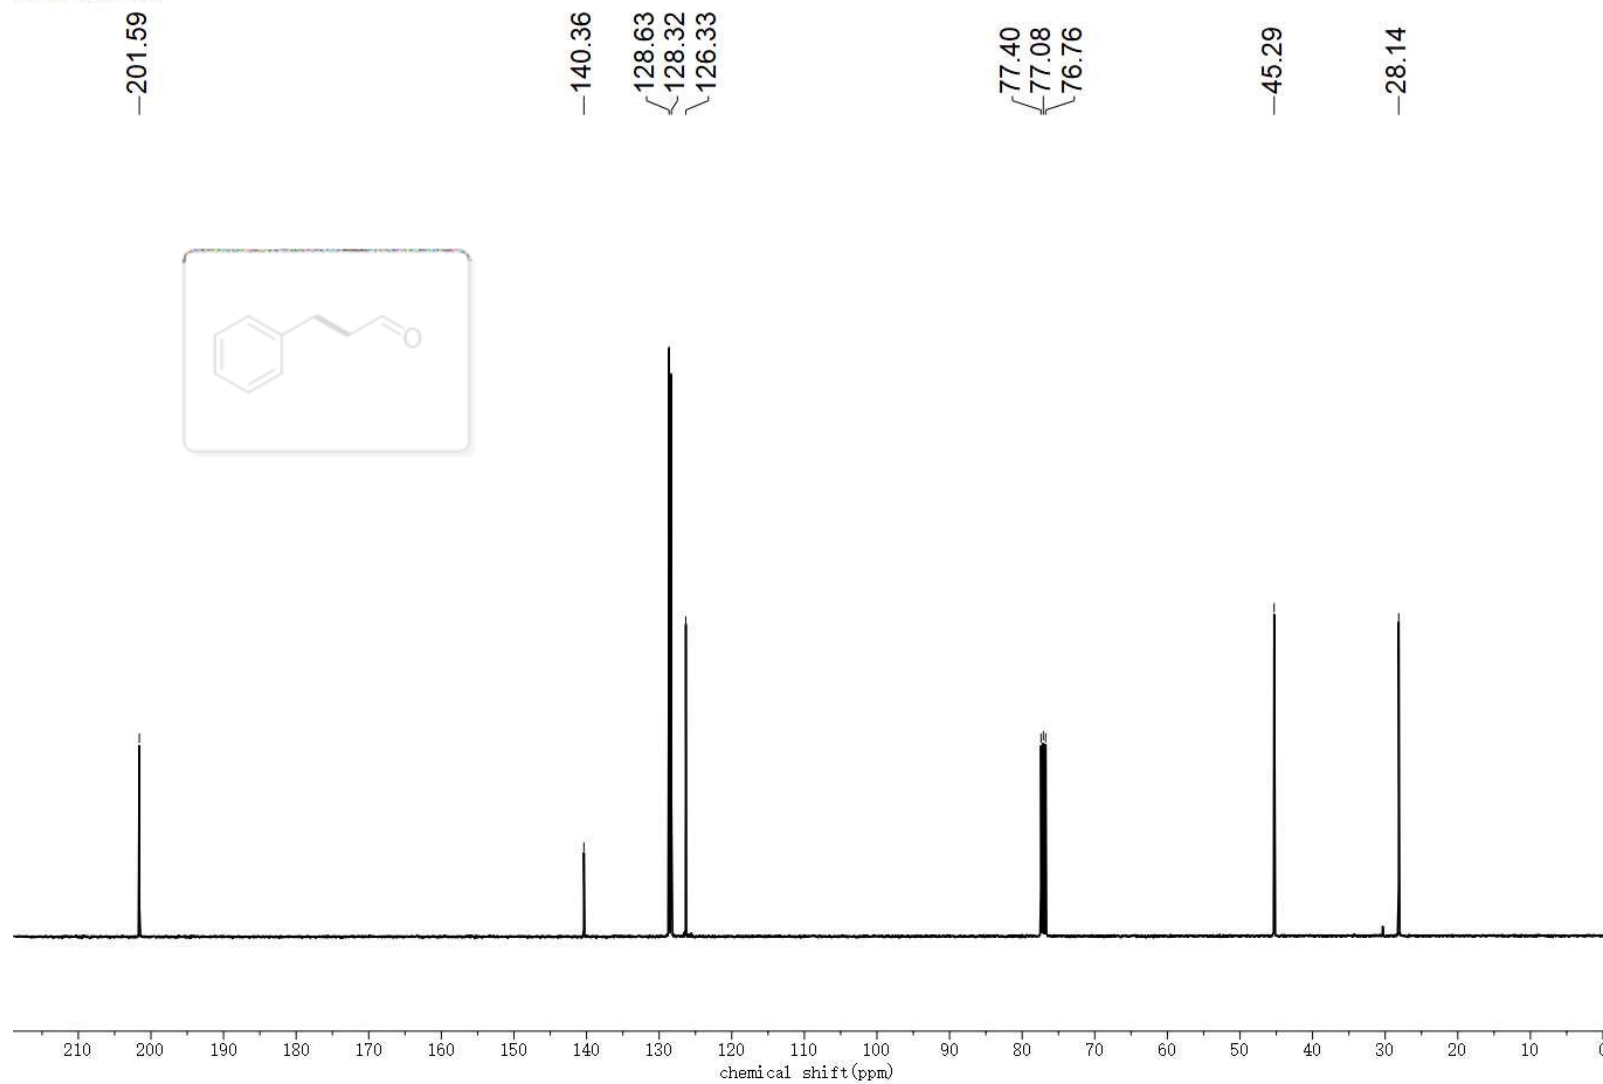



JWJ-2024-443

8.14  
8.12

7.35  
7.33  
7.26

2.78  
2.76  
2.74  
2.73

1.29  
1.28  
1.26

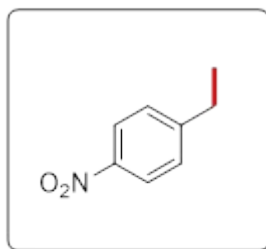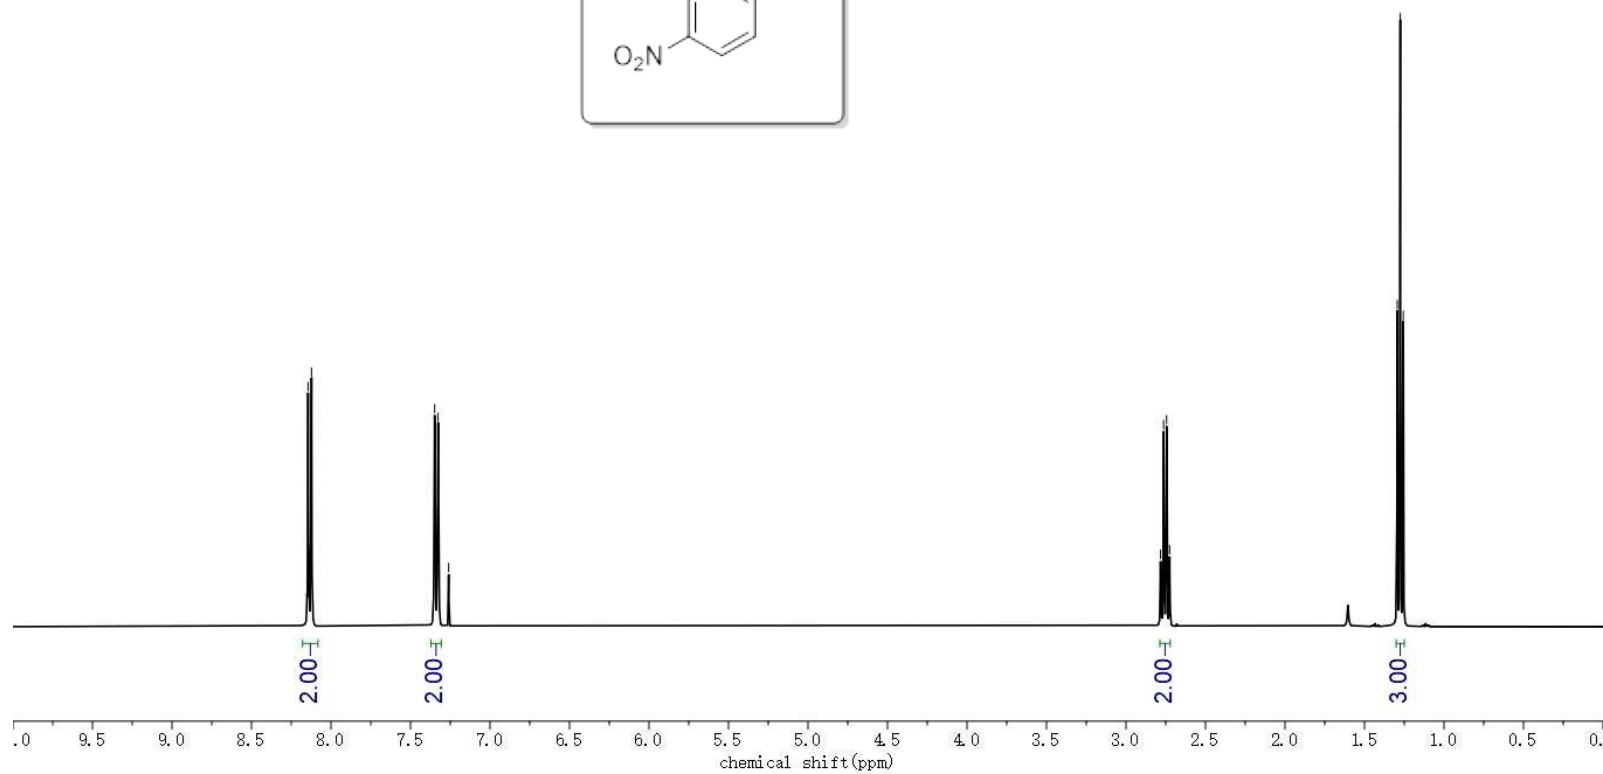

JWJ-2024-443

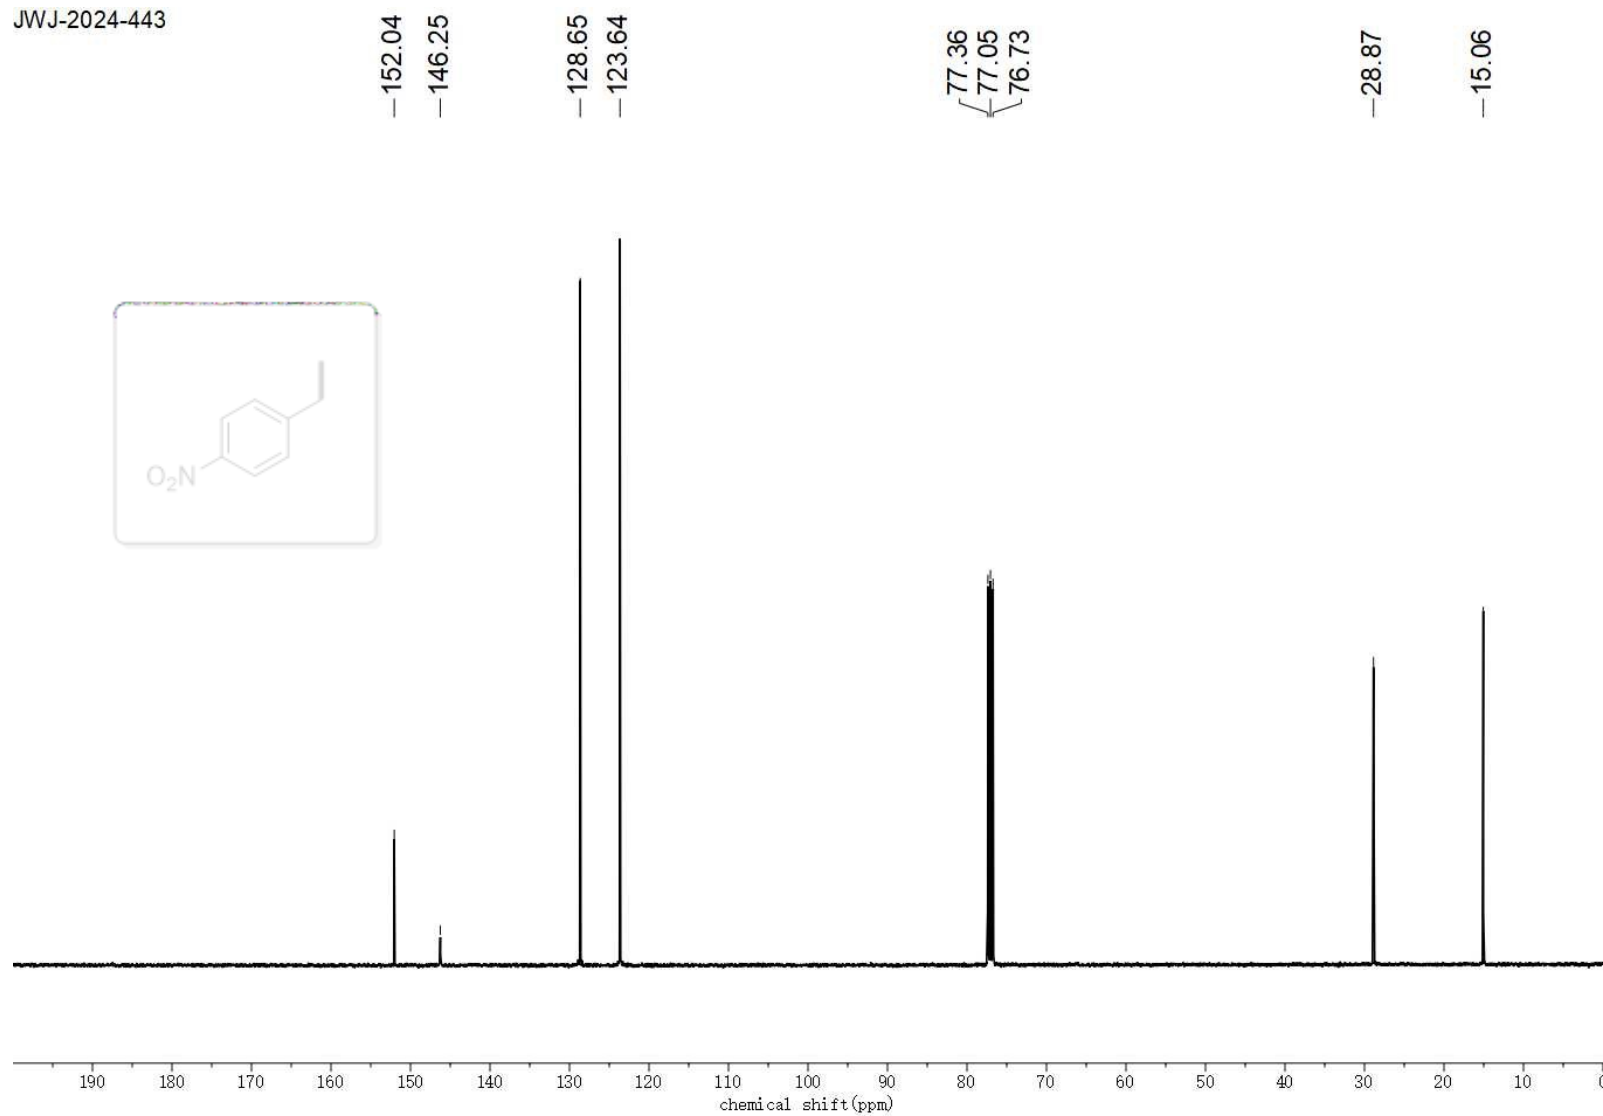

JWJ-2024-374

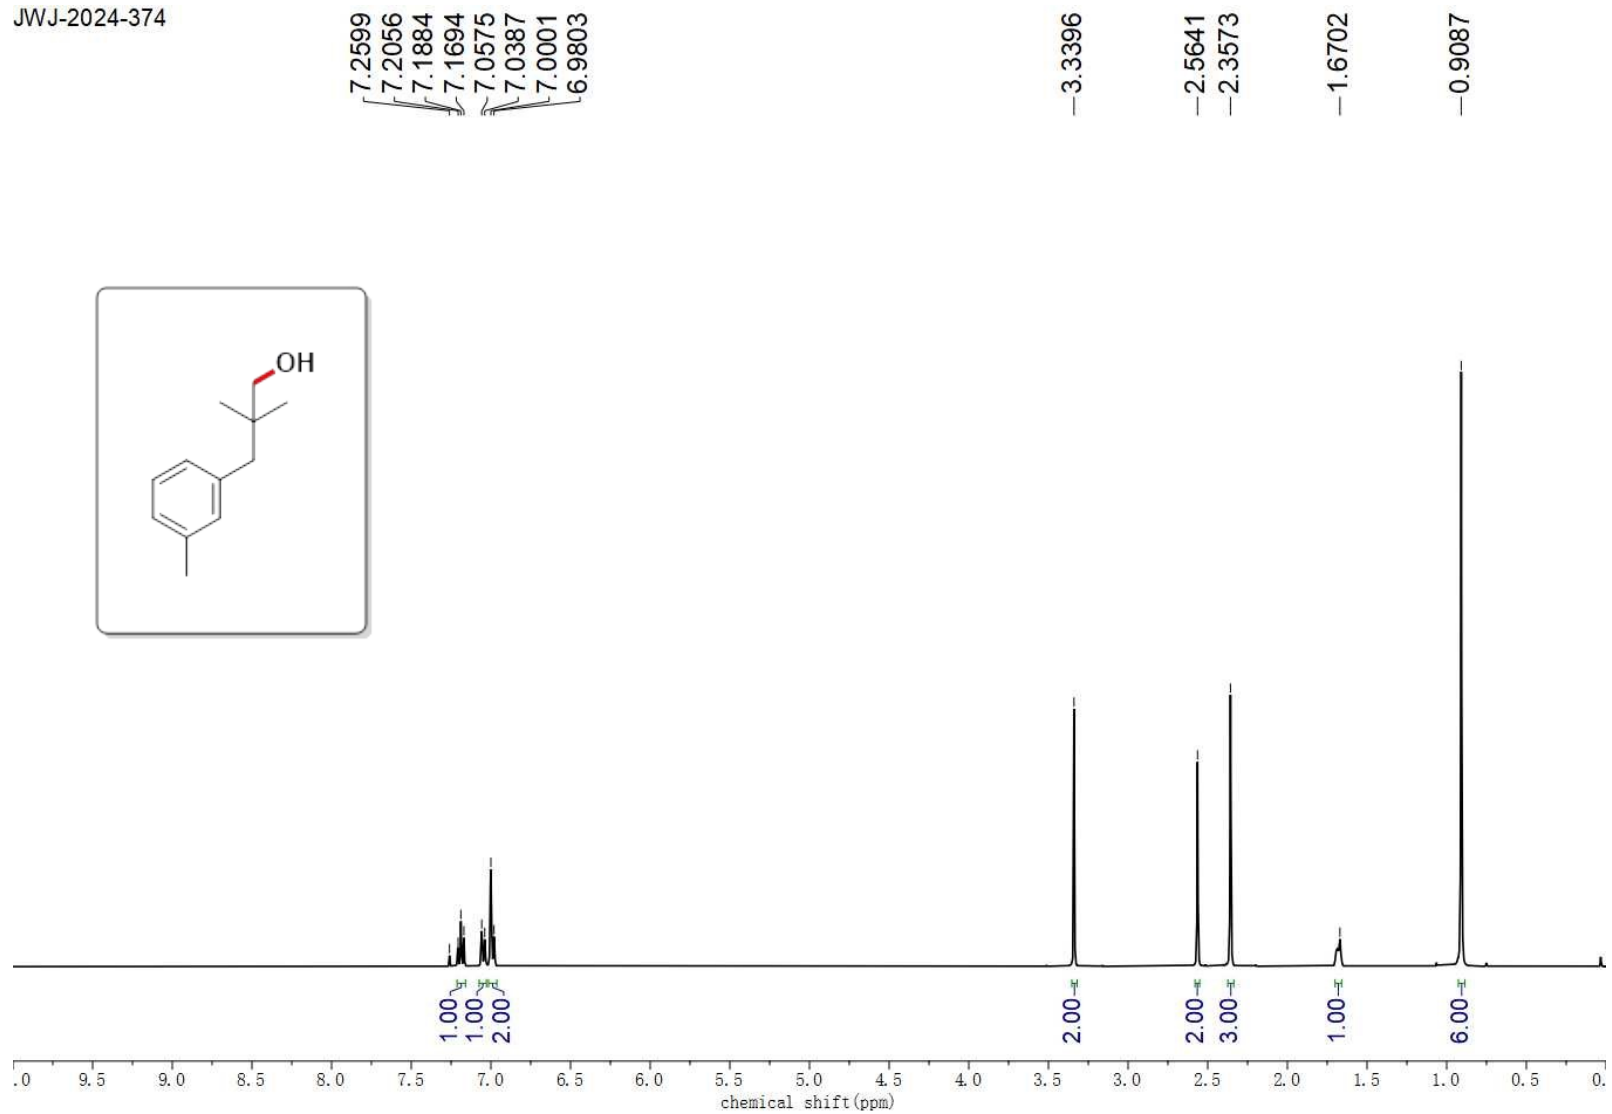

JWJ-2024-374

138.78  
137.37  
131.33  
127.78  
127.60  
126.73

77.43  
77.11  
76.79  
71.26

44.68

36.43

24.08  
21.51

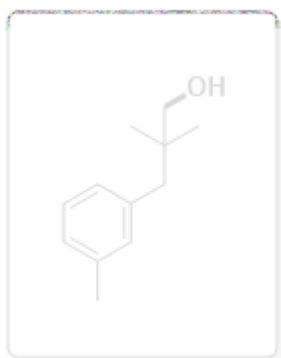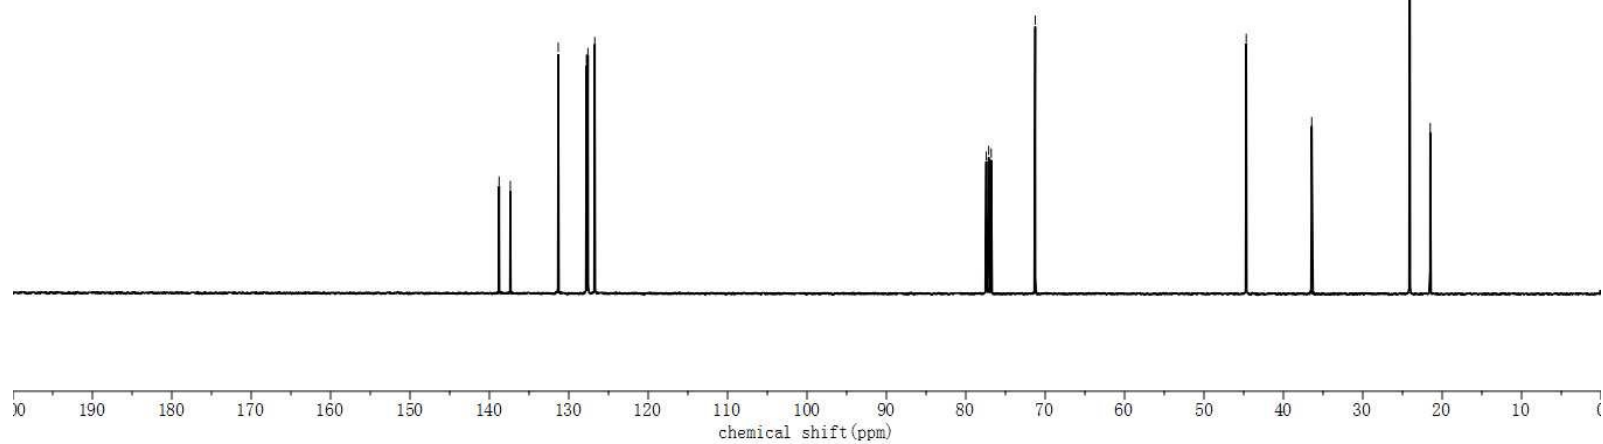

JWJ-2024-403

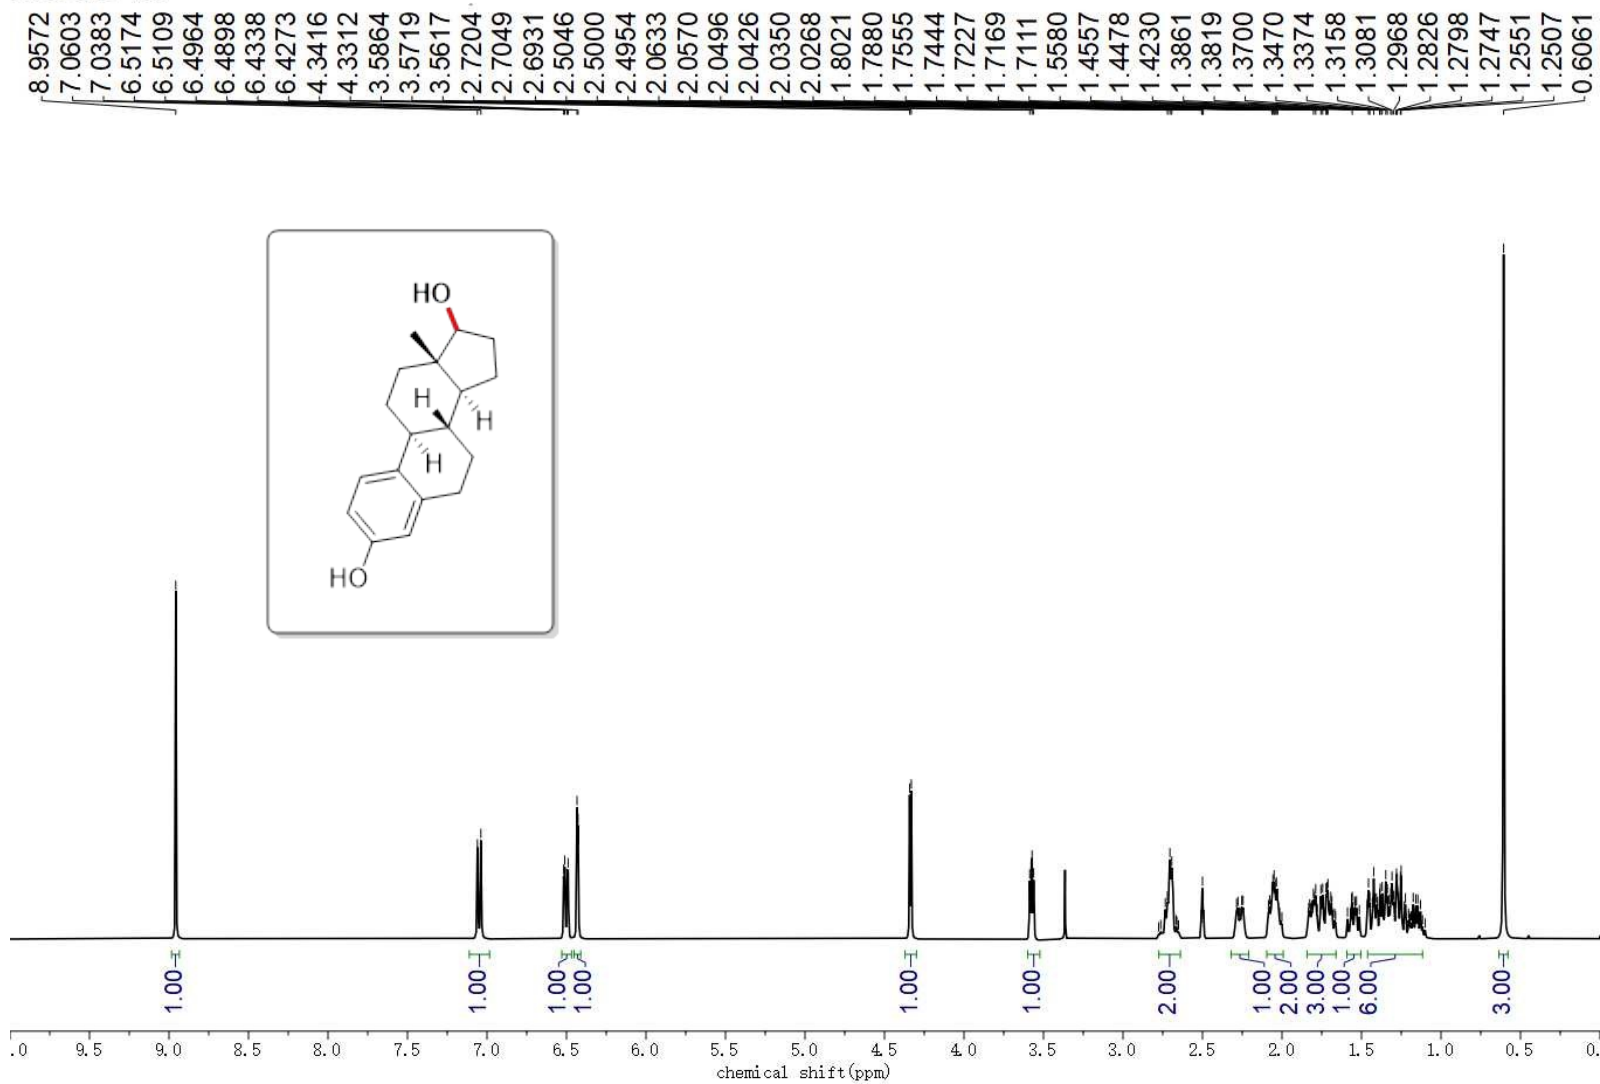

JWJ-2024-403

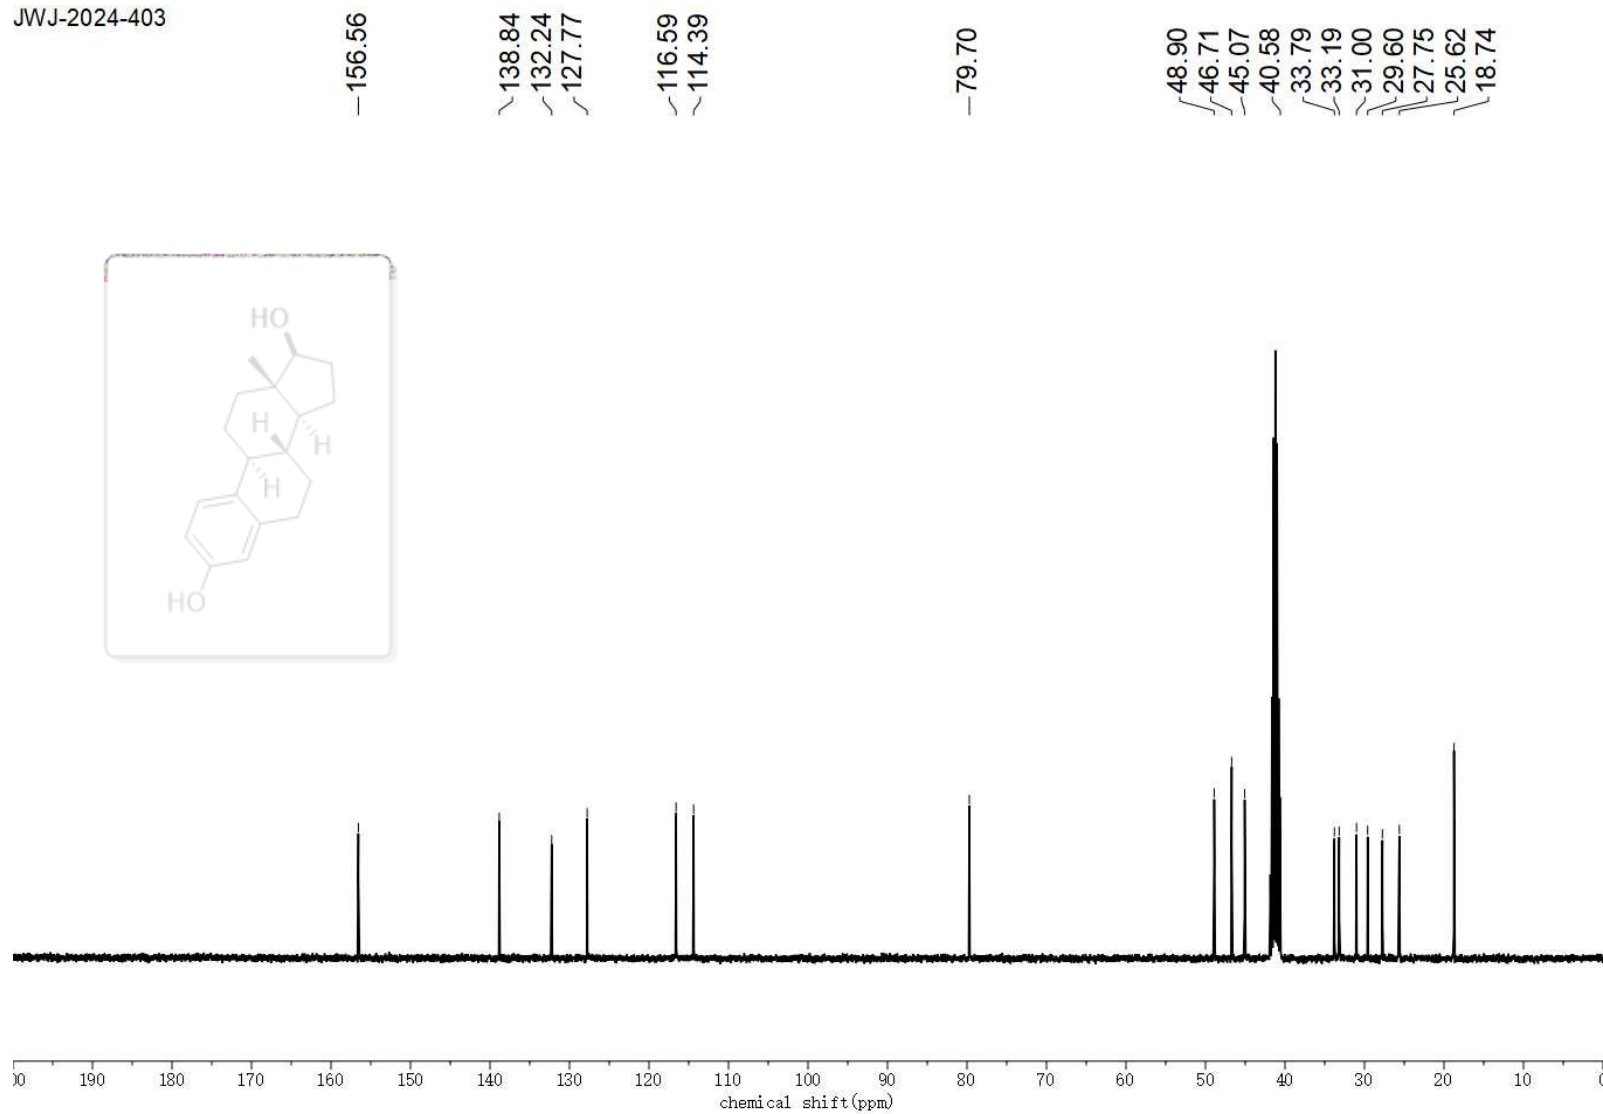

JWJ-2024-399

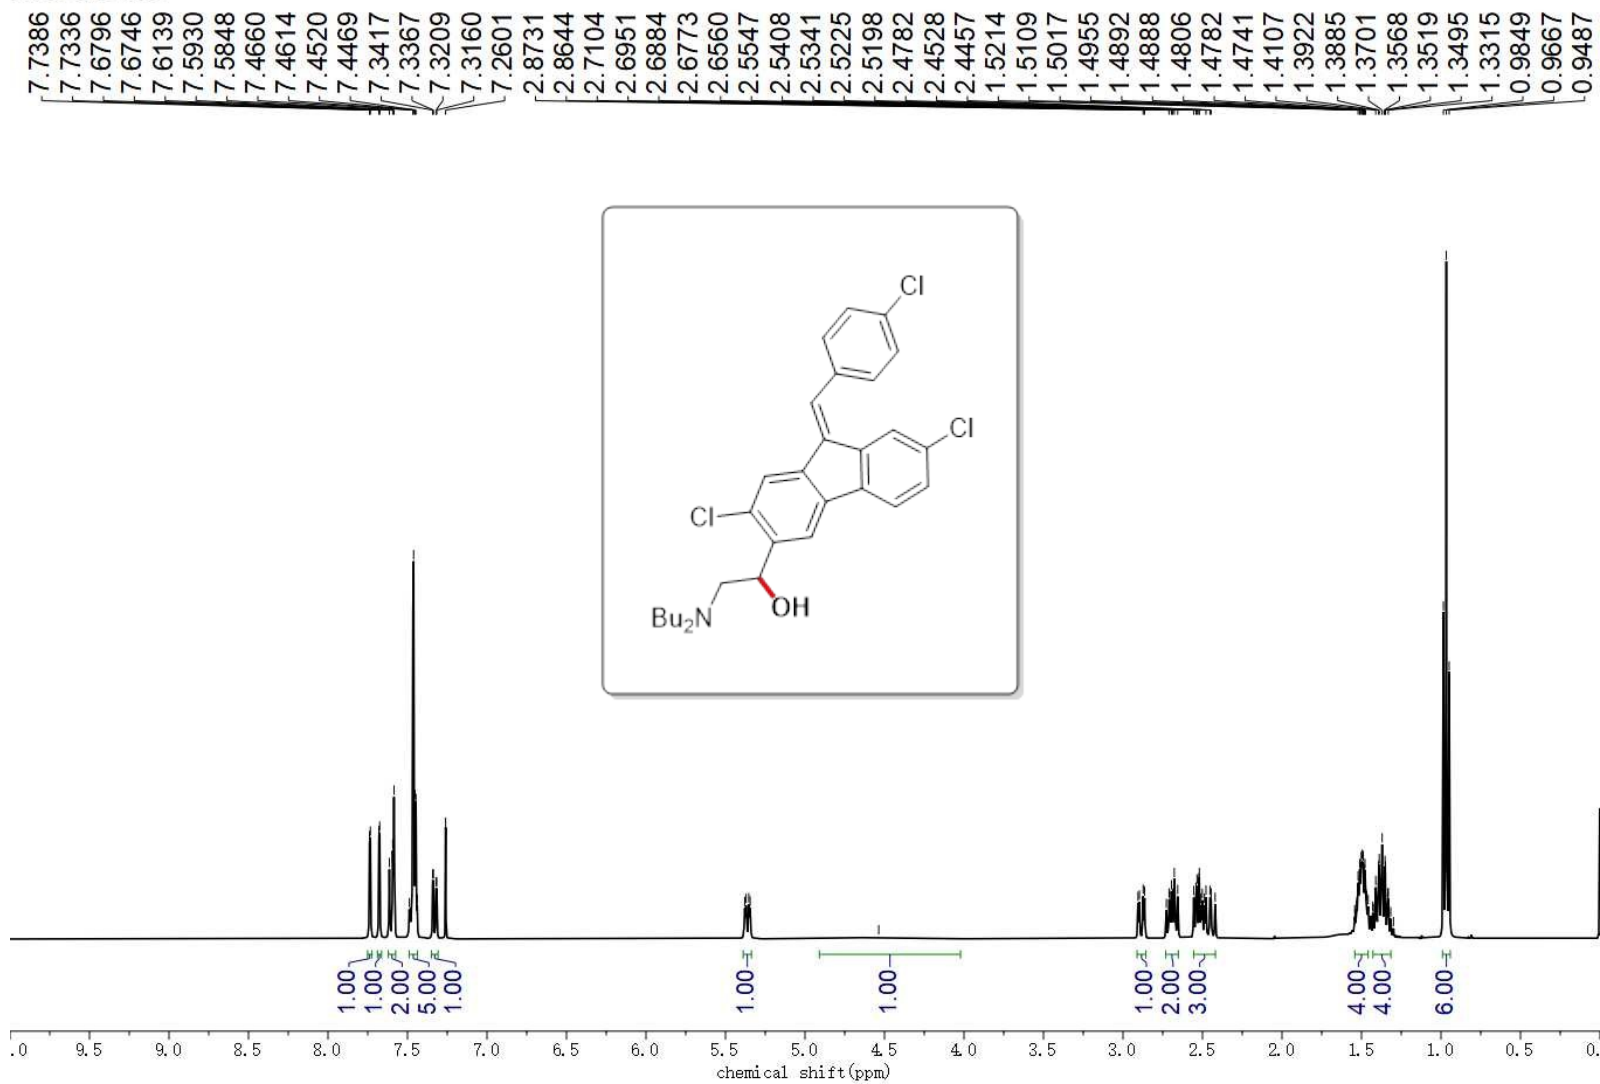

JWJ-2024-399

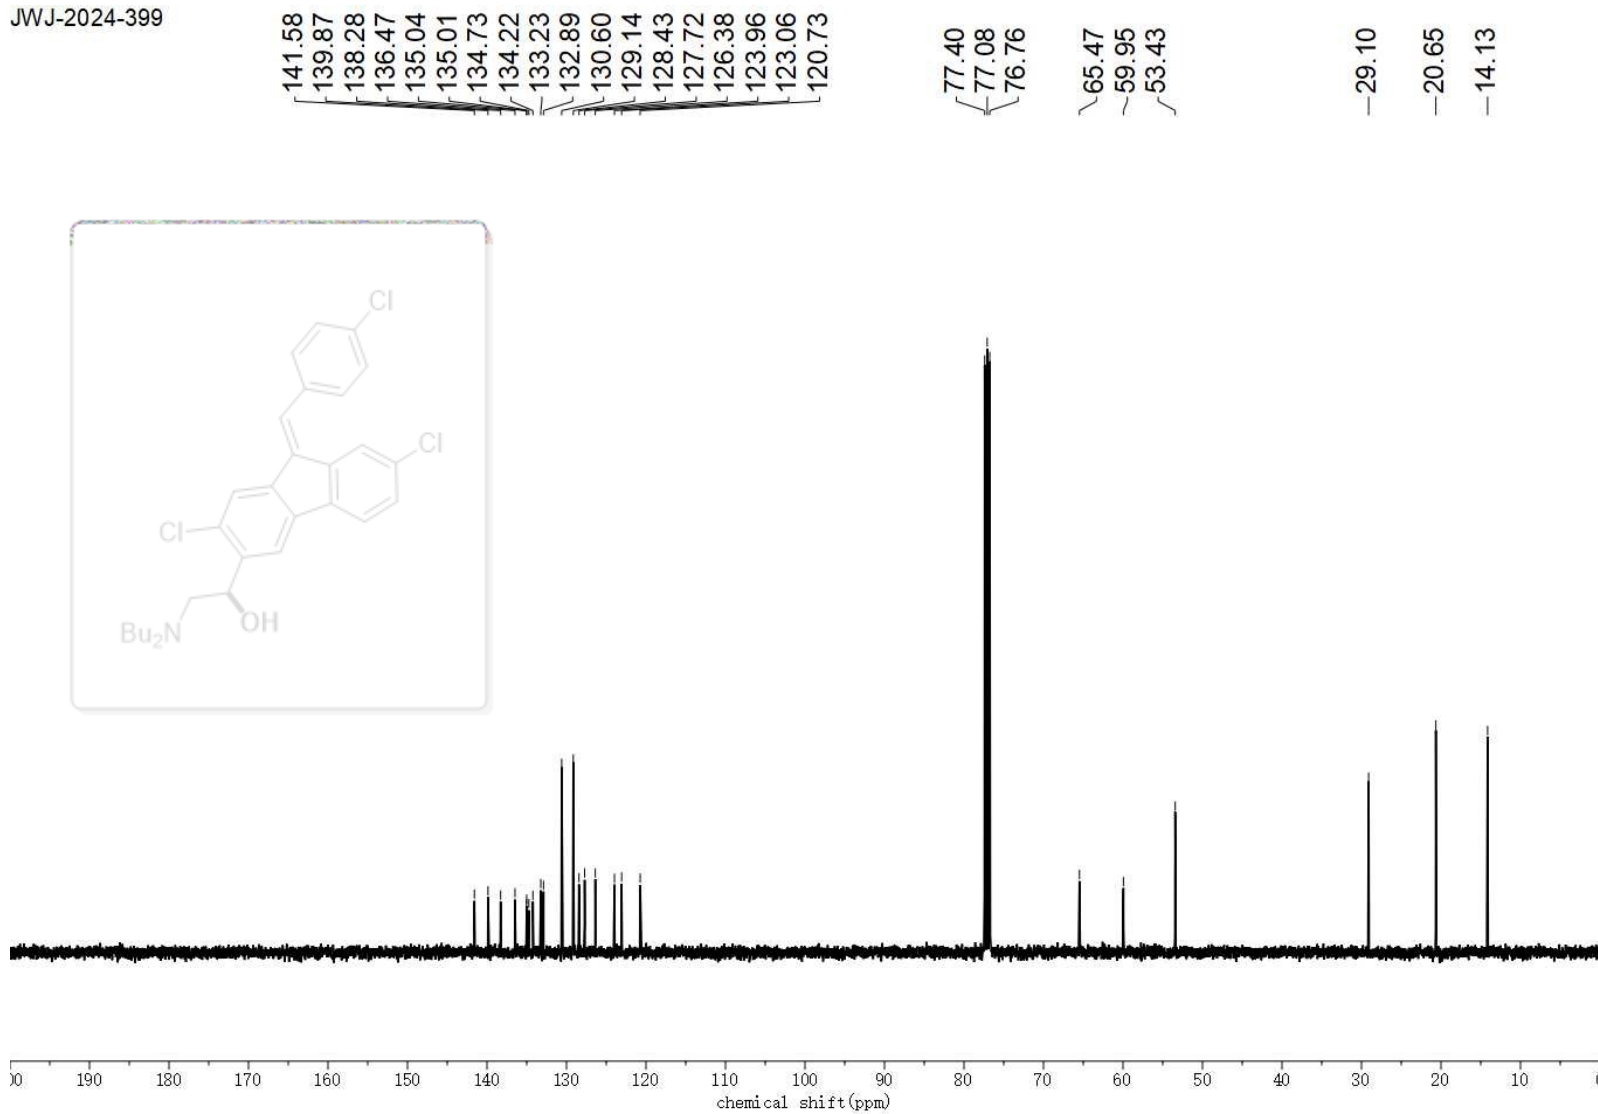



JWJ-2024-417

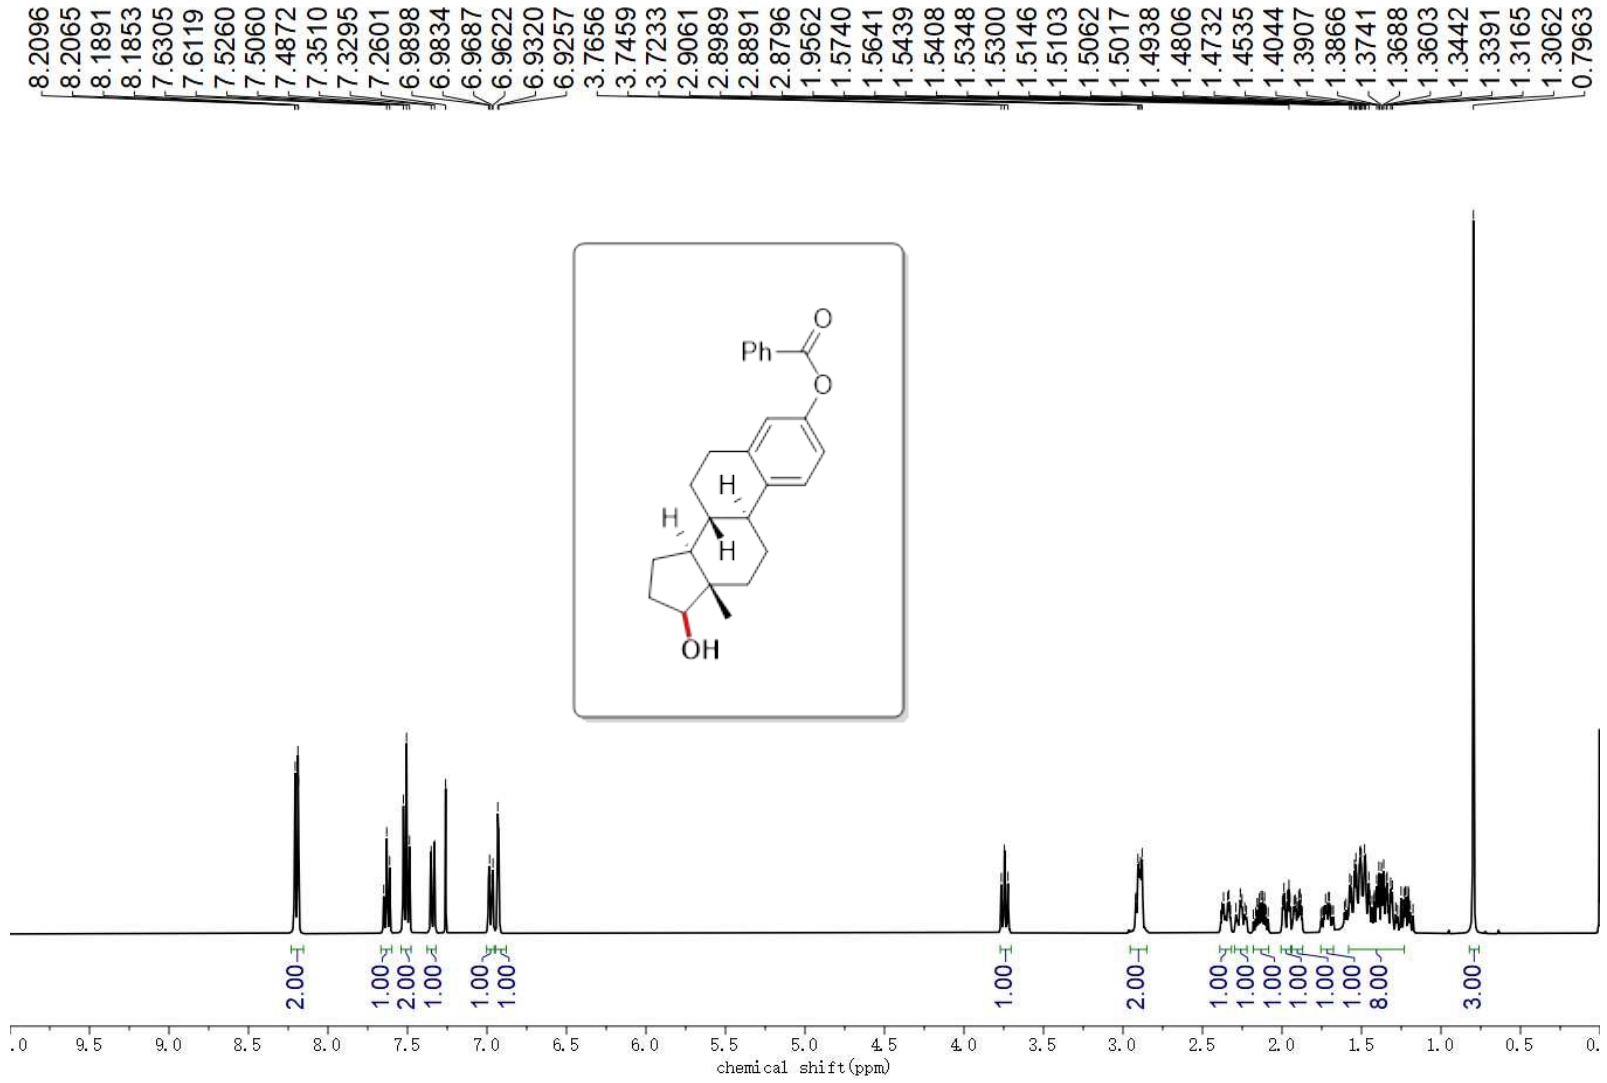

JWJ-2024-417

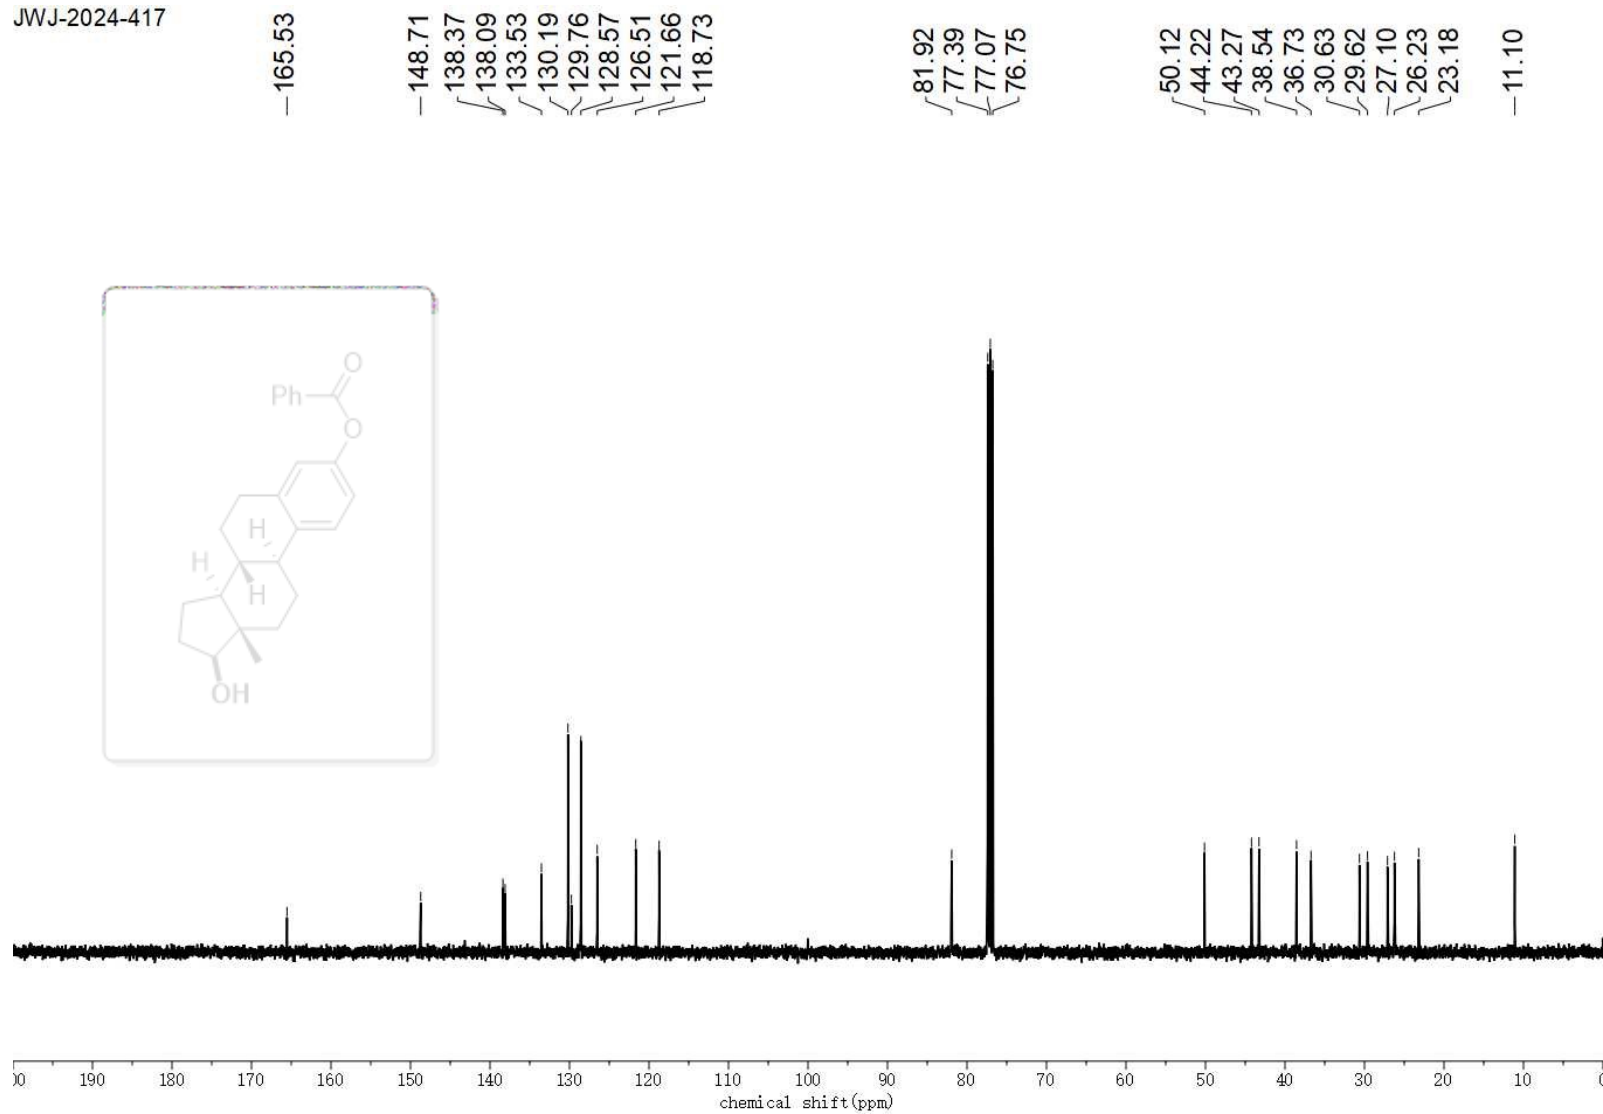

Supplement: d4qo02176b1.pdf [file d4qo02176b1.pdf]
